# Supplementary material for: Microbial Ecosystems in Movile Cave: An Environment of Extreme Life
Source: Life (Basel). 2023 Oct 26;13(11):2120. doi: 10.3390/life13112120 (PMC10672346; doi:10.3390/life13112120)
Supplement: Supplementary file 1 [file life-13-02120-s001.zip › Table S1.xlsx]

## Sheet: Blad1
#OTU ID	taxonomy	DW2016	DW2017.1	DW2017.2	DW2017.3	FB2015.1	FB2015.2	FB2016.1	FB2016.2	FB2016.3	FB2017.1	FB2017.2	LW2015.1	LW2015.2	LW2016	LW2017.1	LW2017.2	LW2017.3	SB2015.1	SB2015.2	SB2016.1	SB2016.2	SB2016.3	SB2017.1	SB2017.2	WB2016.1	WB2016.2	WB2017.1	WB2017.2
OTU307009271	Bacteria; Proteobacteria; Gammaproteobacteria; Chromatiales; Halothiobacillaceae; Thiovirga	575.0	517.0	426.0	571.0	228.0	117.0	0.0	6.0	8.0	28.0	25.0	41315.0	29884.0	14150.0	279.0	502.0	66.0	21.0	29.0	20.0	37.0	64.0	34.0	26.0	0.0	0.0	3.0	2.0
OTU504723319	Bacteria; Proteobacteria; Gammaproteobacteria; Xanthomonadales; Xanthomonadaceae; Stenotrophomonas; Stenotrophomonas maltophilia	0.0	224.0	78.0	502.0	0.0	0.0	3.0	0.0	0.0	1.0	1.0	0.0	3.0	2.0	14692.0	39567.0	47497.0	0.0	0.0	0.0	0.0	0.0	1.0	1.0	0.0	0.0	2.0	6.0
OTU12628602	Bacteria; Proteobacteria; Gammaproteobacteria; Chromatiales; Halothiobacillaceae; Thiovirga; uncultured bacterium	155.0	75.0	53.0	52.0	32.0	19.0	89.0	0.0	21.0	5.0	5.0	2637.0	1219.0	5495.0	31.0	77.0	21.0	87.0	121.0	70.0	42.0	345.0	79.0	63.0	2.0	14.0	12.0	9.0
OTU820858474	Bacteria; Proteobacteria; Deltaproteobacteria; Desulfobacterales; Desulfobulbaceae	1.0	4.0	6.0	8.0	0.0	0.0	0.0	0.0	0.0	0.0	3.0	0.0	0.0	2.0	4.0	3.0	0.0	409.0	291.0	2120.0	2627.0	9276.0	3238.0	1994.0	2.0	0.0	5.0	0.0
OTU338061931	Bacteria; Proteobacteria; Epsilonproteobacteria; Campylobacterales; Campylobacteraceae; Arcobacter; Ambiguous_taxa	35796.0	22468.0	20860.0	18194.0	3.0	1.0	2.0	23.0	1.0	213.0	279.0	1363.0	822.0	5797.0	2283.0	8630.0	1481.0	956.0	1025.0	11.0	6.0	14.0	20.0	8.0	0.0	0.0	1.0	2.0
OTU72384365	Bacteria; Proteobacteria; Gammaproteobacteria; Pseudomonadales; Pseudomonadaceae; Pseudomonas	0.0	1058.0	972.0	8.0	0.0	0.0	1.0	0.0	0.0	0.0	1.0	1.0	1.0	1116.0	28131.0	15652.0	8302.0	2.0	2.0	10.0	18.0	1.0	2.0	5.0	0.0	0.0	0.0	0.0
OTU252413983	Bacteria; Proteobacteria; Epsilonproteobacteria; Campylobacterales; Helicobacteraceae; Sulfuricurvum	88.0	114.0	89.0	50.0	1505.0	1349.0	25.0	2147.0	229.0	280.0	613.0	23.0	31.0	180.0	13.0	28.0	14.0	339.0	365.0	36.0	387.0	79.0	95.0	41.0	0.0	0.0	0.0	0.0
OTU93906283	Bacteria; Proteobacteria; Gammaproteobacteria; Pseudomonadales; Pseudomonadaceae; Pseudomonas; uncultured bacterium	0.0	351.0	234.0	7.0	0.0	0.0	0.0	9.0	0.0	0.0	0.0	0.0	0.0	29.0	4.0	3.0	0.0	1.0	0.0	3.0	6.0	47.0	41.0	36.0	0.0	80.0	1.0	1.0
OTU117560915	Bacteria; Proteobacteria; Deltaproteobacteria; Desulfobacterales; Desulfobacteraceae; uncultured; uncultured bacterium	1.0	0.0	0.0	0.0	34.0	40.0	327.0	189.0	1383.0	285.0	406.0	0.0	0.0	2.0	0.0	0.0	0.0	2.0	1.0	0.0	0.0	0.0	0.0	0.0	0.0	0.0	0.0	0.0
OTU395938792	Bacteria; Proteobacteria; Deltaproteobacteria; Desulfobacterales; Desulfobulbaceae; Desulfocapsa	2285.0	2756.0	2932.0	1703.0	7.0	8.0	185.0	915.0	1207.0	154.0	103.0	368.0	669.0	879.0	140.0	903.0	168.0	7.0	5.0	0.0	3.0	5.0	1.0	0.0	0.0	0.0	0.0	0.0
OTU225315543	Bacteria; Chloroflexi; Anaerolineae; Anaerolineales; Anaerolineaceae; uncultured; uncultured bacterium	0.0	0.0	0.0	0.0	0.0	0.0	0.0	0.0	0.0	0.0	0.0	0.0	0.0	1.0	0.0	0.0	0.0	0.0	0.0	0.0	0.0	0.0	26.0	20.0	246.0	28.0	1448.0	943.0
OTU754657877	Unassigned	0.0	0.0	0.0	0.0	0.0	0.0	0.0	0.0	0.0	0.0	0.0	0.0	0.0	0.0	0.0	1.0	0.0	0.0	0.0	0.0	0.0	0.0	13.0	2.0	27.0	30.0	530.0	734.0
OTU711716946	Bacteria; Proteobacteria; Deltaproteobacteria; NB1-j; Ambiguous_taxa; Ambiguous_taxa; Ambiguous_taxa	0.0	0.0	0.0	0.0	0.0	0.0	0.0	1.0	0.0	0.0	0.0	0.0	0.0	0.0	0.0	0.0	0.0	0.0	0.0	0.0	0.0	0.0	6.0	10.0	195.0	212.0	460.0	288.0
OTU851675374	Bacteria; Proteobacteria; Alphaproteobacteria; Alphaproteobacteria Incertae Sedis; uncultured; uncultured bacterium; uncultured bacterium	0.0	0.0	0.0	0.0	0.0	0.0	0.0	0.0	0.0	0.0	0.0	0.0	0.0	0.0	0.0	1.0	0.0	0.0	0.0	0.0	0.0	0.0	10.0	17.0	1012.0	1128.0	745.0	600.0
OTU296388610	Bacteria; Gemmatimonadetes; Gemmatimonadetes; Gemmatimonadales; Gemmatimonadaceae; uncultured	0.0	0.0	0.0	0.0	0.0	0.0	0.0	0.0	0.0	1.0	0.0	0.0	0.0	0.0	0.0	2.0	0.0	0.0	0.0	0.0	0.0	0.0	3.0	5.0	153.0	65.0	280.0	64.0
OTU379304835	Bacteria; Planctomycetes; Phycisphaerae; Phycisphaerales; Phycisphaeraceae; SM1A02; Ambiguous_taxa	0.0	0.0	0.0	0.0	0.0	0.0	0.0	0.0	0.0	0.0	0.0	0.0	0.0	0.0	0.0	0.0	0.0	0.0	0.0	0.0	0.0	0.0	1.0	2.0	15.0	0.0	108.0	23.0
OTU705074503	Bacteria; Proteobacteria; Gammaproteobacteria; Methylococcales; Methylococcaceae; Candidatus Methylospira	0.0	0.0	0.0	0.0	0.0	0.0	0.0	0.0	0.0	0.0	0.0	0.0	0.0	0.0	0.0	0.0	0.0	0.0	0.0	0.0	0.0	0.0	13.0	15.0	0.0	0.0	492.0	5.0
OTU614998969	Bacteria; Proteobacteria; Alphaproteobacteria; Rhodospirillales; I-10; uncultured bacterium; uncultured bacterium	0.0	1.0	0.0	0.0	0.0	0.0	0.0	0.0	0.0	2.0	4.0	0.0	0.0	1.0	0.0	3.0	0.0	0.0	0.0	0.0	0.0	0.0	5.0	1.0	179.0	37.0	241.0	349.0
OTU34610643	Bacteria; Proteobacteria; Gammaproteobacteria; Chromatiales; Halothiobacillaceae; uncultured; uncultured bacterium	13.0	23.0	13.0	6.0	347.0	384.0	80.0	488.0	485.0	46.0	117.0	6.0	5.0	4.0	3.0	4.0	4.0	4.0	7.0	0.0	2.0	0.0	3.0	5.0	0.0	0.0	0.0	0.0
OTU617765383	Bacteria; Chloroflexi; Anaerolineae; Anaerolineales; Anaerolineaceae; uncultured; uncultured bacterium	0.0	0.0	0.0	1.0	0.0	0.0	0.0	0.0	0.0	0.0	0.0	0.0	0.0	0.0	0.0	3.0	0.0	0.0	0.0	0.0	0.0	0.0	23.0	32.0	1233.0	279.0	1486.0	1903.0
OTU430457002	Bacteria; Proteobacteria; Deltaproteobacteria; Desulfobacterales; Desulfobulbaceae; uncultured; Ambiguous_taxa	1.0	7.0	2.0	2.0	3.0	1.0	48.0	58.0	20.0	27.0	15.0	0.0	0.0	0.0	0.0	2.0	0.0	0.0	2.0	1.0	0.0	0.0	0.0	0.0	0.0	0.0	0.0	0.0
OTU760322327	Bacteria; Chloroflexi; Anaerolineae; Anaerolineales; Anaerolineaceae; uncultured; uncultured bacterium	0.0	0.0	0.0	0.0	0.0	0.0	0.0	0.0	0.0	0.0	0.0	0.0	0.0	0.0	0.0	3.0	0.0	0.0	0.0	0.0	0.0	0.0	10.0	11.0	1738.0	1407.0	680.0	1089.0
OTU47393794	Bacteria; Chloroflexi; Anaerolineae; Anaerolineales; Anaerolineaceae; Leptolinea	0.0	0.0	1.0	0.0	0.0	0.0	7.0	55.0	58.0	33.0	55.0	0.0	0.0	0.0	0.0	0.0	1.0	0.0	0.0	0.0	0.0	0.0	0.0	2.0	0.0	0.0	0.0	0.0
OTU85078032	Bacteria; Proteobacteria; Alphaproteobacteria	0.0	0.0	0.0	0.0	0.0	0.0	0.0	0.0	0.0	0.0	0.0	0.0	0.0	0.0	0.0	0.0	1.0	0.0	0.0	0.0	0.0	0.0	1.0	0.0	311.0	28.0	121.0	178.0
OTU999722196	Bacteria; Proteobacteria; Gammaproteobacteria; Aeromonadales; Aeromonadaceae; Aeromonas	1.0	1440.0	1178.0	330.0	0.0	0.0	0.0	10.0	0.0	1.0	3.0	7.0	5.0	2097.0	2.0	0.0	0.0	1.0	0.0	118.0	323.0	124.0	79.0	43.0	0.0	0.0	0.0	0.0
OTU782901921	Bacteria; Proteobacteria; Gammaproteobacteria; Pseudomonadales; Pseudomonadaceae; Pseudomonas; Ambiguous_taxa	257.0	873.0	752.0	14.0	0.0	0.0	0.0	0.0	0.0	0.0	1.0	0.0	0.0	1508.0	26.0	2.0	0.0	0.0	0.0	314.0	571.0	1181.0	38.0	36.0	0.0	0.0	0.0	0.0
OTU13457575	Bacteria; Proteobacteria; Gammaproteobacteria; Pseudomonadales; Moraxellaceae; Acinetobacter; uncultured bacterium	0.0	0.0	0.0	4930.0	0.0	0.0	0.0	0.0	0.0	1.0	1.0	36.0	26.0	172.0	0.0	0.0	0.0	4.0	2.0	0.0	0.0	0.0	0.0	0.0	0.0	0.0	0.0	0.0
OTU845102751	Bacteria; Proteobacteria; Deltaproteobacteria; Desulfobacterales; Desulfobulbaceae; Desulfocapsa; Ambiguous_taxa	42.0	79.0	60.0	45.0	16.0	5.0	7.0	81.0	67.0	124.0	111.0	4.0	10.0	43.0	4.0	35.0	6.0	15.0	10.0	4.0	1.0	2.0	7.0	5.0	0.0	0.0	3.0	1.0
OTU115065189	Bacteria; Proteobacteria; Gammaproteobacteria; Aeromonadales; Aeromonadaceae; Aeromonas	0.0	388.0	435.0	55.0	0.0	0.0	1.0	8.0	0.0	4.0	5.0	2.0	18.0	2060.0	0.0	1.0	0.0	3.0	16.0	102.0	178.0	49.0	1967.0	1644.0	0.0	0.0	0.0	0.0
OTU413947533	Bacteria; Proteobacteria; Epsilonproteobacteria; Campylobacterales; Campylobacteraceae; Sulfurospirillum; uncultured bacterium	412.0	127.0	142.0	96.0	23.0	21.0	1.0	25017.0	5.0	13.0	16.0	96.0	345.0	41.0	8.0	23.0	5.0	10.0	15.0	0.0	0.0	2.0	1.0	0.0	0.0	0.0	0.0	0.0
OTU153157952	Bacteria; Proteobacteria; Betaproteobacteria; Burkholderiales; Comamonadaceae	16.0	17.0	9.0	9.0	67.0	111.0	0.0	5.0	22.0	12.0	41.0	245.0	106.0	84.0	0.0	4.0	5.0	7.0	8.0	4.0	321.0	4.0	60.0	28.0	4.0	0.0	0.0	0.0
OTU10043363	Bacteria; Bacteroidetes; Flavobacteriia; Flavobacteriales; Flavobacteriaceae; Flavobacterium	0.0	1.0	1.0	0.0	0.0	0.0	0.0	0.0	0.0	0.0	0.0	4.0	1.0	72.0	0.0	0.0	0.0	2.0	2.0	2.0	886.0	0.0	92.0	62.0	0.0	0.0	0.0	0.0
OTU115595509	Bacteria; Firmicutes; Bacilli; Bacillales	0.0	0.0	0.0	545.0	1.0	0.0	0.0	0.0	0.0	0.0	0.0	0.0	0.0	0.0	0.0	0.0	0.0	0.0	0.0	3.0	21.0	5.0	0.0	0.0	0.0	0.0	0.0	0.0
OTU533862728	Bacteria; Proteobacteria; Alphaproteobacteria; Rhizobiales; Hyphomicrobiaceae; Rhodomicrobium; Ambiguous_taxa	1.0	0.0	0.0	1.0	1.0	11.0	257.0	2307.0	2116.0	9364.0	9988.0	0.0	0.0	0.0	0.0	0.0	0.0	0.0	0.0	0.0	0.0	0.0	0.0	0.0	226.0	148.0	3.0	0.0
OTU489615336	Bacteria; Proteobacteria; Betaproteobacteria; Rhodocyclales; Rhodocyclaceae; uncultured; uncultured bacterium	11.0	3.0	2.0	6.0	69.0	94.0	30.0	293.0	300.0	234.0	202.0	1.0	1.0	7.0	1.0	2.0	0.0	1.0	6.0	2.0	4.0	0.0	3.0	1.0	0.0	0.0	0.0	1.0
OTU583902228	Bacteria; Actinobacteria; Actinobacteria; Micrococcales; Micrococcaceae; Pseudarthrobacter	0.0	17.0	85.0	2402.0	0.0	0.0	0.0	0.0	0.0	1.0	0.0	0.0	0.0	135.0	0.0	31.0	4.0	0.0	1.0	0.0	15.0	13.0	0.0	0.0	0.0	0.0	0.0	0.0
OTU142955564	Bacteria; Proteobacteria; Gammaproteobacteria; Enterobacteriales; Enterobacteriaceae; Enterobacter; Ambiguous_taxa	0.0	790.0	674.0	1014.0	0.0	0.0	0.0	0.0	1.0	3.0	0.0	0.0	0.0	10.0	0.0	5.0	0.0	0.0	0.0	0.0	0.0	0.0	0.0	0.0	0.0	5.0	0.0	0.0
OTU258662779	Bacteria; Proteobacteria; Betaproteobacteria; Methylophilales; Methylophilaceae; uncultured	0.0	0.0	0.0	0.0	1729.0	930.0	1963.0	8476.0	1400.0	2089.0	5054.0	0.0	0.0	3.0	0.0	0.0	0.0	0.0	1.0	1.0	0.0	0.0	0.0	0.0	0.0	0.0	0.0	2.0
OTU622116494	Bacteria; Proteobacteria; Gammaproteobacteria; Pseudomonadales; Pseudomonadaceae; Pseudomonas	0.0	3579.0	4249.0	269.0	0.0	0.0	0.0	0.0	0.0	0.0	0.0	0.0	0.0	24.0	2.0	0.0	0.0	9.0	8.0	0.0	6.0	1.0	1.0	1.0	0.0	0.0	0.0	0.0
OTU331844840	Bacteria; Bacteroidetes; Bacteroidia; Bacteroidia Incertae Sedis; Draconibacteriaceae; uncultured; uncultured bacterium	0.0	0.0	0.0	0.0	208.0	267.0	423.0	989.0	2294.0	1808.0	1636.0	0.0	0.0	0.0	0.0	0.0	1.0	1.0	0.0	0.0	0.0	0.0	0.0	0.0	0.0	0.0	1.0	0.0
OTU969695081	Bacteria; Deferribacteres; Deferribacteres Incertae Sedis; Unknown Order; Unknown Family; Caldithrix; uncultured bacterium	0.0	0.0	0.0	0.0	6.0	12.0	63.0	21.0	1093.0	3376.0	2297.0	0.0	0.0	1.0	0.0	0.0	0.0	2.0	0.0	0.0	0.0	0.0	0.0	2.0	0.0	0.0	0.0	0.0
OTU602054641	Bacteria; Proteobacteria; Gammaproteobacteria; Pseudomonadales; Moraxellaceae; Acinetobacter; uncultured bacterium	0.0	456.0	11727.0	65.0	0.0	0.0	0.0	0.0	0.0	1.0	2.0	0.0	12.0	58.0	0.0	0.0	0.0	0.0	0.0	0.0	0.0	0.0	0.0	0.0	0.0	0.0	0.0	0.0
OTU657338202	Bacteria; Proteobacteria; Alphaproteobacteria; Rhodospirillales; B79; uncultured bacterium; uncultured bacterium	0.0	0.0	0.0	0.0	2.0	8.0	39.0	11.0	51.0	764.0	1111.0	0.0	0.0	0.0	0.0	0.0	0.0	0.0	0.0	0.0	0.0	0.0	0.0	0.0	0.0	0.0	0.0	0.0
OTU498828213	Bacteria; Proteobacteria; Gammaproteobacteria; Methylococcales; Methylococcaceae; Candidatus Methylospira; uncultured bacterium	0.0	0.0	0.0	0.0	0.0	0.0	0.0	0.0	0.0	590.0	2493.0	0.0	0.0	0.0	0.0	0.0	0.0	0.0	0.0	0.0	0.0	0.0	0.0	0.0	0.0	0.0	0.0	0.0
OTU385145335	Bacteria; Proteobacteria; Alphaproteobacteria; Caulobacterales; Hyphomonadaceae; Woodsholea; uncultured bacterium	0.0	0.0	1.0	0.0	92.0	138.0	206.0	586.0	426.0	963.0	1685.0	0.0	0.0	0.0	0.0	0.0	0.0	0.0	0.0	0.0	0.0	0.0	0.0	0.0	96.0	21.0	23.0	48.0
OTU206261180	Bacteria; Proteobacteria; Deltaproteobacteria; Sva0485; Ambiguous_taxa; Ambiguous_taxa; Ambiguous_taxa	0.0	4.0	1.0	0.0	0.0	0.0	0.0	0.0	0.0	1.0	0.0	1.0	0.0	0.0	0.0	0.0	0.0	285.0	286.0	361.0	1599.0	1624.0	543.0	418.0	0.0	0.0	0.0	0.0
OTU859692949	Bacteria; Proteobacteria; Alphaproteobacteria; Rhodospirillales; Rhodospirillaceae; Azospirillum	1.0	0.0	0.0	0.0	20.0	32.0	1704.0	849.0	3818.0	22.0	37.0	0.0	0.0	0.0	0.0	0.0	0.0	0.0	0.0	0.0	0.0	0.0	0.0	0.0	0.0	0.0	1.0	0.0
OTU551966045	Bacteria; Spirochaetae; Spirochaetes; Spirochaetales; Spirochaetaceae; uncultured; Ambiguous_taxa	0.0	0.0	0.0	0.0	92.0	84.0	65.0	3830.0	599.0	1341.0	1210.0	0.0	0.0	1.0	0.0	0.0	0.0	1.0	0.0	0.0	0.0	1.0	0.0	0.0	0.0	0.0	0.0	0.0
OTU512060451	Bacteria; Proteobacteria; Betaproteobacteria; Methylophilales; Methylophilaceae; uncultured; uncultured bacterium	0.0	0.0	0.0	0.0	1219.0	890.0	941.0	2148.0	2288.0	59.0	71.0	0.0	0.0	1.0	0.0	0.0	0.0	0.0	0.0	0.0	0.0	0.0	0.0	0.0	0.0	0.0	0.0	1.0
OTU812504467	Bacteria; Spirochaetae; Spirochaetes; Spirochaetales; Spirochaetaceae; uncultured; Ambiguous_taxa	0.0	2.0	0.0	0.0	12.0	18.0	44.0	1385.0	235.0	51.0	81.0	0.0	0.0	0.0	0.0	0.0	0.0	0.0	0.0	0.0	0.0	0.0	0.0	0.0	0.0	0.0	0.0	0.0
OTU685072936	Bacteria; Chloroflexi; Anaerolineae; Anaerolineales; Anaerolineaceae; uncultured; uncultured organism	0.0	0.0	0.0	0.0	0.0	2.0	30.0	42.0	177.0	166.0	159.0	0.0	0.0	0.0	0.0	0.0	0.0	0.0	0.0	0.0	0.0	0.0	0.0	0.0	6.0	0.0	0.0	0.0
OTU520488914	Bacteria; Proteobacteria; Deltaproteobacteria; Desulfobacterales; Desulfobacteraceae; uncultured; uncultured bacterium	0.0	0.0	0.0	1.0	56.0	68.0	873.0	1485.0	3985.0	525.0	907.0	0.0	0.0	0.0	0.0	0.0	0.0	1.0	1.0	0.0	0.0	0.0	0.0	0.0	0.0	0.0	0.0	0.0
OTU359196925	Bacteria; Proteobacteria; Alphaproteobacteria; Rickettsiales; SM2D12; uncultured bacterium; uncultured bacterium	0.0	0.0	0.0	0.0	18.0	40.0	0.0	41.0	32.0	144.0	160.0	0.0	0.0	0.0	0.0	0.0	0.0	0.0	0.0	0.0	0.0	0.0	0.0	0.0	0.0	0.0	0.0	0.0
OTU626087071	Bacteria; Proteobacteria; Deltaproteobacteria; Desulfobacterales; Desulfobacteraceae	0.0	0.0	0.0	0.0	9.0	19.0	176.0	756.0	441.0	407.0	346.0	0.0	0.0	0.0	0.0	0.0	0.0	0.0	0.0	0.0	0.0	0.0	0.0	0.0	0.0	0.0	0.0	1.0
OTU769808722	Bacteria; Firmicutes; Bacilli; Bacillales; Planococcaceae	0.0	109.0	0.0	14.0	0.0	0.0	0.0	0.0	0.0	0.0	0.0	0.0	0.0	28.0	0.0	1.0	0.0	0.0	0.0	2.0	0.0	0.0	4.0	4.0	0.0	0.0	0.0	0.0
OTU141148641	Bacteria; Proteobacteria; Deltaproteobacteria; Desulfobacterales; Desulfobulbaceae; uncultured; Ambiguous_taxa	2.0	6.0	3.0	7.0	1.0	8.0	42.0	138.0	115.0	398.0	328.0	0.0	0.0	1.0	0.0	1.0	0.0	0.0	1.0	0.0	0.0	0.0	0.0	0.0	0.0	0.0	0.0	0.0
OTU251859407	Bacteria; Bacteroidetes; Cytophagia; Cytophagales; Cytophagaceae; uncultured; uncultured bacterium	0.0	0.0	0.0	0.0	0.0	0.0	0.0	0.0	0.0	85.0	395.0	0.0	0.0	0.0	0.0	0.0	0.0	0.0	0.0	0.0	0.0	0.0	0.0	0.0	0.0	0.0	0.0	0.0
OTU848628928	Bacteria; Proteobacteria; Alphaproteobacteria; Alphaproteobacteria Incertae Sedis; Unknown Family; uncultured; uncultured bacterium	0.0	0.0	0.0	0.0	2.0	4.0	25.0	127.0	105.0	15.0	39.0	0.0	0.0	0.0	0.0	0.0	0.0	0.0	0.0	0.0	0.0	0.0	0.0	0.0	0.0	0.0	0.0	0.0
OTU934878124	Bacteria; Proteobacteria; Alphaproteobacteria; Alphaproteobacteria Incertae Sedis; uncultured; uncultured bacterium; uncultured bacterium	0.0	0.0	0.0	0.0	0.0	4.0	0.0	0.0	0.0	1387.0	1461.0	0.0	0.0	0.0	0.0	0.0	0.0	0.0	0.0	0.0	0.0	0.0	0.0	0.0	0.0	0.0	0.0	0.0
OTU38335165	Bacteria; Planctomycetes; OM190; uncultured bacterium; uncultured bacterium; uncultured bacterium; uncultured bacterium	0.0	0.0	0.0	0.0	4.0	6.0	60.0	23.0	72.0	89.0	317.0	0.0	0.0	0.0	0.0	0.0	0.0	0.0	0.0	0.0	0.0	0.0	0.0	0.0	0.0	0.0	0.0	0.0
OTU411320028	Bacteria; Proteobacteria; Epsilonproteobacteria; Campylobacterales; Helicobacteraceae; Sulfurovum; Ambiguous_taxa	16.0	35.0	30.0	18.0	21.0	24.0	51.0	227.0	472.0	3.0	10.0	10.0	9.0	25.0	31.0	16.0	4.0	79.0	94.0	6.0	0.0	9.0	7.0	5.0	1.0	7.0	3.0	2.0
OTU787342477	Bacteria; Spirochaetae; Spirochaetes; Spirochaetales; Spirochaetaceae; uncultured; uncultured bacterium	0.0	0.0	0.0	0.0	40.0	52.0	91.0	1084.0	656.0	456.0	599.0	0.0	0.0	0.0	0.0	0.0	0.0	1.0	0.0	0.0	0.0	0.0	0.0	0.0	0.0	0.0	0.0	0.0
OTU787847685	Bacteria; Proteobacteria; Gammaproteobacteria; Xanthomonadales; Xanthomonadaceae; Aquimonas	26.0	22.0	10.0	16.0	4730.0	5235.0	378.0	954.0	1202.0	433.0	677.0	82.0	54.0	35.0	2.0	12.0	1.0	1.0	2.0	0.0	1.0	1.0	0.0	0.0	0.0	0.0	0.0	0.0
OTU844074487	Bacteria; Proteobacteria; Betaproteobacteria; Hydrogenophilales; Hydrogenophilaceae; Thiobacillus; Ambiguous_taxa	0.0	12.0	3.0	10.0	109.0	89.0	296.0	542.0	172.0	112.0	2978.0	1.0	1.0	6.0	3.0	0.0	0.0	0.0	1.0	0.0	39.0	0.0	4.0	2.0	1.0	21.0	31.0	0.0
OTU169211429	Bacteria; Proteobacteria; Gammaproteobacteria; Legionellales; Coxiellaceae; Coxiella; uncultured bacterium	0.0	17.0	7.0	3.0	0.0	0.0	8.0	41.0	29.0	2.0	2.0	0.0	0.0	0.0	0.0	1.0	0.0	1.0	0.0	0.0	2.0	0.0	0.0	0.0	0.0	0.0	0.0	0.0
OTU150285170	Bacteria; Firmicutes; Clostridia; Clostridiales; Christensenellaceae; Christensenellaceae R-7 group; Ambiguous_taxa	2.0	0.0	0.0	0.0	4.0	13.0	84.0	603.0	462.0	68.0	75.0	0.0	0.0	0.0	0.0	0.0	0.0	0.0	0.0	0.0	0.0	0.0	0.0	0.0	0.0	0.0	0.0	0.0
OTU704551776	Bacteria; Proteobacteria; Betaproteobacteria; Rhodocyclales; Rhodocyclaceae; uncultured	12.0	13.0	9.0	7.0	50.0	102.0	37.0	319.0	313.0	1738.0	1673.0	0.0	0.0	3.0	0.0	0.0	0.0	1.0	1.0	0.0	0.0	0.0	0.0	0.0	0.0	0.0	0.0	0.0
OTU778108125	Bacteria; Planctomycetes; Phycisphaerae; Phycisphaerales; Phycisphaeraceae; SM1A02; uncultured bacterium	0.0	0.0	0.0	0.0	54.0	63.0	6.0	15.0	4.0	51.0	66.0	0.0	0.0	0.0	0.0	0.0	0.0	0.0	0.0	0.0	0.0	0.0	0.0	0.0	0.0	0.0	0.0	0.0
OTU494589413	Bacteria; Spirochaetae; Spirochaetes; Spirochaetales; Leptospiraceae; uncultured	0.0	0.0	0.0	0.0	0.0	1.0	0.0	0.0	0.0	243.0	214.0	0.0	0.0	0.0	0.0	0.0	0.0	0.0	0.0	0.0	0.0	0.0	0.0	0.0	0.0	0.0	0.0	0.0
OTU82981435	Bacteria; Verrucomicrobia; MSBL3	0.0	0.0	0.0	0.0	12.0	7.0	474.0	949.0	1637.0	249.0	794.0	0.0	0.0	0.0	0.0	0.0	0.0	0.0	0.0	0.0	0.0	0.0	0.0	0.0	0.0	0.0	0.0	0.0
OTU116366694	Bacteria; Proteobacteria; Gammaproteobacteria; Thiotrichales; Thiotrichaceae; uncultured; Ambiguous_taxa	0.0	0.0	0.0	0.0	70.0	57.0	11.0	0.0	110.0	321.0	1345.0	0.0	0.0	0.0	0.0	0.0	0.0	0.0	0.0	0.0	0.0	0.0	0.0	0.0	0.0	0.0	0.0	0.0
OTU966203848	Bacteria; Nitrospirae; Nitrospira; Nitrospirales; Nitrospiraceae; uncultured; uncultured bacterium	4.0	36.0	19.0	18.0	1.0	0.0	0.0	1.0	0.0	0.0	6.0	1.0	0.0	1.0	1.0	1.0	1.0	79.0	96.0	8.0	7.0	5.0	55.0	36.0	0.0	0.0	0.0	0.0
OTU641309508	Bacteria; Bacteroidetes; SB-5	0.0	0.0	0.0	0.0	3.0	0.0	8.0	81.0	34.0	383.0	628.0	0.0	0.0	0.0	0.0	0.0	0.0	4.0	1.0	0.0	2.0	4.0	0.0	0.0	0.0	0.0	0.0	0.0
OTU139610518	Bacteria; Nitrospirae; Nitrospira; Nitrospirales; Nitrospiraceae; uncultured; uncultured Nitrospirae bacterium	0.0	3.0	7.0	1.0	0.0	0.0	0.0	0.0	0.0	0.0	0.0	0.0	0.0	0.0	0.0	1.0	0.0	1029.0	967.0	2790.0	9254.0	13178.0	2178.0	1626.0	0.0	0.0	0.0	1.0
OTU298716086	Bacteria; Proteobacteria; Alphaproteobacteria; Rhizobiales; Methylobacteriaceae; Methylobacterium; Ambiguous_taxa	0.0	1150.0	301.0	4965.0	0.0	0.0	0.0	0.0	0.0	2.0	0.0	0.0	0.0	0.0	5.0	5.0	7.0	0.0	0.0	0.0	0.0	0.0	0.0	0.0	1.0	0.0	0.0	0.0
OTU842774814	Bacteria; Proteobacteria; Betaproteobacteria; Burkholderiales; Burkholderiaceae; Cupriavidus; Ambiguous_taxa	0.0	0.0	0.0	0.0	0.0	0.0	0.0	0.0	1.0	1.0	0.0	0.0	0.0	0.0	16.0	277.0	211.0	0.0	0.0	0.0	0.0	1.0	0.0	0.0	0.0	1.0	0.0	0.0
OTU896967583	Bacteria; Proteobacteria; Deltaproteobacteria; Sva0485	0.0	3.0	6.0	6.0	0.0	0.0	0.0	0.0	0.0	0.0	0.0	1.0	0.0	0.0	0.0	0.0	0.0	327.0	283.0	540.0	1466.0	2190.0	745.0	586.0	1.0	0.0	0.0	0.0
OTU601027398	Bacteria; Proteobacteria; Alphaproteobacteria; Rhizobiales; Rhizobiaceae	0.0	17.0	5.0	13.0	12.0	25.0	5.0	140.0	140.0	67.0	81.0	1.0	0.0	0.0	0.0	2.0	0.0	0.0	0.0	0.0	50.0	20.0	0.0	0.0	6.0	9.0	0.0	0.0
OTU383264652	Bacteria; Verrucomicrobia; Spartobacteria; Chthoniobacterales; Chthoniobacterales Incertae Sedis; Terrimicrobium	0.0	0.0	0.0	0.0	0.0	0.0	28.0	297.0	206.0	0.0	0.0	0.0	0.0	0.0	0.0	0.0	0.0	0.0	0.0	0.0	0.0	0.0	0.0	0.0	0.0	0.0	0.0	0.0
OTU858511489	Bacteria; Nitrospirae; Nitrospira; Nitrospirales; Nitrospiraceae; uncultured	1.0	23.0	7.0	31.0	0.0	0.0	3.0	4.0	0.0	3.0	1.0	1.0	0.0	2.0	4.0	0.0	0.0	28319.0	24753.0	22891.0	86651.0	100102.0	50252.0	34774.0	2.0	0.0	1.0	0.0
OTU479999760	Bacteria; Aminicenantes; uncultured bacterium; uncultured bacterium; uncultured bacterium; uncultured bacterium; uncultured bacterium	0.0	12.0	8.0	4.0	0.0	0.0	0.0	1.0	0.0	0.0	0.0	0.0	0.0	1.0	0.0	0.0	0.0	140.0	136.0	267.0	1001.0	1703.0	801.0	580.0	0.0	0.0	1.0	0.0
OTU286497509	Bacteria; Aminicenantes; uncultured bacterium; uncultured bacterium; uncultured bacterium; uncultured bacterium; uncultured bacterium	0.0	0.0	0.0	0.0	0.0	0.0	0.0	0.0	0.0	0.0	0.0	0.0	0.0	0.0	0.0	0.0	0.0	26.0	17.0	35.0	159.0	201.0	36.0	33.0	0.0	0.0	0.0	0.0
OTU727992392	Bacteria; Nitrospirae; Nitrospira; Nitrospirales; Nitrospiraceae; uncultured; uncultured bacterium	0.0	0.0	0.0	1.0	0.0	0.0	0.0	0.0	0.0	0.0	0.0	0.0	0.0	1.0	0.0	0.0	0.0	37.0	29.0	109.0	565.0	1008.0	296.0	252.0	0.0	0.0	0.0	0.0
OTU31238159	Bacteria; Chloroflexi; Anaerolineae; Anaerolineales; Anaerolineaceae; uncultured; uncultured bacterium	1.0	0.0	0.0	0.0	0.0	0.0	0.0	0.0	0.0	0.0	0.0	0.0	0.0	0.0	0.0	1.0	1.0	122.0	131.0	111.0	193.0	510.0	258.0	151.0	0.0	0.0	0.0	0.0
OTU945598751	Bacteria; Proteobacteria; Deltaproteobacteria; Sva0485	0.0	5.0	0.0	0.0	0.0	0.0	0.0	0.0	0.0	0.0	0.0	0.0	0.0	0.0	1.0	0.0	0.0	221.0	229.0	358.0	1144.0	1710.0	761.0	507.0	0.0	0.0	0.0	0.0
OTU505611845	Bacteria; Nitrospirae; Nitrospira; Nitrospirales; Nitrospiraceae; uncultured	0.0	2.0	0.0	2.0	0.0	0.0	0.0	0.0	0.0	0.0	0.0	0.0	0.0	0.0	0.0	0.0	0.0	57.0	49.0	314.0	748.0	947.0	344.0	304.0	0.0	0.0	0.0	0.0
OTU541763265	Bacteria; Chloroflexi; SBR2076; uncultured bacterium; uncultured bacterium; uncultured bacterium; uncultured bacterium	0.0	0.0	0.0	0.0	0.0	0.0	0.0	0.0	0.0	0.0	0.0	0.0	0.0	1.0	0.0	0.0	0.0	36.0	34.0	36.0	101.0	263.0	47.0	41.0	0.0	0.0	0.0	0.0
OTU286584052	Unassigned	0.0	1.0	1.0	4.0	0.0	0.0	0.0	0.0	0.0	0.0	0.0	0.0	0.0	0.0	0.0	0.0	0.0	85.0	56.0	382.0	954.0	1463.0	551.0	417.0	0.0	0.0	0.0	0.0
OTU957403481	Bacteria; Latescibacteria	0.0	0.0	0.0	0.0	0.0	0.0	0.0	0.0	0.0	0.0	0.0	0.0	0.0	0.0	0.0	0.0	0.0	19.0	17.0	50.0	91.0	355.0	39.0	31.0	0.0	0.0	0.0	0.0
OTU925250015	Bacteria; Nitrospirae; Nitrospira; Nitrospirales; Nitrospiraceae; uncultured; uncultured bacterium	0.0	2.0	0.0	0.0	0.0	0.0	0.0	0.0	0.0	0.0	0.0	0.0	0.0	0.0	0.0	0.0	0.0	64.0	23.0	98.0	278.0	251.0	180.0	116.0	0.0	0.0	0.0	0.0
OTU717879656	Unassigned	0.0	0.0	0.0	0.0	3.0	2.0	136.0	1229.0	822.0	2.0	8.0	1.0	0.0	0.0	0.0	0.0	0.0	0.0	0.0	0.0	0.0	0.0	0.0	0.0	0.0	0.0	0.0	0.0
OTU599882262	Unassigned	0.0	6.0	3.0	2.0	0.0	0.0	0.0	0.0	0.0	2.0	0.0	0.0	0.0	0.0	0.0	0.0	0.0	163.0	157.0	204.0	788.0	1155.0	691.0	461.0	0.0	0.0	0.0	0.0
OTU853678434	Bacteria; Chloroflexi; Anaerolineae; Anaerolineales; Anaerolineaceae; uncultured; uncultured Chloroflexi bacterium	0.0	0.0	0.0	1.0	0.0	0.0	0.0	0.0	0.0	1.0	0.0	0.0	0.0	0.0	0.0	0.0	0.0	87.0	69.0	38.0	188.0	297.0	180.0	112.0	0.0	0.0	0.0	0.0
OTU766437765	Bacteria; Chloroflexi; Anaerolineae; Anaerolineales; Anaerolineaceae; uncultured; uncultured organism	0.0	4.0	1.0	0.0	0.0	0.0	0.0	0.0	0.0	0.0	0.0	0.0	0.0	0.0	0.0	0.0	0.0	80.0	89.0	255.0	83.0	1861.0	797.0	691.0	0.0	0.0	0.0	0.0
OTU11484290	Bacteria; Spirochaetae; Spirochaetes; Spirochaetales; Leptospiraceae; uncultured; uncultured Spirochaetales bacterium	4.0	2.0	0.0	0.0	31.0	30.0	4582.0	192.0	10964.0	110.0	137.0	0.0	0.0	1.0	0.0	0.0	0.0	0.0	0.0	0.0	0.0	0.0	0.0	0.0	0.0	0.0	0.0	0.0
OTU995410483	Bacteria; Chloroflexi; SBR2076; uncultured bacterium; uncultured bacterium; uncultured bacterium; uncultured bacterium	0.0	0.0	1.0	0.0	0.0	0.0	0.0	0.0	0.0	0.0	0.0	0.0	0.0	0.0	0.0	0.0	0.0	0.0	0.0	3.0	3.0	0.0	100.0	56.0	0.0	0.0	0.0	0.0
OTU604025876	Bacteria; Planctomycetes; OM190; uncultured planctomycete; uncultured planctomycete; uncultured planctomycete; uncultured planctomycete	0.0	0.0	0.0	0.0	0.0	0.0	0.0	0.0	0.0	0.0	0.0	0.0	0.0	0.0	0.0	0.0	0.0	9.0	15.0	38.0	92.0	182.0	33.0	26.0	0.0	0.0	0.0	0.0
OTU916219106	Bacteria; Proteobacteria; Betaproteobacteria; Rhodocyclales; Rhodocyclaceae; uncultured; uncultured bacterium	0.0	0.0	1.0	0.0	172.0	114.0	394.0	125.0	2825.0	8.0	32.0	0.0	0.0	0.0	1.0	0.0	1.0	0.0	0.0	0.0	0.0	0.0	0.0	0.0	0.0	0.0	0.0	0.0
OTU414482717	Archaea; Miscellaneous Euryarchaeotic Group(MEG); uncultured euryarchaeote; uncultured euryarchaeote; uncultured euryarchaeote; uncultured euryarchaeote; uncultured euryarchaeote	0.0	0.0	1.0	0.0	0.0	0.0	0.0	0.0	0.0	7.0	3.0	0.0	0.0	0.0	0.0	0.0	0.0	9.0	18.0	60.0	321.0	392.0	133.0	186.0	0.0	0.0	0.0	0.0
OTU966213470	Bacteria; Proteobacteria; Deltaproteobacteria; Sva0485; uncultured bacterium; uncultured bacterium; uncultured bacterium	0.0	2.0	0.0	0.0	0.0	0.0	0.0	0.0	0.0	0.0	0.0	0.0	0.0	0.0	0.0	0.0	0.0	51.0	51.0	45.0	300.0	196.0	16.0	17.0	0.0	0.0	0.0	0.0
OTU948720062	Bacteria; Chloroflexi; Anaerolineae; Anaerolineales; Anaerolineaceae; uncultured; uncultured bacterium	0.0	3.0	1.0	0.0	0.0	0.0	0.0	0.0	0.0	2.0	3.0	0.0	0.0	0.0	0.0	0.0	0.0	0.0	2.0	3.0	4.0	153.0	7.0	13.0	0.0	0.0	0.0	0.0
OTU197894627	Bacteria; Aminicenantes; uncultured bacterium; uncultured bacterium; uncultured bacterium; uncultured bacterium; uncultured bacterium	0.0	0.0	0.0	0.0	0.0	0.0	0.0	0.0	0.0	0.0	0.0	0.0	0.0	0.0	0.0	0.0	0.0	79.0	109.0	56.0	188.0	285.0	83.0	70.0	0.0	0.0	0.0	0.0
OTU948138299	Bacteria; AC1; Ambiguous_taxa; Ambiguous_taxa; Ambiguous_taxa; Ambiguous_taxa; Ambiguous_taxa	0.0	0.0	0.0	0.0	0.0	0.0	0.0	0.0	0.0	0.0	0.0	0.0	0.0	0.0	0.0	0.0	0.0	16.0	13.0	34.0	111.0	176.0	23.0	23.0	0.0	0.0	0.0	0.0
OTU176103209	Bacteria; Nitrospirae; Nitrospira; Nitrospirales; Nitrospiraceae; uncultured; uncultured Nitrospirae bacterium	0.0	5.0	1.0	2.0	0.0	0.0	0.0	0.0	0.0	0.0	0.0	0.0	0.0	2.0	0.0	0.0	0.0	656.0	550.0	324.0	997.0	1094.0	171.0	65.0	0.0	0.0	0.0	0.0
OTU422233492	Bacteria; Proteobacteria; Deltaproteobacteria; Sva0485	0.0	3.0	2.0	1.0	0.0	0.0	0.0	0.0	1.0	0.0	0.0	0.0	0.0	0.0	0.0	0.0	0.0	50.0	53.0	53.0	244.0	164.0	91.0	46.0	0.0	0.0	0.0	0.0
OTU862011	Bacteria; Deferribacteres; Deferribacteres Incertae Sedis; Unknown Order; Unknown Family; Caldithrix; uncultured bacterium	0.0	0.0	0.0	1.0	0.0	0.0	0.0	0.0	0.0	0.0	0.0	0.0	0.0	0.0	0.0	0.0	0.0	205.0	188.0	344.0	582.0	1149.0	374.0	232.0	0.0	0.0	0.0	0.0
OTU866133195	Bacteria; Nitrospirae; Nitrospira; Nitrospirales; Nitrospiraceae; uncultured; uncultured bacterium	0.0	3.0	0.0	1.0	0.0	0.0	0.0	0.0	0.0	1.0	0.0	0.0	0.0	1.0	0.0	0.0	0.0	18.0	10.0	110.0	373.0	264.0	141.0	183.0	0.0	0.0	0.0	0.0
OTU625054475	Bacteria; Proteobacteria; Alphaproteobacteria; Caulobacterales; Hyphomonadaceae; Woodsholea; uncultured bacterium	0.0	0.0	0.0	0.0	0.0	0.0	0.0	0.0	3.0	0.0	0.0	0.0	0.0	0.0	0.0	1.0	0.0	0.0	0.0	0.0	0.0	0.0	8.0	9.0	11400.0	15496.0	649.0	1054.0
OTU82432178	Bacteria; Deferribacteres; Deferribacteres Incertae Sedis; Unknown Order; Unknown Family; Caldithrix; uncultured bacterium	0.0	0.0	0.0	0.0	0.0	0.0	0.0	0.0	0.0	0.0	0.0	0.0	0.0	0.0	0.0	0.0	0.0	5.0	1.0	13.0	71.0	38.0	5.0	1.0	0.0	0.0	0.0	0.0
OTU231845455	Unassigned	0.0	0.0	0.0	0.0	0.0	0.0	0.0	0.0	0.0	0.0	0.0	0.0	0.0	0.0	0.0	0.0	0.0	42.0	27.0	60.0	147.0	341.0	88.0	64.0	0.0	0.0	0.0	0.0
OTU169566056	Bacteria; Proteobacteria; Alphaproteobacteria; Sphingomonadales; Sphingomonadaceae; Sphingomonas	0.0	4.0	1.0	6.0	0.0	0.0	0.0	0.0	0.0	0.0	0.0	0.0	2.0	0.0	0.0	0.0	0.0	0.0	0.0	0.0	1.0	1.0	0.0	0.0	217.0	130.0	20.0	9.0
OTU698604378	Bacteria; Planctomycetes; Phycisphaerae; Phycisphaerales; 08D2Z94 hypersaline microbial mat group; uncultured organism; uncultured organism	0.0	0.0	0.0	0.0	0.0	0.0	0.0	0.0	0.0	0.0	0.0	0.0	0.0	0.0	0.0	0.0	0.0	13.0	7.0	27.0	45.0	112.0	44.0	34.0	0.0	0.0	0.0	0.0
OTU925198147	Bacteria; Proteobacteria; Deltaproteobacteria; Syntrophobacterales; Syntrophaceae; Desulfobacca; uncultured delta proteobacterium	0.0	1.0	0.0	0.0	0.0	0.0	0.0	0.0	0.0	0.0	0.0	0.0	0.0	0.0	0.0	0.0	0.0	14.0	16.0	7.0	15.0	106.0	12.0	10.0	1.0	0.0	0.0	0.0
OTU279149069	Bacteria; Chloroflexi; Anaerolineae; Anaerolineales; Anaerolineaceae; uncultured; uncultured bacterium	2.0	2.0	6.0	5.0	0.0	0.0	0.0	0.0	1.0	32.0	28.0	0.0	0.0	0.0	0.0	0.0	0.0	103.0	165.0	53.0	225.0	306.0	170.0	142.0	0.0	0.0	0.0	0.0
OTU449530746	Bacteria; Planctomycetes; vadinHA49; uncultured bacterium; uncultured bacterium; uncultured bacterium; uncultured bacterium	0.0	0.0	0.0	0.0	0.0	0.0	0.0	0.0	0.0	0.0	0.0	0.0	0.0	0.0	0.0	0.0	0.0	5.0	5.0	10.0	44.0	66.0	16.0	16.0	0.0	0.0	0.0	0.0
OTU983089476	Bacteria; Bacteroidetes; Flavobacteriia; Flavobacteriales; Flavobacteriaceae; Flavobacterium; Ambiguous_taxa	5.0	17.0	7.0	4.0	0.0	0.0	0.0	0.0	0.0	3.0	1.0	1072.0	87.0	49.0	2.0	1.0	0.0	10.0	3.0	7.0	92.0	8.0	175.0	138.0	0.0	0.0	0.0	0.0
OTU564811743	Bacteria; TA06; uncultured bacterium; uncultured bacterium; uncultured bacterium; uncultured bacterium; uncultured bacterium	0.0	1.0	0.0	0.0	0.0	0.0	0.0	0.0	0.0	0.0	0.0	0.0	0.0	0.0	0.0	0.0	0.0	10.0	13.0	11.0	31.0	25.0	9.0	13.0	0.0	0.0	0.0	0.0
OTU938736962	Unassigned	0.0	0.0	0.0	0.0	0.0	0.0	0.0	0.0	0.0	0.0	0.0	0.0	0.0	0.0	0.0	0.0	0.0	23.0	8.0	38.0	118.0	103.0	28.0	15.0	0.0	0.0	0.0	0.0
OTU728823610	Bacteria; Chloroflexi; uncultured; uncultured Chloroflexi bacterium; uncultured Chloroflexi bacterium; uncultured Chloroflexi bacterium; uncultured Chloroflexi bacterium	0.0	1.0	0.0	0.0	0.0	0.0	0.0	0.0	0.0	0.0	0.0	0.0	0.0	0.0	0.0	0.0	0.0	199.0	147.0	151.0	530.0	754.0	207.0	131.0	0.0	0.0	0.0	0.0
OTU600270359	Bacteria; Proteobacteria; Deltaproteobacteria; Desulfobacterales; Desulfobacteraceae; Sva0081 sediment group	0.0	0.0	0.0	0.0	0.0	0.0	0.0	0.0	0.0	0.0	0.0	0.0	0.0	0.0	0.0	0.0	0.0	3.0	5.0	14.0	44.0	27.0	12.0	8.0	0.0	0.0	0.0	0.0
OTU950678273	Archaea; Euryarchaeota; Methanomicrobia; ANME-1; ANME-1a; Ambiguous_taxa; Ambiguous_taxa	0.0	1.0	0.0	1.0	0.0	0.0	0.0	0.0	0.0	0.0	0.0	0.0	0.0	0.0	0.0	0.0	0.0	13.0	20.0	86.0	387.0	653.0	106.0	110.0	0.0	0.0	0.0	0.0
OTU128782588	Unassigned	0.0	0.0	0.0	0.0	1.0	0.0	35.0	155.0	87.0	4.0	2.0	0.0	0.0	0.0	0.0	0.0	0.0	0.0	0.0	0.0	0.0	0.0	0.0	0.0	0.0	0.0	0.0	0.0
OTU840378082	Bacteria; Proteobacteria; Deltaproteobacteria; Desulfobacterales; Desulfobulbaceae; Dissulfurimicrobium	0.0	0.0	0.0	0.0	8.0	0.0	23.0	387.0	214.0	10.0	10.0	0.0	0.0	0.0	0.0	0.0	0.0	0.0	0.0	0.0	0.0	0.0	0.0	0.0	0.0	0.0	0.0	0.0
OTU335301704	Unassigned	0.0	0.0	0.0	0.0	0.0	0.0	0.0	0.0	0.0	0.0	0.0	0.0	0.0	0.0	0.0	0.0	0.0	51.0	44.0	97.0	456.0	274.0	48.0	37.0	0.0	0.0	0.0	0.0
OTU19616209	Bacteria; PAUC34f; uncultured bacterium; uncultured bacterium; uncultured bacterium; uncultured bacterium; uncultured bacterium	0.0	2.0	2.0	0.0	0.0	0.0	0.0	0.0	0.0	0.0	0.0	0.0	0.0	0.0	0.0	0.0	0.0	10.0	20.0	90.0	314.0	165.0	22.0	26.0	0.0	0.0	0.0	0.0
OTU338736982	Archaea; Bathyarchaeota; Ambiguous_taxa; Ambiguous_taxa; Ambiguous_taxa; Ambiguous_taxa; Ambiguous_taxa	0.0	3.0	0.0	0.0	0.0	0.0	0.0	0.0	0.0	0.0	0.0	0.0	0.0	0.0	0.0	0.0	0.0	10.0	12.0	24.0	114.0	186.0	19.0	26.0	0.0	0.0	0.0	0.0
OTU717275009	Archaea; Bathyarchaeota; uncultured archaeon; uncultured archaeon; uncultured archaeon; uncultured archaeon; uncultured archaeon	0.0	0.0	0.0	0.0	0.0	0.0	0.0	0.0	0.0	0.0	0.0	0.0	0.0	0.0	0.0	0.0	0.0	3.0	3.0	4.0	24.0	64.0	3.0	9.0	0.0	0.0	0.0	0.0
OTU94402556	Bacteria; Acidobacteria; Holophagae; Subgroup 23; uncultured bacterium; uncultured bacterium; uncultured bacterium	0.0	0.0	1.0	0.0	0.0	0.0	0.0	0.0	0.0	1.0	0.0	0.0	0.0	0.0	0.0	0.0	0.0	14.0	13.0	38.0	87.0	205.0	31.0	24.0	0.0	0.0	0.0	0.0
OTU119323785	Bacteria; Proteobacteria; Deltaproteobacteria; Sva0485; uncultured bacterium; uncultured bacterium; uncultured bacterium	0.0	1.0	0.0	0.0	0.0	0.0	0.0	0.0	0.0	0.0	0.0	0.0	0.0	0.0	0.0	0.0	0.0	92.0	81.0	61.0	187.0	221.0	79.0	60.0	0.0	0.0	0.0	0.0
OTU900011026	Bacteria; Proteobacteria; Deltaproteobacteria; Sva0485	0.0	0.0	0.0	0.0	0.0	0.0	0.0	0.0	0.0	0.0	0.0	0.0	0.0	0.0	0.0	0.0	0.0	74.0	54.0	61.0	342.0	272.0	32.0	17.0	0.0	0.0	0.0	0.0
OTU75404697	Archaea; Euryarchaeota; Thermoplasmata; Thermoplasmatales; Marine Benthic Group D and DHVEG-1; Ambiguous_taxa; Ambiguous_taxa	0.0	4.0	2.0	1.0	0.0	0.0	0.0	0.0	0.0	0.0	3.0	0.0	0.0	0.0	0.0	0.0	0.0	46.0	56.0	37.0	222.0	303.0	53.0	71.0	0.0	0.0	0.0	0.0
OTU155427420	Bacteria; Chlorobi; Chlorobia; Chlorobiales; SJA-28; uncultured bacterium; uncultured bacterium	0.0	0.0	0.0	0.0	0.0	0.0	0.0	0.0	0.0	0.0	0.0	0.0	0.0	0.0	0.0	0.0	0.0	16.0	23.0	43.0	168.0	239.0	132.0	103.0	0.0	0.0	0.0	0.0
OTU670089551	Bacteria; Chloroflexi; Dehalococcoidia; GIF9; uncultured bacterium; uncultured bacterium; uncultured bacterium	0.0	0.0	0.0	0.0	0.0	0.0	0.0	0.0	0.0	0.0	0.0	0.0	0.0	0.0	0.0	0.0	0.0	44.0	54.0	81.0	267.0	436.0	37.0	41.0	0.0	0.0	0.0	0.0
OTU181087822	Bacteria; Chloroflexi; Anaerolineae; Anaerolineales; Anaerolineaceae; uncultured; uncultured bacterium	0.0	0.0	0.0	0.0	2.0	0.0	0.0	2.0	8.0	13.0	18.0	0.0	0.0	0.0	0.0	0.0	0.0	37.0	36.0	31.0	136.0	159.0	25.0	19.0	0.0	0.0	0.0	0.0
OTU444694934	Unassigned	0.0	0.0	1.0	3.0	0.0	0.0	0.0	0.0	0.0	0.0	0.0	0.0	0.0	0.0	0.0	0.0	0.0	17.0	14.0	119.0	224.0	1134.0	985.0	588.0	0.0	0.0	0.0	0.0
OTU527241226	Bacteria; Proteobacteria; Deltaproteobacteria; Desulfurellales; Desulfurellaceae; G55; uncultured bacterium	0.0	0.0	0.0	0.0	0.0	0.0	0.0	0.0	0.0	0.0	0.0	0.0	0.0	0.0	0.0	0.0	0.0	0.0	0.0	0.0	0.0	0.0	4.0	1.0	227.0	150.0	87.0	94.0
OTU862807608	Bacteria; Chloroflexi; uncultured; uncultured Chloroflexi bacterium; uncultured Chloroflexi bacterium; uncultured Chloroflexi bacterium; uncultured Chloroflexi bacterium	0.0	0.0	0.0	0.0	0.0	0.0	0.0	0.0	0.0	0.0	0.0	0.0	0.0	0.0	0.0	0.0	0.0	17.0	12.0	31.0	59.0	218.0	23.0	13.0	0.0	0.0	0.0	0.0
OTU189152383	Bacteria; AC1; uncultured bacterium; uncultured bacterium; uncultured bacterium; uncultured bacterium; uncultured bacterium	0.0	0.0	0.0	0.0	0.0	0.0	0.0	0.0	0.0	0.0	0.0	0.0	0.0	0.0	0.0	0.0	0.0	0.0	5.0	19.0	157.0	257.0	6.0	10.0	0.0	0.0	0.0	0.0
OTU340846214	Bacteria; Latescibacteria; uncultured bacterium; uncultured bacterium; uncultured bacterium; uncultured bacterium; uncultured bacterium	0.0	0.0	0.0	0.0	6.0	9.0	24.0	259.0	198.0	85.0	42.0	0.0	0.0	0.0	0.0	0.0	0.0	0.0	0.0	0.0	0.0	0.0	0.0	0.0	0.0	0.0	0.0	0.0
OTU243089735	Bacteria; Proteobacteria; Alphaproteobacteria; Caulobacterales; Caulobacteraceae; Phenylobacterium; uncultured bacterium	0.0	0.0	0.0	1.0	17.0	32.0	46.0	70.0	130.0	3.0	6.0	0.0	0.0	0.0	0.0	0.0	0.0	0.0	0.0	0.0	2.0	0.0	0.0	0.0	0.0	0.0	0.0	1.0
OTU677825198	Bacteria; Deferribacteres; Deferribacteres Incertae Sedis; Unknown Order; Unknown Family; Caldithrix; uncultured bacterium	0.0	0.0	0.0	0.0	0.0	0.0	0.0	0.0	0.0	0.0	3.0	0.0	0.0	0.0	0.0	0.0	0.0	9.0	10.0	25.0	50.0	62.0	15.0	20.0	0.0	0.0	0.0	0.0
OTU258997562	Bacteria; AC1; uncultured bacterium; uncultured bacterium; uncultured bacterium; uncultured bacterium; uncultured bacterium	0.0	0.0	0.0	0.0	0.0	0.0	0.0	0.0	0.0	0.0	0.0	0.0	0.0	0.0	0.0	0.0	0.0	10.0	13.0	23.0	92.0	166.0	46.0	39.0	0.0	0.0	0.0	0.0
OTU202049540	Bacteria; Chloroflexi; Anaerolineae; Anaerolineales; Anaerolineaceae; uncultured	0.0	0.0	0.0	0.0	0.0	0.0	0.0	0.0	0.0	0.0	0.0	0.0	0.0	0.0	0.0	0.0	0.0	15.0	9.0	21.0	72.0	100.0	55.0	33.0	0.0	0.0	0.0	0.0
OTU642553576	Bacteria; Proteobacteria; Alphaproteobacteria; Rhizobiales; Methylobacteriaceae; Methylobacterium; Ambiguous_taxa	0.0	38.0	13.0	593.0	0.0	0.0	0.0	0.0	0.0	0.0	0.0	0.0	0.0	0.0	4.0	42.0	36.0	0.0	0.0	0.0	0.0	1.0	0.0	0.0	0.0	0.0	0.0	0.0
OTU84662634	Bacteria; Proteobacteria; Alphaproteobacteria; Alphaproteobacteria Incertae Sedis; uncultured; uncultured bacterium; uncultured bacterium	0.0	0.0	0.0	0.0	1713.0	1247.0	575.0	3278.0	2850.0	106.0	160.0	0.0	0.0	0.0	0.0	0.0	0.0	0.0	0.0	0.0	0.0	1.0	0.0	0.0	0.0	0.0	0.0	0.0
OTU237350243	Bacteria; Proteobacteria; Alphaproteobacteria; Rhodospirillales	0.0	0.0	0.0	0.0	0.0	0.0	0.0	0.0	0.0	0.0	0.0	0.0	0.0	0.0	0.0	0.0	0.0	0.0	0.0	0.0	0.0	0.0	0.0	3.0	154.0	71.0	55.0	68.0
OTU88969512	Bacteria; Verrucomicrobia; OPB35 soil group; uncultured bacterium; uncultured bacterium; uncultured bacterium; uncultured bacterium	0.0	0.0	0.0	0.0	0.0	0.0	0.0	0.0	0.0	1.0	1.0	0.0	0.0	0.0	0.0	0.0	0.0	0.0	0.0	0.0	2.0	0.0	4.0	3.0	391.0	49.0	190.0	532.0
OTU122508582	Unassigned	0.0	0.0	0.0	0.0	22.0	14.0	14.0	112.0	63.0	0.0	1.0	0.0	0.0	0.0	0.0	0.0	0.0	0.0	0.0	0.0	0.0	0.0	0.0	0.0	0.0	0.0	0.0	0.0
OTU94246535	Bacteria; SR1 (Absconditabacteria)	0.0	1.0	1.0	0.0	1.0	0.0	39.0	436.0	539.0	11.0	19.0	0.0	0.0	0.0	0.0	0.0	0.0	0.0	0.0	0.0	0.0	0.0	0.0	0.0	0.0	0.0	0.0	0.0
OTU672148493	Bacteria; Firmicutes; Clostridia; Clostridiales; Ruminococcaceae; Candidatus Soleaferrea	0.0	0.0	0.0	0.0	122.0	171.0	1.0	690.0	217.0	8.0	8.0	0.0	0.0	0.0	0.0	0.0	0.0	0.0	0.0	0.0	0.0	0.0	0.0	0.0	0.0	0.0	0.0	0.0
OTU813291517	Bacteria; Proteobacteria; Alphaproteobacteria; Rhodospirillales; KCM-B-15; uncultured bacterium; uncultured bacterium	0.0	0.0	0.0	0.0	0.0	0.0	0.0	0.0	0.0	0.0	0.0	0.0	0.0	0.0	0.0	0.0	0.0	0.0	0.0	0.0	0.0	0.0	1.0	1.0	165.0	27.0	98.0	81.0
OTU910333932	Unassigned	0.0	0.0	0.0	0.0	0.0	0.0	0.0	0.0	0.0	0.0	0.0	0.0	0.0	0.0	0.0	0.0	0.0	1.0	0.0	2.0	17.0	52.0	52.0	49.0	0.0	0.0	0.0	0.0
OTU756206007	Bacteria; Bacteroidetes; Bacteroidia; Bacteroidales; Rikenellaceae; vadinBC27 wastewater-sludge group; uncultured bacterium	0.0	0.0	0.0	0.0	1.0	0.0	4.0	146.0	18.0	3.0	5.0	0.0	0.0	0.0	0.0	0.0	0.0	0.0	0.0	0.0	0.0	0.0	0.0	0.0	0.0	0.0	0.0	0.0
OTU84581611	Bacteria; Aminicenantes; uncultured bacterium; uncultured bacterium; uncultured bacterium; uncultured bacterium; uncultured bacterium	0.0	0.0	0.0	0.0	0.0	0.0	0.0	0.0	0.0	0.0	0.0	0.0	0.0	0.0	0.0	1.0	0.0	17.0	6.0	44.0	123.0	217.0	82.0	59.0	0.0	0.0	0.0	0.0
OTU169599206	Unassigned	0.0	0.0	0.0	0.0	0.0	0.0	0.0	0.0	0.0	0.0	0.0	0.0	0.0	0.0	0.0	1.0	1.0	0.0	0.0	0.0	0.0	0.0	5.0	5.0	6096.0	4467.0	253.0	574.0
OTU461112886	Bacteria; Bacteroidetes; Bacteroidia; Bacteroidales; Porphyromonadaceae; Paludibacter; uncultured bacterium	0.0	0.0	0.0	0.0	49.0	24.0	141.0	13345.0	1682.0	329.0	187.0	0.0	0.0	0.0	0.0	0.0	0.0	0.0	0.0	0.0	0.0	1.0	0.0	0.0	0.0	0.0	0.0	0.0
OTU337601412	Bacteria; Chloroflexi; SBR2076; uncultured bacterium; uncultured bacterium; uncultured bacterium; uncultured bacterium	0.0	0.0	2.0	0.0	0.0	0.0	0.0	0.0	0.0	0.0	0.0	0.0	0.0	0.0	0.0	0.0	0.0	18.0	18.0	43.0	72.0	149.0	56.0	47.0	0.0	0.0	0.0	0.0
OTU616490608	Bacteria; Spirochaetae; Spirochaetes; Spirochaetales; Spirochaetaceae; uncultured; uncultured organism	0.0	1.0	0.0	0.0	0.0	0.0	0.0	0.0	0.0	0.0	0.0	0.0	0.0	0.0	0.0	0.0	0.0	9.0	18.0	13.0	33.0	63.0	12.0	14.0	0.0	0.0	0.0	0.0
OTU164591796	Bacteria; Proteobacteria; Betaproteobacteria; B1-7BS; uncultured bacterium; uncultured bacterium; uncultured bacterium	0.0	0.0	0.0	1.0	0.0	0.0	0.0	0.0	0.0	0.0	0.0	0.0	0.0	0.0	0.0	1.0	0.0	0.0	0.0	0.0	0.0	0.0	3.0	2.0	1079.0	1115.0	129.0	347.0
OTU6025973	Bacteria; Bacteroidetes; Bacteroidia; Bacteroidales; Porphyromonadaceae; Paludibacter; uncultured bacterium	0.0	1.0	0.0	0.0	0.0	0.0	121.0	1361.0	758.0	3.0	3.0	0.0	0.0	0.0	0.0	0.0	0.0	0.0	0.0	0.0	0.0	0.0	1.0	0.0	0.0	0.0	0.0	0.0
OTU940783705	Archaea; Euryarchaeota; Methanomicrobia; ANME-1; ANME-1b; uncultured archaeon; uncultured archaeon	0.0	0.0	0.0	0.0	0.0	0.0	0.0	0.0	0.0	0.0	0.0	0.0	0.0	0.0	0.0	0.0	0.0	10.0	8.0	17.0	45.0	322.0	25.0	97.0	0.0	0.0	0.0	0.0
OTU176255564	Bacteria; Chloroflexi; Anaerolineae; Anaerolineales; Anaerolineaceae; uncultured; Ambiguous_taxa	0.0	0.0	0.0	0.0	0.0	0.0	0.0	0.0	0.0	0.0	0.0	0.0	0.0	0.0	0.0	0.0	0.0	0.0	0.0	0.0	0.0	0.0	0.0	0.0	289.0	0.0	0.0	8.0
OTU491092665	Bacteria; Chloroflexi; Dehalococcoidia; Dehalococcoidales; uncultured	0.0	0.0	0.0	0.0	0.0	0.0	0.0	0.0	0.0	0.0	0.0	0.0	0.0	0.0	0.0	0.0	0.0	12.0	27.0	15.0	87.0	65.0	8.0	10.0	0.0	0.0	0.0	0.0
OTU276174621	Bacteria; Spirochaetae; Spirochaetes; Spirochaetales; Spirochaetaceae; Spirochaeta 2; uncultured bacterium	0.0	0.0	0.0	0.0	0.0	0.0	0.0	0.0	0.0	0.0	0.0	0.0	0.0	0.0	0.0	0.0	0.0	18.0	26.0	25.0	57.0	112.0	13.0	26.0	0.0	0.0	0.0	0.0
OTU696044601	Bacteria; Proteobacteria; Alphaproteobacteria; Rhizobiales; Bradyrhizobiaceae; Bosea; Ambiguous_taxa	0.0	0.0	0.0	0.0	0.0	0.0	2.0	0.0	0.0	0.0	0.0	0.0	0.0	0.0	168.0	228.0	346.0	0.0	0.0	0.0	0.0	0.0	0.0	0.0	33.0	11.0	2.0	5.0
OTU22862546	Bacteria; Proteobacteria; Gammaproteobacteria; Chromatiales; Chromatiaceae; Rheinheimera	0.0	231.0	26.0	9.0	0.0	0.0	0.0	0.0	0.0	1.0	0.0	0.0	0.0	77.0	0.0	0.0	0.0	2.0	4.0	1.0	947.0	25.0	429.0	315.0	0.0	0.0	0.0	0.0
OTU673559194	Bacteria; Proteobacteria; Gammaproteobacteria; Pseudomonadales; Pseudomonadaceae; Pseudomonas	0.0	74.0	4064.0	256.0	0.0	0.0	0.0	0.0	0.0	0.0	0.0	0.0	0.0	179.0	13.0	2.0	0.0	0.0	0.0	0.0	0.0	0.0	0.0	0.0	0.0	0.0	0.0	0.0
OTU19304738	Bacteria; Proteobacteria; Gammaproteobacteria; Enterobacteriales; Enterobacteriaceae; Raoultella	0.0	928.0	305.0	75.0	0.0	0.0	0.0	0.0	0.0	0.0	0.0	0.0	0.0	2.0	0.0	0.0	0.0	0.0	0.0	0.0	0.0	0.0	0.0	0.0	0.0	0.0	0.0	0.0
OTU330259257	Bacteria; Proteobacteria; Betaproteobacteria; Burkholderiales; Comamonadaceae; Delftia	0.0	0.0	0.0	0.0	1.0	7.0	0.0	0.0	0.0	0.0	0.0	0.0	0.0	3.0	1119.0	699.0	453.0	0.0	0.0	0.0	0.0	0.0	0.0	0.0	0.0	0.0	0.0	0.0
OTU507394517	Bacteria; Bacteroidetes; Bacteroidia; Bacteroidia Incertae Sedis; Draconibacteriaceae; uncultured; uncultured bacterium	0.0	1.0	1.0	1.0	27.0	26.0	105.0	879.0	766.0	49.0	158.0	0.0	0.0	2.0	0.0	0.0	1.0	4.0	2.0	0.0	2.0	0.0	0.0	0.0	0.0	0.0	0.0	0.0
OTU120576032	Bacteria; Chlorobi; Chlorobia; Chlorobiales; SJA-28; uncultured bacterium; uncultured bacterium	0.0	0.0	0.0	0.0	6.0	2.0	36.0	795.0	240.0	204.0	208.0	0.0	0.0	0.0	0.0	0.0	0.0	0.0	0.0	0.0	0.0	0.0	0.0	0.0	0.0	0.0	0.0	0.0
OTU46426474	Bacteria; Proteobacteria; Epsilonproteobacteria; Campylobacterales; Helicobacteraceae; Sulfurimonas; uncultured bacterium	18.0	1.0	1.0	0.0	0.0	0.0	0.0	0.0	0.0	0.0	5.0	0.0	5.0	19.0	1.0	5.0	2.0	26.0	24.0	7.0	46.0	7.0	1.0	0.0	0.0	0.0	0.0	0.0
OTU480117831	Unassigned	0.0	0.0	0.0	0.0	0.0	0.0	0.0	0.0	0.0	158.0	154.0	0.0	0.0	0.0	0.0	0.0	0.0	1.0	0.0	0.0	0.0	0.0	0.0	0.0	0.0	0.0	0.0	0.0
OTU721997045	Bacteria; Bacteroidetes; Bacteroidetes BD2-2	0.0	2.0	0.0	0.0	0.0	0.0	0.0	0.0	0.0	0.0	0.0	0.0	0.0	0.0	0.0	0.0	0.0	9.0	15.0	21.0	54.0	109.0	6.0	11.0	0.0	0.0	0.0	0.0
OTU889561337	Bacteria; Chloroflexi; Ardenticatenia; uncultured; uncultured bacterium; uncultured bacterium; uncultured bacterium	0.0	0.0	0.0	0.0	0.0	0.0	0.0	0.0	0.0	0.0	0.0	0.0	0.0	0.0	0.0	0.0	0.0	0.0	0.0	0.0	0.0	0.0	0.0	0.0	225.0	0.0	0.0	17.0
OTU308759571	Bacteria; Planctomycetes; BD7-11	0.0	0.0	0.0	0.0	0.0	0.0	0.0	0.0	0.0	0.0	0.0	0.0	0.0	0.0	0.0	0.0	0.0	0.0	0.0	0.0	0.0	0.0	0.0	0.0	150.0	68.0	73.0	52.0
OTU368501381	Bacteria; Proteobacteria; Alphaproteobacteria; Rhodospirillales; Rhodospirillaceae; Rhodocista sp. SCSIO 13435; Rhodocista sp. SCSIO 13435	0.0	0.0	0.0	0.0	0.0	0.0	0.0	0.0	0.0	0.0	0.0	0.0	0.0	0.0	0.0	1.0	0.0	0.0	0.0	0.0	0.0	0.0	8.0	7.0	271.0	118.0	349.0	606.0
OTU580506563	Bacteria; Proteobacteria; Alphaproteobacteria; Rhodospirillales; Rhodospirillaceae; uncultured; uncultured bacterium	0.0	1.0	0.0	0.0	3.0	2.0	65.0	495.0	418.0	4.0	19.0	0.0	0.0	0.0	0.0	0.0	0.0	0.0	0.0	0.0	0.0	0.0	0.0	0.0	0.0	0.0	0.0	0.0
OTU400599899	Bacteria; Proteobacteria; Alphaproteobacteria; Caulobacterales; Hyphomonadaceae; Woodsholea; uncultured bacterium	0.0	0.0	0.0	0.0	0.0	0.0	0.0	0.0	0.0	0.0	1.0	0.0	0.0	0.0	0.0	0.0	0.0	0.0	0.0	0.0	0.0	0.0	3.0	0.0	182.0	119.0	53.0	30.0
OTU567285719	Archaea; Bathyarchaeota	0.0	0.0	1.0	1.0	0.0	0.0	0.0	0.0	0.0	0.0	0.0	0.0	0.0	0.0	0.0	0.0	0.0	13.0	8.0	21.0	53.0	145.0	23.0	59.0	0.0	0.0	0.0	0.0
OTU20671515	Bacteria; Spirochaetae; Spirochaetes; Spirochaetales; Leptospiraceae; Turneriella	0.0	0.0	0.0	0.0	115.0	127.0	5.0	57.0	65.0	17.0	16.0	0.0	0.0	0.0	0.0	0.0	0.0	0.0	0.0	0.0	7.0	0.0	0.0	0.0	0.0	0.0	0.0	0.0
OTU252920903	Bacteria; Planctomycetes; Planctomycetacia; Planctomycetales; Planctomycetaceae; uncultured; uncultured bacterium	0.0	0.0	0.0	1.0	0.0	0.0	0.0	0.0	0.0	0.0	0.0	0.0	0.0	0.0	0.0	3.0	0.0	0.0	0.0	0.0	0.0	0.0	0.0	2.0	93.0	119.0	21.0	101.0
OTU372744155	Bacteria; Proteobacteria; Gammaproteobacteria; Methylococcales; Methylococcaceae	0.0	0.0	0.0	0.0	0.0	0.0	0.0	0.0	0.0	0.0	0.0	0.0	0.0	0.0	0.0	1.0	0.0	0.0	0.0	0.0	0.0	0.0	33.0	28.0	0.0	0.0	1618.0	1958.0
OTU857101125	Bacteria; Parcubacteria; Candidatus Azambacteria	0.0	0.0	1.0	0.0	1.0	0.0	25.0	125.0	278.0	24.0	30.0	0.0	0.0	0.0	0.0	0.0	0.0	0.0	0.0	0.0	0.0	0.0	0.0	0.0	0.0	0.0	0.0	0.0
OTU188328047	Bacteria; Firmicutes; Erysipelotrichia; Erysipelotrichales; Erysipelotrichaceae; Erysipelothrix; uncultured bacterium	384.0	246.0	207.0	67.0	0.0	0.0	0.0	0.0	0.0	0.0	0.0	1453.0	1498.0	182.0	6.0	62.0	16.0	1.0	1.0	0.0	0.0	0.0	1.0	0.0	0.0	0.0	0.0	0.0
OTU444143845	Bacteria; Proteobacteria; Betaproteobacteria; Nitrosomonadales; Nitrosomonadaceae; uncultured; uncultured bacterium	0.0	0.0	0.0	0.0	0.0	0.0	0.0	0.0	0.0	0.0	0.0	0.0	0.0	0.0	0.0	2.0	0.0	0.0	0.0	0.0	0.0	0.0	0.0	2.0	184.0	29.0	92.0	110.0
OTU241713183	Bacteria; Actinobacteria; Thermoleophilia; Gaiellales; uncultured; uncultured bacterium; uncultured bacterium	0.0	0.0	0.0	0.0	0.0	0.0	0.0	0.0	0.0	0.0	0.0	0.0	0.0	1.0	0.0	1.0	0.0	0.0	0.0	0.0	0.0	0.0	0.0	0.0	48.0	55.0	4.0	8.0
OTU567572329	Unassigned	0.0	0.0	0.0	0.0	16.0	15.0	28.0	148.0	186.0	37.0	74.0	0.0	0.0	0.0	0.0	0.0	0.0	0.0	0.0	0.0	0.0	0.0	0.0	0.0	0.0	0.0	0.0	0.0
OTU210569458	Unassigned	0.0	0.0	0.0	0.0	0.0	0.0	10.0	95.0	92.0	2.0	1.0	0.0	0.0	0.0	0.0	0.0	0.0	0.0	0.0	0.0	0.0	0.0	0.0	0.0	0.0	0.0	0.0	0.0
OTU497185081	Bacteria; Bacteroidetes; Sphingobacteriia; Sphingobacteriales; env.OPS 17; uncultured bacterium; uncultured bacterium	0.0	0.0	0.0	0.0	0.0	0.0	0.0	0.0	0.0	0.0	0.0	0.0	0.0	0.0	0.0	0.0	0.0	0.0	0.0	0.0	0.0	0.0	1.0	2.0	8.0	34.0	73.0	88.0
OTU536868710	Bacteria; Proteobacteria; Alphaproteobacteria; Rhodospirillales; Rhodospirillaceae; uncultured; uncultured bacterium	0.0	0.0	0.0	0.0	0.0	0.0	3.0	74.0	26.0	7.0	7.0	0.0	0.0	0.0	0.0	0.0	0.0	0.0	0.0	0.0	0.0	0.0	0.0	0.0	0.0	0.0	0.0	0.0
OTU496087815	Bacteria; Acidobacteria; Holophagae; Holophagales; Holophagaceae; uncultured	0.0	0.0	0.0	0.0	26.0	19.0	38.0	279.0	66.0	26.0	69.0	1.0	0.0	0.0	0.0	0.0	0.0	0.0	0.0	0.0	0.0	0.0	0.0	0.0	0.0	0.0	0.0	0.0
OTU214395589	Bacteria; Planctomycetes; OM190	0.0	0.0	0.0	0.0	0.0	0.0	0.0	0.0	0.0	0.0	0.0	0.0	0.0	0.0	0.0	0.0	0.0	0.0	0.0	0.0	0.0	0.0	2.0	1.0	93.0	5.0	96.0	52.0
OTU296592556	Bacteria; Chloroflexi; JG30-KF-CM66; uncultured bacterium; uncultured bacterium; uncultured bacterium; uncultured bacterium	0.0	0.0	0.0	0.0	0.0	0.0	0.0	0.0	0.0	0.0	0.0	0.0	0.0	0.0	0.0	2.0	0.0	0.0	0.0	0.0	0.0	0.0	1.0	0.0	20.0	118.0	33.0	36.0
OTU540034353	Bacteria; Proteobacteria; Deltaproteobacteria; Sva0485; uncultured delta proteobacterium; uncultured delta proteobacterium; uncultured delta proteobacterium	0.0	0.0	0.0	0.0	0.0	0.0	0.0	0.0	0.0	0.0	0.0	0.0	0.0	0.0	0.0	0.0	0.0	10.0	23.0	19.0	95.0	65.0	19.0	8.0	0.0	0.0	0.0	0.0
OTU647912126	Bacteria; Actinobacteria; Actinobacteria; Micromonosporales; Micromonosporaceae; uncultured; uncultured bacterium	0.0	0.0	0.0	0.0	0.0	0.0	0.0	0.0	0.0	0.0	0.0	0.0	0.0	0.0	0.0	0.0	0.0	0.0	0.0	0.0	0.0	0.0	1.0	2.0	173.0	161.0	80.0	159.0
OTU814824469	Bacteria; Proteobacteria; Alphaproteobacteria; Parvularculales; Parvularculaceae; Amphiplicatus	0.0	1.0	0.0	6.0	0.0	0.0	0.0	0.0	0.0	0.0	0.0	0.0	0.0	0.0	0.0	0.0	0.0	0.0	0.0	0.0	0.0	0.0	1.0	1.0	70.0	7.0	48.0	138.0
OTU287976273	Bacteria; Proteobacteria; Gammaproteobacteria; Methylococcales; Methylococcaceae; Methylomonas; uncultured bacterium	0.0	0.0	0.0	0.0	3.0	3.0	99.0	772.0	3.0	13.0	113.0	0.0	0.0	2.0	0.0	1.0	0.0	1.0	0.0	0.0	0.0	0.0	0.0	0.0	0.0	0.0	0.0	0.0
OTU988280614	Bacteria; Proteobacteria; Betaproteobacteria; Nitrosomonadales; Nitrosomonadaceae; uncultured; uncultured bacterium	1.0	0.0	0.0	0.0	90.0	67.0	1.0	32.0	25.0	0.0	1.0	0.0	0.0	0.0	0.0	0.0	0.0	0.0	0.0	0.0	1.0	0.0	0.0	0.0	0.0	0.0	0.0	0.0
OTU382162442	Bacteria; Firmicutes; Clostridia; Clostridiales; Ruminococcaceae; Ruminococcaceae UCG-013; uncultured Clostridiaceae bacterium	0.0	0.0	0.0	0.0	15.0	44.0	13.0	67.0	83.0	1.0	1.0	0.0	0.0	0.0	0.0	0.0	0.0	0.0	0.0	0.0	0.0	0.0	0.0	0.0	0.0	0.0	0.0	0.0
OTU250345897	Bacteria; Gracilibacteria; uncultured bacterium; uncultured bacterium; uncultured bacterium; uncultured bacterium; uncultured bacterium	25.0	42.0	34.0	30.0	11.0	7.0	0.0	0.0	2.0	1.0	5.0	685.0	523.0	654.0	8.0	16.0	3.0	1.0	2.0	0.0	0.0	1.0	0.0	0.0	0.0	0.0	1.0	0.0
OTU453272857	Bacteria; Saccharibacteria; uncultured bacterium; uncultured bacterium; uncultured bacterium; uncultured bacterium; uncultured bacterium	0.0	0.0	0.0	0.0	0.0	0.0	0.0	0.0	0.0	0.0	0.0	0.0	0.0	0.0	0.0	0.0	0.0	0.0	0.0	0.0	0.0	0.0	0.0	0.0	5.0	8.0	13.0	85.0
OTU883477475	Bacteria; Proteobacteria; Gammaproteobacteria; Enterobacteriales; Enterobacteriaceae; Serratia	0.0	936.0	282.0	426.0	0.0	0.0	0.0	0.0	0.0	0.0	0.0	0.0	0.0	41.0	5.0	3.0	1.0	0.0	0.0	0.0	0.0	0.0	8.0	7.0	0.0	0.0	0.0	0.0
OTU736671359	Unassigned	0.0	0.0	0.0	0.0	0.0	0.0	0.0	0.0	0.0	0.0	0.0	0.0	0.0	0.0	0.0	0.0	0.0	0.0	0.0	0.0	0.0	0.0	0.0	0.0	0.0	114.0	0.0	0.0
OTU81665499	Bacteria; Chloroflexi; Dehalococcoidia; Sh765B-AG-111; uncultured bacterium; uncultured bacterium; uncultured bacterium	0.0	0.0	0.0	1.0	0.0	0.0	0.0	0.0	0.0	0.0	0.0	0.0	0.0	0.0	0.0	0.0	0.0	17.0	11.0	9.0	64.0	105.0	10.0	9.0	0.0	0.0	0.0	0.0
OTU800775511	Bacteria; Proteobacteria; Alphaproteobacteria; Rickettsiales; TK34	1.0	0.0	0.0	0.0	117.0	184.0	579.0	2444.0	2688.0	26.0	18.0	0.0	0.0	0.0	0.0	0.0	0.0	0.0	0.0	0.0	0.0	1.0	0.0	0.0	0.0	0.0	0.0	0.0
OTU358596102	Bacteria; Parcubacteria; uncultured bacterium; uncultured bacterium; uncultured bacterium; uncultured bacterium; uncultured bacterium	0.0	0.0	0.0	0.0	0.0	0.0	0.0	0.0	0.0	0.0	0.0	0.0	0.0	0.0	0.0	0.0	0.0	0.0	0.0	0.0	0.0	0.0	0.0	0.0	367.0	45.0	14.0	23.0
OTU702413062	Bacteria; Proteobacteria; SPOTSOCT00m83; uncultured bacterium; uncultured bacterium; uncultured bacterium; uncultured bacterium	1.0	11.0	0.0	59.0	0.0	0.0	0.0	0.0	0.0	0.0	0.0	0.0	0.0	5.0	0.0	47.0	0.0	0.0	0.0	0.0	0.0	5.0	0.0	0.0	0.0	0.0	2.0	0.0
OTU341018925	Bacteria; Proteobacteria; Deltaproteobacteria; Bdellovibrionales; Bacteriovoracaceae; Peredibacter; uncultured bacterium	0.0	0.0	0.0	0.0	19.0	15.0	8.0	53.0	20.0	1.0	1.0	0.0	0.0	0.0	0.0	0.0	0.0	0.0	0.0	0.0	0.0	0.0	0.0	0.0	0.0	0.0	0.0	0.0
OTU752775602	Bacteria; Proteobacteria; Deltaproteobacteria; NB1-j; Ambiguous_taxa; Ambiguous_taxa; Ambiguous_taxa	0.0	0.0	0.0	0.0	0.0	0.0	0.0	0.0	0.0	0.0	0.0	0.0	0.0	0.0	0.0	0.0	0.0	0.0	0.0	0.0	0.0	0.0	0.0	0.0	79.0	63.0	2.0	3.0
OTU48784594	Bacteria; Proteobacteria; Betaproteobacteria; Nitrosomonadales; Nitrosomonadaceae; uncultured	0.0	0.0	0.0	0.0	0.0	1.0	0.0	0.0	0.0	0.0	0.0	0.0	0.0	0.0	0.0	0.0	0.0	0.0	0.0	0.0	0.0	0.0	1.0	1.0	19.0	102.0	73.0	83.0
OTU807234989	Bacteria; Verrucomicrobia; Spartobacteria; Chthoniobacterales; Chthoniobacteraceae; Chthoniobacter; uncultured Verrucomicrobia bacterium	0.0	0.0	0.0	0.0	11.0	14.0	296.0	238.0	492.0	132.0	283.0	0.0	0.0	0.0	0.0	0.0	0.0	0.0	0.0	0.0	0.0	0.0	2.0	1.0	72.0	63.0	57.0	74.0
OTU664943277	Bacteria; Parcubacteria; Candidatus Falkowbacteria; uncultured bacterium; uncultured bacterium; uncultured bacterium; uncultured bacterium	0.0	0.0	0.0	0.0	11.0	9.0	48.0	243.0	333.0	10.0	13.0	0.0	0.0	0.0	0.0	0.0	0.0	0.0	0.0	0.0	0.0	0.0	0.0	0.0	0.0	0.0	0.0	0.0
OTU877986003	Bacteria; Chloroflexi; uncultured; uncultured Chloroflexi bacterium; uncultured Chloroflexi bacterium; uncultured Chloroflexi bacterium; uncultured Chloroflexi bacterium	0.0	0.0	0.0	0.0	0.0	0.0	0.0	0.0	0.0	0.0	0.0	0.0	0.0	0.0	0.0	0.0	0.0	12.0	1.0	10.0	27.0	54.0	16.0	16.0	0.0	0.0	0.0	0.0
OTU889745496	Bacteria; Planctomycetes; Phycisphaerae; mle1-8; uncultured organism; uncultured organism; uncultured organism	0.0	0.0	0.0	0.0	0.0	0.0	0.0	0.0	0.0	0.0	0.0	0.0	0.0	0.0	0.0	0.0	0.0	11.0	13.0	42.0	171.0	267.0	43.0	46.0	0.0	0.0	0.0	0.0
OTU982541943	Bacteria; Actinobacteria; Actinobacteria; PeM15	2.0	104.0	44.0	53.0	0.0	0.0	0.0	0.0	0.0	0.0	0.0	0.0	0.0	0.0	3.0	46.0	17.0	0.0	0.0	0.0	0.0	0.0	0.0	0.0	0.0	0.0	0.0	0.0
OTU912879096	Bacteria; Proteobacteria; Deltaproteobacteria; NB1-j	0.0	0.0	0.0	1.0	0.0	0.0	0.0	0.0	0.0	0.0	0.0	0.0	0.0	0.0	0.0	1.0	0.0	0.0	0.0	0.0	0.0	0.0	4.0	1.0	611.0	272.0	122.0	433.0
OTU441659822	Bacteria; Chloroflexi; Anaerolineae; Anaerolineales; Anaerolineaceae; uncultured	0.0	0.0	0.0	0.0	0.0	0.0	0.0	0.0	0.0	1.0	0.0	0.0	0.0	0.0	0.0	0.0	0.0	7.0	3.0	18.0	54.0	141.0	119.0	89.0	0.0	0.0	0.0	0.0
OTU686795488	Unassigned	0.0	0.0	0.0	0.0	0.0	0.0	0.0	0.0	0.0	0.0	0.0	0.0	0.0	0.0	0.0	0.0	0.0	0.0	0.0	0.0	0.0	0.0	0.0	0.0	26.0	580.0	2.0	0.0
OTU875390694	Bacteria; Proteobacteria; Deltaproteobacteria; NB1-j; uncultured bacterium; uncultured bacterium; uncultured bacterium	0.0	0.0	0.0	0.0	0.0	0.0	0.0	0.0	0.0	0.0	0.0	0.0	0.0	0.0	0.0	0.0	0.0	0.0	0.0	0.0	0.0	0.0	2.0	3.0	90.0	64.0	29.0	36.0
OTU13966531	Bacteria; Chloroflexi; Ardenticatenia; uncultured; uncultured bacterium; uncultured bacterium; uncultured bacterium	0.0	0.0	0.0	0.0	0.0	0.0	0.0	0.0	0.0	0.0	0.0	0.0	0.0	0.0	0.0	0.0	0.0	0.0	0.0	0.0	0.0	0.0	2.0	2.0	132.0	1.0	108.0	166.0
OTU809588101	Bacteria; Chloroflexi; Anaerolineae; Anaerolineales; Anaerolineaceae; uncultured	0.0	0.0	0.0	0.0	0.0	0.0	0.0	0.0	0.0	0.0	0.0	0.0	0.0	0.0	0.0	0.0	0.0	0.0	0.0	0.0	0.0	0.0	0.0	1.0	94.0	232.0	22.0	47.0
OTU176450706	Bacteria; Chloroflexi; Anaerolineae; Anaerolineales; Anaerolineaceae; uncultured; uncultured bacterium	0.0	0.0	0.0	0.0	0.0	0.0	0.0	0.0	0.0	0.0	0.0	0.0	0.0	0.0	0.0	1.0	0.0	0.0	0.0	0.0	0.0	0.0	16.0	16.0	830.0	113.0	922.0	1217.0
OTU101514151	Bacteria; Chloroflexi; Anaerolineae; Anaerolineales; Anaerolineaceae; uncultured; uncultured bacterium	0.0	0.0	0.0	0.0	0.0	0.0	1.0	6.0	11.0	217.0	245.0	0.0	0.0	0.0	0.0	0.0	0.0	1.0	1.0	0.0	1.0	0.0	0.0	0.0	0.0	0.0	0.0	0.0
OTU76791722	Bacteria; Deferribacteres; Deferribacteres Incertae Sedis; Unknown Order; Unknown Family; Caldithrix; Ambiguous_taxa	0.0	0.0	0.0	0.0	2.0	1.0	3.0	2.0	3.0	180.0	205.0	0.0	0.0	0.0	0.0	0.0	0.0	10.0	9.0	4.0	0.0	0.0	0.0	0.0	0.0	0.0	0.0	0.0
OTU524527561	Bacteria; Nitrospirae; Nitrospira; Nitrospirales; Nitrospiraceae; uncultured; uncultured Thermodesulfovibrio sp.	0.0	0.0	0.0	0.0	0.0	0.0	0.0	0.0	0.0	0.0	0.0	0.0	0.0	0.0	0.0	0.0	0.0	0.0	0.0	1.0	3.0	5.0	167.0	96.0	0.0	0.0	0.0	0.0
OTU633224841	Bacteria; Spirochaetae; Spirochaetes; Spirochaetales; Brevinemataceae; Brevinema; uncultured bacterium	0.0	0.0	0.0	0.0	3.0	0.0	61.0	135.0	297.0	6.0	5.0	0.0	0.0	0.0	0.0	0.0	0.0	0.0	0.0	0.0	0.0	0.0	0.0	0.0	0.0	0.0	0.0	0.0
OTU297633134	Bacteria; Bacteroidetes; Bacteroidia; Bacteroidales; Marinilabiaceae; uncultured; Ambiguous_taxa	1.0	0.0	0.0	0.0	0.0	0.0	2.0	19.0	11.0	253.0	563.0	0.0	0.0	0.0	0.0	0.0	0.0	0.0	0.0	0.0	0.0	0.0	0.0	0.0	0.0	0.0	0.0	0.0
OTU787668665	Bacteria; SR1 (Absconditabacteria); uncultured bacterium; uncultured bacterium; uncultured bacterium; uncultured bacterium; uncultured bacterium	0.0	0.0	0.0	0.0	0.0	0.0	29.0	49.0	156.0	0.0	1.0	0.0	0.0	0.0	0.0	0.0	0.0	0.0	0.0	0.0	0.0	0.0	0.0	0.0	0.0	0.0	0.0	0.0
OTU383258907	Bacteria; Proteobacteria; Alphaproteobacteria; Alphaproteobacteria Incertae Sedis; Unknown Family; uncultured	0.0	1.0	1.0	0.0	58.0	64.0	52.0	75.0	111.0	22.0	41.0	2.0	0.0	0.0	0.0	0.0	0.0	0.0	0.0	0.0	0.0	0.0	0.0	0.0	0.0	0.0	0.0	0.0
OTU402512735	Bacteria; Chloroflexi; Anaerolineae; Anaerolineales; Anaerolineaceae; uncultured; uncultured bacterium	0.0	0.0	0.0	0.0	0.0	0.0	0.0	0.0	0.0	0.0	0.0	0.0	0.0	0.0	0.0	0.0	0.0	13.0	18.0	15.0	29.0	34.0	25.0	14.0	0.0	0.0	0.0	0.0
OTU952685322	Bacteria; SR1 (Absconditabacteria)	0.0	2.0	2.0	0.0	1.0	7.0	91.0	259.0	437.0	1.0	0.0	0.0	0.0	0.0	0.0	0.0	0.0	0.0	0.0	0.0	0.0	0.0	0.0	0.0	0.0	0.0	0.0	0.0
OTU435991322	Bacteria; Acidobacteria; Subgroup 6; uncultured bacterium; uncultured bacterium; uncultured bacterium; uncultured bacterium	0.0	0.0	0.0	0.0	0.0	0.0	0.0	0.0	0.0	0.0	0.0	0.0	0.0	0.0	0.0	0.0	0.0	0.0	1.0	0.0	0.0	0.0	0.0	1.0	158.0	47.0	17.0	87.0
OTU290136991	Bacteria; Planctomycetes; Planctomycetacia; Planctomycetales; Planctomycetaceae; Planctomyces; uncultured bacterium	0.0	0.0	0.0	0.0	0.0	0.0	0.0	0.0	0.0	0.0	0.0	0.0	0.0	0.0	0.0	0.0	0.0	0.0	0.0	0.0	0.0	0.0	1.0	1.0	5.0	14.0	24.0	189.0
OTU505677848	Bacteria; Proteobacteria; Epsilonproteobacteria; Campylobacterales; Campylobacteraceae; Sulfurospirillum; Ambiguous_taxa	11.0	8.0	13.0	8.0	15.0	17.0	0.0	55.0	14.0	17.0	16.0	65.0	224.0	2.0	0.0	6.0	0.0	6.0	6.0	0.0	0.0	0.0	1.0	0.0	0.0	0.0	0.0	0.0
OTU998787503	Bacteria; Bacteroidetes; Bacteroidia; Bacteroidales; FTLpost3	0.0	0.0	1.0	0.0	0.0	2.0	0.0	106.0	4.0	1.0	2.0	0.0	1.0	0.0	0.0	0.0	0.0	0.0	0.0	0.0	0.0	0.0	0.0	0.0	0.0	0.0	0.0	0.0
OTU339505788	Archaea; Bathyarchaeota; uncultured archaeon; uncultured archaeon; uncultured archaeon; uncultured archaeon; uncultured archaeon	0.0	0.0	0.0	0.0	0.0	0.0	0.0	0.0	0.0	0.0	0.0	0.0	0.0	0.0	0.0	0.0	0.0	2.0	7.0	39.0	155.0	213.0	15.0	10.0	0.0	0.0	0.0	0.0
OTU990123055	Bacteria; Proteobacteria; Alphaproteobacteria; Rhizobiales; Rhizobiales Incertae Sedis; Nordella; uncultured bacterium	0.0	0.0	0.0	0.0	0.0	0.0	0.0	0.0	0.0	1.0	1.0	0.0	0.0	0.0	0.0	1.0	0.0	0.0	0.0	0.0	0.0	0.0	0.0	0.0	48.0	65.0	22.0	24.0
OTU614795959	Bacteria; Proteobacteria; Deltaproteobacteria; Oligoflexales; Oligoflexaceae; uncultured bacterium; uncultured bacterium	0.0	0.0	0.0	0.0	0.0	0.0	23.0	113.0	85.0	0.0	0.0	0.0	0.0	0.0	0.0	0.0	0.0	0.0	0.0	0.0	0.0	0.0	0.0	0.0	0.0	0.0	0.0	0.0
OTU259845365	Bacteria; Proteobacteria; Alphaproteobacteria; Rhizobiales; Hyphomicrobiaceae; Pedomicrobium; uncultured bacterium	0.0	0.0	0.0	0.0	1.0	0.0	3.0	17.0	13.0	17.0	25.0	0.0	0.0	0.0	0.0	2.0	0.0	0.0	0.0	0.0	0.0	0.0	0.0	1.0	60.0	58.0	64.0	48.0
OTU532638190	Bacteria; Proteobacteria; Deltaproteobacteria; Bdellovibrionales; Bdellovibrionaceae; Bdellovibrio; Ambiguous_taxa	0.0	0.0	0.0	1.0	6.0	7.0	6.0	2.0	251.0	4.0	5.0	0.0	0.0	0.0	0.0	0.0	0.0	0.0	0.0	0.0	0.0	0.0	0.0	0.0	0.0	0.0	0.0	0.0
OTU789242158	Bacteria; Planctomycetes; Phycisphaerae; mle1-8	0.0	0.0	0.0	0.0	0.0	0.0	0.0	0.0	0.0	0.0	0.0	0.0	0.0	0.0	0.0	0.0	0.0	8.0	6.0	10.0	29.0	46.0	8.0	7.0	0.0	0.0	0.0	0.0
OTU714683256	Bacteria; SR1 (Absconditabacteria); uncultured candidate division SR1 bacterium; uncultured candidate division SR1 bacterium; uncultured candidate division SR1 bacterium; uncultured candidate division SR1 bacterium; uncultured candidate division SR1 bacterium	0.0	0.0	0.0	0.0	0.0	0.0	54.0	5.0	59.0	0.0	0.0	0.0	0.0	0.0	0.0	0.0	0.0	0.0	0.0	0.0	0.0	0.0	0.0	0.0	0.0	0.0	0.0	0.0
OTU424134546	Bacteria; Proteobacteria; Betaproteobacteria; Burkholderiales; Oxalobacteraceae; Undibacterium; uncultured bacterium	0.0	0.0	0.0	0.0	0.0	0.0	0.0	0.0	0.0	0.0	0.0	0.0	0.0	1.0	0.0	0.0	0.0	0.0	0.0	0.0	458.0	0.0	21.0	37.0	0.0	0.0	0.0	0.0
OTU579424328	Bacteria; Nitrospirae; Nitrospira; Nitrospirales; Nitrospiraceae; Nitrospira; uncultured bacterium	0.0	0.0	0.0	0.0	0.0	0.0	0.0	0.0	0.0	7.0	1.0	0.0	0.0	0.0	0.0	0.0	0.0	0.0	0.0	0.0	0.0	0.0	3.0	0.0	605.0	281.0	65.0	313.0
OTU846761399	Bacteria; Chloroflexi; Thermoflexia; Thermoflexales; Thermoflexaceae; Thermoflexus; uncultured bacterium	3.0	0.0	0.0	0.0	0.0	0.0	0.0	0.0	0.0	0.0	0.0	0.0	0.0	0.0	0.0	0.0	0.0	68.0	62.0	42.0	108.0	169.0	48.0	54.0	0.0	0.0	0.0	0.0
OTU48493865	Bacteria; Bacteroidetes; Bacteroidia; Bacteroidales; Marinilabiaceae; uncultured; uncultured bacterium	4.0	2.0	0.0	1.0	10.0	4.0	6.0	34.0	67.0	1.0	8.0	0.0	17.0	1.0	0.0	0.0	0.0	2.0	2.0	0.0	0.0	0.0	0.0	0.0	0.0	0.0	0.0	0.0
OTU883533372	Bacteria; Chlorobi; Chlorobia; Chlorobiales; OPB56	0.0	0.0	0.0	0.0	2.0	0.0	17.0	23.0	111.0	1.0	0.0	0.0	0.0	0.0	0.0	0.0	0.0	0.0	0.0	0.0	0.0	0.0	0.0	0.0	0.0	0.0	0.0	0.0
OTU302922902	Unassigned	0.0	0.0	0.0	0.0	0.0	0.0	0.0	0.0	0.0	0.0	0.0	0.0	0.0	0.0	0.0	0.0	0.0	0.0	0.0	0.0	0.0	0.0	0.0	0.0	0.0	147.0	0.0	7.0
OTU184185213	Bacteria; Caldiserica; Caldisericia; Caldisericales; LF045; uncultured bacterium; uncultured bacterium	0.0	1.0	0.0	0.0	2.0	8.0	2.0	12.0	6.0	441.0	426.0	0.0	0.0	0.0	0.0	0.0	0.0	0.0	0.0	0.0	0.0	0.0	0.0	0.0	0.0	0.0	0.0	0.0
OTU78250725	Bacteria; Proteobacteria; Deltaproteobacteria; Myxococcales; P3OB-42; uncultured bacterium; uncultured bacterium	0.0	0.0	0.0	0.0	0.0	0.0	0.0	0.0	0.0	0.0	0.0	0.0	0.0	0.0	0.0	0.0	0.0	0.0	0.0	0.0	0.0	0.0	0.0	0.0	157.0	5.0	33.0	26.0
OTU722324590	Bacteria; Proteobacteria; Alphaproteobacteria; Rhodobacterales; Rhodobacteraceae; Rhodobacter	0.0	5.0	0.0	2.0	59.0	57.0	32.0	144.0	298.0	61.0	57.0	0.0	1.0	2.0	0.0	0.0	1.0	0.0	0.0	0.0	14.0	1.0	0.0	0.0	0.0	0.0	0.0	1.0
OTU917580278	Bacteria; Fibrobacteres; Fibrobacteria; Fibrobacterales; Fibrobacteraceae; uncultured; uncultured bacterium	0.0	0.0	0.0	0.0	4.0	1.0	0.0	1.0	0.0	86.0	115.0	0.0	0.0	0.0	0.0	0.0	0.0	0.0	0.0	0.0	0.0	0.0	0.0	0.0	0.0	0.0	0.0	0.0
OTU586823617	Bacteria; Bacteroidetes; Bacteroidia; Bacteroidales; Rikenellaceae; vadinBC27 wastewater-sludge group; uncultured bacterium	1.0	0.0	1.0	0.0	6.0	5.0	168.0	591.0	1048.0	48.0	34.0	0.0	0.0	0.0	0.0	0.0	0.0	0.0	0.0	0.0	0.0	0.0	0.0	0.0	0.0	0.0	0.0	0.0
OTU726853649	Bacteria; Proteobacteria; Deltaproteobacteria; Myxococcales; Sandaracinaceae; uncultured; uncultured bacterium	0.0	0.0	0.0	0.0	51.0	88.0	13.0	38.0	48.0	72.0	38.0	0.0	0.0	1.0	0.0	0.0	0.0	0.0	0.0	0.0	0.0	0.0	0.0	0.0	0.0	0.0	0.0	0.0
OTU842747606	Bacteria; Planctomycetes; Planctomycetacia; Planctomycetales; Planctomycetaceae; uncultured; uncultured bacterium	0.0	0.0	0.0	0.0	0.0	0.0	0.0	0.0	0.0	0.0	0.0	0.0	0.0	0.0	0.0	0.0	0.0	0.0	0.0	0.0	0.0	0.0	0.0	1.0	38.0	49.0	60.0	62.0
OTU300742858	Bacteria; Lentisphaerae; Lentisphaeria; Victivallales; Victivallaceae; uncultured bacterium; uncultured bacterium	0.0	0.0	0.0	0.0	3.0	1.0	0.0	146.0	0.0	14.0	12.0	0.0	0.0	0.0	0.0	0.0	0.0	0.0	0.0	0.0	0.0	0.0	0.0	0.0	0.0	0.0	0.0	0.0
OTU703075701	Bacteria; Proteobacteria; Deltaproteobacteria; Desulfuromonadales; Geobacteraceae; Geobacter	0.0	0.0	0.0	0.0	2.0	6.0	3.0	46.0	14.0	30.0	27.0	0.0	0.0	0.0	0.0	0.0	0.0	0.0	0.0	0.0	0.0	0.0	0.0	0.0	0.0	0.0	0.0	0.0
OTU566714983	Bacteria; Cyanobacteria; Melainabacteria; Obscuribacterales; uncultured bacterium; uncultured bacterium; uncultured bacterium	0.0	0.0	0.0	0.0	0.0	0.0	0.0	0.0	0.0	0.0	0.0	0.0	0.0	0.0	0.0	0.0	0.0	0.0	0.0	0.0	0.0	0.0	3.0	5.0	137.0	101.0	263.0	344.0
OTU864810049	Bacteria; AC1; Ambiguous_taxa; Ambiguous_taxa; Ambiguous_taxa; Ambiguous_taxa; Ambiguous_taxa	0.0	0.0	0.0	0.0	0.0	0.0	0.0	0.0	0.0	0.0	0.0	0.0	0.0	0.0	0.0	0.0	0.0	8.0	3.0	28.0	105.0	217.0	56.0	50.0	0.0	0.0	0.0	0.0
OTU558475775	Bacteria; WS2; uncultured bacterium; uncultured bacterium; uncultured bacterium; uncultured bacterium; uncultured bacterium	0.0	0.0	0.0	0.0	0.0	0.0	0.0	0.0	0.0	0.0	0.0	0.0	0.0	0.0	0.0	0.0	0.0	27.0	12.0	7.0	57.0	59.0	16.0	12.0	0.0	0.0	0.0	0.0
OTU397134322	Bacteria; RBG-1 (Zixibacteria); uncultured bacterium; uncultured bacterium; uncultured bacterium; uncultured bacterium; uncultured bacterium	1.0	0.0	1.0	0.0	0.0	0.0	0.0	0.0	0.0	0.0	0.0	0.0	0.0	0.0	0.0	0.0	0.0	26.0	21.0	9.0	42.0	76.0	15.0	7.0	0.0	0.0	0.0	0.0
OTU70186598	Bacteria; Gracilibacteria; uncultured organism; uncultured organism; uncultured organism; uncultured organism; uncultured organism	0.0	0.0	0.0	0.0	2.0	1.0	1.0	26.0	10.0	144.0	95.0	0.0	0.0	0.0	0.0	0.0	0.0	0.0	0.0	0.0	0.0	0.0	0.0	0.0	0.0	0.0	0.0	0.0
OTU293140183	Bacteria; Fibrobacteres; Chitinivibrionia; possible order 07; uncultured bacterium; uncultured bacterium; uncultured bacterium	0.0	0.0	0.0	0.0	2.0	3.0	8.0	533.0	154.0	2.0	18.0	0.0	0.0	0.0	0.0	0.0	0.0	0.0	1.0	0.0	0.0	2.0	0.0	0.0	0.0	0.0	0.0	0.0
OTU952180489	Bacteria; Chlorobi; Chlorobia; Chlorobiales; OPB56; uncultured organism; uncultured organism	0.0	0.0	0.0	0.0	0.0	1.0	0.0	411.0	0.0	0.0	0.0	0.0	0.0	0.0	0.0	0.0	0.0	0.0	0.0	0.0	0.0	0.0	0.0	0.0	0.0	0.0	0.0	0.0
OTU881408143	Unassigned	0.0	0.0	0.0	0.0	0.0	0.0	0.0	0.0	0.0	70.0	69.0	0.0	0.0	0.0	0.0	0.0	0.0	0.0	0.0	0.0	0.0	0.0	0.0	0.0	0.0	0.0	0.0	0.0
OTU18322793	Bacteria; Verrucomicrobia; Verrucomicrobiae; Verrucomicrobiales; Verrucomicrobiaceae; uncultured; uncultured bacterium	0.0	0.0	0.0	0.0	2.0	1.0	17.0	1.0	184.0	3.0	0.0	0.0	0.0	0.0	0.0	0.0	0.0	0.0	0.0	0.0	0.0	0.0	0.0	0.0	0.0	0.0	0.0	0.0
OTU267249463	Bacteria; Proteobacteria; Deltaproteobacteria; Myxococcales; Haliangiaceae; Haliangium; uncultured bacterium	0.0	0.0	0.0	0.0	0.0	0.0	0.0	0.0	0.0	0.0	0.0	0.0	0.0	0.0	0.0	0.0	0.0	0.0	0.0	0.0	0.0	0.0	0.0	0.0	258.0	3.0	0.0	8.0
OTU64805823	Bacteria; Nitrospirae; Nitrospira; Nitrospirales; 0319-6A21; uncultured bacterium; uncultured bacterium	0.0	0.0	0.0	0.0	0.0	0.0	0.0	0.0	0.0	0.0	0.0	0.0	0.0	0.0	0.0	0.0	0.0	0.0	0.0	0.0	0.0	0.0	0.0	1.0	77.0	112.0	13.0	129.0
OTU595364429	Bacteria; Planctomycetes; Phycisphaerae; CCM11a; uncultured bacterium; uncultured bacterium; uncultured bacterium	0.0	0.0	0.0	0.0	0.0	0.0	0.0	0.0	0.0	0.0	0.0	0.0	0.0	0.0	0.0	0.0	0.0	0.0	0.0	0.0	0.0	0.0	5.0	4.0	16.0	0.0	95.0	3.0
OTU684821074	Bacteria; Chloroflexi; Caldilineae; Caldilineales; Caldilineaceae; Litorilinea	0.0	0.0	0.0	0.0	0.0	0.0	0.0	0.0	0.0	0.0	0.0	0.0	0.0	0.0	0.0	0.0	0.0	0.0	0.0	0.0	0.0	0.0	1.0	5.0	105.0	98.0	92.0	133.0
OTU911182657	Bacteria; Acidobacteria; Blastocatellia; Blastocatellales; Blastocatellaceae (Subgroup 4); 11-24; uncultured bacterium	0.0	0.0	0.0	0.0	0.0	0.0	0.0	0.0	0.0	0.0	0.0	0.0	0.0	0.0	0.0	4.0	1.0	0.0	0.0	0.0	0.0	1.0	29.0	24.0	279.0	206.0	1585.0	623.0
OTU347992646	Bacteria; AC1; uncultured bacterium; uncultured bacterium; uncultured bacterium; uncultured bacterium; uncultured bacterium	0.0	0.0	0.0	0.0	0.0	0.0	0.0	0.0	0.0	0.0	0.0	0.0	0.0	0.0	0.0	0.0	0.0	15.0	6.0	16.0	41.0	131.0	17.0	21.0	0.0	0.0	0.0	0.0
OTU984148965	Bacteria; Latescibacteria; uncultured bacterium; uncultured bacterium; uncultured bacterium; uncultured bacterium; uncultured bacterium	0.0	0.0	0.0	0.0	0.0	0.0	0.0	0.0	0.0	0.0	0.0	0.0	0.0	0.0	0.0	0.0	0.0	0.0	0.0	0.0	0.0	0.0	0.0	0.0	160.0	0.0	0.0	0.0
OTU144886231	Bacteria; Proteobacteria; Alphaproteobacteria; Rhizobiales; Rhodobiaceae	0.0	4.0	1.0	7.0	0.0	0.0	0.0	0.0	0.0	0.0	0.0	0.0	0.0	2.0	1.0	5.0	0.0	0.0	1.0	0.0	0.0	0.0	0.0	0.0	24.0	28.0	20.0	17.0
OTU788812840	Bacteria; Acidobacteria; Solibacteres; Solibacterales; Solibacteraceae (Subgroup 3); Candidatus Solibacter; Ambiguous_taxa	0.0	0.0	0.0	0.0	0.0	0.0	0.0	0.0	0.0	0.0	0.0	0.0	0.0	0.0	0.0	1.0	0.0	0.0	0.0	0.0	0.0	0.0	10.0	12.0	589.0	90.0	882.0	944.0
OTU351678610	Bacteria; Chloroflexi; Anaerolineae; Anaerolineales; Anaerolineaceae; uncultured; uncultured bacterium	0.0	0.0	0.0	0.0	0.0	0.0	0.0	0.0	0.0	0.0	0.0	0.0	0.0	0.0	0.0	0.0	0.0	0.0	0.0	0.0	0.0	0.0	7.0	9.0	219.0	81.0	555.0	604.0
OTU421711883	Bacteria; Gemmatimonadetes; MD2902-B12; uncultured bacterium; uncultured bacterium; uncultured bacterium; uncultured bacterium	0.0	0.0	0.0	0.0	0.0	0.0	0.0	0.0	0.0	0.0	0.0	0.0	0.0	0.0	0.0	0.0	0.0	5.0	11.0	20.0	61.0	107.0	25.0	17.0	0.0	0.0	0.0	0.0
OTU706148562	Bacteria; Bacteroidetes; Bacteroidia; Bacteroidales; Marinilabiaceae; uncultured; uncultured bacterium	0.0	0.0	0.0	0.0	0.0	3.0	111.0	243.0	163.0	6.0	22.0	0.0	0.0	0.0	0.0	0.0	0.0	0.0	0.0	0.0	0.0	0.0	0.0	0.0	0.0	0.0	0.0	0.0
OTU38429306	Bacteria; Cloacimonetes; SHA-4; uncultured bacterium; uncultured bacterium; uncultured bacterium; uncultured bacterium	0.0	0.0	0.0	1.0	1.0	2.0	16.0	278.0	238.0	15.0	38.0	0.0	0.0	0.0	0.0	1.0	0.0	0.0	0.0	0.0	0.0	0.0	0.0	0.0	0.0	0.0	0.0	0.0
OTU357919556	Bacteria; Ignavibacteriae; Ignavibacteria; Ignavibacteriales; IheB3-7; uncultured bacterium; uncultured bacterium	0.0	1.0	0.0	0.0	3.0	1.0	6.0	67.0	19.0	90.0	134.0	0.0	0.0	2.0	0.0	0.0	0.0	0.0	0.0	0.0	0.0	0.0	0.0	0.0	0.0	0.0	0.0	0.0
OTU172082852	Bacteria; Latescibacteria; uncultured bacterium; uncultured bacterium; uncultured bacterium; uncultured bacterium; uncultured bacterium	0.0	0.0	0.0	0.0	3.0	4.0	3.0	18.0	25.0	73.0	31.0	0.0	0.0	0.0	0.0	0.0	0.0	0.0	1.0	0.0	0.0	0.0	2.0	0.0	0.0	0.0	0.0	0.0
OTU270431547	Bacteria; Deferribacteres; Deferribacteres Incertae Sedis; Unknown Order; Unknown Family; Caldithrix; uncultured Caldithrix sp.	0.0	1.0	0.0	0.0	0.0	0.0	0.0	0.0	0.0	0.0	0.0	0.0	0.0	0.0	0.0	0.0	0.0	31.0	24.0	15.0	59.0	84.0	12.0	9.0	0.0	0.0	0.0	0.0
OTU816299778	Bacteria; Bacteroidetes; Sphingobacteriia; Sphingobacteriales; Lentimicrobiaceae	1.0	0.0	0.0	0.0	32.0	60.0	94.0	791.0	821.0	17.0	22.0	0.0	5.0	2.0	0.0	0.0	0.0	0.0	0.0	0.0	0.0	0.0	0.0	0.0	0.0	0.0	0.0	0.0
OTU384006293	Archaea; Euryarchaeota; Thermoplasmata; Thermoplasmatales; ASC21; uncultured archaeon; uncultured archaeon	0.0	2.0	0.0	1.0	0.0	0.0	0.0	0.0	0.0	0.0	0.0	0.0	0.0	0.0	0.0	0.0	0.0	13.0	11.0	12.0	82.0	40.0	22.0	24.0	0.0	0.0	0.0	0.0
OTU206749179	Bacteria; Proteobacteria; Deltaproteobacteria; Myxococcales; Nannocystaceae; uncultured	1.0	0.0	0.0	0.0	34.0	42.0	1285.0	3976.0	4277.0	13.0	19.0	0.0	0.0	0.0	0.0	0.0	0.0	0.0	0.0	0.0	0.0	2.0	0.0	0.0	7.0	20.0	8.0	1.0
OTU958588876	Bacteria; Proteobacteria; Alphaproteobacteria; Alphaproteobacteria Incertae Sedis; Unknown Family; uncultured; uncultured bacterium	0.0	0.0	0.0	0.0	13.0	31.0	148.0	577.0	636.0	10.0	16.0	0.0	0.0	0.0	0.0	0.0	0.0	0.0	0.0	0.0	0.0	0.0	0.0	0.0	0.0	0.0	0.0	0.0
OTU482121204	Bacteria; RBG-1 (Zixibacteria); uncultured organism; uncultured organism; uncultured organism; uncultured organism; uncultured organism	0.0	0.0	0.0	0.0	0.0	0.0	0.0	0.0	1.0	212.0	297.0	0.0	0.0	0.0	0.0	0.0	0.0	0.0	0.0	0.0	0.0	0.0	0.0	0.0	0.0	0.0	0.0	0.0
OTU351683435	Unassigned	1.0	0.0	0.0	0.0	169.0	199.0	23.0	361.0	1085.0	83.0	64.0	0.0	0.0	0.0	0.0	0.0	0.0	0.0	0.0	0.0	0.0	0.0	0.0	0.0	0.0	0.0	0.0	0.0
OTU991402329	Bacteria; Chlorobi; Chlorobia; Chlorobiales; OPB56; uncultured bacterium; uncultured bacterium	0.0	0.0	0.0	0.0	0.0	0.0	0.0	0.0	0.0	62.0	125.0	0.0	0.0	0.0	0.0	0.0	0.0	0.0	0.0	0.0	0.0	0.0	0.0	0.0	0.0	0.0	0.0	0.0
OTU133004858	Bacteria; Planctomycetes; Phycisphaerae; CCM11a; uncultured bacterium; uncultured bacterium; uncultured bacterium	0.0	0.0	0.0	0.0	0.0	0.0	0.0	0.0	0.0	0.0	0.0	0.0	0.0	0.0	0.0	0.0	0.0	0.0	0.0	0.0	0.0	0.0	0.0	0.0	249.0	39.0	29.0	66.0
OTU625100193	Bacteria; Bacteroidetes; Sphingobacteriia; Sphingobacteriales; NS11-12 marine group; uncultured bacterium; uncultured bacterium	1.0	0.0	0.0	0.0	206.0	272.0	9.0	44.0	55.0	1.0	1.0	0.0	0.0	1.0	0.0	0.0	0.0	0.0	0.0	0.0	1.0	0.0	0.0	0.0	0.0	0.0	0.0	0.0
OTU402428561	Bacteria; RBG-1 (Zixibacteria); uncultured bacterium; uncultured bacterium; uncultured bacterium; uncultured bacterium; uncultured bacterium	0.0	0.0	0.0	0.0	0.0	0.0	0.0	0.0	0.0	17.0	108.0	0.0	0.0	0.0	0.0	0.0	0.0	0.0	0.0	0.0	0.0	0.0	0.0	0.0	0.0	0.0	0.0	0.0
OTU225569191	Bacteria; Proteobacteria; Deltaproteobacteria; Desulfobacterales; Desulfobacteraceae; uncultured; uncultured delta proteobacterium	0.0	0.0	0.0	0.0	1.0	2.0	11.0	117.0	17.0	2.0	7.0	0.0	0.0	0.0	0.0	0.0	0.0	0.0	0.0	0.0	0.0	0.0	0.0	0.0	0.0	0.0	0.0	0.0
OTU20177797	Bacteria; Chloroflexi; Anaerolineae; Anaerolineales; Anaerolineaceae; uncultured; uncultured organism	0.0	0.0	0.0	0.0	0.0	0.0	0.0	0.0	0.0	0.0	0.0	0.0	0.0	0.0	0.0	0.0	0.0	6.0	13.0	7.0	47.0	68.0	7.0	6.0	0.0	0.0	0.0	0.0
OTU601132256	Bacteria; Acidobacteria; Solibacteres; Solibacterales; Solibacteraceae (Subgroup 3); PAUC26f; Ambiguous_taxa	0.0	0.0	0.0	0.0	0.0	0.0	0.0	0.0	0.0	0.0	0.0	0.0	0.0	0.0	0.0	0.0	0.0	0.0	0.0	0.0	0.0	0.0	4.0	3.0	153.0	10.0	141.0	76.0
OTU929722647	Bacteria; Chloroflexi; S085; uncultured bacterium; uncultured bacterium; uncultured bacterium; uncultured bacterium	0.0	0.0	0.0	0.0	0.0	0.0	0.0	0.0	0.0	0.0	0.0	0.0	0.0	0.0	0.0	0.0	0.0	0.0	0.0	0.0	0.0	0.0	0.0	0.0	22.0	78.0	7.0	11.0
OTU109913948	Bacteria; Parcubacteria; Candidatus Azambacteria; uncultured bacterium; uncultured bacterium; uncultured bacterium; uncultured bacterium	0.0	1.0	0.0	0.0	0.0	0.0	0.0	0.0	0.0	92.0	142.0	0.0	0.0	0.0	0.0	0.0	0.0	0.0	0.0	0.0	0.0	0.0	0.0	0.0	0.0	0.0	0.0	0.0
OTU273105803	Bacteria; Bacteroidetes; Sphingobacteriia; Sphingobacteriales; Saprospiraceae; Lewinella	0.0	0.0	0.0	0.0	115.0	77.0	15.0	18.0	24.0	0.0	0.0	0.0	0.0	0.0	0.0	0.0	0.0	0.0	0.0	0.0	0.0	0.0	0.0	0.0	0.0	0.0	0.0	0.0
OTU8832461	Bacteria; Proteobacteria; Alphaproteobacteria; Sphingomonadales; Sphingomonadaceae	0.0	0.0	0.0	0.0	2.0	0.0	3.0	9.0	5.0	39.0	59.0	0.0	0.0	0.0	0.0	0.0	0.0	0.0	0.0	0.0	0.0	0.0	0.0	0.0	0.0	0.0	0.0	0.0
OTU988009168	Bacteria; Proteobacteria; Alphaproteobacteria; Caulobacterales; Hyphomonadaceae; Oceanicaulis; uncultured organism	0.0	0.0	0.0	0.0	0.0	0.0	0.0	0.0	0.0	0.0	0.0	0.0	0.0	0.0	0.0	0.0	0.0	0.0	0.0	0.0	0.0	0.0	1.0	0.0	18.0	87.0	23.0	3.0
OTU798394877	Bacteria; Acidobacteria; Subgroup 2; uncultured bacterium; uncultured bacterium; uncultured bacterium; uncultured bacterium	0.0	0.0	0.0	0.0	0.0	0.0	0.0	0.0	0.0	0.0	0.0	0.0	0.0	0.0	0.0	0.0	0.0	0.0	0.0	0.0	0.0	0.0	0.0	0.0	61.0	0.0	0.0	106.0
OTU206015449	Bacteria; Chloroflexi; SBR2076; uncultured bacterium; uncultured bacterium; uncultured bacterium; uncultured bacterium	0.0	0.0	0.0	0.0	0.0	0.0	0.0	0.0	0.0	1.0	0.0	0.0	0.0	0.0	0.0	0.0	0.0	34.0	29.0	32.0	38.0	74.0	45.0	50.0	0.0	0.0	0.0	0.0
OTU349668669	Bacteria; Planctomycetes; Phycisphaerae; Phycisphaerales; Phycisphaeraceae; SM1A02; uncultured bacterium	0.0	0.0	0.0	0.0	0.0	0.0	0.0	0.0	0.0	47.0	393.0	0.0	0.0	0.0	0.0	0.0	0.0	0.0	0.0	0.0	0.0	0.0	0.0	0.0	0.0	0.0	0.0	0.0
OTU125629015	Bacteria; Ignavibacteriae; Ignavibacteria; Ignavibacteriales; PHOS-HE36	0.0	0.0	0.0	0.0	0.0	0.0	0.0	0.0	0.0	0.0	0.0	0.0	0.0	0.0	0.0	0.0	0.0	5.0	10.0	21.0	45.0	60.0	30.0	16.0	0.0	0.0	0.0	0.0
OTU70164146	Bacteria; Proteobacteria; Deltaproteobacteria; Bdellovibrionales; Bdellovibrionaceae; OM27 clade; uncultured bacterium	0.0	0.0	0.0	0.0	0.0	0.0	0.0	0.0	0.0	0.0	0.0	0.0	0.0	0.0	0.0	0.0	0.0	0.0	0.0	0.0	0.0	0.0	4.0	5.0	337.0	70.0	146.0	111.0
OTU623405337	Bacteria; Proteobacteria; Gammaproteobacteria; Acidiferrobacterales; Acidiferrobacteraceae; uncultured; uncultured bacterium	0.0	108.0	46.0	77.0	0.0	0.0	0.0	0.0	0.0	0.0	0.0	0.0	0.0	1.0	1.0	5.0	1.0	0.0	0.0	0.0	2.0	0.0	1.0	0.0	0.0	0.0	0.0	0.0
OTU244516420	Bacteria; Proteobacteria; Deltaproteobacteria; Bdellovibrionales; Bacteriovoracaceae; uncultured; uncultured bacterium	0.0	0.0	0.0	0.0	2.0	1.0	25.0	160.0	114.0	22.0	51.0	0.0	0.0	0.0	0.0	0.0	0.0	0.0	0.0	0.0	0.0	0.0	0.0	0.0	0.0	0.0	0.0	0.0
OTU652853931	Bacteria; Acidobacteria; Subgroup 17	0.0	0.0	0.0	0.0	0.0	0.0	0.0	0.0	0.0	0.0	0.0	0.0	0.0	0.0	0.0	0.0	0.0	0.0	0.0	0.0	0.0	0.0	1.0	0.0	239.0	5.0	24.0	59.0
OTU128775215	Bacteria; BRC1; uncultured organism; uncultured organism; uncultured organism; uncultured organism; uncultured organism	0.0	0.0	0.0	0.0	2.0	1.0	7.0	26.0	35.0	16.0	33.0	0.0	0.0	0.0	0.0	0.0	0.0	0.0	0.0	0.0	0.0	0.0	0.0	0.0	0.0	0.0	0.0	0.0
OTU984833160	Bacteria; Cloacimonetes; uncultured bacterium; uncultured bacterium; uncultured bacterium; uncultured bacterium; uncultured bacterium	0.0	0.0	0.0	0.0	0.0	0.0	2.0	137.0	41.0	0.0	5.0	0.0	0.0	0.0	0.0	0.0	0.0	0.0	0.0	0.0	0.0	0.0	0.0	0.0	0.0	0.0	0.0	0.0
OTU362949825	Bacteria; Planctomycetes; vadinHA49; uncultured bacterium; uncultured bacterium; uncultured bacterium; uncultured bacterium	0.0	0.0	0.0	0.0	0.0	0.0	0.0	0.0	0.0	0.0	0.0	0.0	0.0	0.0	0.0	0.0	0.0	0.0	0.0	0.0	0.0	0.0	0.0	0.0	465.0	4.0	51.0	120.0
OTU810645411	Bacteria; Bacteroidetes; SB-5; uncultured bacterium; uncultured bacterium; uncultured bacterium; uncultured bacterium	0.0	0.0	0.0	0.0	0.0	1.0	0.0	0.0	0.0	83.0	442.0	0.0	0.0	0.0	0.0	0.0	0.0	0.0	0.0	0.0	0.0	0.0	0.0	0.0	0.0	0.0	0.0	0.0
OTU687164297	Bacteria; Bacteroidetes; Flavobacteriia; Flavobacteriales; Flavobacteriaceae; Lutibacter; uncultured bacterium	0.0	0.0	0.0	0.0	0.0	0.0	0.0	0.0	0.0	0.0	0.0	0.0	0.0	0.0	0.0	0.0	0.0	0.0	0.0	0.0	1708.0	0.0	0.0	0.0	0.0	0.0	0.0	0.0
OTU420709159	Bacteria; Chloroflexi; Anaerolineae; Anaerolineales; Anaerolineaceae; uncultured; uncultured bacterium	0.0	0.0	0.0	0.0	23.0	33.0	63.0	1.0	403.0	13.0	60.0	0.0	0.0	0.0	0.0	0.0	0.0	0.0	0.0	0.0	0.0	0.0	0.0	0.0	0.0	0.0	0.0	0.0
OTU991679872	Bacteria; SBR1093; uncultured bacterium; uncultured bacterium; uncultured bacterium; uncultured bacterium; uncultured bacterium	0.0	0.0	0.0	0.0	0.0	0.0	0.0	0.0	0.0	0.0	0.0	0.0	0.0	0.0	0.0	1.0	0.0	0.0	0.0	0.0	0.0	0.0	0.0	0.0	105.0	10.0	13.0	135.0
OTU332057698	Bacteria; Peregrinibacteria; uncultured organism; uncultured organism; uncultured organism; uncultured organism; uncultured organism	0.0	1.0	1.0	0.0	13.0	19.0	50.0	225.0	262.0	4.0	3.0	0.0	0.0	0.0	0.0	0.0	0.0	0.0	0.0	0.0	0.0	0.0	0.0	0.0	0.0	0.0	0.0	0.0
OTU585719128	Bacteria; Verrucomicrobia; WCHB1-41; uncultured bacterium; uncultured bacterium; uncultured bacterium; uncultured bacterium	0.0	0.0	0.0	0.0	3.0	10.0	18.0	26.0	26.0	34.0	25.0	0.0	0.0	0.0	0.0	0.0	0.0	0.0	0.0	0.0	0.0	0.0	0.0	0.0	0.0	0.0	0.0	0.0
OTU598709948	Bacteria; Chloroflexi; KD4-96; uncultured bacterium; uncultured bacterium; uncultured bacterium; uncultured bacterium	0.0	0.0	0.0	0.0	0.0	0.0	0.0	0.0	0.0	0.0	0.0	0.0	0.0	0.0	0.0	1.0	0.0	0.0	0.0	0.0	0.0	0.0	0.0	0.0	45.0	207.0	16.0	17.0
OTU855463650	Bacteria; Planctomycetes; OM190; uncultured bacterium; uncultured bacterium; uncultured bacterium; uncultured bacterium	0.0	0.0	0.0	0.0	0.0	0.0	0.0	0.0	0.0	0.0	0.0	0.0	0.0	0.0	0.0	0.0	0.0	0.0	0.0	0.0	0.0	0.0	0.0	1.0	67.0	2.0	28.0	13.0
OTU369265514	Bacteria; Hydrogenedentes	0.0	0.0	0.0	0.0	1.0	3.0	21.0	137.0	123.0	20.0	6.0	0.0	0.0	0.0	0.0	0.0	0.0	0.0	0.0	0.0	0.0	0.0	0.0	0.0	0.0	0.0	0.0	0.0
OTU12431029	Bacteria; Proteobacteria; Deltaproteobacteria; Myxococcales; P3OB-42	0.0	0.0	0.0	0.0	69.0	58.0	3.0	30.0	19.0	1.0	0.0	0.0	0.0	0.0	0.0	0.0	0.0	0.0	0.0	0.0	0.0	0.0	0.0	0.0	0.0	0.0	0.0	0.0
OTU297971909	Bacteria; Elusimicrobia; Elusimicrobia; HydGH-Bac75; uncultured bacterium; uncultured bacterium; uncultured bacterium	2.0	3.0	0.0	1.0	0.0	0.0	0.0	0.0	0.0	0.0	0.0	0.0	0.0	0.0	0.0	0.0	0.0	101.0	63.0	53.0	185.0	231.0	60.0	40.0	0.0	0.0	0.0	0.0
OTU841917493	Bacteria; Bacteroidetes; Bacteroidia; Bacteroidales; Rikenellaceae; Blvii28 wastewater-sludge group	0.0	0.0	0.0	0.0	5.0	3.0	2.0	298.0	0.0	2.0	3.0	0.0	0.0	0.0	0.0	0.0	0.0	0.0	0.0	0.0	0.0	0.0	0.0	0.0	0.0	0.0	0.0	0.0
OTU316241343	Bacteria; Spirochaetae; Spirochaetes; Spirochaetales; Spirochaetaceae; uncultured; uncultured Spirochaetes bacterium	0.0	1.0	0.0	0.0	7.0	13.0	8.0	99.0	1.0	47.0	41.0	0.0	0.0	0.0	0.0	0.0	0.0	0.0	2.0	0.0	0.0	0.0	0.0	0.0	0.0	0.0	0.0	0.0
OTU219698253	Bacteria; Tenericutes; Mollicutes; Acholeplasmatales; Acholeplasmataceae; Acholeplasma; Ambiguous_taxa	8.0	7.0	13.0	8.0	0.0	0.0	0.0	0.0	0.0	0.0	0.0	7.0	57.0	25.0	0.0	2.0	0.0	0.0	0.0	0.0	0.0	0.0	0.0	0.0	0.0	0.0	0.0	0.0
OTU941650782	Bacteria; Proteobacteria; Deltaproteobacteria; Desulfurellales; Desulfurellaceae; H16; uncultured bacterium	0.0	0.0	0.0	0.0	0.0	0.0	0.0	0.0	0.0	1.0	0.0	0.0	0.0	0.0	0.0	0.0	0.0	0.0	0.0	0.0	0.0	0.0	1.0	2.0	5.0	31.0	44.0	39.0
OTU431839737	Bacteria; Planctomycetes; Phycisphaerae; Phycisphaerales; Phycisphaeraceae; AKYG587; uncultured bacterium	0.0	0.0	0.0	0.0	0.0	0.0	0.0	0.0	0.0	0.0	0.0	0.0	0.0	0.0	0.0	0.0	0.0	0.0	0.0	0.0	0.0	0.0	0.0	0.0	318.0	588.0	12.0	16.0
OTU269899147	Bacteria; Hydrogenedentes	0.0	0.0	0.0	0.0	0.0	2.0	2.0	149.0	18.0	4.0	1.0	0.0	0.0	0.0	0.0	0.0	0.0	0.0	0.0	0.0	0.0	0.0	0.0	0.0	0.0	0.0	0.0	0.0
OTU571796691	Bacteria; Proteobacteria; Alphaproteobacteria; Rhodospirillales; JG37-AG-20; uncultured bacterium; uncultured bacterium	1.0	0.0	0.0	0.0	0.0	0.0	0.0	0.0	0.0	0.0	0.0	0.0	0.0	0.0	0.0	1.0	0.0	0.0	0.0	0.0	0.0	0.0	2.0	0.0	0.0	0.0	62.0	57.0
OTU226712670	Bacteria; Cyanobacteria; Melainabacteria; Obscuribacterales; uncultured bacterium; uncultured bacterium; uncultured bacterium	0.0	0.0	0.0	0.0	0.0	0.0	0.0	0.0	0.0	0.0	0.0	0.0	0.0	0.0	0.0	0.0	0.0	0.0	0.0	0.0	0.0	0.0	0.0	2.0	5.0	0.0	13.0	140.0
OTU48100948	Bacteria; Verrucomicrobia; Spartobacteria; Chthoniobacterales; Xiphinematobacteraceae; Candidatus Xiphinematobacter; uncultured bacterium	0.0	0.0	0.0	0.0	0.0	0.0	0.0	1.0	0.0	0.0	0.0	0.0	0.0	0.0	0.0	0.0	0.0	0.0	0.0	0.0	0.0	0.0	0.0	0.0	30.0	67.0	39.0	17.0
OTU272124862	Bacteria; Bacteroidetes; Sphingobacteriia; Sphingobacteriales; env.OPS 17; uncultured bacterium; uncultured bacterium	0.0	0.0	0.0	0.0	0.0	0.0	0.0	0.0	0.0	0.0	0.0	0.0	0.0	0.0	0.0	0.0	0.0	0.0	0.0	0.0	0.0	0.0	0.0	0.0	213.0	37.0	0.0	16.0
OTU499342578	Bacteria; Proteobacteria; Alphaproteobacteria; Rickettsiales; SM2D12; uncultured bacterium; uncultured bacterium	0.0	0.0	0.0	0.0	2.0	1.0	0.0	4.0	1.0	1.0	0.0	0.0	0.0	0.0	0.0	0.0	0.0	0.0	0.0	0.0	0.0	0.0	1.0	0.0	225.0	12.0	15.0	19.0
OTU115979567	Bacteria; Planctomycetes; Planctomycetacia; Planctomycetales; Planctomycetaceae; Pirellula	0.0	0.0	0.0	1.0	0.0	0.0	0.0	0.0	0.0	0.0	0.0	0.0	0.0	0.0	0.0	1.0	0.0	0.0	0.0	0.0	0.0	0.0	0.0	0.0	70.0	104.0	4.0	8.0
OTU369536461	Bacteria; Bacteroidetes; Cytophagia; Cytophagales; Flammeovirgaceae; Ekhidna	0.0	0.0	0.0	0.0	0.0	0.0	0.0	0.0	0.0	0.0	0.0	0.0	0.0	0.0	0.0	0.0	0.0	0.0	0.0	0.0	0.0	0.0	1.0	0.0	293.0	20.0	15.0	27.0
OTU498535647	Bacteria; Firmicutes; Clostridia; Clostridiales; Ruminococcaceae; Ruminiclostridium 1; uncultured bacterium	0.0	0.0	0.0	0.0	0.0	0.0	189.0	156.0	1399.0	2.0	20.0	0.0	0.0	0.0	0.0	0.0	0.0	0.0	0.0	0.0	0.0	0.0	0.0	0.0	0.0	0.0	0.0	0.0
OTU899898645	Bacteria; Proteobacteria; Deltaproteobacteria; Desulfobacterales; Desulfobulbaceae; Desulfocapsa; uncultured bacterium	0.0	0.0	1.0	0.0	15.0	4.0	24.0	100.0	447.0	1.0	3.0	0.0	0.0	0.0	0.0	0.0	0.0	0.0	0.0	0.0	0.0	0.0	0.0	0.0	0.0	0.0	0.0	0.0
OTU719724005	Bacteria; Bacteroidetes; Cytophagia; Cytophagales; Cytophagaceae; uncultured	0.0	0.0	0.0	0.0	0.0	0.0	0.0	0.0	0.0	1.0	0.0	0.0	0.0	0.0	0.0	0.0	0.0	0.0	0.0	0.0	0.0	0.0	1.0	1.0	574.0	48.0	155.0	291.0
OTU60549942	Bacteria; Proteobacteria; Deltaproteobacteria; Desulfurellales; Desulfurellaceae; H16; uncultured bacterium	0.0	0.0	0.0	3.0	0.0	0.0	0.0	0.0	0.0	0.0	0.0	0.0	0.0	0.0	0.0	7.0	0.0	0.0	0.0	0.0	0.0	0.0	0.0	0.0	231.0	189.0	10.0	2.0
OTU764019320	Bacteria; Cyanobacteria; Melainabacteria; Caenarcaniphilales	0.0	0.0	0.0	0.0	0.0	0.0	12.0	79.0	20.0	0.0	0.0	0.0	0.0	0.0	0.0	0.0	0.0	0.0	0.0	0.0	0.0	0.0	0.0	0.0	0.0	0.0	0.0	0.0
OTU106696223	Bacteria; Spirochaetae; Spirochaetes; Spirochaetales; Brevinemataceae; Brevinema; uncultured organism	0.0	0.0	0.0	0.0	39.0	47.0	73.0	1925.0	1388.0	3.0	15.0	0.0	0.0	0.0	0.0	0.0	0.0	0.0	0.0	0.0	0.0	0.0	0.0	0.0	0.0	0.0	0.0	0.0
OTU308849066	Bacteria; Bacteroidetes; Sphingobacteriia; Sphingobacteriales; Lentimicrobiaceae; uncultured Bacteroidetes bacterium; uncultured Bacteroidetes bacterium	0.0	0.0	0.0	2.0	0.0	0.0	0.0	0.0	0.0	0.0	0.0	0.0	0.0	0.0	0.0	0.0	0.0	35.0	34.0	1.0	46.0	28.0	4.0	6.0	0.0	0.0	0.0	0.0
OTU902840791	Bacteria; Proteobacteria; Deltaproteobacteria; Desulfobacterales; Desulfobacteraceae; uncultured; uncultured bacterium	0.0	0.0	0.0	0.0	0.0	2.0	35.0	18.0	158.0	3.0	6.0	0.0	0.0	0.0	0.0	0.0	0.0	0.0	0.0	0.0	0.0	0.0	0.0	0.0	0.0	0.0	0.0	0.0
OTU117682199	Bacteria; Proteobacteria; Alphaproteobacteria; Caulobacterales; Hyphomonadaceae; Hirschia	0.0	0.0	0.0	0.0	0.0	1.0	23.0	12.0	10.0	7.0	7.0	0.0	0.0	0.0	0.0	0.0	0.0	0.0	0.0	0.0	0.0	0.0	2.0	2.0	177.0	68.0	99.0	173.0
OTU696743772	Bacteria; Chlorobi; Chlorobia; Chlorobiales; SJA-28; uncultured bacterium; uncultured bacterium	0.0	0.0	0.0	0.0	19.0	21.0	20.0	441.0	360.0	134.0	174.0	0.0	0.0	0.0	0.0	0.0	0.0	0.0	1.0	0.0	0.0	0.0	0.0	0.0	0.0	0.0	0.0	0.0
OTU317850565	Bacteria; Bacteroidetes; Bacteroidia; Bacteroidales; Prolixibacteraceae; BSV13; uncultured bacterium	0.0	0.0	0.0	0.0	20.0	41.0	27.0	876.0	422.0	5.0	5.0	0.0	0.0	0.0	0.0	0.0	0.0	0.0	0.0	0.0	0.0	0.0	0.0	0.0	0.0	0.0	0.0	0.0
OTU465795542	Bacteria; Bacteroidetes; Sphingobacteriia; Sphingobacteriales; Saprospiraceae; uncultured; uncultured bacterium	0.0	0.0	0.0	0.0	155.0	291.0	33.0	123.0	74.0	15.0	44.0	0.0	0.0	0.0	0.0	0.0	0.0	0.0	0.0	0.0	0.0	0.0	0.0	0.0	0.0	0.0	0.0	0.0
OTU826161506	Bacteria; Planctomycetes; Phycisphaerae; Phycisphaerales; Phycisphaeraceae; SM1A02; uncultured bacterium	0.0	0.0	0.0	0.0	0.0	0.0	0.0	0.0	0.0	0.0	0.0	0.0	0.0	0.0	0.0	0.0	0.0	0.0	0.0	0.0	0.0	0.0	0.0	0.0	4.0	3.0	65.0	44.0
OTU897293564	Bacteria; Proteobacteria; Alphaproteobacteria; Caulobacterales; Caulobacteraceae; Asticcacaulis	1.0	2.0	1.0	0.0	36.0	40.0	49.0	337.0	447.0	0.0	14.0	5.0	7.0	3.0	0.0	0.0	0.0	0.0	0.0	2.0	114.0	1.0	1.0	2.0	0.0	0.0	0.0	0.0
OTU937795805	Bacteria; Chloroflexi; Thermomicrobia; AKYG1722	0.0	0.0	0.0	0.0	0.0	0.0	0.0	0.0	0.0	0.0	0.0	0.0	0.0	0.0	0.0	1.0	0.0	0.0	0.0	0.0	0.0	0.0	0.0	0.0	147.0	95.0	30.0	156.0
OTU318564073	Bacteria; Planctomycetes; vadinHA49; uncultured bacterium; uncultured bacterium; uncultured bacterium; uncultured bacterium	0.0	1.0	0.0	0.0	6.0	11.0	17.0	6.0	123.0	1.0	0.0	0.0	0.0	0.0	0.0	0.0	0.0	0.0	0.0	0.0	9.0	0.0	0.0	0.0	0.0	0.0	0.0	0.0
OTU174661567	Bacteria; Bacteroidetes; Flavobacteriia; Flavobacteriales; NS9 marine group; uncultured bacterium; uncultured bacterium	0.0	0.0	0.0	0.0	0.0	0.0	0.0	0.0	0.0	0.0	0.0	0.0	0.0	0.0	0.0	0.0	0.0	0.0	0.0	0.0	0.0	0.0	0.0	0.0	211.0	11.0	8.0	328.0
OTU727205830	Bacteria; Planctomycetes; Planctomycetacia; Planctomycetales; Planctomycetaceae; Pirellula	0.0	0.0	0.0	1.0	0.0	0.0	0.0	0.0	0.0	0.0	0.0	0.0	0.0	0.0	0.0	3.0	0.0	0.0	0.0	0.0	0.0	0.0	2.0	3.0	44.0	48.0	120.0	215.0
OTU502880872	Unassigned	0.0	0.0	0.0	0.0	0.0	0.0	0.0	0.0	0.0	0.0	0.0	0.0	0.0	0.0	0.0	0.0	0.0	0.0	0.0	0.0	0.0	0.0	0.0	0.0	196.0	6.0	0.0	0.0
OTU754585982	Bacteria; Proteobacteria; Gammaproteobacteria; Chromatiales; Chromatiaceae; Rheinheimera; Ambiguous_taxa	0.0	337.0	0.0	1.0	0.0	0.0	0.0	0.0	0.0	0.0	0.0	0.0	0.0	26.0	0.0	0.0	0.0	0.0	0.0	0.0	0.0	0.0	0.0	0.0	0.0	0.0	0.0	0.0
OTU869058223	Unassigned	0.0	0.0	0.0	0.0	0.0	0.0	0.0	0.0	0.0	91.0	102.0	0.0	0.0	0.0	0.0	0.0	0.0	0.0	0.0	0.0	0.0	0.0	0.0	0.0	0.0	0.0	0.0	0.0
OTU284861444	Bacteria; Proteobacteria; Deltaproteobacteria; Bdellovibrionales; Bacteriovoracaceae; uncultured; uncultured bacterium	0.0	1.0	0.0	0.0	0.0	0.0	0.0	0.0	0.0	0.0	0.0	0.0	0.0	0.0	0.0	0.0	0.0	10.0	12.0	56.0	657.0	255.0	18.0	16.0	0.0	0.0	0.0	0.0
OTU361509448	Bacteria; Chloroflexi; Thermoflexia; Thermoflexales; Thermoflexaceae; Thermoflexus; uncultured bacterium	1.0	3.0	0.0	0.0	0.0	0.0	0.0	0.0	0.0	0.0	0.0	0.0	0.0	0.0	0.0	0.0	0.0	6.0	3.0	94.0	114.0	628.0	273.0	208.0	0.0	0.0	0.0	0.0
OTU941528210	Bacteria; Verrucomicrobia; WCHB1-41; uncultured bacterium; uncultured bacterium; uncultured bacterium; uncultured bacterium	0.0	0.0	0.0	0.0	2.0	12.0	10.0	31.0	38.0	10.0	13.0	0.0	0.0	0.0	0.0	0.0	0.0	0.0	0.0	0.0	0.0	0.0	0.0	0.0	0.0	0.0	0.0	0.0
OTU238897445	Bacteria; Proteobacteria; Deltaproteobacteria; Sva0485; uncultured bacterium; uncultured bacterium; uncultured bacterium	0.0	0.0	0.0	0.0	0.0	0.0	0.0	0.0	0.0	0.0	0.0	0.0	0.0	0.0	0.0	0.0	0.0	29.0	27.0	9.0	60.0	82.0	22.0	8.0	0.0	0.0	0.0	0.0
OTU922874529	Archaea; Woesearchaeota (DHVEG-6); uncultured euryarchaeote; uncultured euryarchaeote; uncultured euryarchaeote; uncultured euryarchaeote; uncultured euryarchaeote	0.0	0.0	0.0	0.0	0.0	0.0	0.0	0.0	0.0	0.0	0.0	0.0	0.0	0.0	0.0	0.0	0.0	0.0	0.0	0.0	0.0	0.0	1.0	1.0	79.0	9.0	40.0	217.0
OTU832728890	Bacteria; Bacteroidetes; Sphingobacteriia; Sphingobacteriales; Saprospiraceae; Lewinella; uncultured bacterium	0.0	0.0	0.0	0.0	72.0	103.0	158.0	721.0	605.0	1.0	3.0	0.0	0.0	0.0	0.0	0.0	0.0	0.0	0.0	0.0	0.0	0.0	0.0	0.0	0.0	0.0	0.0	0.0
OTU451355517	Bacteria; Planctomycetes; Phycisphaerae; mle1-8; uncultured bacterium; uncultured bacterium; uncultured bacterium	0.0	0.0	0.0	0.0	0.0	0.0	0.0	0.0	0.0	0.0	0.0	0.0	0.0	0.0	0.0	0.0	0.0	10.0	9.0	11.0	47.0	55.0	5.0	4.0	0.0	0.0	0.0	0.0
OTU329432235	Bacteria; Chloroflexi; Anaerolineae; Anaerolineales; Anaerolineaceae; uncultured; uncultured Chloroflexi bacterium	0.0	0.0	0.0	0.0	0.0	0.0	1.0	0.0	0.0	40.0	87.0	0.0	0.0	0.0	0.0	0.0	0.0	0.0	0.0	0.0	0.0	0.0	0.0	0.0	120.0	0.0	0.0	0.0
OTU337920541	Bacteria; Planctomycetes; Phycisphaerae; CCM11a	0.0	0.0	0.0	0.0	0.0	0.0	0.0	0.0	0.0	0.0	1.0	0.0	0.0	0.0	0.0	0.0	0.0	0.0	0.0	0.0	0.0	0.0	9.0	3.0	130.0	43.0	245.0	318.0
OTU827501528	Bacteria; Proteobacteria; Alphaproteobacteria; Rhodospirillales; Acetobacteraceae	0.0	0.0	0.0	0.0	0.0	0.0	1.0	0.0	0.0	0.0	0.0	0.0	0.0	0.0	0.0	0.0	0.0	0.0	0.0	0.0	2.0	0.0	0.0	0.0	213.0	0.0	0.0	0.0
OTU788153879	Bacteria; Bacteroidetes; Sphingobacteriia; Sphingobacteriales; KD1-131; uncultured bacterium; uncultured bacterium	0.0	0.0	2.0	0.0	5.0	3.0	12.0	67.0	19.0	48.0	22.0	0.0	0.0	0.0	0.0	0.0	0.0	0.0	0.0	0.0	0.0	0.0	0.0	0.0	0.0	0.0	0.0	0.0
OTU874817802	Bacteria; Acidobacteria; Solibacteres; Solibacterales; Solibacteraceae (Subgroup 3); Bryobacter	0.0	0.0	0.0	0.0	0.0	0.0	0.0	0.0	0.0	0.0	0.0	0.0	0.0	0.0	0.0	0.0	0.0	0.0	0.0	0.0	0.0	0.0	0.0	0.0	31.0	13.0	34.0	45.0
OTU93809094	Bacteria; Proteobacteria; Gammaproteobacteria; Methylococcales	0.0	0.0	0.0	0.0	2.0	2.0	0.0	0.0	0.0	0.0	0.0	0.0	0.0	0.0	0.0	0.0	0.0	0.0	0.0	0.0	0.0	0.0	11.0	3.0	362.0	5412.0	366.0	551.0
OTU237633361	Bacteria; RBG-1 (Zixibacteria)	0.0	1.0	0.0	0.0	0.0	0.0	0.0	0.0	0.0	0.0	0.0	0.0	0.0	0.0	0.0	0.0	0.0	16.0	14.0	19.0	94.0	135.0	6.0	10.0	0.0	0.0	0.0	0.0
OTU71730298	Bacteria; Proteobacteria; Gammaproteobacteria; Chromatiales; Ectothiorhodospiraceae; Thioalkalispira	0.0	0.0	0.0	0.0	0.0	0.0	0.0	0.0	0.0	15.0	266.0	0.0	0.0	0.0	0.0	0.0	0.0	0.0	0.0	0.0	0.0	0.0	0.0	0.0	0.0	0.0	0.0	0.0
OTU716424151	Bacteria; Cyanobacteria; ML635J-21; uncultured organism; uncultured organism; uncultured organism; uncultured organism	0.0	0.0	0.0	0.0	4.0	2.0	174.0	3394.0	2241.0	5.0	23.0	0.0	0.0	0.0	0.0	0.0	0.0	0.0	0.0	0.0	0.0	0.0	0.0	0.0	0.0	0.0	0.0	0.0
OTU130506891	Bacteria; Planctomycetes; Phycisphaerae; mle1-8; uncultured bacterium; uncultured bacterium; uncultured bacterium	0.0	1.0	0.0	0.0	0.0	0.0	0.0	0.0	0.0	0.0	0.0	0.0	0.0	0.0	0.0	0.0	0.0	7.0	5.0	20.0	77.0	116.0	15.0	15.0	0.0	0.0	0.0	0.0
OTU744468431	Bacteria; Latescibacteria; uncultured bacterium; uncultured bacterium; uncultured bacterium; uncultured bacterium; uncultured bacterium	0.0	0.0	0.0	0.0	0.0	0.0	0.0	0.0	0.0	0.0	0.0	0.0	0.0	0.0	0.0	0.0	0.0	0.0	0.0	0.0	0.0	0.0	0.0	0.0	448.0	352.0	11.0	7.0
OTU325870010	Unassigned	0.0	0.0	0.0	0.0	0.0	1.0	13.0	5.0	102.0	3.0	4.0	0.0	0.0	0.0	0.0	0.0	0.0	0.0	0.0	0.0	0.0	0.0	0.0	0.0	0.0	0.0	0.0	0.0
OTU678116052	Bacteria; BRC1; uncultured organism; uncultured organism; uncultured organism; uncultured organism; uncultured organism	0.0	0.0	0.0	0.0	0.0	0.0	0.0	0.0	0.0	0.0	0.0	0.0	0.0	0.0	0.0	0.0	0.0	0.0	0.0	0.0	0.0	0.0	4.0	1.0	184.0	627.0	130.0	148.0
OTU596255187	Bacteria; Proteobacteria; Deltaproteobacteria; Oligoflexales; 0319-6G20	0.0	0.0	0.0	0.0	2.0	2.0	12.0	131.0	118.0	8.0	19.0	0.0	0.0	0.0	0.0	0.0	0.0	0.0	0.0	0.0	0.0	0.0	0.0	0.0	0.0	0.0	0.0	0.0
OTU790886085	Bacteria; Proteobacteria; Alphaproteobacteria; Caulobacterales; Caulobacteraceae; Brevundimonas; uncultured bacterium	0.0	3.0	0.0	1.0	0.0	0.0	0.0	0.0	0.0	0.0	0.0	0.0	0.0	2.0	0.0	0.0	1.0	0.0	0.0	0.0	613.0	0.0	0.0	0.0	0.0	0.0	0.0	0.0
OTU869395361	Bacteria; Proteobacteria; Deltaproteobacteria; Bradymonadales	0.0	0.0	0.0	0.0	13.0	10.0	0.0	1.0	1.0	0.0	0.0	0.0	0.0	0.0	0.0	0.0	0.0	0.0	0.0	0.0	0.0	0.0	0.0	0.0	27.0	51.0	5.0	15.0
OTU536696776	Bacteria; Cyanobacteria; ML635J-21; uncultured bacterium; uncultured bacterium; uncultured bacterium; uncultured bacterium	0.0	0.0	0.0	0.0	0.0	0.0	14.0	122.0	131.0	17.0	14.0	0.0	0.0	0.0	0.0	0.0	0.0	0.0	0.0	0.0	0.0	0.0	0.0	0.0	0.0	0.0	0.0	0.0
OTU638853995	Bacteria; Proteobacteria; Gammaproteobacteria; Methylococcales; Methylococcaceae; Methyloparacoccus	0.0	0.0	0.0	0.0	216.0	77.0	0.0	0.0	1.0	0.0	0.0	0.0	0.0	0.0	0.0	0.0	0.0	0.0	0.0	0.0	0.0	0.0	0.0	0.0	0.0	0.0	0.0	0.0
OTU982694044	Bacteria; Planctomycetes; vadinHA49; uncultured bacterium; uncultured bacterium; uncultured bacterium; uncultured bacterium	0.0	0.0	0.0	0.0	0.0	0.0	0.0	0.0	0.0	0.0	0.0	0.0	0.0	0.0	0.0	1.0	0.0	0.0	0.0	0.0	0.0	0.0	1.0	0.0	23.0	10.0	133.0	50.0
OTU111916390	Bacteria; Proteobacteria; Deltaproteobacteria; Syntrophobacterales; Syntrophaceae; Desulfobacca	0.0	1.0	1.0	1.0	0.0	0.0	0.0	0.0	0.0	0.0	0.0	0.0	0.0	0.0	0.0	0.0	0.0	8.0	12.0	6.0	30.0	80.0	10.0	11.0	0.0	0.0	0.0	0.0
OTU647659255	Bacteria; Firmicutes; Clostridia; Clostridiales; Family XIII; Anaerovorax	0.0	1.0	1.0	0.0	1.0	1.0	0.0	123.0	0.0	0.0	0.0	0.0	0.0	0.0	0.0	0.0	0.0	0.0	0.0	0.0	0.0	0.0	0.0	0.0	0.0	0.0	0.0	0.0
OTU763394853	Bacteria; Gemmatimonadetes; Gemmatimonadetes; Gemmatimonadales; Gemmatimonadaceae; uncultured; Ambiguous_taxa	0.0	1.0	0.0	3.0	0.0	0.0	0.0	0.0	0.0	0.0	0.0	0.0	0.0	0.0	0.0	1.0	0.0	0.0	0.0	0.0	0.0	0.0	0.0	0.0	276.0	370.0	7.0	12.0
OTU299612788	Bacteria; SR1 (Absconditabacteria); Ambiguous_taxa; Ambiguous_taxa; Ambiguous_taxa; Ambiguous_taxa; Ambiguous_taxa	0.0	1.0	1.0	0.0	8.0	18.0	57.0	140.0	138.0	6.0	48.0	0.0	0.0	0.0	0.0	0.0	0.0	0.0	0.0	0.0	0.0	0.0	0.0	0.0	0.0	0.0	0.0	0.0
OTU549213797	Bacteria; Spirochaetae; Spirochaetes; Spirochaetales; Spirochaetaceae; Treponema; Ambiguous_taxa	0.0	0.0	0.0	0.0	20.0	31.0	62.0	604.0	333.0	24.0	38.0	0.0	0.0	0.0	0.0	0.0	0.0	0.0	0.0	0.0	0.0	0.0	0.0	0.0	0.0	0.0	0.0	0.0
OTU927691667	Bacteria; Proteobacteria; Deltaproteobacteria; Bdellovibrionales; Bdellovibrionaceae; Bdellovibrio; uncultured bacterium	2.0	0.0	0.0	0.0	58.0	43.0	1.0	4.0	4.0	0.0	1.0	1.0	1.0	0.0	0.0	0.0	0.0	0.0	0.0	0.0	0.0	0.0	0.0	0.0	0.0	0.0	0.0	0.0
OTU162863331	Bacteria; Elusimicrobia; Elusimicrobia; Lineage I; Unknown Family; Candidatus Endomicrobium; uncultured bacterium	0.0	0.0	0.0	0.0	0.0	0.0	18.0	60.0	361.0	0.0	0.0	0.0	0.0	0.0	0.0	0.0	0.0	0.0	0.0	0.0	0.0	0.0	0.0	0.0	0.0	0.0	0.0	0.0
OTU721150518	Bacteria; Parcubacteria; Candidatus Moranbacteria; uncultured soil bacterium; uncultured soil bacterium; uncultured soil bacterium; uncultured soil bacterium	0.0	0.0	0.0	0.0	0.0	1.0	9.0	28.0	8.0	228.0	246.0	0.0	0.0	0.0	0.0	0.0	0.0	0.0	0.0	0.0	0.0	0.0	0.0	0.0	0.0	0.0	0.0	0.0
OTU26907213	Bacteria; Bacteroidetes; Cytophagia; Cytophagales; Cytophagaceae; uncultured	0.0	0.0	0.0	0.0	0.0	0.0	0.0	0.0	0.0	12.0	101.0	0.0	0.0	1.0	0.0	0.0	0.0	0.0	0.0	0.0	0.0	0.0	0.0	0.0	0.0	0.0	0.0	0.0
OTU117855795	Bacteria; Proteobacteria; Alphaproteobacteria; Alphaproteobacteria Incertae Sedis; uncultured; uncultured bacterium; uncultured bacterium	0.0	0.0	0.0	0.0	83.0	75.0	9.0	63.0	26.0	9.0	10.0	0.0	0.0	0.0	0.0	0.0	0.0	0.0	0.0	0.0	0.0	0.0	0.0	0.0	0.0	0.0	0.0	0.0
OTU484655576	Bacteria; Verrucomicrobia; WCHB1-41; uncultured bacterium; uncultured bacterium; uncultured bacterium; uncultured bacterium	0.0	0.0	0.0	0.0	3.0	2.0	2.0	11.0	6.0	84.0	81.0	0.0	0.0	0.0	0.0	0.0	0.0	0.0	0.0	0.0	0.0	0.0	0.0	0.0	0.0	0.0	0.0	0.0
OTU804006640	Bacteria; Proteobacteria; Alphaproteobacteria; Rhodospirillales; CCU22; uncultured bacterium; uncultured bacterium	0.0	0.0	0.0	0.0	3.0	4.0	9.0	25.0	51.0	101.0	232.0	0.0	0.0	0.0	0.0	0.0	0.0	0.0	0.0	0.0	0.0	0.0	0.0	0.0	0.0	0.0	0.0	0.0
OTU50001403	Bacteria; Planctomycetes; Planctomycetacia; Planctomycetales; Planctomycetaceae; uncultured; uncultured bacterium	0.0	0.0	0.0	0.0	0.0	0.0	0.0	0.0	0.0	0.0	0.0	0.0	0.0	0.0	0.0	0.0	0.0	0.0	0.0	0.0	0.0	0.0	0.0	1.0	86.0	48.0	15.0	24.0
OTU907364339	Bacteria; Bacteroidetes; Cytophagia; Cytophagales; Cytophagaceae; Chryseolinea	0.0	0.0	0.0	0.0	0.0	0.0	0.0	0.0	0.0	2.0	0.0	0.0	0.0	0.0	0.0	0.0	0.0	0.0	0.0	0.0	0.0	0.0	5.0	2.0	684.0	756.0	231.0	466.0
OTU286268700	Bacteria; Planctomycetes; Planctomycetacia; Planctomycetales; Planctomycetaceae; Planctomyces; uncultured bacterium	0.0	0.0	0.0	0.0	1.0	0.0	0.0	0.0	0.0	0.0	0.0	0.0	0.0	0.0	0.0	1.0	0.0	0.0	0.0	0.0	0.0	0.0	7.0	13.0	97.0	25.0	419.0	355.0
OTU633118637	Unassigned	0.0	0.0	1.0	0.0	0.0	0.0	0.0	0.0	0.0	0.0	0.0	0.0	0.0	0.0	0.0	0.0	0.0	3.0	4.0	10.0	41.0	83.0	3.0	2.0	0.0	0.0	0.0	0.0
OTU3199003	Bacteria; Planctomycetes; Planctomycetacia; Planctomycetales; Planctomycetaceae; uncultured; uncultured bacterium	0.0	0.0	0.0	0.0	0.0	0.0	0.0	0.0	0.0	0.0	0.0	0.0	0.0	2.0	0.0	0.0	0.0	0.0	0.0	0.0	0.0	0.0	1.0	1.0	14.0	8.0	54.0	67.0
OTU898659700	Bacteria; Planctomycetes; vadinHA49; uncultured bacterium; uncultured bacterium; uncultured bacterium; uncultured bacterium	0.0	0.0	0.0	0.0	0.0	0.0	0.0	0.0	0.0	0.0	0.0	0.0	0.0	0.0	0.0	0.0	0.0	0.0	0.0	0.0	0.0	0.0	0.0	0.0	42.0	16.0	7.0	78.0
OTU985566364	Bacteria; Acidobacteria; Solibacteres; Solibacterales; Solibacteraceae (Subgroup 3); Paludibaculum; uncultured bacterium	0.0	0.0	0.0	0.0	2.0	3.0	6.0	9.0	10.0	382.0	433.0	0.0	0.0	1.0	0.0	0.0	0.0	2.0	0.0	0.0	0.0	0.0	0.0	1.0	0.0	0.0	0.0	0.0
OTU516028557	Bacteria; Proteobacteria; Alphaproteobacteria; Caulobacterales; Hyphomonadaceae; Woodsholea; uncultured bacterium	0.0	0.0	0.0	0.0	0.0	0.0	0.0	0.0	0.0	0.0	0.0	0.0	0.0	0.0	1.0	0.0	0.0	0.0	0.0	0.0	0.0	0.0	1.0	8.0	690.0	1272.0	137.0	43.0
OTU201475139	Bacteria; Proteobacteria; Alphaproteobacteria; Rickettsiales; SM2D12; uncultured organism; uncultured organism	0.0	0.0	0.0	0.0	0.0	0.0	0.0	0.0	0.0	0.0	0.0	0.0	0.0	0.0	0.0	0.0	0.0	0.0	0.0	0.0	0.0	0.0	1.0	0.0	297.0	290.0	36.0	53.0
OTU607744666	Bacteria; Proteobacteria; Deltaproteobacteria; Desulfuromonadales; Geobacteraceae; Geobacter; Ambiguous_taxa	12.0	37.0	19.0	14.0	63.0	61.0	165.0	2722.0	1197.0	65.0	74.0	2.0	14.0	7.0	1.0	10.0	1.0	0.0	2.0	0.0	0.0	0.0	0.0	0.0	0.0	0.0	1.0	0.0
OTU950653056	Bacteria; Chloroflexi; S085; uncultured bacterium; uncultured bacterium; uncultured bacterium; uncultured bacterium	0.0	0.0	0.0	0.0	0.0	0.0	0.0	0.0	0.0	0.0	0.0	0.0	0.0	0.0	0.0	0.0	0.0	0.0	0.0	0.0	0.0	0.0	1.0	0.0	10.0	54.0	34.0	52.0
OTU30851412	Archaea; Woesearchaeota (DHVEG-6); uncultured euryarchaeote; uncultured euryarchaeote; uncultured euryarchaeote; uncultured euryarchaeote; uncultured euryarchaeote	0.0	0.0	0.0	0.0	0.0	5.0	14.0	109.0	38.0	1.0	6.0	0.0	0.0	0.0	0.0	0.0	0.0	0.0	0.0	0.0	0.0	0.0	0.0	0.0	0.0	0.0	0.0	0.0
OTU49926263	Bacteria; Proteobacteria; Deltaproteobacteria; NB1-j	0.0	0.0	0.0	0.0	0.0	0.0	0.0	0.0	0.0	0.0	0.0	0.0	0.0	0.0	0.0	0.0	0.0	0.0	0.0	0.0	0.0	0.0	2.0	2.0	3.0	32.0	59.0	55.0
OTU355950831	Bacteria; Chloroflexi; Dehalococcoidia; MSBL5; uncultured bacterium; uncultured bacterium; uncultured bacterium	0.0	2.0	1.0	1.0	0.0	0.0	0.0	0.0	0.0	0.0	0.0	0.0	0.0	0.0	0.0	0.0	0.0	31.0	19.0	18.0	43.0	40.0	9.0	12.0	0.0	0.0	0.0	0.0
OTU116665953	Unassigned	0.0	0.0	0.0	0.0	4.0	4.0	87.0	253.0	138.0	11.0	15.0	0.0	0.0	0.0	0.0	0.0	0.0	0.0	0.0	0.0	0.0	0.0	0.0	0.0	0.0	0.0	0.0	0.0
OTU133186015	Bacteria; Proteobacteria; Deltaproteobacteria; Desulfarculales; Desulfarculaceae; Desulfatiglans	0.0	0.0	0.0	0.0	0.0	0.0	0.0	0.0	0.0	3.0	1.0	0.0	0.0	0.0	0.0	0.0	0.0	102.0	97.0	23.0	57.0	39.0	54.0	42.0	0.0	0.0	0.0	0.0
OTU774513974	Bacteria; Acidobacteria; Subgroup 22; Ambiguous_taxa; Ambiguous_taxa; Ambiguous_taxa; Ambiguous_taxa	0.0	0.0	0.0	0.0	0.0	0.0	0.0	0.0	0.0	0.0	0.0	0.0	0.0	0.0	0.0	0.0	0.0	0.0	0.0	0.0	0.0	0.0	0.0	0.0	91.0	65.0	11.0	166.0
OTU983885293	Bacteria; Spirochaetae; Spirochaetes; Spirochaetales; Spirochaetaceae; uncultured; uncultured bacterium	0.0	0.0	0.0	0.0	11.0	10.0	6.0	44.0	54.0	88.0	115.0	0.0	0.0	0.0	0.0	0.0	0.0	0.0	0.0	0.0	0.0	0.0	0.0	0.0	0.0	0.0	0.0	0.0
OTU113116059	Bacteria; Parcubacteria; Candidatus Falkowbacteria; uncultured bacterium; uncultured bacterium; uncultured bacterium; uncultured bacterium	1.0	0.0	0.0	0.0	1.0	2.0	13.0	42.0	94.0	3.0	0.0	0.0	0.0	0.0	0.0	0.0	0.0	0.0	0.0	0.0	0.0	0.0	0.0	0.0	0.0	0.0	0.0	0.0
OTU140842921	Bacteria; Parcubacteria; uncultured bacterium; uncultured bacterium; uncultured bacterium; uncultured bacterium; uncultured bacterium	3.0	4.0	0.0	1.0	0.0	0.0	0.0	0.0	0.0	30.0	74.0	1.0	0.0	2.0	0.0	0.0	0.0	0.0	0.0	0.0	1.0	0.0	0.0	0.0	0.0	0.0	0.0	0.0
OTU918623099	Bacteria; Deferribacteres; Deferribacteres Incertae Sedis; Unknown Order; Unknown Family; Caldithrix; uncultured bacterium	0.0	0.0	0.0	0.0	0.0	0.0	0.0	0.0	0.0	0.0	0.0	0.0	0.0	0.0	0.0	0.0	0.0	51.0	51.0	37.0	155.0	232.0	29.0	26.0	0.0	0.0	0.0	0.0
OTU980958745	Bacteria; Nitrospirae; Nitrospira; Nitrospirales; Nitrospiraceae; Nitrospira; uncultured bacterium	0.0	1.0	0.0	4.0	0.0	0.0	0.0	0.0	0.0	0.0	0.0	0.0	0.0	0.0	0.0	2.0	0.0	0.0	0.0	0.0	0.0	0.0	5.0	4.0	409.0	40.0	414.0	630.0
OTU439872814	Bacteria; Acidobacteria; Blastocatellia; Blastocatellales; Blastocatellaceae (Subgroup 4)	0.0	6.0	1.0	2.0	0.0	0.0	0.0	0.0	0.0	0.0	0.0	0.0	0.0	3.0	0.0	5.0	0.0	0.0	0.0	0.0	0.0	0.0	2.0	2.0	92.0	123.0	71.0	270.0
OTU480060311	Bacteria; Proteobacteria; Deltaproteobacteria; Desulfobacterales; Desulfobulbaceae; uncultured	0.0	0.0	0.0	0.0	0.0	0.0	3.0	19.0	8.0	47.0	68.0	0.0	0.0	0.0	0.0	0.0	0.0	0.0	0.0	0.0	0.0	0.0	0.0	0.0	0.0	0.0	0.0	0.0
OTU41988119	Bacteria; Gemmatimonadetes; Gemmatimonadetes; Gemmatimonadales; Gemmatimonadaceae; uncultured	0.0	2.0	0.0	1.0	0.0	0.0	0.0	0.0	0.0	0.0	0.0	0.0	0.0	0.0	0.0	0.0	0.0	0.0	0.0	0.0	0.0	0.0	0.0	1.0	123.0	22.0	37.0	40.0
OTU742961807	Bacteria; Gracilibacteria; uncultured bacterium; uncultured bacterium; uncultured bacterium; uncultured bacterium; uncultured bacterium	0.0	0.0	0.0	0.0	1.0	0.0	25.0	153.0	225.0	0.0	2.0	0.0	0.0	0.0	0.0	0.0	1.0	0.0	0.0	0.0	0.0	0.0	0.0	0.0	0.0	0.0	0.0	0.0
OTU799757713	Bacteria; Planctomycetes; Phycisphaerae; Phycisphaerales; Phycisphaeraceae; SM1A02; uncultured bacterium	0.0	0.0	0.0	0.0	161.0	284.0	13.0	70.0	54.0	251.0	393.0	0.0	0.0	0.0	0.0	0.0	0.0	0.0	0.0	0.0	0.0	0.0	0.0	0.0	0.0	0.0	0.0	0.0
OTU506259336	Bacteria; Bacteroidetes; Sphingobacteriia; Sphingobacteriales; Sphingobacteriaceae; Sphingobacterium; Ambiguous_taxa	0.0	8.0	0.0	5.0	0.0	0.0	0.0	0.0	0.0	0.0	0.0	0.0	0.0	0.0	5434.0	4515.0	13493.0	0.0	0.0	0.0	0.0	0.0	0.0	1.0	0.0	0.0	0.0	2.0
OTU943262492	Bacteria; Chloroflexi; S085; uncultured bacterium; uncultured bacterium; uncultured bacterium; uncultured bacterium	0.0	1.0	0.0	1.0	0.0	0.0	0.0	0.0	0.0	0.0	0.0	0.0	0.0	0.0	0.0	0.0	0.0	13.0	7.0	7.0	33.0	72.0	18.0	5.0	0.0	0.0	0.0	0.0
OTU264995095	Bacteria; Proteobacteria; Deltaproteobacteria; Desulfovibrionales; Desulfovibrionaceae; Desulfovibrio; uncultured organism	0.0	0.0	0.0	0.0	0.0	0.0	0.0	9.0	3.0	257.0	273.0	0.0	0.0	0.0	0.0	0.0	0.0	0.0	0.0	0.0	0.0	0.0	0.0	0.0	0.0	0.0	0.0	0.0
OTU518729348	Bacteria; Acidobacteria; Subgroup 25; uncultured bacterium; uncultured bacterium; uncultured bacterium; uncultured bacterium	0.0	0.0	0.0	0.0	0.0	0.0	0.0	0.0	0.0	0.0	0.0	0.0	0.0	0.0	0.0	0.0	0.0	0.0	0.0	0.0	0.0	0.0	0.0	0.0	95.0	2.0	0.0	14.0
OTU116681421	Bacteria; Chloroflexi; Anaerolineae; Anaerolineales; Anaerolineaceae; uncultured; uncultured bacterium	0.0	0.0	0.0	0.0	0.0	0.0	0.0	0.0	0.0	0.0	0.0	0.0	0.0	0.0	0.0	3.0	0.0	0.0	0.0	0.0	0.0	0.0	1.0	1.0	132.0	11.0	22.0	52.0
OTU584714873	Bacteria; Bacteroidetes; Sphingobacteriia; Sphingobacteriales; Lentimicrobiaceae; Ambiguous_taxa; Ambiguous_taxa	50.0	163.0	106.0	72.0	4.0	1.0	0.0	0.0	0.0	0.0	0.0	758.0	656.0	24.0	3.0	20.0	4.0	3.0	1.0	0.0	0.0	0.0	0.0	0.0	0.0	0.0	0.0	0.0
OTU324164596	Bacteria; Proteobacteria; Deltaproteobacteria; Desulfovibrionales; Desulfovibrionaceae; Desulfovibrio; Ambiguous_taxa	0.0	0.0	2.0	0.0	2.0	3.0	10.0	96.0	86.0	7.0	17.0	0.0	0.0	0.0	0.0	0.0	0.0	0.0	0.0	0.0	0.0	0.0	0.0	0.0	0.0	0.0	0.0	0.0
OTU894241977	Bacteria; Bacteroidetes; Cytophagia; Cytophagales; Cytophagaceae; uncultured; uncultured bacterium	0.0	0.0	0.0	0.0	3.0	2.0	1.0	7.0	4.0	47.0	297.0	0.0	0.0	0.0	0.0	0.0	0.0	0.0	0.0	0.0	0.0	0.0	0.0	0.0	2.0	0.0	0.0	0.0
OTU195749130	Bacteria; Proteobacteria; Deltaproteobacteria; Desulfarculales; Desulfarculaceae; Desulfatiglans	0.0	0.0	0.0	0.0	0.0	0.0	0.0	0.0	0.0	0.0	0.0	0.0	0.0	0.0	0.0	0.0	0.0	1.0	4.0	12.0	21.0	64.0	20.0	16.0	0.0	0.0	0.0	0.0
OTU765757213	Bacteria; Proteobacteria; Deltaproteobacteria; Myxococcales; Haliangiaceae; Haliangium; uncultured bacterium	0.0	0.0	0.0	0.0	0.0	0.0	0.0	0.0	0.0	0.0	0.0	0.0	0.0	0.0	0.0	0.0	0.0	0.0	0.0	0.0	0.0	0.0	0.0	1.0	69.0	23.0	15.0	20.0
OTU943578922	Bacteria; Spirochaetae; Spirochaetes; Spirochaetales; Spirochaetaceae; Spirochaeta 2; uncultured bacterium	0.0	0.0	0.0	0.0	0.0	0.0	0.0	0.0	0.0	0.0	0.0	0.0	0.0	0.0	0.0	0.0	0.0	2.0	0.0	19.0	51.0	51.0	18.0	33.0	0.0	0.0	0.0	0.0
OTU691187118	Bacteria; Proteobacteria; Deltaproteobacteria; NB1-j; uncultured bacterium; uncultured bacterium; uncultured bacterium	0.0	0.0	0.0	0.0	0.0	0.0	0.0	0.0	0.0	0.0	0.0	0.0	0.0	0.0	0.0	0.0	0.0	0.0	0.0	0.0	0.0	0.0	2.0	2.0	34.0	5.0	52.0	124.0
OTU932155988	Bacteria; Proteobacteria; Deltaproteobacteria; Bradymonadales	0.0	0.0	0.0	0.0	1.0	0.0	8.0	3.0	141.0	7.0	15.0	0.0	0.0	0.0	0.0	0.0	0.0	0.0	0.0	0.0	0.0	0.0	0.0	0.0	0.0	0.0	0.0	0.0
OTU136008733	Bacteria; Planctomycetes; Phycisphaerae; Phycisphaerales; AKAU3564 sediment group	0.0	1.0	1.0	0.0	0.0	0.0	0.0	0.0	0.0	0.0	0.0	0.0	0.0	0.0	0.0	0.0	0.0	160.0	164.0	175.0	755.0	647.0	363.0	309.0	0.0	0.0	0.0	0.0
OTU565216534	Bacteria; Planctomycetes; OM190; uncultured bacterium; uncultured bacterium; uncultured bacterium; uncultured bacterium	0.0	0.0	0.0	0.0	0.0	0.0	0.0	0.0	0.0	0.0	0.0	0.0	0.0	0.0	0.0	0.0	0.0	0.0	0.0	0.0	0.0	0.0	1.0	2.0	13.0	1.0	140.0	101.0
OTU249947197	Bacteria; FCPU426; uncultured bacterium; uncultured bacterium; uncultured bacterium; uncultured bacterium; uncultured bacterium	0.0	0.0	0.0	0.0	0.0	0.0	0.0	0.0	0.0	0.0	0.0	0.0	0.0	0.0	0.0	0.0	0.0	11.0	17.0	15.0	72.0	49.0	54.0	27.0	0.0	0.0	0.0	0.0
OTU810435124	Bacteria; Verrucomicrobia; OPB35 soil group; uncultured bacterium; uncultured bacterium; uncultured bacterium; uncultured bacterium	0.0	0.0	0.0	0.0	0.0	0.0	0.0	0.0	0.0	1.0	9.0	0.0	0.0	0.0	0.0	0.0	0.0	2.0	2.0	0.0	0.0	3.0	7.0	3.0	335.0	34.0	310.0	409.0
OTU328629043	Bacteria; Proteobacteria; Epsilonproteobacteria; Campylobacterales; Helicobacteraceae; Sulfurimonas; Ambiguous_taxa	148.0	26.0	36.0	39.0	1.0	0.0	0.0	0.0	0.0	0.0	0.0	13.0	6.0	46.0	0.0	24.0	3.0	1.0	2.0	0.0	0.0	0.0	0.0	0.0	0.0	0.0	0.0	0.0
OTU996820788	Bacteria; Acidobacteria; Subgroup 9; Ambiguous_taxa; Ambiguous_taxa; Ambiguous_taxa; Ambiguous_taxa	0.0	0.0	0.0	0.0	0.0	0.0	0.0	0.0	0.0	0.0	0.0	0.0	0.0	0.0	0.0	0.0	0.0	0.0	0.0	0.0	0.0	0.0	2.0	1.0	27.0	57.0	81.0	115.0
OTU593953661	Bacteria; Bacteroidetes; WCHB1-32; uncultured bacterium; uncultured bacterium; uncultured bacterium; uncultured bacterium	0.0	0.0	0.0	0.0	14.0	8.0	17.0	8.0	57.0	188.0	280.0	0.0	0.0	0.0	0.0	0.0	0.0	0.0	0.0	0.0	1.0	0.0	0.0	0.0	0.0	0.0	0.0	0.0
OTU728898069	Bacteria; Chloroflexi; Anaerolineae; Anaerolineales; Anaerolineaceae; uncultured	0.0	0.0	0.0	0.0	0.0	1.0	0.0	0.0	0.0	0.0	0.0	0.0	0.0	0.0	0.0	0.0	0.0	0.0	0.0	0.0	0.0	0.0	2.0	4.0	1.0	15.0	57.0	39.0
OTU399619255	Bacteria; Chloroflexi; Anaerolineae; Anaerolineales; Anaerolineaceae; uncultured; uncultured bacterium	0.0	1.0	1.0	1.0	0.0	0.0	0.0	0.0	2.0	60.0	91.0	0.0	0.0	0.0	0.0	0.0	0.0	3.0	2.0	0.0	4.0	0.0	2.0	3.0	0.0	0.0	0.0	0.0
OTU420991660	Bacteria; Proteobacteria; Deltaproteobacteria; Myxococcales; Eel-36e1D6; uncultured bacterium; uncultured bacterium	0.0	0.0	0.0	0.0	0.0	0.0	0.0	0.0	0.0	0.0	0.0	0.0	0.0	0.0	0.0	0.0	0.0	0.0	0.0	0.0	0.0	0.0	0.0	0.0	90.0	78.0	0.0	0.0
OTU199043353	Bacteria; Chloroflexi; Anaerolineae; Anaerolineales; Anaerolineaceae; uncultured	0.0	0.0	0.0	0.0	0.0	0.0	0.0	0.0	0.0	0.0	0.0	0.0	0.0	0.0	0.0	0.0	0.0	0.0	0.0	0.0	0.0	0.0	3.0	10.0	191.0	92.0	608.0	638.0
OTU484304624	Bacteria; Proteobacteria; Gammaproteobacteria; Methylococcales; Methylococcaceae; Methyloparacoccus	0.0	0.0	0.0	0.0	286.0	130.0	12.0	14.0	32.0	1.0	3.0	0.0	0.0	0.0	0.0	0.0	0.0	0.0	0.0	0.0	0.0	0.0	0.0	0.0	0.0	0.0	0.0	0.0
OTU628795976	Bacteria; Cyanobacteria; Melainabacteria; Vampirovibrionales; uncultured bacterium; uncultured bacterium; uncultured bacterium	0.0	0.0	0.0	0.0	14.0	9.0	35.0	326.0	291.0	0.0	1.0	0.0	0.0	0.0	0.0	0.0	0.0	0.0	0.0	0.0	0.0	0.0	0.0	0.0	0.0	0.0	0.0	0.0
OTU415728832	Bacteria; Proteobacteria; Alphaproteobacteria; Rickettsiales; Holosporaceae; uncultured	0.0	2.0	0.0	0.0	1.0	3.0	0.0	14.0	16.0	1.0	6.0	0.0	0.0	0.0	0.0	1.0	0.0	0.0	0.0	0.0	0.0	0.0	0.0	1.0	50.0	47.0	11.0	31.0
OTU851326655	Bacteria; Proteobacteria; Deltaproteobacteria; Desulfobacterales; Desulfobulbaceae; Desulfocapsa	0.0	0.0	0.0	0.0	2.0	1.0	7.0	3.0	109.0	0.0	1.0	0.0	0.0	0.0	0.0	0.0	0.0	0.0	0.0	0.0	0.0	0.0	0.0	0.0	0.0	0.0	0.0	0.0
OTU419569572	Bacteria; SR1 (Absconditabacteria); Ambiguous_taxa; Ambiguous_taxa; Ambiguous_taxa; Ambiguous_taxa; Ambiguous_taxa	0.0	0.0	0.0	0.0	0.0	0.0	62.0	226.0	67.0	1.0	0.0	0.0	0.0	0.0	0.0	0.0	1.0	0.0	0.0	0.0	0.0	0.0	0.0	0.0	0.0	0.0	0.0	0.0
OTU678187731	Unassigned	0.0	0.0	0.0	0.0	0.0	0.0	0.0	0.0	0.0	0.0	0.0	0.0	0.0	0.0	0.0	0.0	0.0	0.0	0.0	0.0	0.0	0.0	3.0	2.0	18.0	1.0	100.0	65.0
OTU673602913	Bacteria; Bacteroidetes; WCHB1-32; uncultured bacterium; uncultured bacterium; uncultured bacterium; uncultured bacterium	0.0	0.0	0.0	0.0	16.0	7.0	29.0	433.0	284.0	267.0	222.0	0.0	0.0	0.0	0.0	0.0	0.0	0.0	0.0	0.0	1.0	0.0	0.0	0.0	0.0	0.0	0.0	0.0
OTU451833868	Bacteria; Chloroflexi; Dehalococcoidia; GIF9; uncultured bacterium; uncultured bacterium; uncultured bacterium	0.0	0.0	0.0	0.0	0.0	0.0	0.0	0.0	0.0	0.0	0.0	0.0	0.0	0.0	0.0	0.0	0.0	5.0	5.0	9.0	31.0	70.0	9.0	3.0	0.0	0.0	0.0	0.0
OTU524081602	Bacteria; Proteobacteria; Betaproteobacteria; Neisseriales; Neisseriaceae; Vogesella; uncultured bacterium	0.0	0.0	0.0	0.0	0.0	0.0	0.0	0.0	0.0	0.0	0.0	0.0	0.0	9.0	0.0	0.0	0.0	0.0	0.0	5.0	9.0	0.0	211.0	135.0	0.0	0.0	0.0	0.0
OTU945195460	Bacteria; Firmicutes; Bacilli; Bacillales; Paenibacillaceae; Paenibacillus	0.0	374.0	68.0	121.0	0.0	0.0	0.0	0.0	0.0	0.0	0.0	0.0	0.0	15.0	0.0	5.0	0.0	0.0	0.0	1.0	0.0	17.0	22.0	36.0	39.0	30.0	1.0	5.0
OTU427644127	Bacteria; Planctomycetes; Phycisphaerae; S-70; uncultured bacterium; uncultured bacterium; uncultured bacterium	0.0	0.0	0.0	0.0	0.0	0.0	0.0	0.0	0.0	0.0	0.0	0.0	0.0	0.0	0.0	0.0	0.0	0.0	0.0	0.0	0.0	0.0	2.0	9.0	193.0	168.0	255.0	270.0
OTU93916369	Bacteria; Chloroflexi; Anaerolineae; Anaerolineales; Anaerolineaceae; uncultured; uncultured bacterium	0.0	0.0	0.0	0.0	0.0	0.0	0.0	0.0	0.0	1.0	0.0	0.0	0.0	0.0	0.0	0.0	0.0	24.0	40.0	22.0	83.0	92.0	45.0	29.0	0.0	0.0	0.0	0.0
OTU761099259	Bacteria; Chloroflexi; Anaerolineae; Anaerolineales; Anaerolineaceae; uncultured; uncultured Chloroflexi bacterium	0.0	0.0	0.0	0.0	0.0	0.0	0.0	0.0	0.0	1.0	0.0	0.0	0.0	0.0	0.0	8.0	0.0	0.0	0.0	0.0	0.0	0.0	50.0	40.0	2161.0	1024.0	2244.0	3710.0
OTU563861647	Bacteria; Proteobacteria; Gammaproteobacteria	0.0	40.0	16.0	43.0	0.0	0.0	0.0	0.0	0.0	0.0	0.0	0.0	0.0	9.0	0.0	0.0	0.0	0.0	0.0	0.0	0.0	2.0	1.0	0.0	0.0	0.0	0.0	0.0
OTU166750000	Bacteria; Proteobacteria; Deltaproteobacteria; Syntrophobacterales; Syntrophaceae; Desulfomonile	1.0	1.0	1.0	1.0	0.0	0.0	0.0	0.0	0.0	0.0	0.0	0.0	0.0	0.0	0.0	0.0	0.0	19.0	21.0	18.0	29.0	73.0	40.0	26.0	0.0	0.0	0.0	0.0
OTU638383852	Bacteria; RBG-1 (Zixibacteria); uncultured Caldithrix sp.; uncultured Caldithrix sp.; uncultured Caldithrix sp.; uncultured Caldithrix sp.; uncultured Caldithrix sp.	0.0	1.0	0.0	0.0	0.0	0.0	0.0	0.0	0.0	0.0	0.0	0.0	0.0	0.0	0.0	0.0	0.0	17.0	14.0	42.0	116.0	151.0	28.0	17.0	0.0	0.0	0.0	0.0
OTU809634235	Bacteria; Proteobacteria; Betaproteobacteria; Hydrogenophilales; Hydrogenophilaceae; uncultured; uncultured bacterium	0.0	1.0	0.0	0.0	1.0	1.0	34.0	74.0	59.0	321.0	210.0	0.0	0.0	1.0	0.0	0.0	0.0	0.0	0.0	0.0	0.0	0.0	0.0	0.0	0.0	0.0	0.0	0.0
OTU598983109	Unassigned	0.0	0.0	0.0	0.0	1.0	0.0	8.0	198.0	136.0	3.0	6.0	0.0	0.0	0.0	0.0	0.0	0.0	0.0	0.0	0.0	0.0	0.0	0.0	0.0	0.0	0.0	0.0	0.0
OTU159272771	Bacteria; Proteobacteria; Betaproteobacteria; Hydrogenophilales; Hydrogenophilaceae; uncultured	55.0	0.0	2.0	3.0	32.0	25.0	49.0	131.0	72.0	154.0	144.0	0.0	2.0	22.0	0.0	0.0	0.0	0.0	1.0	0.0	0.0	0.0	0.0	0.0	0.0	0.0	0.0	0.0
OTU251835299	Bacteria; Actinobacteria; Thermoleophilia; Gaiellales; uncultured; uncultured bacterium; uncultured bacterium	0.0	0.0	0.0	0.0	0.0	0.0	0.0	0.0	0.0	0.0	0.0	0.0	0.0	0.0	0.0	0.0	0.0	0.0	0.0	0.0	0.0	0.0	0.0	0.0	31.0	102.0	0.0	0.0
OTU810539144	Bacteria; Proteobacteria; Betaproteobacteria; Hydrogenophilales; Hydrogenophilaceae; Thiobacillus; uncultured bacterium	18.0	41.0	12.0	51.0	1073.0	1047.0	151.0	1012.0	484.0	592.0	1048.0	8.0	1.0	13.0	4.0	4.0	0.0	7.0	18.0	2.0	3793.0	13.0	32.0	21.0	0.0	42.0	20.0	0.0
OTU145935968	Bacteria; Spirochaetae; Spirochaetes; Spirochaetales; Spirochaetaceae; Spirochaeta 2; uncultured bacterium	0.0	3.0	0.0	3.0	0.0	0.0	0.0	0.0	0.0	0.0	1.0	0.0	0.0	0.0	0.0	0.0	0.0	15.0	20.0	11.0	13.0	8.0	20.0	24.0	0.0	0.0	0.0	0.0
OTU457303005	Bacteria; Gemmatimonadetes; Gemmatimonadetes; Gemmatimonadales; Gemmatimonadaceae; uncultured	0.0	0.0	0.0	1.0	0.0	0.0	0.0	0.0	0.0	0.0	0.0	0.0	0.0	0.0	0.0	2.0	0.0	0.0	0.0	0.0	0.0	0.0	6.0	7.0	276.0	187.0	182.0	439.0
OTU210184857	Bacteria; Verrucomicrobia; WCHB1-41; uncultured bacterium; uncultured bacterium; uncultured bacterium; uncultured bacterium	0.0	0.0	0.0	0.0	0.0	1.0	6.0	174.0	27.0	0.0	0.0	0.0	0.0	0.0	0.0	0.0	0.0	0.0	0.0	0.0	0.0	0.0	0.0	0.0	0.0	0.0	0.0	0.0
OTU728703817	Bacteria; Deferribacteres; Deferribacteres Incertae Sedis; Unknown Order; Unknown Family; Caldithrix; uncultured bacterium	0.0	0.0	0.0	0.0	0.0	0.0	4.0	52.0	215.0	25.0	20.0	0.0	0.0	0.0	0.0	0.0	0.0	0.0	0.0	0.0	0.0	0.0	0.0	0.0	0.0	0.0	0.0	0.0
OTU58800653	Bacteria; Gemmatimonadetes; Gemmatimonadetes; Gemmatimonadales; Gemmatimonadaceae; uncultured; uncultured bacterium	0.0	0.0	0.0	0.0	0.0	0.0	0.0	0.0	0.0	0.0	0.0	0.0	0.0	0.0	0.0	0.0	0.0	0.0	0.0	0.0	0.0	0.0	0.0	0.0	88.0	8.0	21.0	27.0
OTU680567626	Bacteria; Acidobacteria; Subgroup 22	0.0	0.0	0.0	0.0	0.0	0.0	0.0	0.0	0.0	0.0	0.0	0.0	0.0	0.0	0.0	0.0	0.0	0.0	0.0	0.0	0.0	0.0	0.0	0.0	28.0	12.0	44.0	44.0
OTU138811908	Bacteria; Bacteroidetes; Bacteroidia; Bacteroidales; Marinilabiaceae; uncultured; uncultured bacterium	0.0	0.0	0.0	0.0	0.0	2.0	6.0	353.0	18.0	1.0	0.0	0.0	0.0	0.0	0.0	0.0	0.0	0.0	0.0	0.0	0.0	0.0	0.0	0.0	0.0	0.0	0.0	0.0
OTU616437986	Bacteria; Bacteroidetes; SB-5; uncultured organism; uncultured organism; uncultured organism; uncultured organism	0.0	0.0	0.0	0.0	0.0	0.0	0.0	0.0	0.0	136.0	127.0	0.0	0.0	0.0	0.0	0.0	0.0	0.0	0.0	0.0	0.0	0.0	0.0	0.0	0.0	0.0	0.0	0.0
OTU214497265	Bacteria; Chloroflexi; Anaerolineae; Anaerolineales; Anaerolineaceae; uncultured	0.0	0.0	1.0	0.0	0.0	0.0	0.0	0.0	0.0	0.0	0.0	0.0	0.0	0.0	0.0	1.0	0.0	9.0	18.0	3.0	21.0	44.0	12.0	5.0	0.0	0.0	0.0	0.0
OTU703681882	Bacteria; Verrucomicrobia; MSBL3	0.0	0.0	0.0	0.0	1.0	0.0	20.0	294.0	60.0	1.0	3.0	0.0	0.0	0.0	0.0	0.0	0.0	0.0	0.0	0.0	0.0	0.0	0.0	0.0	0.0	0.0	0.0	0.0
OTU45921735	Bacteria; Spirochaetae; Spirochaetes; Spirochaetales; Leptospiraceae; uncultured; uncultured bacterium	0.0	0.0	0.0	0.0	0.0	0.0	0.0	0.0	0.0	0.0	0.0	0.0	0.0	0.0	0.0	2.0	0.0	0.0	0.0	0.0	0.0	0.0	1.0	4.0	187.0	580.0	107.0	185.0
OTU274099275	Bacteria; Acidobacteria; Solibacteres; Solibacterales; Solibacteraceae (Subgroup 3); PAUC26f	0.0	0.0	0.0	0.0	0.0	0.0	0.0	0.0	0.0	0.0	0.0	0.0	0.0	0.0	0.0	0.0	0.0	0.0	0.0	0.0	0.0	0.0	2.0	3.0	66.0	26.0	139.0	106.0
OTU18427079	Bacteria; Proteobacteria; Alphaproteobacteria; Caulobacterales; Hyphomonadaceae; uncultured; uncultured bacterium	0.0	0.0	0.0	0.0	0.0	0.0	0.0	3.0	0.0	819.0	741.0	0.0	0.0	0.0	0.0	0.0	0.0	0.0	0.0	0.0	0.0	0.0	0.0	0.0	2.0	3.0	0.0	0.0
OTU595664638	Bacteria; Planctomycetes; Pla3 lineage; uncultured bacterium; uncultured bacterium; uncultured bacterium; uncultured bacterium	0.0	0.0	0.0	0.0	0.0	0.0	0.0	0.0	0.0	0.0	0.0	0.0	0.0	0.0	0.0	0.0	0.0	0.0	0.0	0.0	0.0	0.0	1.0	0.0	159.0	319.0	40.0	20.0
OTU348214534	Bacteria; Chloroflexi; Ardenticatenia; uncultured; uncultured bacterium; uncultured bacterium; uncultured bacterium	0.0	0.0	0.0	0.0	0.0	0.0	0.0	0.0	0.0	0.0	0.0	0.0	0.0	0.0	0.0	1.0	0.0	0.0	0.0	0.0	0.0	0.0	0.0	0.0	164.0	35.0	16.0	85.0
OTU714824567	Bacteria; Planctomycetes; Phycisphaerae; Phycisphaerales; Phycisphaeraceae; uncultured; uncultured bacterium	0.0	0.0	0.0	0.0	0.0	0.0	0.0	0.0	0.0	0.0	0.0	0.0	0.0	0.0	0.0	1.0	0.0	0.0	0.0	0.0	0.0	0.0	8.0	9.0	1.0	2.0	475.0	26.0
OTU456622288	Archaea; Euryarchaeota; Thermoplasmata; Thermoplasmatales; Marine Benthic Group D and DHVEG-1; uncultured archaeon; uncultured archaeon	0.0	0.0	0.0	0.0	0.0	0.0	0.0	0.0	0.0	0.0	0.0	0.0	0.0	0.0	0.0	0.0	0.0	17.0	25.0	36.0	117.0	168.0	40.0	40.0	0.0	0.0	0.0	0.0
OTU994584122	Bacteria; Proteobacteria; Betaproteobacteria; TRA3-20; uncultured bacterium; uncultured bacterium; uncultured bacterium	0.0	0.0	0.0	0.0	0.0	0.0	0.0	0.0	0.0	0.0	0.0	0.0	0.0	0.0	0.0	0.0	0.0	0.0	0.0	0.0	0.0	0.0	0.0	1.0	82.0	8.0	41.0	34.0
OTU773558936	Bacteria; Proteobacteria; Alphaproteobacteria; Rhodospirillales; Rhodospirillaceae; uncultured; uncultured bacterium	0.0	2.0	0.0	0.0	0.0	0.0	0.0	0.0	0.0	1.0	0.0	0.0	0.0	0.0	0.0	0.0	0.0	0.0	0.0	0.0	0.0	0.0	0.0	6.0	200.0	193.0	305.0	387.0
OTU507024676	Bacteria; Proteobacteria; Gammaproteobacteria; Xanthomonadales; Xanthomonadaceae; Stenotrophomonas	0.0	0.0	0.0	0.0	0.0	0.0	0.0	0.0	0.0	0.0	0.0	0.0	0.0	0.0	97.0	220.0	247.0	0.0	0.0	0.0	0.0	0.0	0.0	0.0	0.0	0.0	0.0	0.0
OTU564910873	Bacteria; Chlorobi; Chlorobia; Chlorobiales; OPB56	0.0	0.0	0.0	0.0	4.0	18.0	7.0	71.0	52.0	8.0	21.0	0.0	0.0	0.0	0.0	0.0	0.0	0.0	0.0	0.0	0.0	0.0	0.0	0.0	0.0	0.0	0.0	0.0
OTU843527687	Bacteria; Proteobacteria; Deltaproteobacteria; NB1-j	0.0	0.0	0.0	0.0	0.0	0.0	0.0	0.0	0.0	0.0	0.0	0.0	0.0	0.0	0.0	0.0	0.0	0.0	0.0	0.0	0.0	0.0	1.0	0.0	99.0	89.0	60.0	219.0
OTU512329046	Bacteria; Planctomycetes; Phycisphaerae; Phycisphaerales; AKAU3564 sediment group	0.0	2.0	3.0	1.0	0.0	0.0	0.0	0.0	0.0	0.0	0.0	0.0	0.0	0.0	0.0	0.0	0.0	118.0	113.0	135.0	761.0	786.0	713.0	465.0	0.0	0.0	0.0	0.0
OTU740246906	Unassigned	0.0	0.0	0.0	0.0	0.0	1.0	0.0	1.0	2.0	40.0	106.0	0.0	0.0	0.0	0.0	0.0	0.0	0.0	0.0	0.0	0.0	0.0	0.0	0.0	0.0	0.0	0.0	0.0
OTU253770294	Bacteria; Proteobacteria; Alphaproteobacteria; Rhizobiales; Xanthobacteraceae; Ambiguous_taxa; Ambiguous_taxa	1.0	0.0	2.0	0.0	0.0	0.0	0.0	0.0	0.0	0.0	0.0	0.0	0.0	0.0	0.0	0.0	0.0	0.0	0.0	0.0	0.0	0.0	0.0	0.0	76.0	67.0	17.0	35.0
OTU258632099	Bacteria; Fibrobacteres; Chitinivibrionia; possible order 07; uncultured bacterium; uncultured bacterium; uncultured bacterium	0.0	0.0	1.0	0.0	0.0	0.0	0.0	0.0	0.0	0.0	0.0	0.0	0.0	0.0	0.0	0.0	0.0	6.0	2.0	11.0	49.0	69.0	19.0	16.0	0.0	0.0	0.0	0.0
OTU931308174	Bacteria; AC1; Ambiguous_taxa; Ambiguous_taxa; Ambiguous_taxa; Ambiguous_taxa; Ambiguous_taxa	0.0	0.0	1.0	1.0	0.0	0.0	0.0	0.0	0.0	0.0	0.0	0.0	0.0	0.0	0.0	0.0	0.0	17.0	14.0	7.0	50.0	12.0	16.0	9.0	0.0	0.0	0.0	0.0
OTU444568740	Unassigned	0.0	0.0	0.0	0.0	0.0	6.0	46.0	59.0	110.0	0.0	0.0	0.0	0.0	0.0	0.0	0.0	0.0	0.0	0.0	0.0	0.0	0.0	0.0	0.0	0.0	0.0	0.0	0.0
OTU700988386	Bacteria; Proteobacteria; Deltaproteobacteria; Desulfovibrionales; Desulfovibrionaceae; Desulfovibrio; Ambiguous_taxa	0.0	0.0	0.0	0.0	8.0	12.0	23.0	60.0	69.0	21.0	32.0	0.0	0.0	0.0	0.0	0.0	0.0	0.0	0.0	0.0	0.0	0.0	0.0	0.0	0.0	0.0	0.0	0.0
OTU770192494	Bacteria; Bacteroidetes; Flavobacteriia; Flavobacteriales; Cryomorphaceae; Fluviicola; uncultured bacterium	1.0	1.0	0.0	0.0	0.0	0.0	0.0	0.0	0.0	1.0	5.0	177.0	15.0	1.0	0.0	0.0	0.0	0.0	1.0	0.0	1.0	0.0	0.0	0.0	0.0	0.0	0.0	0.0
OTU247652425	Bacteria; Planctomycetes; Planctomycetacia; Planctomycetales; Planctomycetaceae; uncultured; uncultured bacterium	0.0	0.0	0.0	1.0	0.0	0.0	0.0	0.0	0.0	0.0	0.0	0.0	0.0	0.0	0.0	0.0	0.0	0.0	0.0	0.0	0.0	0.0	4.0	0.0	42.0	34.0	36.0	57.0
OTU990236795	Bacteria; Planctomycetes; OM190	0.0	0.0	0.0	0.0	0.0	0.0	0.0	0.0	0.0	0.0	0.0	0.0	0.0	0.0	0.0	0.0	0.0	0.0	0.0	0.0	0.0	0.0	10.0	4.0	63.0	4.0	228.0	292.0
OTU254831880	Bacteria; Planctomycetes; Phycisphaerae; Phycisphaerales; Phycisphaeraceae; AKYG587; uncultured bacterium	0.0	0.0	0.0	0.0	0.0	1.0	0.0	0.0	0.0	0.0	0.0	0.0	0.0	0.0	0.0	0.0	1.0	0.0	0.0	0.0	0.0	0.0	0.0	2.0	301.0	148.0	68.0	76.0
OTU929968066	Bacteria; Spirochaetae; Spirochaetes; Spirochaetales; Spirochaetales Incertae Sedis; Exilispira; uncultured bacterium	0.0	0.0	0.0	0.0	0.0	0.0	0.0	0.0	0.0	0.0	0.0	0.0	0.0	0.0	0.0	0.0	0.0	22.0	24.0	8.0	41.0	52.0	7.0	7.0	0.0	0.0	0.0	0.0
OTU462570420	Bacteria; Firmicutes; Clostridia; Clostridiales; Family XII; Acidaminobacter; uncultured bacterium	1.0	2.0	1.0	2.0	130.0	208.0	0.0	33.0	2.0	1.0	1.0	5.0	299.0	1.0	0.0	0.0	0.0	0.0	0.0	0.0	0.0	0.0	26.0	6.0	0.0	0.0	0.0	0.0
OTU467304502	Bacteria; Bacteroidetes; Flavobacteriia; Flavobacteriales; Flavobacteriaceae; uncultured; Ambiguous_taxa	1.0	44.0	17.0	8.0	13.0	18.0	17.0	119.0	77.0	16.0	16.0	11.0	14.0	1.0	0.0	6.0	0.0	4.0	0.0	0.0	0.0	0.0	0.0	0.0	0.0	0.0	0.0	0.0
OTU74600949	Bacteria; Planctomycetes; Planctomycetacia; Planctomycetales; Planctomycetaceae; uncultured; uncultured bacterium	0.0	0.0	0.0	0.0	0.0	0.0	0.0	0.0	0.0	0.0	0.0	0.0	0.0	0.0	0.0	1.0	0.0	0.0	0.0	0.0	0.0	0.0	1.0	0.0	43.0	40.0	49.0	42.0
OTU805057352	Bacteria; Proteobacteria; Alphaproteobacteria; Rhodospirillales; KCM-B-15	0.0	0.0	0.0	0.0	0.0	0.0	0.0	0.0	0.0	0.0	0.0	0.0	0.0	0.0	0.0	0.0	0.0	0.0	0.0	0.0	0.0	0.0	1.0	0.0	93.0	363.0	10.0	1.0
OTU365270388	Archaea; Bathyarchaeota; uncultured archaeon; uncultured archaeon; uncultured archaeon; uncultured archaeon; uncultured archaeon	0.0	0.0	0.0	0.0	0.0	0.0	0.0	0.0	0.0	0.0	0.0	0.0	0.0	0.0	0.0	0.0	0.0	4.0	8.0	9.0	25.0	74.0	8.0	11.0	0.0	0.0	0.0	0.0
OTU921980302	Bacteria; Proteobacteria; Gammaproteobacteria; Xanthomonadales; Xanthomonadaceae; uncultured	0.0	0.0	0.0	0.0	82.0	231.0	127.0	49.0	108.0	148.0	130.0	0.0	0.0	0.0	0.0	0.0	0.0	0.0	0.0	0.0	0.0	0.0	0.0	0.0	0.0	0.0	0.0	0.0
OTU266793972	Unassigned	0.0	0.0	0.0	0.0	0.0	0.0	0.0	193.0	0.0	1.0	1.0	0.0	0.0	0.0	0.0	0.0	0.0	0.0	0.0	0.0	0.0	0.0	0.0	0.0	0.0	0.0	0.0	0.0
OTU342257442	Bacteria; Fibrobacteres; Chitinivibrionia; uncultured; uncultured bacterium; uncultured bacterium; uncultured bacterium	0.0	0.0	0.0	0.0	0.0	1.0	5.0	79.0	79.0	1.0	3.0	0.0	0.0	0.0	0.0	0.0	0.0	0.0	0.0	0.0	0.0	0.0	0.0	0.0	0.0	0.0	0.0	0.0
OTU916096944	Bacteria; Aminicenantes; uncultured bacterium; uncultured bacterium; uncultured bacterium; uncultured bacterium; uncultured bacterium	0.0	2.0	4.0	2.0	0.0	0.0	0.0	0.0	0.0	0.0	0.0	0.0	0.0	0.0	0.0	0.0	0.0	11.0	16.0	13.0	90.0	168.0	73.0	34.0	0.0	0.0	0.0	0.0
OTU692460352	Bacteria; Proteobacteria; Alphaproteobacteria; Rhodospirillales; DA111; uncultured bacterium; uncultured bacterium	0.0	0.0	0.0	0.0	0.0	0.0	0.0	0.0	0.0	0.0	0.0	0.0	0.0	0.0	0.0	0.0	0.0	0.0	0.0	0.0	0.0	0.0	0.0	0.0	138.0	72.0	0.0	17.0
OTU880541007	Bacteria; Planctomycetes; Planctomycetacia; Planctomycetales; Planctomycetaceae; uncultured	0.0	1.0	0.0	2.0	0.0	0.0	0.0	0.0	0.0	5.0	10.0	0.0	0.0	1.0	0.0	5.0	0.0	0.0	1.0	0.0	0.0	0.0	0.0	0.0	96.0	101.0	28.0	46.0
OTU427749795	Bacteria; Chloroflexi; SAR202 clade; Ambiguous_taxa; Ambiguous_taxa; Ambiguous_taxa; Ambiguous_taxa	0.0	0.0	0.0	0.0	0.0	0.0	0.0	0.0	0.0	0.0	0.0	0.0	0.0	0.0	0.0	0.0	0.0	0.0	0.0	0.0	0.0	0.0	0.0	0.0	118.0	71.0	2.0	10.0
OTU307520381	Bacteria; Proteobacteria; Epsilonproteobacteria; Campylobacterales; Campylobacteraceae; Sulfurospirillum; uncultured bacterium	26.0	20.0	13.0	22.0	3.0	0.0	0.0	0.0	1.0	0.0	0.0	2.0	4.0	19.0	0.0	0.0	0.0	1.0	3.0	0.0	0.0	0.0	0.0	0.0	0.0	0.0	0.0	0.0
OTU45361343	Bacteria; RBG-1 (Zixibacteria); uncultured bacterium; uncultured bacterium; uncultured bacterium; uncultured bacterium; uncultured bacterium	0.0	0.0	0.0	0.0	0.0	0.0	0.0	0.0	0.0	0.0	0.0	0.0	0.0	0.0	0.0	0.0	0.0	0.0	0.0	0.0	0.0	0.0	0.0	0.0	79.0	0.0	23.0	34.0
OTU167135326	Bacteria; Bacteroidetes; Sphingobacteriia; Sphingobacteriales; Sphingobacteriaceae; Sphingobacterium	0.0	1.0	0.0	3.0	0.0	0.0	0.0	0.0	0.0	0.0	0.0	0.0	0.0	0.0	305.0	229.0	681.0	0.0	0.0	0.0	0.0	0.0	0.0	0.0	0.0	0.0	0.0	0.0
OTU328165007	Bacteria; Verrucomicrobia; OPB35 soil group; uncultured bacterium; uncultured bacterium; uncultured bacterium; uncultured bacterium	0.0	0.0	0.0	0.0	0.0	0.0	0.0	0.0	0.0	0.0	0.0	0.0	0.0	0.0	0.0	0.0	0.0	0.0	0.0	0.0	0.0	0.0	2.0	0.0	35.0	2.0	16.0	73.0
OTU804232054	Bacteria; Cloacimonetes; MSBL8; uncultured bacterium; uncultured bacterium; uncultured bacterium; uncultured bacterium	0.0	0.0	0.0	0.0	0.0	2.0	37.0	893.0	621.0	1.0	0.0	0.0	0.0	0.0	0.0	0.0	0.0	0.0	0.0	0.0	0.0	0.0	0.0	0.0	0.0	0.0	0.0	0.0
OTU493375786	Bacteria; Deferribacteres; Deferribacteres Incertae Sedis; Unknown Order; Unknown Family; Caldithrix	0.0	0.0	0.0	0.0	0.0	0.0	0.0	0.0	0.0	0.0	0.0	0.0	0.0	0.0	0.0	0.0	0.0	11.0	17.0	10.0	56.0	66.0	12.0	12.0	0.0	0.0	0.0	0.0
OTU111851596	Bacteria; Proteobacteria; Alphaproteobacteria; Rhodospirillales; MNC12	0.0	0.0	0.0	0.0	0.0	0.0	0.0	0.0	0.0	0.0	0.0	0.0	0.0	0.0	0.0	0.0	0.0	0.0	0.0	0.0	0.0	0.0	1.0	2.0	2.0	0.0	46.0	165.0
OTU464282471	Bacteria; Bacteroidetes; Sphingobacteriia; Sphingobacteriales; Lentimicrobiaceae; Ambiguous_taxa; Ambiguous_taxa	0.0	0.0	0.0	0.0	3.0	11.0	66.0	1229.0	1007.0	56.0	27.0	0.0	0.0	0.0	0.0	0.0	0.0	0.0	0.0	0.0	0.0	0.0	0.0	0.0	0.0	0.0	0.0	0.0
OTU169736029	Bacteria; Bacteroidetes; Flavobacteriia; Flavobacteriales; NS9 marine group; uncultured bacterium; uncultured bacterium	0.0	0.0	0.0	0.0	0.0	0.0	0.0	0.0	0.0	0.0	0.0	0.0	0.0	0.0	0.0	0.0	0.0	0.0	0.0	0.0	0.0	0.0	0.0	0.0	18.0	143.0	1.0	0.0
OTU627891980	Bacteria; Chloroflexi; Anaerolineae; Anaerolineales; Anaerolineaceae; uncultured	0.0	0.0	0.0	0.0	15.0	21.0	63.0	196.0	239.0	11.0	48.0	0.0	0.0	0.0	0.0	0.0	0.0	0.0	0.0	0.0	0.0	0.0	0.0	0.0	0.0	0.0	0.0	0.0
OTU968406053	Bacteria; Nitrospirae; Nitrospira; Nitrospirales; 0319-6A21; uncultured bacterium; uncultured bacterium	0.0	1.0	0.0	0.0	0.0	0.0	0.0	0.0	0.0	0.0	0.0	0.0	0.0	1.0	0.0	8.0	0.0	0.0	0.0	0.0	0.0	0.0	0.0	0.0	27.0	128.0	3.0	11.0
OTU568769978	Bacteria; Proteobacteria; Deltaproteobacteria; Myxococcales; Sandaracinaceae; Sandaracinus; uncultured bacterium	3.0	0.0	0.0	0.0	51.0	81.0	5.0	1.0	5.0	0.0	1.0	0.0	0.0	5.0	0.0	0.0	0.0	0.0	0.0	0.0	83.0	0.0	0.0	0.0	1.0	0.0	0.0	0.0
OTU17568740	Bacteria; Omnitrophica; Omnitrophica Incertae Sedis; Unknown Order; Unknown Family; Candidatus Omnitrophus	4.0	10.0	1.0	2.0	0.0	0.0	6.0	6.0	0.0	131.0	162.0	0.0	0.0	0.0	0.0	0.0	0.0	0.0	1.0	0.0	2.0	0.0	0.0	1.0	0.0	0.0	0.0	0.0
OTU907968595	Bacteria; Bacteroidetes; Sphingobacteriia; Sphingobacteriales; CMW-169; uncultured bacterium; uncultured bacterium	0.0	0.0	0.0	0.0	0.0	0.0	33.0	176.0	137.0	1.0	6.0	0.0	0.0	0.0	0.0	0.0	0.0	0.0	0.0	0.0	0.0	0.0	0.0	0.0	0.0	0.0	0.0	0.0
OTU249577088	Unassigned	0.0	0.0	0.0	0.0	10.0	28.0	75.0	386.0	387.0	6.0	6.0	0.0	0.0	0.0	0.0	0.0	0.0	0.0	0.0	0.0	0.0	0.0	0.0	0.0	19.0	0.0	0.0	2.0
OTU984477776	Bacteria; Peregrinibacteria	0.0	0.0	0.0	0.0	0.0	0.0	5.0	58.0	125.0	14.0	1.0	0.0	0.0	0.0	0.0	0.0	0.0	0.0	0.0	0.0	0.0	0.0	0.0	0.0	0.0	0.0	0.0	0.0
OTU845806069	Bacteria; Proteobacteria; Alphaproteobacteria; Parvularculales; Parvularculaceae; Amphiplicatus	0.0	0.0	0.0	1.0	0.0	1.0	0.0	6.0	1.0	2.0	17.0	0.0	0.0	0.0	0.0	1.0	0.0	0.0	0.0	0.0	0.0	0.0	2.0	0.0	37.0	19.0	71.0	17.0
OTU408360023	Bacteria; Verrucomicrobia; OPB35 soil group	0.0	0.0	0.0	0.0	0.0	1.0	9.0	96.0	76.0	7.0	7.0	0.0	0.0	0.0	0.0	0.0	0.0	0.0	0.0	0.0	0.0	0.0	0.0	0.0	0.0	0.0	0.0	0.0
OTU387934458	Bacteria; Spirochaetae; Spirochaetes; Spirochaetales; Leptospiraceae; uncultured; uncultured bacterium	0.0	0.0	0.0	0.0	2.0	4.0	28.0	149.0	199.0	21.0	18.0	0.0	0.0	0.0	0.0	1.0	0.0	0.0	0.0	0.0	0.0	0.0	0.0	0.0	0.0	0.0	0.0	0.0
OTU215712989	Bacteria; Bacteroidetes; Flavobacteriia; Flavobacteriales; Flavobacteriaceae; Flavobacterium	63.0	11.0	8.0	4.0	102.0	94.0	6.0	2.0	5.0	5.0	4.0	3936.0	2865.0	32.0	0.0	4.0	0.0	3.0	8.0	18.0	25.0	13.0	2.0	1.0	0.0	0.0	0.0	0.0
OTU493483312	Bacteria; Planctomycetes; Phycisphaerae; Phycisphaerales; Phycisphaeraceae; SM1A02; uncultured bacterium	0.0	0.0	0.0	0.0	0.0	0.0	0.0	0.0	0.0	0.0	0.0	0.0	0.0	0.0	0.0	0.0	0.0	0.0	0.0	0.0	0.0	0.0	0.0	1.0	130.0	25.0	54.0	43.0
OTU620742720	Bacteria; Proteobacteria; Alphaproteobacteria; Rhodospirillales; Rhodospirillaceae; uncultured	0.0	2.0	0.0	0.0	1.0	12.0	14.0	138.0	86.0	20.0	24.0	0.0	0.0	0.0	0.0	0.0	0.0	0.0	0.0	0.0	0.0	0.0	0.0	1.0	0.0	0.0	0.0	0.0
OTU88824255	Bacteria; Planctomycetes; Phycisphaerae; Phycisphaerales; Phycisphaeraceae; uncultured; uncultured bacterium	0.0	0.0	0.0	0.0	0.0	0.0	0.0	0.0	0.0	52.0	398.0	0.0	0.0	0.0	0.0	0.0	0.0	0.0	0.0	0.0	0.0	0.0	0.0	0.0	0.0	0.0	0.0	0.0
OTU754920670	Bacteria; Acidobacteria; Blastocatellia; Blastocatellales; Blastocatellaceae (Subgroup 4); 11-24	0.0	0.0	0.0	0.0	0.0	0.0	0.0	0.0	0.0	0.0	0.0	0.0	0.0	0.0	0.0	4.0	0.0	0.0	0.0	0.0	0.0	0.0	9.0	5.0	175.0	608.0	404.0	2090.0
OTU348165712	Bacteria; Proteobacteria; Gammaproteobacteria	0.0	0.0	0.0	0.0	94.0	50.0	0.0	0.0	16.0	0.0	0.0	0.0	0.0	0.0	0.0	0.0	0.0	0.0	0.0	0.0	0.0	0.0	0.0	0.0	0.0	0.0	0.0	0.0
OTU587587167	Bacteria; Proteobacteria; Deltaproteobacteria; Oligoflexales; 0319-6G20	0.0	0.0	0.0	0.0	0.0	0.0	0.0	0.0	0.0	0.0	0.0	0.0	0.0	0.0	0.0	0.0	0.0	0.0	0.0	0.0	0.0	0.0	0.0	0.0	375.0	399.0	6.0	5.0
OTU717492073	Bacteria; Proteobacteria; Gammaproteobacteria; uncultured	0.0	0.0	0.0	0.0	70.0	65.0	0.0	0.0	0.0	2.0	11.0	0.0	0.0	0.0	0.0	0.0	0.0	0.0	0.0	0.0	0.0	0.0	0.0	0.0	0.0	0.0	0.0	0.0
OTU807533048	Bacteria; Planctomycetes; Phycisphaerae; Phycisphaerales; Phycisphaeraceae; SM1A02	0.0	0.0	0.0	0.0	0.0	0.0	0.0	0.0	0.0	0.0	0.0	0.0	0.0	0.0	0.0	0.0	0.0	0.0	0.0	0.0	0.0	0.0	3.0	1.0	5.0	4.0	102.0	122.0
OTU929172616	Bacteria; Proteobacteria; Alphaproteobacteria; Rhizobiales; A0839; uncultured bacterium; uncultured bacterium	0.0	0.0	0.0	0.0	0.0	0.0	0.0	0.0	0.0	176.0	296.0	0.0	0.0	0.0	0.0	0.0	0.0	0.0	0.0	0.0	0.0	0.0	0.0	0.0	0.0	0.0	0.0	0.0
OTU725764692	Bacteria; Acidobacteria; Solibacteres; Solibacterales; Solibacteraceae (Subgroup 3); Bryobacter; uncultured bacterium	0.0	0.0	0.0	0.0	0.0	0.0	0.0	0.0	0.0	0.0	0.0	0.0	0.0	0.0	0.0	0.0	0.0	0.0	0.0	0.0	0.0	0.0	0.0	0.0	52.0	2.0	5.0	88.0
OTU692816540	Bacteria; Proteobacteria; Deltaproteobacteria; Desulfovibrionales; Desulfomicrobiaceae; Desulfomicrobium; uncultured bacterium	0.0	0.0	0.0	0.0	0.0	2.0	42.0	564.0	312.0	3.0	6.0	0.0	0.0	0.0	0.0	0.0	0.0	0.0	0.0	0.0	0.0	0.0	0.0	0.0	0.0	0.0	0.0	0.0
OTU629601532	Bacteria; Peregrinibacteria; Candidatus Peribacteria; uncultured bacterium; uncultured bacterium; uncultured bacterium; uncultured bacterium	0.0	0.0	0.0	0.0	0.0	0.0	0.0	0.0	0.0	0.0	0.0	0.0	0.0	0.0	0.0	0.0	0.0	0.0	0.0	0.0	0.0	0.0	0.0	0.0	182.0	1226.0	0.0	0.0
OTU68260005	Unassigned	0.0	0.0	0.0	0.0	0.0	0.0	0.0	0.0	0.0	0.0	0.0	0.0	0.0	0.0	0.0	0.0	0.0	9.0	6.0	20.0	33.0	44.0	22.0	9.0	0.0	0.0	0.0	0.0
OTU615827308	Bacteria; Spirochaetae; Spirochaetes; Spirochaetales; Spirochaetaceae; Treponema	0.0	0.0	0.0	0.0	20.0	18.0	269.0	2448.0	367.0	114.0	124.0	0.0	0.0	0.0	0.0	0.0	0.0	0.0	0.0	0.0	0.0	0.0	0.0	0.0	0.0	0.0	0.0	0.0
OTU675631832	Unassigned	0.0	0.0	0.0	0.0	0.0	0.0	0.0	0.0	0.0	0.0	0.0	0.0	0.0	0.0	0.0	0.0	0.0	17.0	15.0	6.0	29.0	37.0	16.0	17.0	0.0	0.0	0.0	0.0
OTU834445910	Bacteria; PAUC34f; uncultured bacterium; uncultured bacterium; uncultured bacterium; uncultured bacterium; uncultured bacterium	0.0	0.0	0.0	0.0	0.0	0.0	0.0	0.0	0.0	0.0	0.0	0.0	0.0	0.0	0.0	0.0	0.0	44.0	29.0	26.0	139.0	162.0	24.0	10.0	0.0	0.0	0.0	0.0
OTU815118301	Bacteria; Proteobacteria; Deltaproteobacteria; Syntrophobacterales; Syntrophaceae; Desulfobacca; uncultured bacterium	0.0	0.0	0.0	0.0	0.0	0.0	0.0	0.0	0.0	0.0	0.0	0.0	0.0	0.0	0.0	0.0	0.0	34.0	25.0	4.0	42.0	228.0	11.0	2.0	0.0	0.0	0.0	0.0
OTU997924300	Unassigned	2.0	3.0	2.0	0.0	0.0	0.0	0.0	0.0	0.0	0.0	0.0	0.0	0.0	0.0	0.0	0.0	1.0	519.0	485.0	351.0	909.0	937.0	1200.0	803.0	0.0	0.0	0.0	0.0
OTU567572393	Bacteria; Proteobacteria; Alphaproteobacteria; Rhodospirillales; I-10; uncultured bacterium; uncultured bacterium	0.0	0.0	0.0	0.0	0.0	0.0	0.0	0.0	0.0	0.0	3.0	0.0	0.0	0.0	0.0	0.0	0.0	0.0	0.0	0.0	0.0	0.0	0.0	0.0	11.0	88.0	27.0	44.0
OTU803025589	Bacteria; Bacteroidetes; Cytophagia; Cytophagales; Cytophagaceae; Chryseolinea	0.0	0.0	0.0	0.0	0.0	0.0	0.0	0.0	0.0	0.0	0.0	0.0	0.0	0.0	0.0	0.0	0.0	0.0	0.0	0.0	0.0	0.0	3.0	2.0	830.0	477.0	169.0	1008.0
OTU7117273	Bacteria; Chloroflexi; Anaerolineae; Anaerolineales; Anaerolineaceae; uncultured; uncultured bacterium	0.0	0.0	0.0	0.0	0.0	0.0	0.0	0.0	0.0	0.0	0.0	0.0	0.0	0.0	0.0	1.0	0.0	0.0	0.0	0.0	0.0	0.0	22.0	12.0	1092.0	753.0	711.0	1638.0
OTU102661487	Bacteria; Proteobacteria; Deltaproteobacteria; Desulfobacterales; Desulfobacteraceae; Sva0081 sediment group	0.0	1.0	0.0	0.0	0.0	2.0	0.0	7.0	3.0	207.0	369.0	0.0	0.0	0.0	0.0	0.0	1.0	5.0	4.0	0.0	0.0	0.0	0.0	3.0	0.0	0.0	0.0	0.0
OTU181160687	Bacteria; Chloroflexi; Anaerolineae; Anaerolineales; Anaerolineaceae; uncultured; uncultured bacterium	0.0	0.0	0.0	0.0	0.0	0.0	0.0	0.0	0.0	0.0	0.0	0.0	0.0	0.0	0.0	0.0	0.0	48.0	60.0	3.0	1.0	4.0	17.0	13.0	0.0	0.0	0.0	0.0
OTU876281763	Unassigned	0.0	0.0	0.0	0.0	0.0	0.0	0.0	0.0	0.0	0.0	0.0	0.0	0.0	0.0	0.0	0.0	0.0	55.0	49.0	21.0	123.0	130.0	27.0	14.0	0.0	0.0	0.0	0.0
OTU372549386	Bacteria; Bacteroidetes; Flavobacteriia; Flavobacteriales; Flavobacteriaceae; Flavobacterium	0.0	0.0	0.0	0.0	35.0	17.0	1.0	2.0	13.0	0.0	1.0	39.0	4.0	1.0	0.0	0.0	0.0	0.0	0.0	4.0	9.0	4.0	3.0	5.0	0.0	0.0	0.0	0.0
OTU115495309	Bacteria; Chloroflexi; Anaerolineae; Anaerolineales; Anaerolineaceae; uncultured	0.0	0.0	0.0	0.0	0.0	0.0	0.0	0.0	0.0	0.0	1.0	0.0	0.0	0.0	0.0	0.0	0.0	0.0	0.0	0.0	0.0	0.0	8.0	5.0	274.0	482.0	312.0	479.0
OTU624916013	Bacteria; Bacteroidetes; Sphingobacteriia; Sphingobacteriales; Saprospiraceae; uncultured; uncultured bacterium	0.0	0.0	0.0	0.0	33.0	25.0	108.0	407.0	729.0	15.0	15.0	0.0	0.0	0.0	0.0	0.0	0.0	0.0	0.0	0.0	0.0	0.0	0.0	0.0	0.0	0.0	0.0	0.0
OTU698914401	Bacteria; Cloacimonetes; LNR A2-18; uncultured bacterium; uncultured bacterium; uncultured bacterium; uncultured bacterium	0.0	0.0	0.0	0.0	1.0	1.0	9.0	78.0	38.0	0.0	0.0	0.0	0.0	0.0	0.0	0.0	0.0	0.0	0.0	0.0	0.0	0.0	0.0	0.0	0.0	0.0	0.0	0.0
OTU887815310	Bacteria; Parcubacteria; uncultured bacterium; uncultured bacterium; uncultured bacterium; uncultured bacterium; uncultured bacterium	0.0	0.0	0.0	0.0	0.0	0.0	0.0	0.0	0.0	0.0	0.0	0.0	0.0	0.0	0.0	0.0	0.0	0.0	0.0	0.0	0.0	0.0	0.0	0.0	16.0	703.0	0.0	18.0
OTU519417431	Bacteria; Spirochaetae; Spirochaetes; Spirochaetales; V2072-189E03	0.0	0.0	1.0	1.0	16.0	17.0	36.0	15.0	374.0	15.0	42.0	0.0	0.0	0.0	0.0	0.0	0.0	0.0	0.0	0.0	0.0	0.0	0.0	0.0	0.0	0.0	0.0	0.0
OTU910889452	Bacteria; Planctomycetes; Phycisphaerae; Phycisphaerales; AKAU3564 sediment group; uncultured planctomycete; uncultured planctomycete	0.0	0.0	1.0	0.0	0.0	0.0	0.0	0.0	0.0	0.0	0.0	0.0	0.0	0.0	0.0	1.0	0.0	15.0	21.0	9.0	70.0	85.0	53.0	51.0	0.0	0.0	0.0	0.0
OTU628943507	Bacteria; Chloroflexi; TK10	0.0	2.0	0.0	0.0	0.0	0.0	0.0	0.0	0.0	0.0	0.0	0.0	0.0	0.0	0.0	0.0	0.0	0.0	0.0	0.0	0.0	0.0	0.0	0.0	55.0	173.0	12.0	12.0
OTU563635048	Bacteria; SR1 (Absconditabacteria); uncultured candidate division SR1 bacterium; uncultured candidate division SR1 bacterium; uncultured candidate division SR1 bacterium; uncultured candidate division SR1 bacterium; uncultured candidate division SR1 bacterium	1.0	2.0	0.0	0.0	5.0	5.0	58.0	408.0	350.0	9.0	39.0	0.0	0.0	0.0	0.0	0.0	0.0	0.0	0.0	0.0	0.0	0.0	0.0	0.0	0.0	0.0	0.0	0.0
OTU718239442	Bacteria; Proteobacteria; Betaproteobacteria; Neisseriales; Neisseriaceae; Vogesella; uncultured bacterium	0.0	0.0	0.0	0.0	0.0	0.0	0.0	0.0	0.0	24.0	25.0	0.0	0.0	2.0	4.0	1.0	1.0	47.0	73.0	0.0	0.0	0.0	11.0	3.0	0.0	0.0	0.0	1.0
OTU845439269	Bacteria; Chloroflexi; Anaerolineae; Anaerolineales; Anaerolineaceae; uncultured; uncultured bacterium	0.0	0.0	0.0	0.0	0.0	0.0	0.0	0.0	0.0	0.0	0.0	0.0	0.0	0.0	0.0	1.0	0.0	0.0	0.0	0.0	0.0	0.0	4.0	3.0	147.0	0.0	202.0	8.0
OTU379173380	Bacteria; Bacteroidetes; Sphingobacteriia; Sphingobacteriales; Saprospiraceae; uncultured; uncultured bacterium	0.0	0.0	0.0	0.0	0.0	0.0	0.0	0.0	0.0	0.0	0.0	0.0	0.0	0.0	0.0	0.0	0.0	0.0	0.0	0.0	0.0	0.0	0.0	0.0	796.0	370.0	101.0	257.0
OTU265484762	Bacteria; Proteobacteria; Betaproteobacteria; Hydrogenophilales; Hydrogenophilaceae; uncultured; uncultured bacterium	0.0	2.0	3.0	0.0	0.0	0.0	0.0	0.0	0.0	58.0	63.0	0.0	0.0	0.0	0.0	0.0	0.0	0.0	0.0	0.0	0.0	0.0	0.0	0.0	0.0	0.0	0.0	0.0
OTU800355152	Bacteria; Bacteroidetes; Sphingobacteriia; Sphingobacteriales; env.OPS 17	0.0	0.0	0.0	0.0	653.0	713.0	24.0	95.0	92.0	3.0	5.0	0.0	0.0	0.0	0.0	0.0	0.0	0.0	0.0	0.0	0.0	0.0	0.0	0.0	0.0	0.0	0.0	0.0
OTU703521734	Bacteria; SBR1093; uncultured bacterium; uncultured bacterium; uncultured bacterium; uncultured bacterium; uncultured bacterium	0.0	0.0	0.0	1.0	0.0	0.0	0.0	0.0	0.0	0.0	0.0	0.0	0.0	0.0	0.0	2.0	0.0	0.0	0.0	0.0	0.0	0.0	5.0	3.0	4.0	15.0	153.0	108.0
OTU163664101	Bacteria; Spirochaetae; Spirochaetes; Spirochaetales; Spirochaetaceae; uncultured; uncultured bacterium	0.0	0.0	0.0	0.0	18.0	9.0	1.0	97.0	3.0	1.0	2.0	0.0	0.0	0.0	0.0	0.0	0.0	0.0	0.0	0.0	0.0	1.0	0.0	0.0	0.0	0.0	0.0	0.0
OTU731344875	Bacteria; Ignavibacteriae; Ignavibacteria; Ignavibacteriales; BSV26; Ambiguous_taxa; Ambiguous_taxa	0.0	0.0	0.0	0.0	4.0	15.0	61.0	585.0	425.0	44.0	36.0	0.0	0.0	0.0	0.0	0.0	0.0	0.0	0.0	0.0	0.0	0.0	0.0	0.0	0.0	0.0	0.0	0.0
OTU893359154	Bacteria; Chloroflexi; Anaerolineae; Anaerolineales; Anaerolineaceae; Longilinea	0.0	0.0	0.0	0.0	0.0	0.0	1.0	11.0	1.0	24.0	83.0	0.0	0.0	0.0	0.0	0.0	0.0	0.0	0.0	0.0	0.0	0.0	0.0	0.0	0.0	0.0	0.0	0.0
OTU564290043	Bacteria; Proteobacteria; Betaproteobacteria; Hydrogenophilales; Hydrogenophilaceae; Thiobacillus	0.0	0.0	0.0	0.0	15.0	2.0	0.0	7.0	1.0	51.0	366.0	0.0	0.0	0.0	0.0	0.0	0.0	0.0	0.0	0.0	0.0	0.0	0.0	0.0	0.0	0.0	0.0	0.0
OTU230286095	Bacteria; Bacteroidetes; Bacteroidetes BD2-2; uncultured bacterium; uncultured bacterium; uncultured bacterium; uncultured bacterium	0.0	3.0	0.0	0.0	34.0	32.0	63.0	6.0	167.0	81.0	141.0	0.0	0.0	0.0	0.0	0.0	0.0	0.0	0.0	0.0	0.0	0.0	0.0	0.0	0.0	0.0	0.0	0.0
OTU270132205	Bacteria; Proteobacteria; Deltaproteobacteria; NB1-j	0.0	0.0	0.0	0.0	0.0	0.0	0.0	0.0	0.0	0.0	0.0	0.0	0.0	0.0	0.0	0.0	0.0	0.0	0.0	0.0	0.0	0.0	2.0	2.0	118.0	66.0	20.0	24.0
OTU688386567	Bacteria; Latescibacteria; uncultured bacterium; uncultured bacterium; uncultured bacterium; uncultured bacterium; uncultured bacterium	0.0	1.0	1.0	1.0	0.0	0.0	0.0	0.0	0.0	1.0	2.0	0.0	0.0	0.0	0.0	0.0	0.0	37.0	35.0	10.0	35.0	59.0	15.0	19.0	0.0	0.0	0.0	0.0
OTU620579428	Bacteria; Proteobacteria; Betaproteobacteria; Burkholderiales; Comamonadaceae; Hydrogenophaga; uncultured bacterium	36.0	10.0	13.0	11.0	893.0	1004.0	2.0	11.0	17.0	20.0	25.0	282.0	128.0	129.0	2.0	9.0	0.0	4.0	8.0	8.0	92.0	2.0	16.0	14.0	0.0	0.0	0.0	0.0
OTU324779631	Bacteria; Proteobacteria; Alphaproteobacteria; Rhodospirillales; I-10; uncultured bacterium; uncultured bacterium	0.0	0.0	0.0	0.0	0.0	0.0	0.0	0.0	0.0	0.0	0.0	0.0	0.0	0.0	0.0	0.0	0.0	0.0	0.0	0.0	0.0	0.0	0.0	1.0	31.0	64.0	55.0	43.0
OTU917486016	Bacteria; Proteobacteria; Betaproteobacteria; Burkholderiales; Comamonadaceae	0.0	0.0	0.0	0.0	1.0	0.0	3.0	4.0	7.0	38.0	321.0	0.0	0.0	0.0	0.0	0.0	0.0	0.0	0.0	0.0	0.0	0.0	0.0	0.0	14.0	9.0	2.0	21.0
OTU491413221	Bacteria; Bacteroidetes; Bacteroidetes vadinHA17; Ambiguous_taxa; Ambiguous_taxa; Ambiguous_taxa; Ambiguous_taxa	0.0	0.0	0.0	0.0	45.0	41.0	180.0	2665.0	1578.0	108.0	235.0	0.0	0.0	0.0	0.0	0.0	0.0	0.0	0.0	0.0	0.0	0.0	0.0	0.0	0.0	0.0	0.0	0.0
OTU680564772	Bacteria; Planctomycetes; Phycisphaerae; Phycisphaerales; AKAU3564 sediment group; uncultured bacterium; uncultured bacterium	0.0	0.0	0.0	0.0	0.0	0.0	0.0	0.0	0.0	0.0	0.0	0.0	0.0	0.0	0.0	0.0	0.0	5.0	11.0	13.0	44.0	33.0	7.0	3.0	0.0	0.0	0.0	0.0
OTU377677720	Bacteria; Spirochaetae; Spirochaetes; Spirochaetales; PL-11B10; uncultured bacterium; uncultured bacterium	0.0	0.0	0.0	0.0	9.0	18.0	37.0	2.0	87.0	4.0	16.0	0.0	0.0	0.0	0.0	0.0	0.0	0.0	0.0	0.0	0.0	0.0	0.0	0.0	0.0	0.0	0.0	0.0
OTU343495400	Bacteria; Actinobacteria; Actinobacteria; Micromonosporales; Micromonosporaceae	0.0	0.0	0.0	0.0	0.0	0.0	0.0	0.0	0.0	0.0	0.0	0.0	0.0	0.0	0.0	0.0	0.0	0.0	0.0	0.0	0.0	0.0	0.0	0.0	90.0	68.0	7.0	12.0
OTU243216856	Bacteria; Chlamydiae; Chlamydiae; Chlamydiales; cvE6; uncultured bacterium; uncultured bacterium	0.0	0.0	0.0	0.0	0.0	0.0	0.0	0.0	0.0	0.0	0.0	0.0	0.0	0.0	0.0	0.0	0.0	0.0	0.0	0.0	0.0	0.0	0.0	0.0	216.0	0.0	0.0	1.0
OTU268560313	Unassigned	0.0	1.0	0.0	0.0	1.0	4.0	5.0	5.0	11.0	78.0	43.0	0.0	0.0	0.0	0.0	0.0	0.0	0.0	0.0	0.0	0.0	0.0	0.0	0.0	0.0	0.0	0.0	0.0
OTU748421500	Bacteria; Parcubacteria; Candidatus Magasanikbacteria; uncultured bacterium; uncultured bacterium; uncultured bacterium; uncultured bacterium	1.0	0.0	0.0	0.0	0.0	0.0	4.0	110.0	102.0	0.0	1.0	0.0	0.0	0.0	0.0	0.0	0.0	0.0	0.0	0.0	0.0	0.0	0.0	0.0	0.0	0.0	0.0	0.0
OTU383567843	Bacteria; Chloroflexi; Anaerolineae; Anaerolineales; Anaerolineaceae; uncultured; uncultured bacterium	0.0	0.0	0.0	0.0	0.0	0.0	0.0	0.0	0.0	0.0	0.0	0.0	0.0	0.0	0.0	0.0	0.0	8.0	16.0	70.0	119.0	416.0	112.0	55.0	0.0	0.0	0.0	0.0
OTU496498485	Bacteria; Chloroflexi; Anaerolineae; Anaerolineales; Anaerolineaceae; uncultured; uncultured bacterium	0.0	0.0	0.0	0.0	0.0	0.0	0.0	0.0	0.0	0.0	0.0	0.0	0.0	0.0	0.0	0.0	0.0	23.0	37.0	18.0	54.0	72.0	20.0	22.0	0.0	0.0	0.0	0.0
OTU831183287	Bacteria; Parcubacteria; Candidatus Moranbacteria; uncultured bacterium; uncultured bacterium; uncultured bacterium; uncultured bacterium	2.0	17.0	7.0	2.0	1.0	0.0	82.0	160.0	125.0	9.0	10.0	2.0	0.0	0.0	1.0	9.0	4.0	0.0	0.0	0.0	0.0	0.0	0.0	0.0	0.0	0.0	0.0	0.0
OTU863347173	Bacteria; Proteobacteria; Alphaproteobacteria; Rhodobacterales; Rhodobacteraceae; Rhodobacter	1.0	2.0	1.0	1.0	309.0	400.0	45.0	400.0	418.0	148.0	176.0	1.0	0.0	3.0	0.0	0.0	0.0	0.0	0.0	0.0	5.0	0.0	0.0	0.0	20.0	0.0	4.0	1.0
OTU741142886	Unassigned	0.0	0.0	0.0	0.0	0.0	0.0	0.0	0.0	0.0	0.0	0.0	0.0	0.0	0.0	0.0	0.0	0.0	0.0	0.0	0.0	0.0	0.0	1.0	0.0	3.0	28.0	63.0	39.0
OTU885032655	Bacteria; Bacteroidetes; Flavobacteriia; Flavobacteriales; Cryomorphaceae; uncultured	0.0	0.0	0.0	0.0	0.0	0.0	0.0	0.0	0.0	0.0	0.0	0.0	0.0	0.0	0.0	0.0	0.0	0.0	0.0	0.0	0.0	0.0	0.0	0.0	1.0	14.0	10.0	378.0
OTU167145311	Bacteria; Proteobacteria; Alphaproteobacteria; Rhodospirillales; Rhodospirillaceae; uncultured; uncultured bacterium	0.0	0.0	0.0	0.0	17.0	20.0	13.0	46.0	104.0	41.0	60.0	0.0	0.0	0.0	0.0	0.0	0.0	0.0	0.0	0.0	2.0	0.0	0.0	0.0	14.0	0.0	10.0	8.0
OTU915137582	Bacteria; Bacteroidetes; Flavobacteriia; Flavobacteriales; Cryomorphaceae; uncultured	0.0	0.0	0.0	0.0	0.0	0.0	0.0	0.0	0.0	0.0	0.0	0.0	0.0	0.0	0.0	0.0	0.0	0.0	0.0	0.0	0.0	0.0	0.0	0.0	1432.0	115.0	0.0	0.0
OTU46830408	Bacteria; Proteobacteria; Deltaproteobacteria; Bdellovibrionales; Bacteriovoracaceae	0.0	1.0	0.0	0.0	134.0	118.0	0.0	1.0	0.0	0.0	2.0	0.0	0.0	0.0	0.0	0.0	0.0	0.0	0.0	0.0	0.0	0.0	0.0	0.0	0.0	0.0	0.0	0.0
OTU254452440	Bacteria; Latescibacteria; uncultured bacterium; uncultured bacterium; uncultured bacterium; uncultured bacterium; uncultured bacterium	0.0	0.0	1.0	0.0	0.0	0.0	0.0	0.0	0.0	0.0	0.0	0.0	0.0	0.0	0.0	0.0	0.0	11.0	16.0	23.0	28.0	73.0	14.0	12.0	0.0	0.0	0.0	0.0
OTU820081136	Bacteria; Bacteroidetes; Flavobacteriia; Flavobacteriales; Cryomorphaceae; Fluviicola; uncultured bacterium	4.0	1.0	1.0	0.0	2.0	1.0	0.0	0.0	0.0	0.0	1.0	1010.0	316.0	0.0	0.0	0.0	0.0	1.0	0.0	6.0	0.0	0.0	2.0	2.0	0.0	0.0	0.0	0.0
OTU635939840	Bacteria; Acidobacteria; Subgroup 2; uncultured bacterium; uncultured bacterium; uncultured bacterium; uncultured bacterium	0.0	0.0	0.0	0.0	0.0	0.0	0.0	0.0	0.0	0.0	0.0	0.0	0.0	0.0	0.0	0.0	0.0	0.0	0.0	0.0	0.0	0.0	0.0	1.0	153.0	0.0	16.0	159.0
OTU955090457	Bacteria; Proteobacteria; Alphaproteobacteria; Rickettsiales; SM2D12; uncultured bacterium; uncultured bacterium	11.0	3.0	2.0	0.0	116.0	66.0	40.0	126.0	68.0	26.0	68.0	7.0	1.0	0.0	0.0	0.0	0.0	0.0	0.0	0.0	0.0	0.0	0.0	0.0	0.0	0.0	0.0	0.0
OTU293120388	Bacteria; Firmicutes; Negativicutes; Selenomonadales; Veillonellaceae; uncultured; uncultured bacterium	0.0	0.0	0.0	0.0	13.0	25.0	9.0	236.0	80.0	10.0	12.0	0.0	0.0	0.0	0.0	0.0	0.0	0.0	0.0	0.0	0.0	0.0	0.0	0.0	0.0	0.0	0.0	0.0
OTU521863062	Bacteria; Latescibacteria; uncultured bacterium; uncultured bacterium; uncultured bacterium; uncultured bacterium; uncultured bacterium	0.0	0.0	0.0	0.0	0.0	0.0	0.0	0.0	0.0	0.0	0.0	0.0	0.0	0.0	0.0	0.0	0.0	2.0	0.0	7.0	47.0	54.0	12.0	9.0	0.0	0.0	0.0	0.0
OTU311795571	Bacteria; Proteobacteria; Epsilonproteobacteria; Campylobacterales; Helicobacteraceae; Sulfurovum; uncultured bacterium	190.0	398.0	311.0	238.0	1.0	0.0	0.0	0.0	2.0	1.0	3.0	1.0	0.0	22.0	7.0	15.0	1.0	4.0	7.0	0.0	0.0	1.0	6.0	1.0	0.0	0.0	0.0	0.0
OTU47748403	Bacteria; Planctomycetes; Phycisphaerae; Phycisphaerales; Phycisphaeraceae; SM1A02; uncultured bacterium	0.0	0.0	0.0	0.0	0.0	0.0	0.0	0.0	1.0	11.0	9.0	0.0	0.0	0.0	0.0	0.0	0.0	0.0	0.0	0.0	0.0	0.0	9.0	4.0	164.0	120.0	252.0	123.0
OTU110269764	Bacteria; Proteobacteria; Deltaproteobacteria; Sva0485; uncultured bacterium; uncultured bacterium; uncultured bacterium	0.0	0.0	0.0	0.0	0.0	0.0	0.0	0.0	0.0	0.0	0.0	0.0	0.0	0.0	0.0	0.0	0.0	11.0	14.0	15.0	57.0	67.0	38.0	30.0	0.0	0.0	0.0	0.0
OTU860029900	Bacteria; Bacteroidetes; Flavobacteriia; Flavobacteriales; Flavobacteriaceae; Maritimimonas; Ambiguous_taxa	0.0	1.0	0.0	0.0	7.0	21.0	169.0	437.0	3115.0	221.0	159.0	0.0	0.0	0.0	0.0	0.0	0.0	0.0	0.0	0.0	0.0	0.0	0.0	0.0	0.0	0.0	0.0	0.0
OTU640294418	Bacteria; Chlorobi; Chlorobia; Chlorobiales; OC31; uncultured bacterium; uncultured bacterium	0.0	0.0	0.0	0.0	0.0	0.0	0.0	1.0	0.0	717.0	733.0	0.0	0.0	0.0	0.0	0.0	0.0	3.0	5.0	1.0	4.0	7.0	4.0	0.0	0.0	0.0	0.0	0.0
OTU935128450	Bacteria; Nitrospirae; Nitrospira; Nitrospirales; Nitrospiraceae; Nitrospira; uncultured bacterium	0.0	0.0	0.0	0.0	0.0	0.0	0.0	0.0	0.0	0.0	0.0	0.0	0.0	0.0	0.0	0.0	0.0	0.0	0.0	0.0	0.0	0.0	2.0	3.0	598.0	452.0	195.0	324.0
OTU181046151	Bacteria; Proteobacteria; Betaproteobacteria; Burkholderiales; Comamonadaceae	1.0	0.0	0.0	0.0	19.0	34.0	98.0	146.0	196.0	31.0	43.0	0.0	0.0	0.0	0.0	0.0	0.0	0.0	0.0	0.0	2.0	0.0	0.0	2.0	0.0	0.0	0.0	0.0
OTU130981368	Bacteria; Proteobacteria; Betaproteobacteria; B1-7BS	0.0	2.0	0.0	1.0	0.0	0.0	0.0	0.0	0.0	0.0	0.0	0.0	0.0	0.0	0.0	4.0	0.0	0.0	0.0	0.0	0.0	0.0	1.0	4.0	49.0	115.0	79.0	85.0
OTU517854131	Bacteria; Acidobacteria; Subgroup 9; uncultured bacterium; uncultured bacterium; uncultured bacterium; uncultured bacterium	0.0	0.0	0.0	0.0	0.0	0.0	0.0	0.0	0.0	0.0	0.0	0.0	0.0	0.0	0.0	1.0	0.0	0.0	0.0	0.0	0.0	0.0	1.0	1.0	240.0	241.0	131.0	143.0
OTU686202314	Bacteria; Proteobacteria; Deltaproteobacteria; Myxococcales; Vulgatibacteraceae; Vulgatibacter	0.0	0.0	0.0	0.0	0.0	0.0	0.0	0.0	0.0	0.0	0.0	0.0	0.0	0.0	0.0	0.0	0.0	0.0	0.0	0.0	0.0	0.0	0.0	0.0	142.0	76.0	27.0	38.0
OTU373138894	Bacteria; Chloroflexi; TK10; uncultured bacterium; uncultured bacterium; uncultured bacterium; uncultured bacterium	0.0	0.0	0.0	0.0	0.0	0.0	0.0	0.0	0.0	0.0	0.0	0.0	0.0	0.0	0.0	0.0	0.0	0.0	0.0	0.0	0.0	0.0	3.0	1.0	28.0	30.0	234.0	244.0
OTU415028934	Bacteria; Proteobacteria; Alphaproteobacteria; Rhodospirillales; MND8	0.0	0.0	1.0	6.0	0.0	0.0	0.0	0.0	0.0	0.0	0.0	0.0	0.0	0.0	0.0	6.0	0.0	0.0	0.0	0.0	0.0	0.0	5.0	4.0	126.0	64.0	173.0	228.0
OTU737323438	Bacteria; Chloroflexi; Anaerolineae; Anaerolineales; Anaerolineaceae; uncultured; uncultured organism	0.0	0.0	0.0	0.0	0.0	0.0	0.0	0.0	0.0	0.0	0.0	0.0	0.0	0.0	0.0	0.0	0.0	0.0	2.0	6.0	12.0	49.0	29.0	23.0	0.0	0.0	0.0	0.0
OTU53468978	Bacteria; Acidobacteria; Subgroup 6; uncultured bacterium; uncultured bacterium; uncultured bacterium; uncultured bacterium	0.0	0.0	0.0	1.0	0.0	0.0	0.0	0.0	0.0	0.0	0.0	0.0	0.0	0.0	0.0	0.0	0.0	0.0	0.0	0.0	0.0	0.0	2.0	0.0	62.0	45.0	43.0	74.0
OTU731852209	Bacteria; Fibrobacteres; Chitinivibrionia; uncultured; uncultured bacterium; uncultured bacterium; uncultured bacterium	0.0	0.0	0.0	0.0	0.0	1.0	0.0	66.0	78.0	37.0	11.0	0.0	0.0	0.0	0.0	0.0	0.0	0.0	0.0	0.0	0.0	0.0	0.0	0.0	0.0	0.0	0.0	0.0
OTU580575680	Bacteria; Spirochaetae; Spirochaetes; Spirochaetales; V2072-189E03	0.0	1.0	1.0	0.0	13.0	12.0	4.0	9.0	68.0	49.0	62.0	0.0	0.0	0.0	0.0	0.0	0.0	0.0	0.0	0.0	0.0	0.0	0.0	0.0	0.0	0.0	0.0	0.0
OTU120351405	Bacteria; Ignavibacteriae; Ignavibacteria; Ignavibacteriales; IheB3-7; uncultured bacterium; uncultured bacterium	0.0	0.0	0.0	0.0	4.0	0.0	4.0	49.0	60.0	2.0	3.0	0.0	0.0	0.0	0.0	0.0	0.0	0.0	0.0	0.0	0.0	0.0	0.0	0.0	0.0	0.0	0.0	0.0
OTU401012710	Unassigned	0.0	0.0	0.0	0.0	0.0	0.0	19.0	96.0	90.0	1.0	5.0	0.0	0.0	0.0	0.0	0.0	0.0	0.0	0.0	0.0	0.0	0.0	0.0	0.0	0.0	0.0	0.0	0.0
OTU285531214	Bacteria; Chloroflexi; SBR2076; uncultured bacterium; uncultured bacterium; uncultured bacterium; uncultured bacterium	0.0	1.0	0.0	0.0	0.0	0.0	0.0	0.0	0.0	0.0	0.0	0.0	0.0	0.0	0.0	0.0	0.0	41.0	39.0	30.0	43.0	151.0	95.0	88.0	0.0	0.0	0.0	0.0
OTU861557792	Bacteria; Acidobacteria; Subgroup 6; uncultured bacterium; uncultured bacterium; uncultured bacterium; uncultured bacterium	0.0	0.0	0.0	0.0	0.0	0.0	0.0	0.0	0.0	0.0	0.0	0.0	0.0	0.0	0.0	0.0	0.0	0.0	0.0	0.0	0.0	0.0	1.0	0.0	29.0	31.0	38.0	25.0
OTU223844669	Unassigned	0.0	0.0	0.0	0.0	0.0	0.0	0.0	0.0	0.0	128.0	187.0	0.0	0.0	0.0	0.0	0.0	0.0	0.0	0.0	0.0	0.0	0.0	0.0	0.0	0.0	0.0	0.0	0.0
OTU559218943	Bacteria; Chloroflexi; Anaerolineae; Anaerolineales; Anaerolineaceae; uncultured; uncultured bacterium	0.0	0.0	0.0	0.0	0.0	0.0	0.0	0.0	0.0	0.0	0.0	0.0	0.0	0.0	0.0	0.0	0.0	85.0	93.0	33.0	21.0	140.0	56.0	51.0	0.0	0.0	0.0	0.0
OTU579183274	Bacteria; LCP-89; uncultured bacterium; uncultured bacterium; uncultured bacterium; uncultured bacterium; uncultured bacterium	0.0	0.0	0.0	0.0	0.0	0.0	0.0	2.0	1.0	70.0	142.0	0.0	0.0	0.0	0.0	0.0	0.0	0.0	0.0	0.0	0.0	0.0	0.0	0.0	0.0	0.0	0.0	0.0
OTU39056525	Bacteria; Proteobacteria; Deltaproteobacteria; Desulfobacterales; Desulfobacteraceae; Candidatus Magnetananas	0.0	0.0	0.0	0.0	12.0	8.0	0.0	0.0	1.0	125.0	171.0	0.0	0.0	0.0	0.0	0.0	0.0	0.0	0.0	0.0	0.0	0.0	0.0	0.0	0.0	0.0	0.0	0.0
OTU593881536	Bacteria; Ignavibacteriae; Ignavibacteria; Ignavibacteriales; Ignavibacteriaceae; Ignavibacterium	0.0	0.0	1.0	1.0	0.0	0.0	0.0	0.0	0.0	0.0	0.0	0.0	0.0	0.0	0.0	0.0	0.0	3.0	2.0	9.0	45.0	24.0	16.0	11.0	0.0	0.0	0.0	0.0
OTU595702345	Bacteria; Proteobacteria; Alphaproteobacteria; Rhodospirillales; Rhodospirillaceae; uncultured	0.0	0.0	0.0	0.0	9.0	2.0	46.0	465.0	155.0	39.0	45.0	0.0	0.0	1.0	0.0	0.0	0.0	0.0	0.0	0.0	0.0	0.0	0.0	0.0	0.0	0.0	0.0	0.0
OTU844688570	Bacteria; Aminicenantes; uncultured bacterium; uncultured bacterium; uncultured bacterium; uncultured bacterium; uncultured bacterium	0.0	0.0	0.0	0.0	0.0	0.0	0.0	0.0	0.0	139.0	86.0	0.0	0.0	0.0	0.0	0.0	0.0	0.0	0.0	0.0	0.0	0.0	0.0	0.0	0.0	0.0	0.0	0.0
OTU815610043	Bacteria; Proteobacteria; Alphaproteobacteria; Rickettsiales; SM2D12; uncultured bacterium; uncultured bacterium	0.0	0.0	0.0	0.0	5.0	0.0	10.0	44.0	78.0	0.0	0.0	0.0	0.0	0.0	0.0	0.0	0.0	0.0	0.0	0.0	0.0	0.0	0.0	0.0	0.0	0.0	0.0	0.0
OTU974649746	Bacteria; Proteobacteria; Alphaproteobacteria; Rhizobiales; Rhodobiaceae; uncultured; uncultured bacterium	2.0	6.0	5.0	11.0	0.0	0.0	0.0	0.0	0.0	0.0	1.0	0.0	0.0	1.0	0.0	20.0	0.0	0.0	0.0	0.0	0.0	4.0	1.0	1.0	271.0	314.0	102.0	89.0
OTU998713723	Bacteria; Chloroflexi; Anaerolineae; Anaerolineales; Anaerolineaceae; uncultured; Ambiguous_taxa	0.0	0.0	0.0	0.0	0.0	0.0	0.0	0.0	0.0	0.0	0.0	0.0	0.0	0.0	0.0	0.0	0.0	24.0	33.0	6.0	30.0	35.0	9.0	8.0	0.0	0.0	0.0	0.0
OTU614418926	Bacteria; Chloroflexi; Anaerolineae; Anaerolineales; Anaerolineaceae; Leptolinea; uncultured bacterium	0.0	0.0	0.0	0.0	0.0	0.0	2.0	28.0	23.0	43.0	80.0	0.0	0.0	0.0	0.0	0.0	0.0	0.0	0.0	0.0	0.0	0.0	0.0	0.0	0.0	0.0	0.0	0.0
OTU172574424	Bacteria; Proteobacteria; Alphaproteobacteria; Rhodospirillales; Rhodospirillaceae; Niveispirillum; Ambiguous_taxa	0.0	0.0	1.0	0.0	3.0	4.0	29.0	40.0	43.0	1.0	1.0	0.0	0.0	2.0	0.0	0.0	0.0	0.0	0.0	0.0	0.0	0.0	0.0	0.0	0.0	0.0	0.0	0.0
OTU833576968	Bacteria; Proteobacteria; Betaproteobacteria; Burkholderiales; Comamonadaceae; Leptothrix	2.0	1.0	0.0	0.0	6.0	4.0	2.0	21.0	8.0	2.0	3.0	2.0	0.0	92.0	0.0	0.0	0.0	0.0	0.0	6.0	45.0	5.0	8.0	7.0	0.0	0.0	0.0	0.0
OTU394176182	Bacteria; Firmicutes; Clostridia; Clostridiales; MAT-CR-H4-C10; uncultured bacterium; uncultured bacterium	0.0	0.0	0.0	0.0	1.0	0.0	0.0	2.0	0.0	76.0	125.0	0.0	0.0	0.0	0.0	0.0	0.0	0.0	0.0	0.0	0.0	0.0	0.0	0.0	0.0	0.0	0.0	0.0
OTU66811514	Bacteria; Proteobacteria; Gammaproteobacteria; Methylococcales; Methylococcaceae	0.0	0.0	0.0	0.0	7.0	1.0	216.0	348.0	33.0	1.0	2.0	0.0	0.0	0.0	0.0	0.0	0.0	0.0	0.0	0.0	0.0	0.0	1.0	1.0	12.0	23.0	10.0	15.0
OTU427802039	Bacteria; Acidobacteria; Holophagae; Subgroup 7; Ambiguous_taxa; Ambiguous_taxa; Ambiguous_taxa	0.0	0.0	0.0	0.0	0.0	0.0	0.0	0.0	0.0	0.0	0.0	0.0	0.0	0.0	0.0	0.0	0.0	0.0	0.0	0.0	0.0	0.0	1.0	1.0	1289.0	368.0	60.0	95.0
OTU435731055	Bacteria; Acidobacteria; Holophagae; Subgroup 7; uncultured bacterium; uncultured bacterium; uncultured bacterium	0.0	1.0	0.0	0.0	0.0	0.0	0.0	0.0	0.0	0.0	0.0	0.0	0.0	0.0	0.0	7.0	0.0	0.0	0.0	0.0	0.0	0.0	0.0	1.0	40.0	46.0	37.0	21.0
OTU452106546	Bacteria; Proteobacteria; Deltaproteobacteria; NB1-j; uncultured bacterium; uncultured bacterium; uncultured bacterium	0.0	0.0	0.0	1.0	0.0	0.0	0.0	0.0	0.0	0.0	0.0	0.0	0.0	0.0	0.0	0.0	0.0	0.0	0.0	0.0	0.0	0.0	1.0	0.0	47.0	35.0	47.0	66.0
OTU110032403	Archaea; Thaumarchaeota; AK59; uncultured archaeon; uncultured archaeon; uncultured archaeon; uncultured archaeon	0.0	0.0	0.0	0.0	0.0	0.0	0.0	0.0	0.0	0.0	0.0	0.0	0.0	0.0	0.0	0.0	0.0	6.0	8.0	11.0	47.0	92.0	25.0	42.0	0.0	0.0	0.0	0.0
OTU643800306	Unassigned	0.0	0.0	0.0	0.0	8.0	13.0	170.0	1549.0	537.0	131.0	173.0	0.0	0.0	0.0	0.0	0.0	0.0	0.0	0.0	0.0	0.0	0.0	0.0	0.0	0.0	0.0	0.0	0.0
OTU928931941	Bacteria; Acidobacteria; Subgroup 22; uncultured bacterium; uncultured bacterium; uncultured bacterium; uncultured bacterium	0.0	0.0	0.0	0.0	0.0	0.0	0.0	0.0	0.0	0.0	0.0	0.0	0.0	0.0	0.0	0.0	0.0	0.0	0.0	0.0	0.0	0.0	0.0	0.0	8.0	0.0	0.0	116.0
OTU16932803	Bacteria; Proteobacteria; Alphaproteobacteria; Rhizobiales; Hyphomicrobiaceae	0.0	3.0	0.0	3.0	4.0	14.0	4.0	28.0	43.0	63.0	72.0	0.0	0.0	0.0	0.0	1.0	0.0	0.0	0.0	0.0	32.0	0.0	0.0	0.0	10.0	9.0	0.0	0.0
OTU396974380	Unassigned	1.0	21.0	11.0	13.0	0.0	0.0	27.0	2.0	66.0	35.0	53.0	0.0	2.0	0.0	0.0	5.0	0.0	0.0	0.0	0.0	0.0	0.0	0.0	0.0	0.0	0.0	0.0	0.0
OTU244081849	Bacteria; Proteobacteria; Deltaproteobacteria; Desulfobacterales; Desulfobacteraceae; uncultured; uncultured bacterium	0.0	0.0	0.0	0.0	0.0	1.0	0.0	0.0	0.0	963.0	859.0	0.0	0.0	0.0	0.0	0.0	0.0	0.0	0.0	0.0	0.0	0.0	0.0	0.0	0.0	0.0	0.0	0.0
OTU581723124	Unassigned	0.0	4.0	1.0	1.0	0.0	0.0	0.0	0.0	0.0	0.0	0.0	0.0	0.0	0.0	0.0	0.0	0.0	23.0	14.0	30.0	117.0	272.0	44.0	37.0	0.0	0.0	0.0	0.0
OTU992550028	Bacteria; AC1; uncultured bacterium; uncultured bacterium; uncultured bacterium; uncultured bacterium; uncultured bacterium	0.0	0.0	0.0	0.0	0.0	0.0	0.0	0.0	0.0	0.0	0.0	0.0	0.0	0.0	0.0	0.0	0.0	0.0	3.0	15.0	31.0	188.0	55.0	57.0	0.0	0.0	0.0	0.0
OTU90178248	Bacteria; Fibrobacteres; Chitinivibrionia; possible order 07; uncultured bacterium; uncultured bacterium; uncultured bacterium	0.0	1.0	0.0	0.0	0.0	0.0	0.0	0.0	0.0	0.0	0.0	0.0	0.0	0.0	0.0	0.0	0.0	12.0	15.0	23.0	132.0	126.0	40.0	25.0	0.0	0.0	0.0	0.0
OTU64618700	Bacteria; Planctomycetes; Pla3 lineage; uncultured bacterium; uncultured bacterium; uncultured bacterium; uncultured bacterium	0.0	0.0	0.0	0.0	0.0	0.0	0.0	0.0	0.0	0.0	0.0	0.0	0.0	0.0	0.0	1.0	0.0	0.0	0.0	0.0	0.0	0.0	0.0	0.0	34.0	19.0	27.0	40.0
OTU659619750	Bacteria; Acidobacteria; Solibacteres; Solibacterales; Solibacteraceae (Subgroup 3); Bryobacter	0.0	0.0	0.0	0.0	4.0	6.0	32.0	219.0	174.0	56.0	29.0	0.0	0.0	0.0	0.0	0.0	0.0	0.0	0.0	0.0	0.0	0.0	0.0	0.0	0.0	0.0	0.0	0.0
OTU657585789	Bacteria; Nitrospirae; Nitrospira; Nitrospirales; Nitrospiraceae; uncultured; uncultured bacterium	1.0	5.0	0.0	5.0	0.0	0.0	0.0	0.0	0.0	0.0	1.0	0.0	0.0	0.0	0.0	0.0	0.0	13.0	22.0	17.0	12.0	5.0	67.0	28.0	0.0	0.0	0.0	0.0
OTU59313073	Bacteria; Chloroflexi; SHA-26; uncultured Chloroflexi bacterium; uncultured Chloroflexi bacterium; uncultured Chloroflexi bacterium; uncultured Chloroflexi bacterium	0.0	0.0	0.0	1.0	0.0	0.0	0.0	0.0	0.0	0.0	0.0	0.0	0.0	0.0	0.0	0.0	0.0	38.0	70.0	47.0	225.0	410.0	50.0	38.0	0.0	0.0	0.0	0.0
OTU607856814	Bacteria; Planctomycetes; Planctomycetacia; Planctomycetales; Planctomycetaceae; uncultured	0.0	0.0	0.0	0.0	0.0	0.0	0.0	0.0	0.0	0.0	0.0	0.0	0.0	0.0	0.0	0.0	0.0	0.0	0.0	0.0	0.0	0.0	0.0	1.0	86.0	16.0	6.0	28.0
OTU776902476	Bacteria; Chloroflexi; JG30-KF-CM66; uncultured bacterium; uncultured bacterium; uncultured bacterium; uncultured bacterium	0.0	0.0	0.0	0.0	0.0	0.0	0.0	0.0	0.0	0.0	0.0	0.0	0.0	0.0	0.0	0.0	0.0	0.0	0.0	0.0	0.0	0.0	0.0	0.0	24.0	74.0	33.0	9.0
OTU938980186	Bacteria; Cloacimonetes; uncultured bacterium; uncultured bacterium; uncultured bacterium; uncultured bacterium; uncultured bacterium	0.0	1.0	0.0	0.0	0.0	0.0	0.0	0.0	0.0	0.0	0.0	0.0	0.0	0.0	0.0	0.0	0.0	10.0	10.0	15.0	43.0	107.0	18.0	14.0	0.0	0.0	0.0	0.0
OTU115711652	Bacteria; Nitrospirae; Nitrospira; Nitrospirales; Nitrospiraceae; uncultured	0.0	0.0	0.0	0.0	0.0	0.0	0.0	0.0	0.0	0.0	0.0	0.0	0.0	0.0	0.0	0.0	0.0	0.0	1.0	0.0	5.0	3.0	85.0	43.0	0.0	0.0	0.0	0.0
OTU571615985	Bacteria; Chlorobi; Chlorobia; Chlorobiales; OPB56; uncultured bacterium; uncultured bacterium	0.0	0.0	0.0	0.0	0.0	0.0	0.0	0.0	0.0	56.0	138.0	0.0	0.0	0.0	0.0	0.0	0.0	0.0	0.0	0.0	0.0	0.0	0.0	0.0	0.0	0.0	0.0	0.0
OTU772824518	Bacteria; Proteobacteria; Deltaproteobacteria; Oligoflexales; 0319-6G20; uncultured delta proteobacterium; uncultured delta proteobacterium	0.0	0.0	0.0	0.0	0.0	0.0	0.0	0.0	0.0	0.0	0.0	0.0	0.0	0.0	0.0	0.0	0.0	25.0	13.0	22.0	110.0	69.0	9.0	5.0	0.0	0.0	0.0	0.0
OTU956823396	Unassigned	0.0	0.0	0.0	0.0	0.0	0.0	0.0	0.0	0.0	0.0	0.0	0.0	0.0	0.0	0.0	0.0	0.0	0.0	0.0	0.0	0.0	0.0	3.0	0.0	960.0	894.0	76.0	0.0
OTU245022064	Bacteria; Planctomycetes; vadinHA49; uncultured bacterium; uncultured bacterium; uncultured bacterium; uncultured bacterium	0.0	0.0	0.0	0.0	120.0	139.0	29.0	62.0	104.0	6.0	10.0	0.0	0.0	0.0	0.0	0.0	0.0	0.0	0.0	0.0	0.0	0.0	0.0	0.0	0.0	0.0	0.0	0.0
OTU335487465	Bacteria; Planctomycetes; Phycisphaerae; mle1-8; uncultured bacterium; uncultured bacterium; uncultured bacterium	0.0	0.0	0.0	0.0	0.0	0.0	0.0	0.0	0.0	0.0	0.0	0.0	0.0	0.0	0.0	0.0	0.0	0.0	0.0	0.0	0.0	0.0	0.0	1.0	6.0	9.0	86.0	278.0
OTU561358802	Bacteria; Proteobacteria; Deltaproteobacteria; Myxococcales; PS-B29; uncultured bacterium; uncultured bacterium	0.0	0.0	0.0	0.0	2.0	8.0	8.0	0.0	124.0	21.0	34.0	0.0	0.0	0.0	0.0	0.0	0.0	0.0	0.0	0.0	0.0	2.0	0.0	0.0	0.0	0.0	0.0	0.0
OTU516565501	Bacteria; Verrucomicrobia; OPB35 soil group; uncultured bacterium; uncultured bacterium; uncultured bacterium; uncultured bacterium	0.0	0.0	0.0	0.0	0.0	0.0	0.0	0.0	0.0	1.0	0.0	0.0	0.0	0.0	0.0	0.0	0.0	0.0	0.0	0.0	0.0	0.0	2.0	1.0	417.0	308.0	82.0	204.0
OTU131540178	Bacteria; SR1 (Absconditabacteria); uncultured bacterium; uncultured bacterium; uncultured bacterium; uncultured bacterium; uncultured bacterium	0.0	0.0	0.0	0.0	0.0	0.0	38.0	91.0	150.0	0.0	0.0	0.0	0.0	0.0	0.0	0.0	0.0	0.0	0.0	0.0	0.0	0.0	0.0	0.0	0.0	0.0	0.0	0.0
OTU876910212	Bacteria; Planctomycetes; Planctomycetacia; Planctomycetales; Planctomycetaceae; Pirellula; Ambiguous_taxa	0.0	0.0	0.0	0.0	2.0	9.0	7.0	75.0	44.0	4.0	7.0	0.0	0.0	0.0	0.0	0.0	0.0	0.0	0.0	0.0	0.0	0.0	0.0	0.0	0.0	0.0	0.0	0.0
OTU675180719	Bacteria; Spirochaetae; Spirochaetes; Spirochaetales; Leptospiraceae; uncultured; uncultured organism	0.0	0.0	0.0	0.0	0.0	3.0	22.0	142.0	448.0	74.0	115.0	0.0	0.0	0.0	0.0	0.0	0.0	0.0	0.0	0.0	0.0	0.0	0.0	0.0	0.0	0.0	0.0	0.0
OTU902901712	Bacteria; Proteobacteria; Betaproteobacteria; Burkholderiales; Oxalobacteraceae; Massilia	0.0	1.0	0.0	0.0	1.0	1.0	0.0	0.0	0.0	0.0	0.0	0.0	2.0	0.0	0.0	0.0	0.0	0.0	1.0	26.0	83.0	27.0	51.0	13.0	0.0	0.0	0.0	0.0
OTU217186440	Bacteria; Proteobacteria; Alphaproteobacteria; Rhodospirillales; Rhodospirillaceae; Tistlia	0.0	0.0	0.0	0.0	0.0	0.0	0.0	0.0	0.0	0.0	0.0	0.0	0.0	0.0	0.0	0.0	0.0	0.0	0.0	0.0	0.0	0.0	0.0	0.0	156.0	276.0	5.0	0.0
OTU178195079	Bacteria; Planctomycetes; Phycisphaerae; Tepidisphaerales; Tepidisphaeraceae; uncultured bacterium; uncultured bacterium	0.0	0.0	1.0	0.0	0.0	0.0	0.0	0.0	0.0	0.0	0.0	0.0	0.0	0.0	0.0	3.0	0.0	0.0	0.0	0.0	0.0	0.0	5.0	4.0	791.0	281.0	84.0	324.0
OTU431620479	Bacteria; Bacteroidetes; Sphingobacteriia; Sphingobacteriales; Saprospiraceae; Lewinella; uncultured bacterium	0.0	0.0	0.0	0.0	0.0	0.0	0.0	0.0	0.0	0.0	0.0	0.0	0.0	0.0	0.0	3.0	1.0	0.0	0.0	0.0	0.0	0.0	17.0	8.0	549.0	504.0	885.0	1597.0
OTU553390505	Unassigned	0.0	0.0	0.0	0.0	0.0	0.0	0.0	0.0	0.0	0.0	7.0	0.0	0.0	0.0	0.0	0.0	0.0	0.0	0.0	0.0	0.0	0.0	4.0	0.0	21.0	18.0	82.0	102.0
OTU71046303	Bacteria; Proteobacteria; Alphaproteobacteria; Rhodospirillales; MNC12; uncultured bacterium; uncultured bacterium	0.0	0.0	0.0	0.0	0.0	0.0	0.0	0.0	0.0	0.0	0.0	0.0	0.0	0.0	0.0	0.0	0.0	0.0	0.0	0.0	0.0	2.0	4.0	2.0	34.0	23.0	114.0	46.0
OTU658133704	Bacteria; Spirochaetae; Spirochaetes; Spirochaetales; Spirochaetaceae; Spirochaeta 2; uncultured bacterium	0.0	0.0	0.0	0.0	2.0	2.0	1.0	6.0	18.0	65.0	76.0	0.0	0.0	0.0	0.0	0.0	0.0	0.0	0.0	0.0	0.0	0.0	0.0	0.0	0.0	0.0	0.0	0.0
OTU665576485	Bacteria; Planctomycetes; Phycisphaerae; CCM11a	0.0	0.0	0.0	0.0	0.0	0.0	0.0	0.0	0.0	0.0	0.0	0.0	0.0	0.0	0.0	0.0	0.0	7.0	10.0	13.0	44.0	57.0	20.0	7.0	0.0	0.0	0.0	0.0
OTU406896721	Bacteria; Verrucomicrobia; Verrucomicrobia Incertae Sedis; Unknown Order; Unknown Family; Candidatus Methylacidiphilum	0.0	0.0	0.0	0.0	0.0	0.0	0.0	0.0	0.0	0.0	0.0	0.0	0.0	0.0	0.0	0.0	0.0	0.0	0.0	0.0	0.0	0.0	2.0	0.0	2147.0	460.0	71.0	256.0
OTU477831436	Bacteria; Proteobacteria; Deltaproteobacteria; Bdellovibrionales; Bacteriovoracaceae; Halobacteriovorax	0.0	0.0	0.0	0.0	0.0	1.0	28.0	158.0	198.0	0.0	0.0	0.0	0.0	0.0	0.0	0.0	0.0	0.0	0.0	0.0	0.0	0.0	0.0	0.0	0.0	0.0	0.0	0.0
OTU196382857	Bacteria; Chloroflexi; Anaerolineae; Anaerolineales; Anaerolineaceae; uncultured	0.0	0.0	0.0	0.0	0.0	0.0	0.0	0.0	0.0	0.0	0.0	0.0	0.0	0.0	0.0	0.0	0.0	0.0	0.0	0.0	0.0	0.0	0.0	0.0	62.0	0.0	1.0	77.0
OTU365477094	Bacteria; Chloroflexi; Anaerolineae; Anaerolineales; Anaerolineaceae; uncultured; uncultured bacterium	0.0	0.0	0.0	0.0	1.0	3.0	19.0	72.0	250.0	11.0	25.0	0.0	0.0	0.0	0.0	0.0	0.0	0.0	0.0	0.0	0.0	0.0	2.0	1.0	114.0	14.0	59.0	41.0
OTU573668957	Bacteria; Proteobacteria; Deltaproteobacteria; Myxococcales; Haliangiaceae; Haliangium; uncultured bacterium	0.0	0.0	0.0	0.0	0.0	0.0	0.0	0.0	0.0	0.0	0.0	0.0	0.0	0.0	0.0	0.0	0.0	0.0	0.0	0.0	0.0	0.0	1.0	1.0	27.0	41.0	40.0	0.0
OTU115988176	Bacteria; Proteobacteria; Gammaproteobacteria; uncultured	0.0	0.0	0.0	0.0	0.0	0.0	0.0	0.0	0.0	0.0	0.0	0.0	0.0	0.0	0.0	1.0	0.0	0.0	0.0	0.0	0.0	0.0	0.0	1.0	88.0	7.0	51.0	89.0
OTU663650297	Bacteria; Acidobacteria; Subgroup 5; Ambiguous_taxa; Ambiguous_taxa; Ambiguous_taxa; Ambiguous_taxa	0.0	0.0	0.0	0.0	0.0	0.0	0.0	0.0	0.0	0.0	0.0	0.0	0.0	0.0	0.0	0.0	0.0	0.0	0.0	0.0	0.0	0.0	1.0	0.0	98.0	72.0	18.0	51.0
OTU716627502	Bacteria; Proteobacteria; Deltaproteobacteria; Desulfovibrionales; Desulfovibrionaceae; Desulfovibrio; uncultured organism	0.0	0.0	0.0	0.0	0.0	0.0	18.0	50.0	90.0	1.0	1.0	0.0	0.0	0.0	0.0	0.0	0.0	0.0	0.0	0.0	0.0	0.0	0.0	0.0	0.0	0.0	0.0	0.0
OTU890811015	Bacteria; Acidobacteria; c5LKS83; uncultured Acidobacterium sp.; uncultured Acidobacterium sp.; uncultured Acidobacterium sp.; uncultured Acidobacterium sp.	0.0	0.0	0.0	1.0	0.0	0.0	0.0	0.0	0.0	0.0	0.0	0.0	0.0	0.0	0.0	0.0	0.0	9.0	11.0	26.0	68.0	236.0	83.0	42.0	0.0	0.0	0.0	0.0
OTU624967837	Archaea; Bathyarchaeota; uncultured archaeon; uncultured archaeon; uncultured archaeon; uncultured archaeon; uncultured archaeon	0.0	1.0	0.0	0.0	0.0	0.0	0.0	0.0	0.0	0.0	0.0	0.0	0.0	0.0	0.0	0.0	0.0	3.0	2.0	4.0	47.0	67.0	8.0	7.0	0.0	0.0	0.0	0.0
OTU220669789	Bacteria; Chloroflexi; Anaerolineae; Anaerolineales; Anaerolineaceae; uncultured; Ambiguous_taxa	0.0	0.0	0.0	0.0	11.0	7.0	35.0	0.0	125.0	0.0	4.0	0.0	0.0	0.0	0.0	0.0	0.0	0.0	0.0	0.0	0.0	0.0	0.0	0.0	0.0	0.0	0.0	0.0
OTU53455551	Bacteria; Bacteroidetes; Cytophagia; Cytophagales; Cytophagaceae; uncultured; uncultured bacterium	0.0	0.0	0.0	0.0	0.0	0.0	0.0	0.0	0.0	0.0	0.0	0.0	0.0	0.0	0.0	0.0	0.0	0.0	0.0	0.0	0.0	0.0	3.0	3.0	4077.0	351.0	132.0	193.0
OTU907162436	Bacteria; Spirochaetae; Spirochaetes; Spirochaetales; Spirochaetaceae; uncultured; uncultured bacterium	0.0	0.0	0.0	0.0	0.0	0.0	34.0	94.0	20.0	3.0	0.0	0.0	0.0	0.0	0.0	0.0	0.0	0.0	0.0	0.0	0.0	0.0	0.0	0.0	0.0	0.0	0.0	0.0
OTU99089450	Bacteria; Proteobacteria; Deltaproteobacteria; Oligoflexales; 0319-6G20; uncultured bacterium; uncultured bacterium	0.0	0.0	0.0	0.0	0.0	0.0	6.0	55.0	73.0	0.0	0.0	0.0	0.0	0.0	0.0	0.0	0.0	0.0	0.0	0.0	0.0	0.0	0.0	0.0	0.0	0.0	0.0	0.0
OTU173988504	Archaea; Euryarchaeota; Thermoplasmata; Thermoplasmatales; Terrestrial Miscellaneous Gp(TMEG); uncultured archaeon; uncultured archaeon	0.0	0.0	0.0	0.0	0.0	0.0	0.0	0.0	0.0	0.0	0.0	0.0	0.0	0.0	0.0	0.0	0.0	0.0	3.0	6.0	39.0	74.0	11.0	23.0	0.0	0.0	0.0	0.0
OTU501776191	Bacteria; Saccharibacteria; uncultured bacterium; uncultured bacterium; uncultured bacterium; uncultured bacterium; uncultured bacterium	1.0	0.0	0.0	0.0	0.0	0.0	0.0	0.0	0.0	0.0	0.0	0.0	0.0	0.0	0.0	0.0	0.0	0.0	0.0	0.0	0.0	0.0	0.0	0.0	38.0	198.0	21.0	20.0
OTU268643172	Bacteria; Proteobacteria; Deltaproteobacteria; Desulfovibrionales; Desulfovibrionaceae; Desulfovibrio; uncultured bacterium	0.0	0.0	1.0	0.0	2.0	1.0	4.0	120.0	21.0	18.0	16.0	0.0	0.0	0.0	0.0	0.0	0.0	0.0	0.0	0.0	0.0	0.0	0.0	0.0	0.0	0.0	0.0	0.0
OTU591210234	Unassigned	0.0	0.0	0.0	0.0	0.0	1.0	34.0	15.0	182.0	0.0	0.0	0.0	0.0	0.0	0.0	0.0	0.0	0.0	0.0	0.0	0.0	0.0	0.0	0.0	0.0	0.0	0.0	0.0
OTU509397976	Bacteria; Bacteroidetes	0.0	0.0	0.0	0.0	8.0	5.0	10.0	0.0	86.0	24.0	15.0	0.0	0.0	0.0	0.0	0.0	0.0	0.0	0.0	0.0	0.0	0.0	0.0	0.0	0.0	0.0	0.0	0.0
OTU830093322	Bacteria; Proteobacteria; Deltaproteobacteria; Bradymonadales	0.0	0.0	0.0	0.0	0.0	0.0	0.0	0.0	0.0	0.0	0.0	0.0	0.0	0.0	0.0	0.0	0.0	0.0	0.0	0.0	0.0	0.0	0.0	0.0	123.0	117.0	53.0	46.0
OTU861229629	Bacteria; Spirochaetae; Spirochaetes; Spirochaetales; Spirochaetaceae; Spirochaeta 2; uncultured bacterium	0.0	0.0	0.0	0.0	0.0	0.0	0.0	0.0	0.0	0.0	0.0	0.0	0.0	0.0	0.0	0.0	0.0	7.0	22.0	12.0	79.0	125.0	13.0	20.0	0.0	0.0	0.0	0.0
OTU673086666	Unassigned	0.0	1.0	0.0	0.0	0.0	0.0	0.0	0.0	0.0	0.0	0.0	0.0	0.0	0.0	0.0	0.0	0.0	3.0	0.0	13.0	38.0	66.0	41.0	28.0	0.0	0.0	0.0	0.0
OTU418637565	Bacteria; Chloroflexi; Ardenticatenia; uncultured	0.0	0.0	0.0	0.0	0.0	0.0	0.0	0.0	0.0	0.0	0.0	0.0	0.0	0.0	0.0	0.0	0.0	0.0	0.0	0.0	0.0	0.0	1.0	0.0	498.0	3.0	30.0	5.0
OTU457353200	Bacteria; Verrucomicrobia; OPB35 soil group; uncultured bacterium; uncultured bacterium; uncultured bacterium; uncultured bacterium	0.0	0.0	0.0	0.0	3.0	8.0	30.0	303.0	117.0	23.0	58.0	0.0	0.0	0.0	0.0	0.0	0.0	0.0	0.0	0.0	0.0	0.0	0.0	0.0	0.0	0.0	0.0	0.0
OTU597187556	Bacteria; Chloroflexi; S085; uncultured bacterium; uncultured bacterium; uncultured bacterium; uncultured bacterium	0.0	0.0	0.0	0.0	0.0	0.0	0.0	0.0	0.0	0.0	0.0	0.0	0.0	0.0	0.0	0.0	0.0	0.0	0.0	0.0	0.0	0.0	0.0	2.0	1082.0	1370.0	74.0	180.0
OTU8858993	Bacteria; Parcubacteria; Candidatus Falkowbacteria; uncultured bacterium; uncultured bacterium; uncultured bacterium; uncultured bacterium	0.0	0.0	0.0	1.0	12.0	31.0	121.0	1270.0	678.0	2.0	14.0	0.0	0.0	0.0	0.0	0.0	0.0	0.0	0.0	0.0	0.0	0.0	0.0	0.0	0.0	0.0	0.0	0.0
OTU703381293	Bacteria; Firmicutes; Bacilli; Bacillales; Paenibacillaceae; Paenibacillus; Ambiguous_taxa	0.0	18.0	20.0	96.0	0.0	0.0	0.0	0.0	0.0	0.0	0.0	0.0	0.0	0.0	0.0	2.0	0.0	0.0	0.0	0.0	0.0	0.0	3.0	0.0	0.0	0.0	0.0	0.0
OTU305633004	Bacteria; Omnitrophica; uncultured bacterium; uncultured bacterium; uncultured bacterium; uncultured bacterium; uncultured bacterium	0.0	0.0	2.0	0.0	0.0	0.0	0.0	0.0	0.0	0.0	0.0	0.0	0.0	0.0	0.0	0.0	0.0	49.0	40.0	7.0	49.0	28.0	10.0	17.0	0.0	0.0	0.0	0.0
OTU786261543	Bacteria; Bacteroidetes; Sphingobacteriia; Sphingobacteriales; Saprospiraceae; uncultured	0.0	0.0	0.0	0.0	0.0	0.0	0.0	0.0	0.0	0.0	0.0	0.0	0.0	0.0	0.0	0.0	0.0	0.0	0.0	0.0	0.0	0.0	0.0	0.0	196.0	162.0	27.0	114.0
OTU519863480	Bacteria; Planctomycetes; OM190; uncultured bacterium; uncultured bacterium; uncultured bacterium; uncultured bacterium	0.0	0.0	0.0	0.0	0.0	0.0	0.0	0.0	0.0	0.0	0.0	0.0	0.0	0.0	0.0	0.0	0.0	0.0	0.0	0.0	0.0	0.0	0.0	0.0	3.0	107.0	43.0	12.0
OTU764670601	Bacteria; Gracilibacteria	0.0	1.0	1.0	0.0	2.0	2.0	18.0	79.0	139.0	12.0	7.0	0.0	0.0	0.0	0.0	1.0	0.0	0.0	0.0	0.0	0.0	0.0	0.0	0.0	0.0	0.0	0.0	0.0
OTU993135151	Bacteria; Planctomycetes; OM190	0.0	0.0	0.0	0.0	0.0	0.0	0.0	0.0	0.0	0.0	0.0	0.0	0.0	0.0	0.0	0.0	0.0	0.0	0.0	0.0	0.0	0.0	7.0	4.0	29.0	23.0	221.0	120.0
OTU312405772	Archaea; Woesearchaeota (DHVEG-6); uncultured euryarchaeote; uncultured euryarchaeote; uncultured euryarchaeote; uncultured euryarchaeote; uncultured euryarchaeote	0.0	0.0	0.0	0.0	2.0	4.0	11.0	74.0	28.0	5.0	26.0	0.0	0.0	0.0	0.0	0.0	0.0	0.0	0.0	0.0	0.0	0.0	0.0	0.0	0.0	0.0	0.0	0.0
OTU368348139	Bacteria; Bacteroidetes; Bacteroidia; Bacteroidales; Porphyromonadaceae; uncultured; uncultured bacterium	0.0	0.0	0.0	0.0	1.0	0.0	8.0	158.0	14.0	0.0	0.0	0.0	0.0	0.0	0.0	0.0	0.0	0.0	0.0	0.0	0.0	0.0	0.0	0.0	0.0	0.0	0.0	0.0
OTU801119866	Bacteria; Proteobacteria; Deltaproteobacteria; Desulfobacterales; Desulfobacteraceae; uncultured	0.0	0.0	0.0	0.0	1.0	2.0	8.0	36.0	99.0	28.0	13.0	0.0	0.0	0.0	0.0	1.0	1.0	0.0	0.0	0.0	0.0	0.0	0.0	0.0	0.0	0.0	0.0	0.0
OTU524894669	Archaea; Euryarchaeota; Thermoplasmata; Thermoplasmatales; Marine Benthic Group D and DHVEG-1; uncultured archaeon; uncultured archaeon	0.0	0.0	0.0	0.0	0.0	0.0	0.0	0.0	0.0	0.0	0.0	0.0	0.0	0.0	0.0	0.0	0.0	15.0	16.0	3.0	23.0	30.0	19.0	16.0	0.0	0.0	0.0	0.0
OTU465632287	Bacteria; Firmicutes; Clostridia; Clostridiales; Gracilibacteraceae; Lutispora; uncultured bacterium	0.0	0.0	0.0	0.0	75.0	56.0	0.0	0.0	0.0	1.0	0.0	0.0	0.0	0.0	0.0	0.0	0.0	0.0	0.0	0.0	7.0	0.0	0.0	0.0	0.0	0.0	0.0	0.0
OTU281894320	Bacteria; Planctomycetes; Planctomycetacia; Planctomycetales; Planctomycetaceae; uncultured; uncultured bacterium	0.0	0.0	0.0	0.0	0.0	0.0	0.0	0.0	0.0	0.0	0.0	0.0	0.0	0.0	0.0	4.0	0.0	0.0	0.0	0.0	0.0	0.0	1.0	0.0	176.0	41.0	23.0	24.0
OTU246391115	Bacteria; Bacteroidetes; Sphingobacteriia; Sphingobacteriales; ST-12K33; uncultured bacterium; uncultured bacterium	0.0	0.0	0.0	0.0	6.0	7.0	28.0	0.0	88.0	1.0	6.0	0.0	0.0	0.0	0.0	0.0	0.0	0.0	0.0	0.0	0.0	0.0	0.0	0.0	0.0	0.0	0.0	0.0
OTU685599310	Bacteria; Proteobacteria; Deltaproteobacteria; Syntrophobacterales; Syntrophaceae; uncultured	0.0	0.0	0.0	0.0	0.0	0.0	0.0	0.0	0.0	0.0	0.0	0.0	0.0	0.0	0.0	0.0	0.0	0.0	0.0	0.0	0.0	0.0	1.0	0.0	208.0	263.0	29.0	62.0
OTU733762402	Bacteria; Proteobacteria; Alphaproteobacteria; Rhodospirillales; Rhodospirillaceae; uncultured; uncultured bacterium	0.0	0.0	0.0	1.0	0.0	1.0	0.0	1.0	5.0	120.0	497.0	0.0	0.0	0.0	0.0	0.0	0.0	0.0	0.0	0.0	0.0	0.0	0.0	0.0	0.0	0.0	2.0	283.0
OTU612264663	Bacteria; Parcubacteria; Candidatus Nomurabacteria; uncultured bacterium; uncultured bacterium; uncultured bacterium; uncultured bacterium	0.0	0.0	0.0	0.0	0.0	0.0	0.0	0.0	0.0	0.0	0.0	0.0	0.0	0.0	0.0	0.0	0.0	0.0	0.0	0.0	0.0	0.0	0.0	0.0	140.0	4.0	0.0	0.0
OTU910282123	Bacteria; Verrucomicrobia; OPB35 soil group; uncultured bacterium; uncultured bacterium; uncultured bacterium; uncultured bacterium	0.0	0.0	0.0	0.0	2.0	0.0	0.0	0.0	0.0	0.0	0.0	0.0	0.0	0.0	0.0	0.0	0.0	0.0	0.0	0.0	0.0	0.0	2.0	3.0	239.0	34.0	86.0	84.0
OTU909113941	Bacteria; Saccharibacteria; uncultured bacterium; uncultured bacterium; uncultured bacterium; uncultured bacterium; uncultured bacterium	0.0	0.0	2.0	1.0	3.0	11.0	0.0	1.0	0.0	109.0	75.0	0.0	0.0	0.0	0.0	0.0	0.0	0.0	0.0	0.0	0.0	0.0	0.0	0.0	0.0	0.0	0.0	0.0
OTU681020720	Bacteria; Proteobacteria; Deltaproteobacteria; Syntrophobacterales; Syntrophaceae; Desulfomonile	0.0	2.0	0.0	0.0	0.0	0.0	0.0	0.0	0.0	0.0	0.0	0.0	0.0	0.0	0.0	0.0	0.0	36.0	29.0	14.0	50.0	113.0	17.0	10.0	0.0	0.0	0.0	0.0
OTU617974877	Unassigned	0.0	0.0	0.0	0.0	0.0	0.0	0.0	0.0	0.0	0.0	0.0	0.0	0.0	0.0	0.0	0.0	0.0	37.0	28.0	27.0	30.0	63.0	15.0	6.0	0.0	0.0	0.0	0.0
OTU337052666	Bacteria; Bacteroidetes; Cytophagia; Cytophagales; Cytophagaceae; uncultured; Ambiguous_taxa	0.0	0.0	0.0	0.0	0.0	0.0	0.0	1.0	0.0	0.0	0.0	0.0	0.0	0.0	0.0	0.0	0.0	0.0	0.0	0.0	23.0	0.0	0.0	0.0	97.0	4.0	0.0	4.0
OTU452205723	Bacteria; Tectomicrobia; uncultured bacterium; uncultured bacterium; uncultured bacterium; uncultured bacterium; uncultured bacterium	0.0	0.0	0.0	0.0	0.0	0.0	0.0	0.0	0.0	0.0	0.0	0.0	0.0	0.0	0.0	1.0	0.0	0.0	0.0	0.0	0.0	0.0	6.0	5.0	1090.0	833.0	172.0	164.0
OTU621462969	Bacteria; Verrucomicrobia; OPB35 soil group; uncultured bacterium; uncultured bacterium; uncultured bacterium; uncultured bacterium	0.0	0.0	0.0	0.0	0.0	0.0	0.0	0.0	0.0	0.0	0.0	0.0	0.0	0.0	0.0	0.0	0.0	0.0	0.0	0.0	0.0	0.0	0.0	0.0	126.0	0.0	0.0	0.0
OTU307510456	Bacteria; Acidobacteria; Solibacteres; Solibacterales; Solibacteraceae (Subgroup 3); Bryobacter; uncultured bacterium	0.0	0.0	0.0	0.0	0.0	0.0	0.0	0.0	0.0	0.0	0.0	0.0	0.0	0.0	0.0	0.0	0.0	0.0	0.0	0.0	0.0	0.0	2.0	2.0	67.0	5.0	83.0	214.0
OTU82105632	Bacteria; Spirochaetae; Spirochaetes; Spirochaetales; Spirochaetaceae; uncultured; uncultured Spirochaetes bacterium	0.0	0.0	0.0	0.0	0.0	0.0	4.0	209.0	48.0	1.0	1.0	0.0	0.0	0.0	0.0	0.0	0.0	0.0	0.0	0.0	0.0	0.0	0.0	0.0	0.0	0.0	0.0	0.0
OTU537175955	Bacteria; Firmicutes; Clostridia; Clostridiales; Ruminococcaceae; [Eubacterium] coprostanoligenes group	0.0	0.0	1.0	0.0	2.0	4.0	0.0	87.0	4.0	39.0	43.0	0.0	0.0	0.0	0.0	0.0	0.0	0.0	0.0	0.0	0.0	0.0	0.0	0.0	0.0	0.0	0.0	0.0
OTU889106585	Bacteria; BRC1	0.0	0.0	0.0	0.0	0.0	0.0	0.0	0.0	0.0	0.0	0.0	0.0	0.0	0.0	0.0	1.0	1.0	0.0	0.0	0.0	0.0	0.0	6.0	7.0	2824.0	1060.0	373.0	3049.0
OTU218198439	Bacteria; Verrucomicrobia; Spartobacteria; Chthoniobacterales; Chthoniobacterales Incertae Sedis; Terrimicrobium; uncultured bacterium	0.0	0.0	0.0	0.0	108.0	192.0	149.0	1596.0	1409.0	231.0	362.0	0.0	0.0	0.0	0.0	0.0	0.0	0.0	0.0	0.0	0.0	0.0	0.0	0.0	0.0	0.0	5.0	0.0
OTU165796168	Bacteria; Chloroflexi; Anaerolineae; Anaerolineales; Anaerolineaceae; uncultured; uncultured bacterium	0.0	0.0	0.0	0.0	0.0	0.0	0.0	0.0	0.0	0.0	0.0	0.0	0.0	0.0	0.0	0.0	0.0	0.0	0.0	0.0	0.0	0.0	3.0	3.0	693.0	99.0	183.0	161.0
OTU479665041	Bacteria; Chloroflexi; Anaerolineae; Anaerolineales; Anaerolineaceae; uncultured; uncultured bacterium	0.0	0.0	0.0	0.0	24.0	61.0	57.0	144.0	162.0	171.0	123.0	0.0	0.0	0.0	0.0	0.0	0.0	0.0	0.0	0.0	0.0	0.0	0.0	0.0	0.0	0.0	0.0	0.0
OTU569195561	Bacteria; Spirochaetae; Spirochaetes; Spirochaetales; Spirochaetaceae; Spirochaeta 2; uncultured bacterium	0.0	0.0	0.0	0.0	0.0	0.0	0.0	0.0	0.0	0.0	0.0	0.0	0.0	0.0	0.0	0.0	0.0	7.0	9.0	29.0	41.0	61.0	14.0	19.0	0.0	0.0	0.0	0.0
OTU754070795	Bacteria; Chloroflexi; Anaerolineae; Anaerolineales; Anaerolineaceae; uncultured; uncultured bacterium	0.0	0.0	0.0	0.0	0.0	0.0	0.0	0.0	0.0	0.0	0.0	0.0	0.0	0.0	0.0	1.0	0.0	0.0	0.0	0.0	0.0	0.0	0.0	1.0	214.0	40.0	139.0	101.0
OTU725510317	Bacteria; Tenericutes; Mollicutes; Mollicutes RF9; uncultured bacterium; uncultured bacterium; uncultured bacterium	0.0	0.0	0.0	0.0	0.0	0.0	68.0	445.0	220.0	1.0	4.0	0.0	0.0	0.0	0.0	0.0	0.0	0.0	0.0	0.0	0.0	0.0	0.0	0.0	0.0	0.0	0.0	0.0
OTU737397746	Bacteria; Planctomycetes; Pla4 lineage; uncultured bacterium; uncultured bacterium; uncultured bacterium; uncultured bacterium	0.0	1.0	0.0	0.0	0.0	0.0	0.0	0.0	0.0	0.0	0.0	0.0	0.0	0.0	0.0	0.0	0.0	1.0	2.0	7.0	43.0	95.0	18.0	9.0	0.0	0.0	0.0	0.0
OTU481350894	Bacteria; Fibrobacteres; Chitinivibrionia; uncultured; uncultured bacterium; uncultured bacterium; uncultured bacterium	1.0	0.0	1.0	1.0	0.0	0.0	0.0	0.0	0.0	0.0	0.0	0.0	0.0	0.0	0.0	0.0	0.0	35.0	35.0	19.0	95.0	159.0	29.0	26.0	0.0	0.0	0.0	0.0
OTU827776247	Bacteria; Proteobacteria; Epsilonproteobacteria; Campylobacterales; Helicobacteraceae; Sulfurimonas; Ambiguous_taxa	525.0	240.0	313.0	220.0	4.0	8.0	1.0	1.0	4.0	0.0	0.0	60.0	27.0	192.0	10.0	48.0	5.0	374.0	367.0	1.0	32.0	0.0	0.0	0.0	0.0	0.0	0.0	0.0
OTU668461015	Bacteria; Proteobacteria; Deltaproteobacteria; Bdellovibrionales; Bdellovibrionaceae; Bdellovibrio; uncultured bacterium	0.0	0.0	0.0	0.0	16.0	22.0	2.0	46.0	34.0	10.0	12.0	0.0	0.0	0.0	0.0	0.0	0.0	0.0	0.0	0.0	0.0	0.0	0.0	0.0	0.0	0.0	0.0	0.0
OTU953628404	Bacteria; Acidobacteria; Subgroup 21; uncultured bacterium; uncultured bacterium; uncultured bacterium; uncultured bacterium	0.0	0.0	0.0	0.0	0.0	0.0	0.0	0.0	0.0	0.0	0.0	0.0	0.0	1.0	0.0	0.0	0.0	0.0	0.0	0.0	0.0	0.0	0.0	0.0	89.0	28.0	21.0	4.0
OTU623263282	Bacteria; Planctomycetes; Planctomycetacia; Planctomycetales; Planctomycetaceae; Planctomyces	0.0	0.0	0.0	0.0	0.0	0.0	0.0	0.0	0.0	0.0	0.0	0.0	0.0	0.0	0.0	0.0	0.0	0.0	0.0	0.0	0.0	0.0	0.0	1.0	34.0	83.0	17.0	55.0
OTU22984131	Bacteria; Bacteroidetes; Flavobacteriia; Flavobacteriales; Flavobacteriaceae; Flavobacterium; Ambiguous_taxa	7.0	4.0	3.0	0.0	757.0	860.0	1.0	0.0	3.0	4.0	9.0	710.0	326.0	56.0	0.0	1.0	0.0	2.0	1.0	8.0	2.0	9.0	10.0	5.0	0.0	0.0	0.0	0.0
OTU512615613	Bacteria; Acidobacteria; Subgroup 6; uncultured bacterium; uncultured bacterium; uncultured bacterium; uncultured bacterium	0.0	0.0	0.0	0.0	0.0	0.0	0.0	0.0	0.0	0.0	0.0	0.0	0.0	0.0	0.0	0.0	0.0	0.0	0.0	0.0	0.0	0.0	0.0	0.0	62.0	60.0	24.0	113.0
OTU91383958	Bacteria; Omnitrophica; uncultured Omnitrophica bacterium; uncultured Omnitrophica bacterium; uncultured Omnitrophica bacterium; uncultured Omnitrophica bacterium; uncultured Omnitrophica bacterium	0.0	0.0	0.0	0.0	0.0	0.0	0.0	0.0	0.0	0.0	0.0	0.0	0.0	0.0	0.0	0.0	0.0	29.0	36.0	20.0	66.0	58.0	9.0	11.0	0.0	0.0	0.0	0.0
OTU529495127	Bacteria; Firmicutes; Clostridia; Clostridiales; Ruminococcaceae; uncultured	0.0	0.0	0.0	0.0	15.0	17.0	26.0	12.0	55.0	0.0	0.0	0.0	0.0	0.0	0.0	0.0	0.0	0.0	0.0	0.0	0.0	0.0	0.0	0.0	0.0	0.0	0.0	0.0
OTU210708579	Bacteria; Bacteroidetes; Bacteroidetes BD2-2	0.0	0.0	0.0	0.0	11.0	10.0	85.0	0.0	65.0	14.0	24.0	0.0	0.0	0.0	0.0	0.0	0.0	0.0	0.0	0.0	0.0	0.0	0.0	0.0	0.0	0.0	0.0	0.0
OTU181813251	Bacteria; Cyanobacteria; ML635J-21; uncultured bacterium; uncultured bacterium; uncultured bacterium; uncultured bacterium	0.0	0.0	0.0	0.0	1.0	0.0	20.0	30.0	132.0	17.0	20.0	0.0	0.0	0.0	0.0	0.0	0.0	0.0	0.0	0.0	0.0	0.0	0.0	0.0	0.0	0.0	0.0	0.0
OTU567929928	Bacteria; Proteobacteria; Deltaproteobacteria; Desulfobacterales; Desulfobulbaceae; Desulfobulbus	0.0	0.0	0.0	0.0	1.0	1.0	16.0	181.0	36.0	0.0	1.0	0.0	0.0	0.0	0.0	0.0	0.0	0.0	0.0	0.0	0.0	0.0	0.0	0.0	0.0	0.0	0.0	0.0
OTU615632112	Bacteria; Ignavibacteriae; Ignavibacteria; Ignavibacteriales; BSV26; uncultured bacterium; uncultured bacterium	0.0	0.0	0.0	0.0	0.0	0.0	9.0	126.0	70.0	152.0	171.0	0.0	0.0	0.0	0.0	0.0	0.0	0.0	0.0	0.0	0.0	0.0	0.0	0.0	0.0	0.0	0.0	0.0
OTU388060799	Bacteria; Chloroflexi; SAR202 clade; Ambiguous_taxa; Ambiguous_taxa; Ambiguous_taxa; Ambiguous_taxa	0.0	0.0	0.0	0.0	0.0	0.0	0.0	0.0	0.0	0.0	0.0	0.0	0.0	0.0	0.0	0.0	0.0	0.0	0.0	0.0	0.0	0.0	1.0	1.0	216.0	95.0	27.0	32.0
OTU263584886	Bacteria; Chloroflexi; Anaerolineae; Anaerolineales; Anaerolineaceae; uncultured; uncultured bacterium	0.0	0.0	0.0	0.0	2.0	6.0	33.0	120.0	119.0	39.0	46.0	0.0	0.0	0.0	0.0	0.0	0.0	0.0	0.0	0.0	0.0	0.0	0.0	0.0	0.0	0.0	0.0	0.0
OTU904986286	Bacteria; Proteobacteria; Epsilonproteobacteria; Campylobacterales; Helicobacteraceae; Sulfurovum	69.0	364.0	273.0	215.0	0.0	8.0	0.0	0.0	6.0	9.0	25.0	38.0	25.0	49.0	26.0	150.0	36.0	9.0	7.0	0.0	0.0	0.0	1.0	1.0	0.0	0.0	0.0	0.0
OTU661759793	Bacteria; Proteobacteria; Alphaproteobacteria; Rhodospirillales	0.0	0.0	0.0	0.0	0.0	0.0	0.0	0.0	0.0	0.0	0.0	0.0	0.0	0.0	0.0	0.0	0.0	0.0	0.0	0.0	0.0	0.0	3.0	1.0	30.0	40.0	100.0	26.0
OTU7659691	Bacteria; Proteobacteria; Deltaproteobacteria; Myxococcales; BIrii41; uncultured bacterium; uncultured bacterium	0.0	0.0	0.0	0.0	0.0	0.0	0.0	0.0	0.0	0.0	0.0	0.0	0.0	0.0	0.0	0.0	0.0	0.0	0.0	0.0	0.0	0.0	0.0	3.0	54.0	49.0	41.0	52.0
OTU342439429	Bacteria; Proteobacteria; Alphaproteobacteria; Alphaproteobacteria Incertae Sedis; Unknown Family; uncultured; uncultured bacterium	0.0	0.0	0.0	0.0	0.0	0.0	0.0	0.0	1.0	80.0	458.0	0.0	0.0	0.0	0.0	0.0	0.0	0.0	0.0	0.0	0.0	0.0	0.0	0.0	3.0	0.0	0.0	0.0
OTU700084502	Bacteria; Verrucomicrobia; S-BQ2-57 soil group; uncultured bacterium; uncultured bacterium; uncultured bacterium; uncultured bacterium	0.0	0.0	0.0	0.0	0.0	0.0	0.0	0.0	0.0	0.0	0.0	0.0	0.0	0.0	0.0	0.0	0.0	0.0	0.0	0.0	0.0	0.0	0.0	0.0	100.0	27.0	0.0	11.0
OTU857617761	Bacteria; Bacteroidetes; Bacteroidia; Bacteroidales; Rs-E47 termite group; uncultured bacterium; uncultured bacterium	0.0	0.0	0.0	0.0	1.0	1.0	9.0	108.0	49.0	0.0	0.0	0.0	0.0	0.0	0.0	0.0	0.0	0.0	0.0	0.0	0.0	0.0	0.0	0.0	0.0	0.0	0.0	0.0
OTU845749931	Bacteria; Verrucomicrobia; Spartobacteria; Chthoniobacterales; 01D2Z36; uncultured cyanobacterium; uncultured cyanobacterium	1.0	0.0	0.0	0.0	18.0	36.0	26.0	1116.0	115.0	517.0	475.0	0.0	0.0	0.0	0.0	0.0	0.0	0.0	0.0	0.0	0.0	0.0	0.0	0.0	0.0	0.0	0.0	0.0
OTU647647082	Bacteria; Proteobacteria; Alphaproteobacteria; Alphaproteobacteria Incertae Sedis; uncultured	0.0	1.0	0.0	0.0	434.0	312.0	18.0	72.0	110.0	7.0	14.0	1.0	0.0	0.0	0.0	1.0	0.0	0.0	0.0	0.0	0.0	0.0	0.0	0.0	0.0	0.0	0.0	0.0
OTU172270738	Bacteria; Proteobacteria; Deltaproteobacteria; Desulfobacterales; Desulfobacteraceae; uncultured	0.0	8.0	6.0	5.0	0.0	0.0	0.0	0.0	0.0	0.0	0.0	0.0	0.0	0.0	0.0	0.0	0.0	56.0	53.0	5.0	14.0	17.0	23.0	8.0	0.0	0.0	0.0	0.0
OTU528391373	Bacteria; Proteobacteria; Alphaproteobacteria; Rhizobiales	0.0	0.0	0.0	0.0	0.0	0.0	0.0	0.0	0.0	0.0	0.0	0.0	0.0	0.0	0.0	0.0	0.0	0.0	0.0	0.0	0.0	0.0	4.0	1.0	1104.0	813.0	166.0	161.0
OTU830704979	Bacteria; Proteobacteria; Gammaproteobacteria; Pseudomonadales; Moraxellaceae; Perlucidibaca; Ambiguous_taxa	0.0	0.0	0.0	0.0	0.0	0.0	0.0	0.0	0.0	0.0	0.0	0.0	0.0	0.0	0.0	0.0	0.0	0.0	0.0	0.0	316.0	0.0	0.0	1.0	0.0	0.0	0.0	0.0
OTU275190484	Bacteria; Proteobacteria; Gammaproteobacteria; Xanthomonadales; uncultured; uncultured bacterium; uncultured bacterium	0.0	0.0	0.0	0.0	0.0	0.0	0.0	0.0	0.0	0.0	0.0	0.0	0.0	0.0	0.0	0.0	0.0	0.0	0.0	0.0	0.0	0.0	0.0	0.0	43.0	3.0	23.0	63.0
OTU237695453	Bacteria; Proteobacteria; Epsilonproteobacteria; Campylobacterales; Helicobacteraceae; uncultured; Ambiguous_taxa	0.0	1.0	0.0	0.0	24.0	22.0	45.0	403.0	420.0	95.0	62.0	2.0	0.0	0.0	0.0	0.0	1.0	0.0	0.0	0.0	0.0	0.0	0.0	0.0	0.0	0.0	0.0	0.0
OTU632464389	Bacteria; Proteobacteria; Alphaproteobacteria; Rickettsiales; SM2D12; uncultured bacterium; uncultured bacterium	0.0	0.0	0.0	0.0	0.0	1.0	12.0	66.0	32.0	2.0	3.0	0.0	0.0	0.0	0.0	0.0	0.0	0.0	0.0	0.0	0.0	0.0	0.0	0.0	0.0	0.0	0.0	0.0
OTU380935443	Bacteria; Verrucomicrobia; Verrucomicrobiae; Verrucomicrobiales; DEV007; uncultured organism; uncultured organism	0.0	0.0	0.0	0.0	0.0	1.0	0.0	0.0	0.0	0.0	0.0	0.0	0.0	0.0	0.0	0.0	0.0	0.0	0.0	0.0	0.0	0.0	0.0	0.0	40.0	19.0	32.0	81.0
OTU7914302	Bacteria; Saccharibacteria; uncultured bacterium; uncultured bacterium; uncultured bacterium; uncultured bacterium; uncultured bacterium	0.0	0.0	0.0	0.0	0.0	0.0	0.0	0.0	0.0	0.0	0.0	0.0	0.0	0.0	0.0	0.0	0.0	0.0	0.0	0.0	0.0	0.0	1.0	0.0	18.0	28.0	55.0	89.0
OTU230104268	Bacteria; Chloroflexi; Ardenticatenia; uncultured; Ambiguous_taxa; Ambiguous_taxa; Ambiguous_taxa	0.0	0.0	0.0	0.0	0.0	0.0	0.0	0.0	0.0	1.0	2.0	0.0	0.0	0.0	0.0	1.0	0.0	0.0	0.0	0.0	0.0	0.0	3.0	0.0	44.0	49.0	51.0	95.0
OTU576857910	Bacteria; Proteobacteria; Deltaproteobacteria; Bdellovibrionales; Bacteriovoracaceae; Peredibacter	0.0	0.0	0.0	0.0	0.0	2.0	10.0	41.0	96.0	10.0	12.0	0.0	0.0	0.0	0.0	0.0	0.0	0.0	0.0	0.0	0.0	0.0	0.0	0.0	0.0	0.0	0.0	0.0
OTU939828501	Bacteria; Lentisphaerae; Lentisphaeria; Victivallales; pLW-89; uncultured bacterium; uncultured bacterium	0.0	0.0	0.0	0.0	0.0	0.0	57.0	150.0	4.0	2.0	4.0	0.0	0.0	0.0	0.0	0.0	0.0	0.0	0.0	0.0	0.0	0.0	0.0	0.0	0.0	0.0	0.0	0.0
OTU562585132	Unassigned	0.0	0.0	1.0	0.0	8.0	8.0	4.0	20.0	25.0	24.0	59.0	0.0	0.0	0.0	0.0	0.0	0.0	0.0	0.0	0.0	0.0	0.0	0.0	0.0	0.0	0.0	0.0	0.0
OTU631375833	Bacteria; Bacteroidetes; Flavobacteriia; Flavobacteriales; Cryomorphaceae; Fluviicola; uncultured bacterium	0.0	0.0	0.0	0.0	0.0	0.0	0.0	8.0	0.0	0.0	4.0	66.0	149.0	0.0	0.0	0.0	0.0	2.0	0.0	0.0	0.0	0.0	0.0	1.0	0.0	0.0	0.0	0.0
OTU44623278	Bacteria; Proteobacteria; Alphaproteobacteria; Rickettsiales; SM2D12; uncultured bacterium; uncultured bacterium	0.0	0.0	0.0	1.0	86.0	118.0	1.0	11.0	22.0	14.0	37.0	0.0	0.0	0.0	0.0	0.0	0.0	0.0	0.0	0.0	4.0	0.0	0.0	0.0	0.0	0.0	0.0	0.0
OTU586279913	Bacteria; Spirochaetae; Spirochaetes; Spirochaetales; Leptospiraceae; uncultured	0.0	0.0	0.0	0.0	29.0	20.0	677.0	2360.0	2557.0	20.0	57.0	0.0	0.0	0.0	0.0	0.0	0.0	0.0	0.0	0.0	0.0	1.0	0.0	0.0	0.0	0.0	0.0	0.0
OTU868941827	Bacteria; Nitrospirae; Nitrospira; Nitrospirales; Nitrospiraceae; uncultured; uncultured bacterium	0.0	0.0	0.0	1.0	0.0	0.0	0.0	0.0	0.0	0.0	0.0	0.0	0.0	0.0	0.0	0.0	0.0	94.0	91.0	10.0	14.0	11.0	0.0	1.0	0.0	0.0	0.0	0.0
OTU335334804	Bacteria; Chloroflexi; Anaerolineae; Anaerolineales; Anaerolineaceae; uncultured; uncultured bacterium	0.0	0.0	0.0	0.0	2.0	3.0	14.0	25.0	155.0	5.0	3.0	0.0	0.0	0.0	0.0	0.0	0.0	0.0	0.0	0.0	0.0	0.0	0.0	0.0	0.0	0.0	0.0	0.0
OTU206743113	Bacteria; Verrucomicrobia; Verrucomicrobia Incertae Sedis; Unknown Order; Unknown Family; Candidatus Methylacidiphilum; uncultured bacterium	0.0	0.0	0.0	0.0	0.0	0.0	0.0	0.0	0.0	0.0	0.0	0.0	0.0	0.0	0.0	0.0	0.0	0.0	0.0	0.0	0.0	0.0	3.0	3.0	14.0	22.0	268.0	233.0
OTU440973404	Bacteria; Planctomycetes; Phycisphaerae; mle1-8; uncultured bacterium; uncultured bacterium; uncultured bacterium	0.0	0.0	0.0	0.0	0.0	0.0	0.0	0.0	0.0	0.0	0.0	0.0	0.0	0.0	0.0	0.0	0.0	3.0	0.0	24.0	39.0	86.0	11.0	7.0	0.0	0.0	0.0	0.0
OTU452885194	Bacteria; Proteobacteria; Deltaproteobacteria	0.0	0.0	0.0	0.0	2.0	7.0	56.0	156.0	1366.0	4.0	3.0	0.0	0.0	0.0	0.0	0.0	0.0	0.0	0.0	0.0	0.0	0.0	0.0	0.0	0.0	0.0	0.0	0.0
OTU195564920	Bacteria; Proteobacteria; Deltaproteobacteria; Oligoflexales; 0319-6G20; uncultured bacterium; uncultured bacterium	0.0	0.0	0.0	0.0	0.0	0.0	0.0	0.0	0.0	0.0	0.0	0.0	0.0	0.0	0.0	0.0	0.0	0.0	0.0	0.0	0.0	0.0	0.0	0.0	74.0	88.0	2.0	6.0
OTU111916531	Bacteria; Actinobacteria; Acidimicrobiia; Acidimicrobiales; uncultured	0.0	0.0	0.0	0.0	0.0	0.0	0.0	0.0	0.0	0.0	0.0	0.0	0.0	0.0	0.0	0.0	0.0	0.0	0.0	0.0	0.0	0.0	0.0	0.0	34.0	92.0	1.0	0.0
OTU192853939	Bacteria; Planctomycetes; BD7-11; uncultured planctomycete; uncultured planctomycete; uncultured planctomycete; uncultured planctomycete	0.0	0.0	0.0	0.0	0.0	0.0	0.0	0.0	0.0	0.0	0.0	0.0	0.0	0.0	0.0	0.0	0.0	0.0	0.0	0.0	0.0	0.0	1.0	0.0	103.0	31.0	6.0	45.0
OTU113361146	Bacteria; Planctomycetes; Phycisphaerae; mle1-8; uncultured bacterium; uncultured bacterium; uncultured bacterium	0.0	0.0	0.0	0.0	0.0	0.0	0.0	0.0	0.0	0.0	0.0	0.0	0.0	0.0	0.0	1.0	0.0	0.0	0.0	0.0	0.0	0.0	8.0	16.0	44.0	1.0	832.0	173.0
OTU63923858	Bacteria; Bacteroidetes; Sphingobacteriia; Sphingobacteriales; S15A-MN91; uncultured bacterium; uncultured bacterium	0.0	0.0	0.0	0.0	24.0	25.0	43.0	995.0	827.0	83.0	46.0	0.0	0.0	0.0	0.0	0.0	0.0	0.0	0.0	0.0	0.0	0.0	0.0	0.0	0.0	0.0	0.0	0.0
OTU541028529	Bacteria; Chlamydiae; LD1-PA32; uncultured bacterium; uncultured bacterium; uncultured bacterium; uncultured bacterium	0.0	0.0	0.0	0.0	0.0	0.0	0.0	0.0	0.0	0.0	0.0	0.0	0.0	0.0	0.0	0.0	0.0	6.0	3.0	43.0	134.0	52.0	25.0	26.0	0.0	0.0	0.0	0.0
OTU68461081	Bacteria; Planctomycetes; Phycisphaerae; Phycisphaerales; Phycisphaeraceae; SM1A02	0.0	0.0	0.0	0.0	5.0	20.0	10.0	74.0	46.0	36.0	66.0	0.0	0.0	0.0	0.0	0.0	0.0	0.0	0.0	0.0	0.0	0.0	0.0	0.0	0.0	0.0	0.0	0.0
OTU859935258	Bacteria; Proteobacteria; Deltaproteobacteria; Myxococcales; FFCH16767; uncultured bacterium; uncultured bacterium	0.0	0.0	0.0	0.0	0.0	0.0	0.0	0.0	0.0	0.0	0.0	0.0	0.0	0.0	0.0	0.0	0.0	0.0	0.0	0.0	0.0	0.0	0.0	0.0	46.0	70.0	0.0	0.0
OTU312465786	Bacteria; Cloacimonetes; SHA-4; uncultured bacterium; uncultured bacterium; uncultured bacterium; uncultured bacterium	0.0	0.0	0.0	0.0	5.0	4.0	43.0	520.0	186.0	10.0	11.0	0.0	0.0	0.0	0.0	0.0	0.0	0.0	0.0	0.0	0.0	1.0	0.0	0.0	0.0	0.0	0.0	0.0
OTU26166310	Bacteria; Bacteroidetes; Sphingobacteriia; Sphingobacteriales; Saprospiraceae; uncultured; uncultured bacterium	0.0	0.0	0.0	0.0	17.0	7.0	64.0	242.0	256.0	10.0	10.0	0.0	0.0	0.0	0.0	0.0	0.0	0.0	0.0	0.0	1.0	0.0	0.0	0.0	0.0	0.0	0.0	0.0
OTU705210434	Bacteria; Planctomycetes; OM190; uncultured bacterium; uncultured bacterium; uncultured bacterium; uncultured bacterium	0.0	0.0	0.0	0.0	0.0	0.0	0.0	0.0	0.0	0.0	0.0	0.0	0.0	0.0	0.0	0.0	0.0	0.0	0.0	0.0	0.0	0.0	0.0	1.0	225.0	28.0	54.0	152.0
OTU695351789	Bacteria; Verrucomicrobia; OPB35 soil group; uncultured bacterium; uncultured bacterium; uncultured bacterium; uncultured bacterium	0.0	0.0	0.0	0.0	0.0	0.0	0.0	0.0	0.0	0.0	0.0	0.0	0.0	0.0	0.0	0.0	0.0	0.0	0.0	0.0	0.0	0.0	0.0	0.0	91.0	18.0	0.0	6.0
OTU401868074	Bacteria; Proteobacteria; Deltaproteobacteria; Myxococcales; Phaselicystidaceae; Phaselicystis; uncultured bacterium	0.0	0.0	0.0	0.0	21.0	27.0	13.0	12.0	63.0	2.0	2.0	0.0	0.0	0.0	0.0	0.0	0.0	0.0	0.0	0.0	0.0	0.0	0.0	0.0	0.0	0.0	0.0	0.0
OTU217331198	Unassigned	0.0	0.0	0.0	0.0	0.0	0.0	0.0	0.0	0.0	0.0	0.0	0.0	0.0	0.0	0.0	0.0	0.0	0.0	0.0	0.0	0.0	0.0	3.0	0.0	6.0	1.0	54.0	73.0
OTU937055989	Bacteria; Firmicutes; Bacilli; Bacillales; Paenibacillaceae; Paenibacillus; Ambiguous_taxa	0.0	45.0	12.0	56.0	0.0	0.0	0.0	0.0	0.0	0.0	0.0	0.0	0.0	14.0	0.0	0.0	0.0	0.0	0.0	1.0	0.0	8.0	12.0	12.0	1.0	3.0	0.0	3.0
OTU827046580	Bacteria; Proteobacteria; Betaproteobacteria; Methylophilales; Methylophilaceae	0.0	0.0	0.0	0.0	0.0	1.0	46.0	36.0	32.0	10.0	8.0	0.0	0.0	0.0	0.0	0.0	0.0	0.0	0.0	0.0	0.0	0.0	0.0	0.0	0.0	0.0	0.0	0.0
OTU811526933	Bacteria; Verrucomicrobia; Spartobacteria; Chthoniobacterales; DA101 soil group; uncultured bacterium; uncultured bacterium	0.0	0.0	0.0	0.0	0.0	0.0	0.0	0.0	0.0	0.0	0.0	0.0	0.0	0.0	0.0	0.0	0.0	0.0	0.0	0.0	0.0	0.0	0.0	0.0	91.0	75.0	60.0	112.0
OTU571178206	Bacteria; Proteobacteria; Alphaproteobacteria; Parvularculales; Parvularculaceae; Amphiplicatus; uncultured bacterium	0.0	0.0	0.0	0.0	0.0	0.0	0.0	0.0	0.0	1.0	0.0	0.0	0.0	0.0	0.0	1.0	0.0	0.0	0.0	0.0	0.0	0.0	3.0	1.0	107.0	62.0	208.0	210.0
OTU190615886	Bacteria; Proteobacteria; Deltaproteobacteria; Desulfurellales; Desulfurellaceae; H16; uncultured bacterium	0.0	0.0	0.0	0.0	0.0	0.0	0.0	0.0	0.0	0.0	0.0	0.0	0.0	1.0	0.0	9.0	0.0	0.0	0.0	0.0	0.0	0.0	1.0	0.0	58.0	125.0	133.0	165.0
OTU505405482	Bacteria; Chloroflexi; Anaerolineae; Anaerolineales; Anaerolineaceae; uncultured; uncultured Chloroflexi bacterium	0.0	0.0	0.0	0.0	0.0	0.0	0.0	0.0	0.0	0.0	0.0	0.0	0.0	0.0	0.0	0.0	0.0	34.0	47.0	77.0	186.0	479.0	234.0	211.0	0.0	0.0	0.0	0.0
OTU384497822	Bacteria; Proteobacteria; Alphaproteobacteria; Rhodospirillales; Rhodospirillaceae; uncultured	0.0	0.0	0.0	1.0	0.0	0.0	0.0	0.0	0.0	1.0	0.0	0.0	0.0	0.0	0.0	0.0	0.0	0.0	0.0	0.0	0.0	0.0	1.0	2.0	17.0	8.0	79.0	59.0
OTU445701088	Bacteria; Proteobacteria; Deltaproteobacteria; Desulfurellales; Desulfurellaceae; G55; uncultured bacterium	0.0	0.0	0.0	0.0	0.0	0.0	0.0	0.0	0.0	0.0	0.0	0.0	0.0	0.0	0.0	2.0	0.0	0.0	0.0	0.0	0.0	0.0	2.0	6.0	194.0	59.0	189.0	158.0
OTU177418867	Bacteria; Bacteroidetes; Sphingobacteriia; Sphingobacteriales; KD3-93; uncultured bacterium; uncultured bacterium	0.0	0.0	0.0	0.0	0.0	0.0	0.0	0.0	0.0	0.0	0.0	0.0	0.0	0.0	0.0	0.0	0.0	0.0	0.0	0.0	0.0	0.0	0.0	0.0	248.0	1.0	0.0	0.0
OTU831449276	Bacteria; Proteobacteria; Gammaproteobacteria; Acidiferrobacterales; Acidiferrobacteraceae; Sulfurifustis; Ambiguous_taxa	2.0	18.0	5.0	30.0	0.0	0.0	0.0	2.0	1.0	0.0	1.0	0.0	0.0	10.0	1.0	69.0	1.0	0.0	2.0	1.0	1.0	1.0	2.0	2.0	23.0	16.0	57.0	73.0
OTU283209191	Unassigned	0.0	0.0	0.0	0.0	0.0	2.0	42.0	157.0	122.0	2.0	9.0	0.0	0.0	0.0	0.0	0.0	0.0	0.0	0.0	0.0	0.0	0.0	0.0	0.0	0.0	0.0	0.0	0.0
OTU857491783	Bacteria; Bacteroidetes; SB-5; uncultured bacterium; uncultured bacterium; uncultured bacterium; uncultured bacterium	0.0	0.0	0.0	0.0	4.0	3.0	0.0	175.0	1.0	1.0	1.0	0.0	0.0	0.0	0.0	0.0	0.0	0.0	0.0	0.0	0.0	0.0	0.0	0.0	0.0	0.0	0.0	0.0
OTU424548796	Bacteria; Acidobacteria; Subgroup 5	0.0	0.0	0.0	0.0	0.0	0.0	0.0	0.0	0.0	0.0	0.0	0.0	0.0	0.0	0.0	0.0	0.0	0.0	0.0	0.0	0.0	0.0	1.0	2.0	81.0	31.0	53.0	117.0
OTU758118838	Bacteria; Bacteroidetes; Sphingobacteriia; Sphingobacteriales; Lentimicrobiaceae	0.0	0.0	0.0	0.0	2.0	7.0	157.0	560.0	1342.0	49.0	34.0	0.0	0.0	0.0	0.0	0.0	0.0	3.0	1.0	0.0	2.0	0.0	1.0	0.0	0.0	0.0	0.0	0.0
OTU358594163	Bacteria; Chloroflexi; Anaerolineae; Anaerolineales; Anaerolineaceae; uncultured; uncultured bacterium	0.0	0.0	0.0	0.0	0.0	0.0	0.0	0.0	0.0	0.0	0.0	0.0	0.0	0.0	0.0	0.0	0.0	0.0	0.0	0.0	0.0	0.0	0.0	0.0	294.0	38.0	4.0	6.0
OTU807135158	Bacteria; Proteobacteria; Deltaproteobacteria; Desulfuromonadales; Geobacteraceae; Geobacter; uncultured bacterium	0.0	0.0	0.0	0.0	23.0	32.0	13.0	128.0	72.0	139.0	175.0	0.0	0.0	0.0	0.0	0.0	0.0	0.0	0.0	0.0	0.0	0.0	0.0	0.0	0.0	0.0	0.0	0.0
OTU387826707	Bacteria; Acidobacteria; Subgroup 6; uncultured bacterium; uncultured bacterium; uncultured bacterium; uncultured bacterium	0.0	0.0	0.0	0.0	0.0	0.0	0.0	0.0	0.0	0.0	0.0	0.0	0.0	0.0	0.0	0.0	0.0	0.0	0.0	0.0	0.0	0.0	0.0	0.0	122.0	14.0	24.0	55.0
OTU589199818	Bacteria; Proteobacteria; Alphaproteobacteria; Sphingomonadales; Sphingomonadaceae; Sphingopyxis	1.0	1.0	1.0	0.0	1.0	20.0	156.0	196.0	276.0	12.0	14.0	0.0	0.0	0.0	0.0	0.0	0.0	0.0	0.0	0.0	3.0	0.0	0.0	0.0	0.0	0.0	0.0	0.0
OTU510878662	Bacteria; Chloroflexi; Anaerolineae; Anaerolineales; Anaerolineaceae; uncultured; uncultured bacterium	0.0	0.0	0.0	0.0	0.0	1.0	176.0	263.0	646.0	50.0	115.0	0.0	0.0	0.0	0.0	0.0	0.0	0.0	0.0	0.0	0.0	0.0	0.0	0.0	0.0	0.0	0.0	0.0
OTU784377666	Bacteria; Chloroflexi; SBR2076; uncultured bacterium; uncultured bacterium; uncultured bacterium; uncultured bacterium	0.0	0.0	0.0	0.0	0.0	0.0	0.0	0.0	0.0	0.0	0.0	0.0	0.0	0.0	0.0	0.0	0.0	0.0	0.0	12.0	19.0	307.0	22.0	41.0	0.0	0.0	0.0	0.0
OTU347658552	Bacteria; Ignavibacteriae; Ignavibacteria; Ignavibacteriales; Ignavibacteriaceae; Ignavibacterium; uncultured bacterium	0.0	0.0	0.0	0.0	1.0	6.0	21.0	161.0	76.0	6.0	6.0	0.0	0.0	0.0	0.0	0.0	0.0	0.0	0.0	0.0	0.0	0.0	0.0	0.0	0.0	0.0	0.0	0.0
OTU613182407	Bacteria; Chlorobi; Chlorobia; Chlorobiales; OPB56; uncultured bacterium; uncultured bacterium	0.0	0.0	0.0	0.0	5.0	5.0	14.0	18.0	110.0	26.0	29.0	0.0	0.0	0.0	0.0	0.0	0.0	0.0	0.0	0.0	0.0	0.0	0.0	0.0	0.0	0.0	0.0	0.0
OTU656833047	Bacteria; Chloroflexi; Anaerolineae; Anaerolineales; Anaerolineaceae; uncultured	1.0	4.0	5.0	0.0	0.0	0.0	0.0	0.0	0.0	0.0	0.0	0.0	0.0	0.0	0.0	0.0	1.0	26.0	26.0	0.0	3.0	16.0	20.0	8.0	0.0	0.0	0.0	0.0
OTU801866366	Bacteria; Planctomycetes; Planctomycetacia; Planctomycetales; Planctomycetaceae; uncultured; uncultured bacterium	0.0	0.0	0.0	2.0	0.0	0.0	0.0	0.0	0.0	0.0	0.0	0.0	0.0	0.0	0.0	1.0	0.0	8.0	4.0	6.0	37.0	63.0	21.0	12.0	0.0	0.0	0.0	0.0
OTU2593386	Bacteria; Acidobacteria; Subgroup 2; uncultured bacterium; uncultured bacterium; uncultured bacterium; uncultured bacterium	0.0	0.0	0.0	1.0	0.0	0.0	0.0	0.0	0.0	0.0	0.0	0.0	0.0	0.0	0.0	2.0	0.0	0.0	0.0	0.0	0.0	0.0	2.0	4.0	463.0	1.0	77.0	28.0
OTU799137553	Bacteria; WS2; uncultured organism; uncultured organism; uncultured organism; uncultured organism; uncultured organism	0.0	0.0	0.0	0.0	0.0	3.0	22.0	87.0	66.0	12.0	33.0	0.0	0.0	0.0	0.0	0.0	0.0	0.0	0.0	0.0	0.0	0.0	0.0	0.0	0.0	0.0	0.0	0.0
OTU572201057	Unassigned	0.0	0.0	0.0	0.0	0.0	2.0	11.0	371.0	263.0	1.0	3.0	0.0	0.0	0.0	0.0	0.0	0.0	0.0	0.0	0.0	0.0	0.0	0.0	0.0	0.0	0.0	0.0	0.0
OTU196877876	Bacteria; Planctomycetes; Phycisphaerae; mle1-8; uncultured bacterium; uncultured bacterium; uncultured bacterium	0.0	0.0	0.0	0.0	0.0	0.0	0.0	0.0	0.0	0.0	0.0	0.0	0.0	0.0	0.0	0.0	0.0	0.0	0.0	0.0	0.0	0.0	0.0	0.0	127.0	2.0	0.0	21.0
OTU730537943	Unassigned	0.0	0.0	0.0	0.0	84.0	85.0	1.0	28.0	6.0	0.0	1.0	0.0	0.0	0.0	0.0	0.0	0.0	0.0	0.0	0.0	0.0	0.0	0.0	0.0	0.0	0.0	0.0	0.0
OTU577754797	Bacteria; Proteobacteria; Alphaproteobacteria; Rickettsiales; SM2D12; uncultured bacterium; uncultured bacterium	0.0	0.0	0.0	0.0	0.0	0.0	27.0	149.0	76.0	15.0	57.0	0.0	0.0	0.0	0.0	0.0	0.0	0.0	0.0	0.0	0.0	0.0	0.0	0.0	12.0	12.0	32.0	87.0
OTU61601884	Bacteria; Chloroflexi; JG30-KF-CM66; uncultured bacterium; uncultured bacterium; uncultured bacterium; uncultured bacterium	2.0	0.0	0.0	1.0	0.0	0.0	0.0	0.0	0.0	0.0	0.0	0.0	0.0	0.0	0.0	7.0	0.0	0.0	0.0	0.0	0.0	0.0	1.0	0.0	102.0	104.0	12.0	31.0
OTU876934900	Bacteria; Deferribacteres; Deferribacteres Incertae Sedis; Unknown Order; Unknown Family; Caldithrix	0.0	1.0	0.0	1.0	0.0	0.0	0.0	0.0	0.0	0.0	0.0	0.0	0.0	0.0	0.0	0.0	0.0	51.0	70.0	12.0	7.0	9.0	16.0	25.0	0.0	0.0	0.0	0.0
OTU406059164	Bacteria; SR1 (Absconditabacteria); uncultured candidate division SR1 bacterium; uncultured candidate division SR1 bacterium; uncultured candidate division SR1 bacterium; uncultured candidate division SR1 bacterium; uncultured candidate division SR1 bacterium	0.0	0.0	0.0	0.0	0.0	0.0	9.0	88.0	41.0	0.0	0.0	0.0	0.0	0.0	0.0	0.0	0.0	0.0	0.0	0.0	0.0	0.0	0.0	0.0	0.0	0.0	0.0	0.0
OTU105900219	Bacteria; Proteobacteria; Deltaproteobacteria; Myxococcales; uncultured; uncultured bacterium; uncultured bacterium	0.0	0.0	0.0	0.0	0.0	0.0	0.0	0.0	0.0	0.0	0.0	0.0	0.0	0.0	0.0	0.0	0.0	0.0	0.0	0.0	0.0	0.0	1.0	0.0	72.0	43.0	3.0	4.0
OTU588377409	Bacteria; Planctomycetes; Pla3 lineage	0.0	0.0	0.0	0.0	0.0	0.0	0.0	0.0	0.0	0.0	0.0	0.0	0.0	0.0	0.0	0.0	0.0	1.0	5.0	8.0	64.0	54.0	19.0	17.0	0.0	0.0	0.0	0.0
OTU553875866	Unassigned	0.0	0.0	1.0	0.0	1.0	1.0	17.0	45.0	51.0	4.0	1.0	0.0	0.0	0.0	0.0	1.0	0.0	0.0	0.0	0.0	0.0	0.0	0.0	0.0	0.0	0.0	0.0	0.0
OTU988567988	Bacteria; Acidobacteria; Acidobacteria; Acidobacteriales; Acidobacteriaceae (Subgroup 1); uncultured	0.0	0.0	0.0	0.0	0.0	0.0	0.0	0.0	0.0	0.0	0.0	0.0	0.0	0.0	0.0	0.0	0.0	0.0	0.0	0.0	0.0	0.0	0.0	0.0	22.0	6.0	6.0	108.0
OTU871347940	Unassigned	0.0	1.0	0.0	0.0	0.0	0.0	0.0	0.0	0.0	0.0	0.0	0.0	0.0	0.0	0.0	0.0	0.0	3.0	0.0	7.0	21.0	85.0	12.0	6.0	0.0	0.0	0.0	0.0
OTU837634890	Bacteria; Proteobacteria; Deltaproteobacteria; Syntrophobacterales; Syntrophaceae; uncultured; uncultured bacterium	0.0	0.0	0.0	0.0	0.0	0.0	0.0	0.0	0.0	0.0	0.0	0.0	0.0	0.0	0.0	0.0	0.0	27.0	25.0	11.0	76.0	54.0	8.0	5.0	0.0	0.0	0.0	0.0
OTU711782251	Bacteria; Bacteroidetes; Flavobacteriia; Flavobacteriales; NS9 marine group; uncultured Bacteroidetes bacterium; uncultured Bacteroidetes bacterium	0.0	0.0	0.0	0.0	112.0	184.0	12.0	240.0	220.0	21.0	141.0	0.0	0.0	0.0	0.0	0.0	0.0	0.0	0.0	0.0	0.0	0.0	0.0	0.0	0.0	0.0	0.0	0.0
OTU772177778	Bacteria; Bacteroidetes; Bacteroidetes vadinHA17	0.0	0.0	0.0	0.0	2.0	2.0	3.0	492.0	39.0	137.0	201.0	0.0	0.0	0.0	0.0	0.0	0.0	0.0	0.0	0.0	0.0	0.0	0.0	0.0	0.0	0.0	0.0	0.0
OTU841077094	Bacteria; Acidobacteria; Solibacteres; Solibacterales; Solibacteraceae (Subgroup 3); Bryobacter	0.0	0.0	0.0	0.0	27.0	31.0	31.0	87.0	61.0	51.0	57.0	0.0	0.0	0.0	0.0	0.0	0.0	0.0	0.0	0.0	0.0	0.0	0.0	0.0	0.0	0.0	6.0	1.0
OTU293288917	Unassigned	0.0	0.0	0.0	0.0	0.0	0.0	201.0	543.0	446.0	554.0	655.0	0.0	0.0	1.0	0.0	0.0	0.0	0.0	0.0	0.0	0.0	0.0	0.0	0.0	0.0	0.0	0.0	0.0
OTU776329090	Bacteria; Latescibacteria; uncultured bacterium; uncultured bacterium; uncultured bacterium; uncultured bacterium; uncultured bacterium	0.0	0.0	0.0	0.0	0.0	0.0	0.0	0.0	0.0	0.0	0.0	0.0	0.0	0.0	0.0	0.0	0.0	0.0	0.0	0.0	0.0	0.0	0.0	0.0	392.0	256.0	1.0	5.0
OTU177350182	Archaea; Euryarchaeota; Methanomicrobia; ANME-1; ANME-1a; uncultured archaeon; uncultured archaeon	0.0	0.0	0.0	0.0	0.0	0.0	0.0	0.0	0.0	0.0	0.0	0.0	0.0	0.0	0.0	0.0	0.0	2.0	2.0	3.0	10.0	169.0	2.0	2.0	0.0	0.0	0.0	0.0
OTU932180192	Unassigned	0.0	3.0	2.0	1.0	0.0	0.0	0.0	0.0	0.0	0.0	0.0	0.0	0.0	1.0	0.0	1.0	1.0	47.0	46.0	37.0	97.0	89.0	15.0	13.0	0.0	0.0	0.0	0.0
OTU736284902	Bacteria; Planctomycetes; Pla4 lineage; uncultured bacterium; uncultured bacterium; uncultured bacterium; uncultured bacterium	0.0	0.0	0.0	0.0	0.0	0.0	0.0	0.0	0.0	0.0	0.0	0.0	0.0	0.0	0.0	1.0	0.0	0.0	0.0	0.0	0.0	0.0	0.0	1.0	8.0	5.0	25.0	74.0
OTU639266349	Bacteria; Cloacimonetes; PBS-18	0.0	0.0	0.0	0.0	1.0	1.0	3.0	980.0	65.0	56.0	51.0	0.0	0.0	0.0	0.0	0.0	0.0	0.0	0.0	0.0	0.0	0.0	0.0	0.0	0.0	0.0	0.0	0.0
OTU247260021	Bacteria; Parcubacteria; uncultured bacterium; uncultured bacterium; uncultured bacterium; uncultured bacterium; uncultured bacterium	0.0	0.0	1.0	0.0	1.0	0.0	0.0	1.0	0.0	190.0	159.0	0.0	0.0	0.0	0.0	0.0	0.0	0.0	0.0	0.0	0.0	0.0	0.0	0.0	0.0	0.0	0.0	0.0
OTU669060570	Bacteria; Proteobacteria; Betaproteobacteria; B1-7BS; Ambiguous_taxa; Ambiguous_taxa; Ambiguous_taxa	0.0	0.0	0.0	0.0	0.0	0.0	0.0	0.0	0.0	0.0	0.0	0.0	0.0	0.0	0.0	2.0	0.0	0.0	0.0	0.0	0.0	0.0	0.0	3.0	34.0	158.0	24.0	35.0
OTU689787632	Bacteria; Verrucomicrobia; OPB35 soil group; uncultured bacterium; uncultured bacterium; uncultured bacterium; uncultured bacterium	0.0	0.0	0.0	0.0	148.0	109.0	83.0	117.0	182.0	10.0	9.0	0.0	0.0	0.0	0.0	0.0	0.0	0.0	0.0	0.0	0.0	0.0	0.0	0.0	0.0	0.0	0.0	0.0
OTU189799642	Bacteria; Proteobacteria; Alphaproteobacteria; Caulobacterales; Hyphomonadaceae; Woodsholea; uncultured bacterium	0.0	0.0	0.0	0.0	0.0	0.0	0.0	0.0	0.0	0.0	0.0	0.0	0.0	0.0	0.0	1.0	0.0	0.0	0.0	0.0	0.0	0.0	1.0	2.0	2605.0	1868.0	241.0	518.0
OTU608844727	Bacteria; Proteobacteria; Alphaproteobacteria; Parvularculales; Parvularculaceae; Amphiplicatus; uncultured bacterium	0.0	1.0	0.0	2.0	0.0	0.0	0.0	0.0	0.0	0.0	0.0	0.0	0.0	0.0	0.0	2.0	0.0	0.0	0.0	0.0	0.0	0.0	31.0	23.0	745.0	338.0	1723.0	302.0
OTU879401478	Bacteria; Proteobacteria; Alphaproteobacteria; Rhodospirillales; Rhodospirillales Incertae Sedis; Reyranella; uncultured bacterium	0.0	0.0	0.0	2.0	0.0	0.0	0.0	0.0	6.0	0.0	0.0	0.0	1.0	1.0	0.0	0.0	0.0	0.0	0.0	0.0	0.0	0.0	1.0	0.0	184.0	79.0	83.0	57.0
OTU218044039	Bacteria; BRC1; uncultured bacterium; uncultured bacterium; uncultured bacterium; uncultured bacterium; uncultured bacterium	0.0	0.0	0.0	0.0	0.0	0.0	0.0	0.0	1.0	67.0	51.0	0.0	0.0	0.0	0.0	0.0	0.0	0.0	0.0	0.0	0.0	0.0	0.0	0.0	0.0	0.0	0.0	0.0
OTU911779295	Bacteria; Parcubacteria; uncultured bacterium; uncultured bacterium; uncultured bacterium; uncultured bacterium; uncultured bacterium	0.0	0.0	0.0	0.0	0.0	0.0	23.0	56.0	36.0	4.0	9.0	0.0	0.0	0.0	0.0	0.0	0.0	0.0	0.0	0.0	0.0	0.0	0.0	0.0	0.0	0.0	0.0	0.0
OTU845717920	Bacteria; Proteobacteria; Deltaproteobacteria; Myxococcales; Phaselicystidaceae; Phaselicystis; uncultured bacterium	0.0	0.0	0.0	0.0	0.0	0.0	2.0	0.0	0.0	38.0	73.0	0.0	0.0	0.0	0.0	0.0	0.0	0.0	0.0	0.0	0.0	0.0	0.0	0.0	0.0	0.0	0.0	0.0
OTU848525756	Bacteria; Proteobacteria; Betaproteobacteria; Burkholderiales; Comamonadaceae	0.0	24.0	3.0	2.0	6.0	6.0	0.0	1.0	0.0	0.0	2.0	0.0	0.0	1.0	0.0	0.0	0.0	0.0	0.0	0.0	477.0	0.0	8.0	4.0	1.0	0.0	0.0	0.0
OTU603502701	Bacteria; Proteobacteria; Deltaproteobacteria; Desulfarculales; Desulfarculaceae; uncultured; uncultured bacterium	4.0	35.0	26.0	38.0	0.0	1.0	0.0	0.0	0.0	0.0	1.0	0.0	0.0	0.0	0.0	0.0	0.0	3.0	4.0	0.0	0.0	0.0	0.0	0.0	0.0	0.0	0.0	0.0
OTU138592628	Bacteria; Proteobacteria; Deltaproteobacteria; Desulfurellales; Desulfurellaceae; H16	0.0	0.0	0.0	0.0	0.0	0.0	0.0	0.0	0.0	0.0	0.0	0.0	0.0	0.0	0.0	5.0	0.0	0.0	0.0	0.0	0.0	0.0	3.0	3.0	151.0	270.0	192.0	162.0
OTU775356061	Bacteria; Proteobacteria; Alphaproteobacteria; Rhodospirillales; B79; Ambiguous_taxa; Ambiguous_taxa	0.0	0.0	0.0	0.0	0.0	1.0	9.0	3.0	8.0	4.0	3.0	0.0	0.0	0.0	0.0	0.0	0.0	0.0	0.0	0.0	0.0	0.0	1.0	0.0	20.0	8.0	49.0	261.0
OTU814187640	Bacteria; Proteobacteria; Deltaproteobacteria; NB1-j	0.0	0.0	0.0	0.0	0.0	0.0	0.0	0.0	0.0	0.0	0.0	0.0	0.0	0.0	0.0	1.0	0.0	0.0	0.0	0.0	0.0	0.0	0.0	0.0	38.0	75.0	31.0	5.0
OTU796307040	Bacteria; Gemmatimonadetes; S0134 terrestrial group; uncultured bacterium; uncultured bacterium; uncultured bacterium; uncultured bacterium	0.0	1.0	0.0	0.0	0.0	0.0	0.0	0.0	0.0	0.0	0.0	0.0	0.0	0.0	0.0	2.0	1.0	0.0	0.0	0.0	0.0	0.0	0.0	0.0	322.0	35.0	0.0	59.0
OTU637103567	Bacteria; Fibrobacteres; Chitinivibrionia; uncultured; uncultured bacterium; uncultured bacterium; uncultured bacterium	0.0	0.0	0.0	0.0	0.0	0.0	0.0	0.0	0.0	0.0	0.0	0.0	0.0	0.0	0.0	0.0	0.0	13.0	22.0	7.0	42.0	29.0	20.0	6.0	0.0	0.0	0.0	0.0
OTU602773878	Bacteria; Cyanobacteria; Melainabacteria; Obscuribacterales; uncultured bacterium; uncultured bacterium; uncultured bacterium	0.0	0.0	0.0	0.0	0.0	0.0	0.0	0.0	0.0	0.0	0.0	0.0	0.0	0.0	0.0	0.0	0.0	0.0	0.0	0.0	0.0	0.0	0.0	0.0	152.0	239.0	6.0	29.0
OTU896453060	Bacteria; Cyanobacteria; Melainabacteria; Obscuribacterales; uncultured bacterium; uncultured bacterium; uncultured bacterium	0.0	0.0	0.0	0.0	0.0	0.0	0.0	0.0	0.0	0.0	0.0	0.0	0.0	0.0	0.0	0.0	0.0	0.0	0.0	0.0	0.0	0.0	5.0	9.0	229.0	51.0	335.0	266.0
OTU990340452	Bacteria; Proteobacteria; Alphaproteobacteria; Caulobacterales; Hyphomonadaceae; Woodsholea; uncultured bacterium	0.0	0.0	0.0	0.0	0.0	0.0	0.0	0.0	0.0	0.0	0.0	0.0	0.0	0.0	0.0	0.0	0.0	0.0	0.0	0.0	0.0	0.0	0.0	0.0	260.0	301.0	4.0	0.0
OTU245507191	Bacteria; Firmicutes; Erysipelotrichia; Erysipelotrichales; Erysipelotrichaceae; Erysipelothrix; uncultured bacterium	1.0	1.0	0.0	0.0	0.0	0.0	2.0	507.0	4.0	0.0	0.0	0.0	7.0	0.0	0.0	0.0	0.0	0.0	0.0	0.0	0.0	0.0	0.0	0.0	0.0	0.0	0.0	0.0
OTU42033165	Bacteria; Tenericutes; Mollicutes; Mollicutes RF9; uncultured bacterium; uncultured bacterium; uncultured bacterium	0.0	0.0	0.0	0.0	1.0	0.0	44.0	444.0	125.0	1.0	2.0	0.0	0.0	0.0	0.0	0.0	0.0	0.0	0.0	0.0	0.0	0.0	0.0	0.0	0.0	0.0	0.0	0.0
OTU935369868	Bacteria; Planctomycetes; Planctomycetacia; Planctomycetales; Planctomycetaceae; uncultured; uncultured bacterium	0.0	0.0	0.0	0.0	0.0	0.0	0.0	0.0	0.0	0.0	0.0	0.0	0.0	0.0	0.0	0.0	0.0	0.0	0.0	0.0	0.0	0.0	4.0	4.0	82.0	90.0	176.0	102.0
OTU707676395	Archaea; Woesearchaeota (DHVEG-6)	0.0	0.0	0.0	0.0	0.0	2.0	11.0	42.0	116.0	12.0	20.0	0.0	0.0	0.0	0.0	0.0	0.0	0.0	0.0	0.0	0.0	0.0	0.0	0.0	0.0	0.0	0.0	0.0
OTU235223656	Bacteria; Proteobacteria; Alphaproteobacteria; Rhizobiales; Hyphomicrobiaceae; Hyphomicrobium; Ambiguous_taxa	2.0	0.0	0.0	4.0	22.0	33.0	18.0	192.0	121.0	139.0	285.0	0.0	0.0	0.0	0.0	7.0	0.0	0.0	0.0	0.0	0.0	0.0	6.0	5.0	516.0	632.0	290.0	304.0
OTU800392179	Bacteria; Proteobacteria; Deltaproteobacteria; Myxococcales; Haliangiaceae; Haliangium; uncultured bacterium	0.0	0.0	0.0	0.0	0.0	0.0	0.0	0.0	0.0	0.0	0.0	0.0	0.0	0.0	0.0	0.0	0.0	0.0	0.0	0.0	0.0	0.0	0.0	1.0	59.0	160.0	34.0	76.0
OTU718881622	Unassigned	0.0	0.0	0.0	0.0	328.0	336.0	7.0	13.0	20.0	4.0	10.0	0.0	0.0	0.0	0.0	0.0	0.0	0.0	0.0	0.0	0.0	0.0	0.0	0.0	0.0	0.0	0.0	0.0
OTU597541890	Bacteria; Proteobacteria; Deltaproteobacteria; Myxococcales; Phaselicystidaceae; Phaselicystis; uncultured bacterium	0.0	0.0	0.0	0.0	2.0	1.0	5.0	8.0	8.0	41.0	64.0	0.0	0.0	0.0	0.0	0.0	0.0	0.0	0.0	0.0	0.0	0.0	0.0	0.0	0.0	0.0	0.0	0.0
OTU164724741	Bacteria; Cloacimonetes; uncultured bacterium; uncultured bacterium; uncultured bacterium; uncultured bacterium; uncultured bacterium	0.0	0.0	0.0	0.0	0.0	1.0	29.0	825.0	359.0	7.0	13.0	0.0	0.0	0.0	0.0	0.0	0.0	0.0	0.0	0.0	0.0	0.0	0.0	0.0	0.0	0.0	0.0	0.0
OTU889057444	Bacteria; Verrucomicrobia; Spartobacteria; Chthoniobacterales; Chthoniobacterales Incertae Sedis; Terrimicrobium; uncultured bacterium	0.0	0.0	0.0	0.0	3.0	2.0	63.0	2793.0	919.0	7.0	32.0	0.0	0.0	0.0	0.0	0.0	0.0	0.0	0.0	0.0	0.0	0.0	0.0	2.0	60.0	18.0	7.0	22.0
OTU757536036	Bacteria; Bacteroidetes; Sphingobacteriia; Sphingobacteriales; uncultured; uncultured bacterium; uncultured bacterium	0.0	0.0	0.0	0.0	0.0	0.0	0.0	0.0	0.0	0.0	0.0	0.0	0.0	0.0	0.0	0.0	1.0	0.0	0.0	0.0	0.0	0.0	15.0	10.0	75.0	114.0	905.0	126.0
OTU422837817	Bacteria; Bacteroidetes; Sphingobacteriia; Sphingobacteriales; Sphingobacteriaceae; Solitalea; Ambiguous_taxa	0.0	0.0	0.0	0.0	0.0	0.0	0.0	0.0	0.0	0.0	0.0	0.0	0.0	0.0	0.0	0.0	0.0	0.0	0.0	0.0	360.0	7.0	9.0	2.0	14.0	79.0	0.0	4.0
OTU541681257	Bacteria; Bacteroidetes; Sphingobacteriia; Sphingobacteriales; Lentimicrobiaceae	0.0	0.0	0.0	0.0	8.0	13.0	107.0	669.0	1055.0	5.0	13.0	0.0	1.0	0.0	0.0	0.0	0.0	0.0	0.0	0.0	0.0	0.0	0.0	0.0	0.0	0.0	0.0	0.0
OTU783635431	Bacteria; Proteobacteria; Betaproteobacteria; Nitrosomonadales; Nitrosomonadaceae; uncultured	0.0	0.0	0.0	0.0	0.0	0.0	0.0	0.0	0.0	0.0	0.0	0.0	0.0	0.0	0.0	0.0	0.0	0.0	0.0	0.0	0.0	0.0	1.0	1.0	24.0	7.0	112.0	169.0
OTU67782250	Bacteria; Chloroflexi; Anaerolineae; Anaerolineales; Anaerolineaceae; uncultured	0.0	0.0	0.0	0.0	0.0	0.0	0.0	0.0	0.0	0.0	0.0	0.0	0.0	0.0	0.0	0.0	0.0	23.0	19.0	5.0	36.0	56.0	22.0	20.0	0.0	0.0	0.0	0.0
OTU568608126	Bacteria; Chloroflexi; Anaerolineae; Anaerolineales; Anaerolineaceae; uncultured; uncultured bacterium	0.0	0.0	0.0	0.0	0.0	0.0	0.0	0.0	0.0	0.0	0.0	0.0	0.0	0.0	0.0	0.0	0.0	0.0	0.0	0.0	0.0	0.0	0.0	0.0	267.0	8.0	0.0	0.0
OTU534209042	Bacteria; Spirochaetae; Spirochaetes; Spirochaetales; Spirochaetaceae; Treponema	0.0	0.0	0.0	0.0	26.0	28.0	103.0	620.0	315.0	1.0	6.0	0.0	0.0	0.0	0.0	0.0	0.0	0.0	0.0	0.0	2.0	0.0	0.0	0.0	0.0	0.0	0.0	0.0
OTU763408248	Bacteria; Proteobacteria; Gammaproteobacteria; Pseudomonadales; Pseudomonadaceae; Pseudomonas	0.0	0.0	0.0	0.0	0.0	0.0	0.0	0.0	0.0	0.0	0.0	0.0	0.0	0.0	130.0	73.0	47.0	0.0	0.0	0.0	0.0	0.0	0.0	0.0	0.0	0.0	0.0	0.0
OTU299777875	Bacteria; Gemmatimonadetes; S0134 terrestrial group; uncultured bacterium; uncultured bacterium; uncultured bacterium; uncultured bacterium	0.0	0.0	0.0	0.0	0.0	0.0	0.0	0.0	0.0	0.0	0.0	0.0	0.0	0.0	0.0	0.0	0.0	0.0	0.0	0.0	0.0	0.0	0.0	0.0	122.0	2.0	1.0	2.0
OTU292255317	Bacteria; Planctomycetes; Phycisphaerae; Phycisphaerales; Phycisphaeraceae; SM1A02	0.0	0.0	0.0	0.0	35.0	56.0	50.0	59.0	45.0	20.0	37.0	0.0	0.0	0.0	0.0	0.0	0.0	0.0	0.0	0.0	0.0	0.0	0.0	0.0	0.0	0.0	0.0	0.0
OTU523177724	Bacteria; Proteobacteria; Alphaproteobacteria; Rhizobiales; Hyphomicrobiaceae; Pedomicrobium	0.0	0.0	0.0	0.0	0.0	0.0	0.0	0.0	0.0	0.0	0.0	0.0	0.0	0.0	0.0	1.0	0.0	0.0	0.0	0.0	0.0	1.0	1.0	1.0	227.0	156.0	20.0	16.0
OTU968312333	Bacteria; Proteobacteria; Betaproteobacteria; Burkholderiales; Comamonadaceae; Ambiguous_taxa; Ambiguous_taxa	13.0	7.0	6.0	3.0	965.0	1061.0	499.0	2415.0	3141.0	222.0	285.0	3.0	3.0	23.0	0.0	2.0	0.0	0.0	0.0	0.0	82.0	4.0	0.0	0.0	0.0	0.0	0.0	0.0
OTU836213662	Bacteria; Proteobacteria; Betaproteobacteria; Hydrogenophilales; Hydrogenophilaceae; uncultured; Ambiguous_taxa	9.0	2.0	0.0	0.0	21.0	23.0	85.0	351.0	39.0	341.0	170.0	0.0	1.0	2.0	0.0	0.0	0.0	0.0	0.0	0.0	65.0	0.0	0.0	1.0	0.0	0.0	0.0	0.0
OTU531283781	Bacteria; Proteobacteria; Alphaproteobacteria; Caulobacterales; Hyphomonadaceae; uncultured; uncultured bacterium	1.0	0.0	0.0	0.0	25.0	25.0	13.0	20.0	19.0	5.0	4.0	65.0	2.0	0.0	0.0	0.0	0.0	0.0	2.0	0.0	2.0	0.0	1.0	0.0	0.0	0.0	0.0	0.0
OTU930014091	Unassigned	0.0	0.0	0.0	0.0	0.0	0.0	0.0	0.0	0.0	0.0	0.0	0.0	0.0	0.0	0.0	0.0	0.0	0.0	0.0	0.0	0.0	0.0	6.0	2.0	1247.0	452.0	118.0	278.0
OTU799875605	Bacteria; Proteobacteria; Deltaproteobacteria; Oligoflexales; 0319-6G20; uncultured bacterium; uncultured bacterium	0.0	0.0	0.0	0.0	0.0	0.0	0.0	0.0	0.0	0.0	0.0	0.0	0.0	0.0	0.0	0.0	0.0	0.0	0.0	0.0	0.0	0.0	1.0	0.0	39.0	116.0	7.0	11.0
OTU463510786	Bacteria; Proteobacteria; Deltaproteobacteria; Myxococcales; P3OB-42; uncultured organism; uncultured organism	0.0	0.0	0.0	0.0	49.0	97.0	17.0	91.0	102.0	3.0	1.0	0.0	0.0	0.0	0.0	0.0	0.0	0.0	0.0	0.0	0.0	0.0	0.0	0.0	0.0	0.0	0.0	0.0
OTU298919787	Bacteria; Verrucomicrobia; WCHB1-41; uncultured bacterium; uncultured bacterium; uncultured bacterium; uncultured bacterium	0.0	0.0	0.0	0.0	3.0	15.0	27.0	59.0	90.0	19.0	43.0	0.0	0.0	0.0	1.0	0.0	0.0	0.0	0.0	0.0	0.0	0.0	0.0	0.0	0.0	0.0	0.0	0.0
OTU989454612	Bacteria; Fibrobacteres; Chitinivibrionia; possible order 07; uncultured bacterium; uncultured bacterium; uncultured bacterium	0.0	0.0	0.0	0.0	0.0	0.0	0.0	0.0	0.0	0.0	0.0	0.0	0.0	0.0	0.0	0.0	0.0	12.0	21.0	37.0	106.0	248.0	47.0	41.0	0.0	0.0	0.0	0.0
OTU205368187	Bacteria; Chloroflexi; Anaerolineae; Anaerolineales; Anaerolineaceae; uncultured	0.0	0.0	0.0	0.0	0.0	0.0	0.0	0.0	0.0	0.0	0.0	0.0	0.0	0.0	0.0	0.0	0.0	1.0	2.0	19.0	22.0	245.0	236.0	182.0	0.0	0.0	0.0	0.0
OTU299089430	Bacteria; Acidobacteria; Subgroup 6; Ambiguous_taxa; Ambiguous_taxa; Ambiguous_taxa; Ambiguous_taxa	0.0	0.0	0.0	0.0	0.0	0.0	0.0	0.0	0.0	0.0	0.0	0.0	0.0	0.0	0.0	0.0	0.0	0.0	0.0	0.0	0.0	0.0	0.0	0.0	61.0	57.0	18.0	152.0
OTU524366136	Bacteria; Chloroflexi; Anaerolineae; Anaerolineales; Anaerolineaceae; uncultured; uncultured bacterium	0.0	0.0	0.0	0.0	0.0	0.0	0.0	0.0	0.0	0.0	0.0	0.0	0.0	0.0	0.0	0.0	0.0	16.0	14.0	20.0	43.0	109.0	29.0	21.0	0.0	0.0	0.0	0.0
OTU762610523	Bacteria; Gemmatimonadetes; Gemmatimonadetes; Gemmatimonadales; Gemmatimonadaceae; uncultured	0.0	0.0	0.0	0.0	0.0	0.0	0.0	0.0	0.0	0.0	0.0	0.0	0.0	0.0	0.0	0.0	0.0	0.0	0.0	0.0	0.0	0.0	0.0	0.0	36.0	190.0	2.0	0.0
OTU614725620	Bacteria; Firmicutes; Clostridia; Clostridiales; Family XII; Fusibacter	2.0	4.0	2.0	4.0	144.0	182.0	2.0	1571.0	3.0	4.0	3.0	1.0	310.0	0.0	0.0	0.0	0.0	1.0	1.0	0.0	0.0	0.0	11.0	2.0	0.0	0.0	0.0	0.0
OTU361464335	Bacteria; Planctomycetes; Phycisphaerae; CCM11a	0.0	0.0	0.0	0.0	1.0	3.0	21.0	207.0	94.0	119.0	136.0	0.0	0.0	0.0	0.0	0.0	0.0	0.0	0.0	0.0	0.0	0.0	0.0	0.0	0.0	0.0	0.0	0.0
OTU927319380	Bacteria; Planctomycetes; Phycisphaerae; mle1-8; uncultured bacterium; uncultured bacterium; uncultured bacterium	0.0	0.0	0.0	0.0	0.0	0.0	0.0	0.0	0.0	0.0	0.0	0.0	0.0	0.0	0.0	0.0	0.0	9.0	10.0	11.0	27.0	52.0	2.0	2.0	0.0	0.0	0.0	0.0
OTU358615324	Bacteria; Proteobacteria; Deltaproteobacteria; Desulfobacterales; Desulfobulbaceae; [Desulfobacterium] catecholicum group	0.0	0.0	1.0	0.0	10.0	14.0	14.0	475.0	442.0	38.0	30.0	0.0	0.0	0.0	0.0	0.0	0.0	0.0	0.0	0.0	0.0	0.0	0.0	0.0	0.0	0.0	0.0	0.0
OTU922032427	Bacteria; Chloroflexi; SBR2076; uncultured bacterium; uncultured bacterium; uncultured bacterium; uncultured bacterium	0.0	0.0	1.0	0.0	0.0	0.0	0.0	0.0	0.0	1.0	0.0	0.0	0.0	0.0	0.0	0.0	0.0	51.0	68.0	132.0	484.0	704.0	443.0	328.0	0.0	0.0	0.0	0.0
OTU927340505	Bacteria; Proteobacteria; Gammaproteobacteria; Methylococcales; Methylococcaceae; Methylocaldum; uncultured bacterium	0.0	0.0	0.0	0.0	0.0	0.0	0.0	0.0	0.0	0.0	0.0	0.0	0.0	0.0	0.0	0.0	0.0	0.0	0.0	0.0	0.0	0.0	3.0	0.0	28.0	65.0	16.0	19.0
OTU107440844	Bacteria; Proteobacteria; Gammaproteobacteria; Thiotrichales; Thiotrichaceae; Thiothrix; uncultured bacterium	0.0	3.0	0.0	3.0	91.0	119.0	35.0	245.0	293.0	107.0	85.0	0.0	0.0	0.0	0.0	1.0	0.0	0.0	0.0	0.0	0.0	1.0	1.0	1.0	0.0	0.0	0.0	0.0
OTU198184094	Bacteria; Planctomycetes; Planctomycetacia; Planctomycetales; Planctomycetaceae; uncultured; uncultured bacterium	0.0	0.0	0.0	0.0	0.0	0.0	0.0	0.0	0.0	0.0	0.0	0.0	0.0	0.0	0.0	0.0	0.0	0.0	0.0	0.0	0.0	0.0	0.0	0.0	32.0	72.0	14.0	55.0
OTU824879820	Bacteria; Nitrospirae; Nitrospira; Nitrospirales; Nitrospiraceae; uncultured	0.0	0.0	0.0	0.0	0.0	0.0	0.0	0.0	0.0	0.0	0.0	0.0	0.0	0.0	0.0	0.0	0.0	2.0	1.0	2.0	36.0	7.0	154.0	116.0	0.0	0.0	0.0	0.0
OTU842065957	Bacteria; Actinobacteria; Actinobacteria; Streptomycetales; Streptomycetaceae; Streptomyces	0.0	2.0	3.0	53.0	0.0	0.0	0.0	0.0	0.0	0.0	0.0	0.0	0.0	5.0	0.0	20.0	2.0	0.0	0.0	0.0	5.0	5.0	0.0	0.0	74.0	13.0	0.0	0.0
OTU158881796	Bacteria; Chloroflexi; Anaerolineae; Anaerolineales; Anaerolineaceae; uncultured	0.0	0.0	0.0	0.0	9.0	4.0	10.0	0.0	46.0	62.0	72.0	0.0	0.0	0.0	0.0	0.0	0.0	0.0	0.0	0.0	0.0	0.0	0.0	0.0	0.0	0.0	0.0	0.0
OTU581574031	Bacteria; Proteobacteria; Gammaproteobacteria; Xanthomonadales; Xanthomonadaceae; uncultured; Ambiguous_taxa	0.0	0.0	0.0	0.0	116.0	148.0	97.0	143.0	72.0	109.0	79.0	0.0	0.0	0.0	0.0	1.0	0.0	0.0	0.0	0.0	11.0	0.0	0.0	0.0	0.0	0.0	1.0	0.0
OTU12344886	Unassigned	0.0	0.0	0.0	0.0	0.0	0.0	0.0	0.0	0.0	0.0	0.0	0.0	0.0	0.0	0.0	0.0	0.0	8.0	7.0	2.0	8.0	66.0	13.0	7.0	0.0	0.0	0.0	0.0
OTU165167982	Bacteria; Gemmatimonadetes; Gemmatimonadetes; Gemmatimonadales; Gemmatimonadaceae; uncultured	0.0	0.0	0.0	0.0	0.0	0.0	0.0	0.0	0.0	0.0	0.0	0.0	0.0	0.0	0.0	0.0	0.0	0.0	0.0	0.0	0.0	0.0	0.0	0.0	109.0	0.0	4.0	4.0
OTU878561698	Bacteria; Planctomycetes; OM190; uncultured bacterium; uncultured bacterium; uncultured bacterium; uncultured bacterium	0.0	0.0	0.0	0.0	0.0	0.0	0.0	0.0	0.0	0.0	0.0	0.0	0.0	0.0	0.0	6.0	0.0	0.0	0.0	0.0	0.0	0.0	7.0	7.0	353.0	95.0	307.0	342.0
OTU67274126	Bacteria; Proteobacteria; Alphaproteobacteria; Rhizobiales; Methylobacteriaceae; Meganema	1.0	0.0	1.0	0.0	7.0	12.0	8.0	45.0	69.0	70.0	69.0	0.0	0.0	0.0	0.0	0.0	0.0	0.0	0.0	0.0	0.0	0.0	0.0	0.0	0.0	0.0	0.0	0.0
OTU355057480	Bacteria; Verrucomicrobia; OPB35 soil group; Ambiguous_taxa; Ambiguous_taxa; Ambiguous_taxa; Ambiguous_taxa	0.0	0.0	0.0	0.0	0.0	0.0	0.0	0.0	0.0	0.0	0.0	0.0	0.0	0.0	0.0	0.0	0.0	0.0	0.0	0.0	0.0	0.0	9.0	3.0	241.0	20.0	435.0	695.0
OTU891873668	Bacteria; Bacteroidetes; WCHB1-32; uncultured bacterium; uncultured bacterium; uncultured bacterium; uncultured bacterium	0.0	0.0	0.0	0.0	33.0	15.0	6.0	91.0	91.0	15.0	33.0	0.0	0.0	0.0	0.0	0.0	0.0	0.0	0.0	0.0	0.0	0.0	0.0	0.0	0.0	0.0	0.0	0.0
OTU197348815	Bacteria; Latescibacteria; uncultured bacterium; uncultured bacterium; uncultured bacterium; uncultured bacterium; uncultured bacterium	0.0	0.0	0.0	0.0	0.0	0.0	0.0	0.0	0.0	0.0	0.0	0.0	0.0	1.0	0.0	2.0	0.0	0.0	0.0	0.0	0.0	0.0	0.0	0.0	101.0	2.0	10.0	25.0
OTU909487519	Bacteria; Proteobacteria; Deltaproteobacteria; Desulfurellales; Desulfurellaceae; H16; uncultured bacterium	0.0	0.0	0.0	0.0	0.0	0.0	0.0	0.0	0.0	0.0	0.0	0.0	0.0	0.0	0.0	0.0	0.0	0.0	0.0	0.0	0.0	0.0	2.0	1.0	8.0	10.0	119.0	48.0
OTU825789172	Bacteria; Chlorobi; Chlorobia; Chlorobiales; OPB56; uncultured bacterium; uncultured bacterium	0.0	1.0	0.0	0.0	2.0	1.0	5.0	77.0	49.0	3.0	8.0	0.0	0.0	0.0	0.0	0.0	0.0	0.0	0.0	0.0	0.0	0.0	0.0	0.0	0.0	0.0	0.0	0.0
OTU502704341	Unassigned	0.0	0.0	0.0	0.0	14.0	9.0	4.0	54.0	58.0	3.0	13.0	0.0	0.0	0.0	0.0	0.0	0.0	0.0	0.0	0.0	0.0	0.0	0.0	0.0	0.0	0.0	0.0	0.0
OTU62648717	Bacteria; Spirochaetae; Spirochaetes; Spirochaetales; Spirochaetaceae; Spirochaeta 2; uncultured bacterium	0.0	0.0	0.0	0.0	0.0	0.0	0.0	0.0	0.0	0.0	0.0	0.0	0.0	0.0	0.0	0.0	0.0	0.0	0.0	0.0	0.0	0.0	0.0	0.0	37.0	71.0	1.0	8.0
OTU918959202	Bacteria; Chloroflexi; Anaerolineae; Anaerolineales; Anaerolineaceae; uncultured; uncultured Chloroflexi bacterium	0.0	0.0	0.0	0.0	5.0	8.0	55.0	6.0	28.0	12.0	64.0	0.0	0.0	0.0	0.0	0.0	0.0	0.0	0.0	0.0	0.0	0.0	0.0	0.0	0.0	0.0	1.0	0.0
OTU413295682	Bacteria; Proteobacteria; Gammaproteobacteria; Thiotrichales; Thiotrichaceae	0.0	0.0	0.0	0.0	6.0	6.0	3.0	0.0	0.0	63.0	85.0	0.0	0.0	0.0	0.0	0.0	0.0	0.0	0.0	0.0	0.0	0.0	0.0	0.0	0.0	0.0	0.0	0.0
OTU396235756	Bacteria; Planctomycetes; Phycisphaerae; Phycisphaerales; Phycisphaeraceae; SM1A02; uncultured bacterium	0.0	0.0	0.0	0.0	33.0	50.0	2.0	19.0	13.0	45.0	115.0	0.0	0.0	0.0	0.0	0.0	0.0	0.0	0.0	0.0	0.0	0.0	0.0	0.0	0.0	0.0	0.0	0.0
OTU753600129	Bacteria; Bacteroidetes; Bacteroidia; Bacteroidales; FTLpost3; uncultured bacterium; uncultured bacterium	0.0	0.0	0.0	0.0	3.0	0.0	9.0	26.0	109.0	1.0	4.0	0.0	0.0	0.0	0.0	0.0	0.0	0.0	0.0	0.0	0.0	0.0	0.0	0.0	0.0	0.0	0.0	0.0
OTU600826334	Bacteria; Proteobacteria; Deltaproteobacteria; NB1-j; uncultured bacterium; uncultured bacterium; uncultured bacterium	0.0	0.0	0.0	0.0	0.0	0.0	0.0	0.0	0.0	0.0	0.0	0.0	0.0	0.0	0.0	0.0	0.0	0.0	0.0	0.0	0.0	0.0	0.0	0.0	251.0	305.0	9.0	15.0
OTU201860455	Bacteria; Bacteroidetes; Sphingobacteriia; Sphingobacteriales; env.OPS 17; uncultured Bacteroidetes bacterium; uncultured Bacteroidetes bacterium	0.0	0.0	0.0	0.0	0.0	1.0	0.0	0.0	1.0	3.0	0.0	34.0	49.0	0.0	0.0	0.0	0.0	0.0	0.0	0.0	83.0	0.0	0.0	1.0	0.0	3.0	0.0	0.0
OTU139503775	Bacteria; Nitrospirae; Nitrospira; Nitrospirales; wb1-A12; uncultured bacterium; uncultured bacterium	0.0	0.0	0.0	2.0	0.0	0.0	0.0	0.0	0.0	0.0	0.0	0.0	0.0	1.0	0.0	21.0	0.0	0.0	0.0	0.0	0.0	2.0	0.0	0.0	594.0	35.0	4.0	1485.0
OTU293838440	Bacteria; Proteobacteria; Deltaproteobacteria; Desulfuromonadales; Geobacteraceae; Geobacter; Ambiguous_taxa	6.0	21.0	9.0	8.0	25.0	16.0	6.0	32.0	26.0	21.0	49.0	2.0	10.0	5.0	1.0	2.0	0.0	2.0	0.0	0.0	0.0	0.0	0.0	0.0	0.0	0.0	0.0	0.0
OTU105031901	Bacteria; Proteobacteria; Deltaproteobacteria; Desulfobacterales; Desulfobacteraceae	0.0	0.0	0.0	0.0	0.0	0.0	13.0	287.0	158.0	7.0	6.0	0.0	0.0	0.0	0.0	0.0	0.0	0.0	0.0	0.0	0.0	0.0	0.0	0.0	0.0	0.0	0.0	0.0
OTU348007478	Bacteria; Saccharibacteria; uncultured bacterium; uncultured bacterium; uncultured bacterium; uncultured bacterium; uncultured bacterium	0.0	0.0	0.0	0.0	0.0	2.0	0.0	0.0	0.0	0.0	0.0	0.0	0.0	0.0	0.0	0.0	0.0	0.0	0.0	0.0	0.0	0.0	0.0	1.0	78.0	63.0	6.0	1.0
OTU37477317	Bacteria; Bacteroidetes; Sphingobacteriia; Sphingobacteriales; S15A-MN91	0.0	0.0	0.0	0.0	2.0	20.0	316.0	1786.0	1224.0	0.0	0.0	0.0	0.0	0.0	0.0	0.0	0.0	0.0	1.0	0.0	0.0	0.0	0.0	0.0	0.0	0.0	0.0	0.0
OTU601560017	Unassigned	0.0	0.0	0.0	0.0	0.0	0.0	0.0	0.0	0.0	107.0	48.0	0.0	0.0	0.0	0.0	0.0	0.0	0.0	2.0	2.0	1.0	0.0	4.0	0.0	0.0	0.0	0.0	0.0
OTU435253768	Unassigned	0.0	0.0	0.0	0.0	64.0	49.0	7.0	4.0	14.0	0.0	0.0	0.0	0.0	0.0	0.0	0.0	0.0	0.0	0.0	0.0	37.0	0.0	0.0	0.0	0.0	0.0	0.0	0.0
OTU231306139	Bacteria; Chloroflexi; Ardenticatenia; uncultured	0.0	0.0	0.0	0.0	0.0	0.0	0.0	0.0	0.0	0.0	0.0	0.0	0.0	0.0	0.0	0.0	0.0	0.0	0.0	0.0	0.0	0.0	6.0	0.0	629.0	418.0	176.0	364.0
OTU731941587	Bacteria; Chlorobi; Chlorobia; Chlorobiales; OPB56; uncultured bacterium; uncultured bacterium	0.0	0.0	0.0	0.0	0.0	0.0	0.0	0.0	0.0	0.0	0.0	0.0	0.0	0.0	0.0	1.0	0.0	0.0	0.0	0.0	0.0	0.0	2.0	0.0	24.0	15.0	97.0	199.0
OTU275235024	Bacteria; Proteobacteria; Deltaproteobacteria; NB1-j; uncultured bacterium; uncultured bacterium; uncultured bacterium	0.0	0.0	0.0	0.0	0.0	0.0	0.0	0.0	0.0	0.0	0.0	0.0	0.0	0.0	0.0	0.0	0.0	0.0	0.0	0.0	0.0	0.0	3.0	2.0	32.0	43.0	59.0	66.0
OTU308284799	Bacteria; Proteobacteria; Epsilonproteobacteria; Campylobacterales; Helicobacteraceae; uncultured	46.0	148.0	438.0	710.0	2.0	5.0	0.0	0.0	0.0	0.0	0.0	4.0	1.0	42.0	2.0	20.0	8.0	9.0	14.0	0.0	1.0	3.0	0.0	0.0	0.0	0.0	0.0	0.0
OTU840113039	Unassigned	0.0	0.0	0.0	0.0	0.0	0.0	0.0	0.0	0.0	0.0	0.0	0.0	0.0	0.0	0.0	2.0	0.0	0.0	0.0	0.0	0.0	0.0	13.0	12.0	4077.0	5211.0	441.0	1056.0
OTU383421744	Bacteria; Latescibacteria; uncultured bacterium; uncultured bacterium; uncultured bacterium; uncultured bacterium; uncultured bacterium	0.0	0.0	0.0	0.0	0.0	0.0	0.0	0.0	0.0	0.0	0.0	0.0	0.0	0.0	0.0	0.0	0.0	0.0	3.0	16.0	23.0	43.0	19.0	18.0	0.0	0.0	0.0	0.0
OTU567152718	Bacteria; Bacteroidetes; Sphingobacteriia; Sphingobacteriales; Lentimicrobiaceae; uncultured bacterium; uncultured bacterium	0.0	0.0	0.0	0.0	3.0	3.0	17.0	107.0	174.0	2.0	0.0	0.0	0.0	0.0	0.0	0.0	0.0	0.0	0.0	0.0	0.0	0.0	0.0	0.0	0.0	0.0	0.0	0.0
OTU594978400	Bacteria; Firmicutes; Clostridia; Clostridiales; Family XII; Acidaminobacter; Ambiguous_taxa	0.0	2.0	1.0	0.0	22.0	31.0	1.0	482.0	2.0	25.0	18.0	0.0	4.0	0.0	0.0	0.0	0.0	4.0	1.0	0.0	0.0	0.0	0.0	0.0	0.0	0.0	0.0	0.0
OTU387029292	Unassigned	0.0	0.0	0.0	0.0	25.0	23.0	42.0	187.0	159.0	1.0	3.0	0.0	0.0	0.0	0.0	0.0	0.0	0.0	0.0	0.0	0.0	0.0	0.0	0.0	0.0	0.0	0.0	0.0
OTU521960049	Bacteria; Planctomycetes; Phycisphaerae; Tepidisphaerales; Tepidisphaeraceae; uncultured bacterium; uncultured bacterium	0.0	0.0	0.0	0.0	0.0	0.0	0.0	0.0	0.0	0.0	0.0	0.0	0.0	0.0	0.0	0.0	0.0	0.0	0.0	0.0	0.0	0.0	2.0	1.0	22.0	20.0	88.0	80.0
OTU622124125	Bacteria; SBR1093; uncultured bacterium; uncultured bacterium; uncultured bacterium; uncultured bacterium; uncultured bacterium	0.0	0.0	0.0	0.0	0.0	0.0	0.0	0.0	0.0	0.0	0.0	0.0	0.0	0.0	0.0	0.0	0.0	0.0	0.0	0.0	0.0	0.0	0.0	0.0	36.0	0.0	9.0	79.0
OTU748697473	Bacteria; Proteobacteria; Deltaproteobacteria; Syntrophobacterales; Syntrophaceae; uncultured; uncultured bacterium	0.0	0.0	0.0	0.0	0.0	0.0	0.0	0.0	0.0	0.0	0.0	0.0	0.0	0.0	0.0	2.0	1.0	0.0	0.0	0.0	0.0	0.0	8.0	8.0	200.0	711.0	414.0	576.0
OTU593632629	Unassigned	0.0	0.0	0.0	0.0	0.0	0.0	0.0	0.0	0.0	0.0	0.0	0.0	0.0	0.0	0.0	0.0	0.0	0.0	0.0	0.0	0.0	0.0	0.0	0.0	65.0	240.0	15.0	36.0
OTU97500318	Bacteria; Gemmatimonadetes; Gemmatimonadetes; Gemmatimonadales; Gemmatimonadaceae; Gemmatirosa; uncultured bacterium	0.0	0.0	0.0	0.0	0.0	0.0	0.0	0.0	0.0	0.0	0.0	0.0	0.0	0.0	0.0	0.0	0.0	0.0	0.0	0.0	0.0	0.0	2.0	0.0	55.0	3.0	30.0	44.0
OTU520006718	Unassigned	0.0	0.0	0.0	1.0	0.0	0.0	0.0	0.0	0.0	0.0	0.0	0.0	0.0	0.0	0.0	0.0	0.0	0.0	0.0	1.0	1.0	1.0	128.0	93.0	0.0	0.0	0.0	0.0
OTU438638363	Bacteria; Proteobacteria; Epsilonproteobacteria; Campylobacterales; Helicobacteraceae; uncultured bacterium; uncultured bacterium	1.0	2.0	2.0	0.0	728.0	888.0	82.0	57.0	410.0	47.0	134.0	0.0	0.0	0.0	0.0	1.0	0.0	0.0	1.0	0.0	0.0	0.0	0.0	0.0	0.0	0.0	0.0	0.0
OTU854927482	Bacteria; Bacteroidetes; Sphingobacteriia; Sphingobacteriales; ST-12K33	0.0	0.0	0.0	0.0	6.0	8.0	17.0	290.0	231.0	7.0	7.0	0.0	1.0	0.0	0.0	0.0	0.0	0.0	0.0	0.0	0.0	0.0	0.0	0.0	0.0	0.0	0.0	0.0
OTU583230367	Bacteria; Chloroflexi; Anaerolineae; Anaerolineales; Anaerolineaceae; Leptolinea; uncultured soil bacterium	0.0	0.0	0.0	0.0	1.0	2.0	2.0	117.0	11.0	0.0	7.0	0.0	0.0	0.0	0.0	0.0	0.0	0.0	0.0	0.0	0.0	0.0	0.0	0.0	0.0	0.0	0.0	0.0
OTU241245883	Unassigned	1.0	0.0	0.0	0.0	178.0	242.0	449.0	3281.0	2261.0	207.0	282.0	0.0	0.0	0.0	0.0	0.0	0.0	0.0	0.0	0.0	0.0	1.0	0.0	0.0	0.0	0.0	0.0	0.0
OTU991658768	Bacteria; Proteobacteria; Alphaproteobacteria; Rhizobiales; Beijerinckiaceae; uncultured	2.0	8.0	1.0	25.0	0.0	0.0	0.0	0.0	5.0	0.0	1.0	0.0	0.0	2.0	0.0	62.0	1.0	0.0	1.0	0.0	0.0	1.0	3.0	3.0	558.0	571.0	80.0	161.0
OTU636998773	Bacteria; Proteobacteria; Deltaproteobacteria; Desulfobacterales; Desulfobulbaceae; [Desulfobacterium] catecholicum group; uncultured bacterium	0.0	0.0	0.0	0.0	0.0	4.0	2.0	127.0	156.0	8.0	5.0	0.0	0.0	0.0	0.0	0.0	0.0	0.0	0.0	0.0	0.0	0.0	0.0	0.0	0.0	0.0	0.0	0.0
OTU578418556	Bacteria; Chloroflexi; Anaerolineae; Anaerolineales; Anaerolineaceae; Anaerolinea; uncultured bacterium	0.0	0.0	0.0	0.0	0.0	1.0	1.0	53.0	27.0	35.0	33.0	0.0	0.0	0.0	0.0	0.0	0.0	0.0	0.0	0.0	0.0	0.0	0.0	0.0	0.0	0.0	0.0	0.0
OTU449377267	Unassigned	0.0	0.0	0.0	0.0	0.0	0.0	0.0	0.0	0.0	0.0	0.0	0.0	0.0	0.0	0.0	0.0	0.0	0.0	0.0	0.0	0.0	0.0	1.0	0.0	37.0	6.0	76.0	2.0
OTU853287344	Bacteria; Proteobacteria; Deltaproteobacteria; Desulfobacterales; Desulfobulbaceae; [Desulfobacterium] catecholicum group	0.0	0.0	0.0	0.0	3.0	9.0	37.0	466.0	419.0	42.0	24.0	0.0	0.0	0.0	0.0	0.0	0.0	0.0	0.0	0.0	0.0	0.0	0.0	0.0	0.0	0.0	0.0	0.0
OTU417319507	Bacteria; Proteobacteria; Deltaproteobacteria; Sva0485; uncultured delta proteobacterium; uncultured delta proteobacterium; uncultured delta proteobacterium	0.0	0.0	0.0	0.0	0.0	0.0	0.0	0.0	0.0	0.0	0.0	0.0	0.0	0.0	0.0	0.0	0.0	9.0	7.0	5.0	50.0	28.0	11.0	9.0	0.0	0.0	0.0	0.0
OTU860384990	Unassigned	0.0	0.0	0.0	0.0	0.0	0.0	0.0	0.0	0.0	0.0	0.0	0.0	0.0	0.0	0.0	0.0	0.0	2.0	1.0	14.0	83.0	125.0	19.0	13.0	0.0	0.0	0.0	0.0
OTU451020175	Bacteria; Chloroflexi; Anaerolineae; Anaerolineales; Anaerolineaceae; uncultured	0.0	0.0	0.0	0.0	0.0	0.0	0.0	0.0	0.0	2.0	2.0	0.0	0.0	0.0	0.0	0.0	0.0	10.0	8.0	14.0	55.0	65.0	50.0	44.0	0.0	0.0	0.0	0.0
OTU501822565	Bacteria; Bacteroidetes; Sphingobacteriia; Sphingobacteriales; Lentimicrobiaceae; uncultured bacterium; uncultured bacterium	0.0	0.0	0.0	0.0	3.0	2.0	53.0	872.0	430.0	130.0	112.0	0.0	0.0	2.0	0.0	0.0	0.0	0.0	0.0	0.0	0.0	0.0	0.0	0.0	0.0	0.0	0.0	0.0
OTU799652636	Bacteria; Chloroflexi; Dehalococcoidia; Napoli-4B-65; uncultured bacterium; uncultured bacterium; uncultured bacterium	0.0	0.0	0.0	0.0	0.0	0.0	0.0	0.0	0.0	0.0	0.0	0.0	0.0	0.0	0.0	0.0	0.0	5.0	5.0	3.0	69.0	51.0	19.0	12.0	0.0	0.0	0.0	0.0
OTU262287341	Bacteria; Proteobacteria; Deltaproteobacteria	0.0	0.0	0.0	0.0	3.0	5.0	23.0	76.0	69.0	0.0	1.0	0.0	0.0	0.0	0.0	0.0	0.0	0.0	0.0	0.0	0.0	0.0	0.0	0.0	0.0	0.0	0.0	0.0
OTU888950148	Bacteria; Planctomycetes; OM190; uncultured bacterium; uncultured bacterium; uncultured bacterium; uncultured bacterium	1.0	2.0	0.0	0.0	0.0	2.0	0.0	0.0	0.0	80.0	56.0	0.0	0.0	0.0	0.0	0.0	0.0	0.0	0.0	0.0	0.0	0.0	0.0	0.0	0.0	0.0	0.0	0.0
OTU873088219	Bacteria; Chloroflexi; Anaerolineae; Anaerolineales; Anaerolineaceae; uncultured	0.0	0.0	0.0	0.0	2.0	1.0	0.0	0.0	0.0	0.0	0.0	0.0	0.0	0.0	0.0	0.0	0.0	0.0	0.0	0.0	0.0	0.0	0.0	0.0	229.0	52.0	0.0	6.0
OTU504584185	Archaea; AK8; uncultured archaeon; uncultured archaeon; uncultured archaeon; uncultured archaeon; uncultured archaeon	0.0	0.0	0.0	0.0	0.0	0.0	0.0	0.0	0.0	0.0	0.0	0.0	0.0	0.0	0.0	0.0	0.0	14.0	19.0	7.0	47.0	40.0	16.0	20.0	0.0	0.0	0.0	0.0
OTU29710201	Unassigned	0.0	0.0	0.0	0.0	0.0	0.0	0.0	0.0	0.0	0.0	1.0	0.0	0.0	0.0	0.0	0.0	0.0	0.0	0.0	0.0	0.0	0.0	0.0	0.0	97.0	48.0	0.0	0.0
OTU583171822	Unassigned	0.0	0.0	0.0	0.0	4.0	1.0	10.0	58.0	39.0	2.0	5.0	0.0	0.0	0.0	0.0	0.0	0.0	0.0	0.0	0.0	0.0	0.0	0.0	0.0	0.0	0.0	2.0	0.0
OTU335515088	Bacteria; Planctomycetes; vadinHA49; uncultured bacterium; uncultured bacterium; uncultured bacterium; uncultured bacterium	0.0	2.0	0.0	0.0	14.0	23.0	8.0	20.0	57.0	15.0	20.0	0.0	0.0	0.0	0.0	0.0	0.0	0.0	0.0	0.0	0.0	0.0	0.0	0.0	0.0	0.0	0.0	0.0
OTU219591011	Bacteria; Proteobacteria; Betaproteobacteria; Methylophilales; Methylophilaceae	1.0	0.0	2.0	0.0	0.0	0.0	0.0	0.0	0.0	0.0	0.0	0.0	0.0	4.0	0.0	0.0	0.0	0.0	0.0	0.0	239.0	0.0	9.0	3.0	0.0	0.0	0.0	0.0
OTU714114479	Bacteria; Proteobacteria; Alphaproteobacteria; Rhizobiales; A0839; uncultured bacterium; uncultured bacterium	0.0	0.0	0.0	0.0	0.0	0.0	1.0	5.0	0.0	108.0	183.0	0.0	0.0	0.0	0.0	0.0	0.0	0.0	0.0	0.0	0.0	0.0	0.0	0.0	0.0	0.0	0.0	0.0
OTU691391192	Bacteria; Bacteroidetes; Sphingobacteriia; Sphingobacteriales; Chitinophagaceae; Sediminibacterium	1.0	4.0	3.0	3.0	138.0	229.0	6.0	14.0	18.0	7.0	10.0	22.0	10.0	1.0	0.0	0.0	0.0	0.0	0.0	0.0	53.0	0.0	0.0	0.0	0.0	0.0	0.0	0.0
OTU884570106	Bacteria; Proteobacteria; Alphaproteobacteria; Rhizobiales; Hyphomicrobiaceae; Hyphomicrobium; uncultured bacterium	1.0	2.0	0.0	5.0	0.0	1.0	0.0	0.0	0.0	3.0	1.0	0.0	0.0	0.0	0.0	0.0	0.0	0.0	0.0	0.0	0.0	0.0	0.0	0.0	33.0	41.0	15.0	51.0
OTU896549770	Bacteria; Proteobacteria; Alphaproteobacteria; Rhodospirillales; AT-s3-44; uncultured alpha proteobacterium; uncultured alpha proteobacterium	0.0	0.0	0.0	0.0	0.0	0.0	18.0	78.0	38.0	0.0	0.0	0.0	0.0	0.0	0.0	0.0	0.0	0.0	0.0	0.0	0.0	0.0	0.0	0.0	0.0	0.0	0.0	0.0
OTU431539695	Bacteria; Cyanobacteria; Melainabacteria; Obscuribacterales; uncultured bacterium; uncultured bacterium; uncultured bacterium	0.0	0.0	0.0	0.0	0.0	0.0	0.0	0.0	0.0	0.0	0.0	0.0	0.0	0.0	0.0	0.0	0.0	0.0	0.0	0.0	0.0	0.0	1.0	0.0	24.0	429.0	51.0	57.0
OTU791702254	Unassigned	0.0	0.0	0.0	0.0	0.0	2.0	163.0	1664.0	118.0	28.0	61.0	0.0	0.0	0.0	0.0	0.0	0.0	0.0	0.0	0.0	0.0	1.0	0.0	0.0	0.0	0.0	0.0	0.0
OTU124112695	Bacteria; Actinobacteria; Actinobacteria; Micrococcales; Microbacteriaceae; Agromyces; Ambiguous_taxa	0.0	109.0	18.0	462.0	0.0	0.0	0.0	2.0	0.0	1.0	0.0	0.0	0.0	0.0	1.0	0.0	1.0	0.0	0.0	0.0	0.0	0.0	0.0	0.0	0.0	8.0	0.0	0.0
OTU700379153	Bacteria; Proteobacteria; Alphaproteobacteria; Rhizobiales; Rhizobiales Incertae Sedis; Bauldia	0.0	0.0	0.0	0.0	0.0	0.0	0.0	0.0	0.0	1.0	1.0	0.0	0.0	0.0	0.0	1.0	0.0	0.0	0.0	0.0	0.0	0.0	0.0	0.0	47.0	79.0	11.0	9.0
OTU90461639	Unassigned	0.0	0.0	0.0	0.0	0.0	0.0	0.0	0.0	0.0	0.0	0.0	0.0	0.0	0.0	0.0	0.0	0.0	15.0	18.0	19.0	54.0	92.0	17.0	14.0	0.0	0.0	0.0	0.0
OTU906957556	Unassigned	0.0	0.0	1.0	0.0	9.0	15.0	29.0	60.0	87.0	1.0	0.0	0.0	0.0	0.0	0.0	0.0	0.0	0.0	0.0	0.0	0.0	0.0	0.0	0.0	0.0	0.0	0.0	0.0
OTU134627722	Bacteria; Chloroflexi; Anaerolineae; Anaerolineales; Anaerolineaceae; uncultured; uncultured Chloroflexi bacterium	0.0	0.0	0.0	0.0	0.0	0.0	0.0	0.0	0.0	0.0	0.0	0.0	0.0	0.0	0.0	0.0	0.0	0.0	0.0	0.0	0.0	0.0	3.0	4.0	788.0	264.0	93.0	1681.0
OTU31538453	Bacteria; Firmicutes; Clostridia; Clostridiales; MAT-CR-H4-C10; uncultured bacterium; uncultured bacterium	0.0	0.0	0.0	0.0	6.0	3.0	0.0	5.0	1.0	37.0	61.0	0.0	0.0	0.0	0.0	0.0	0.0	0.0	0.0	0.0	0.0	0.0	0.0	0.0	0.0	0.0	0.0	0.0
OTU114444664	Bacteria; Proteobacteria; Deltaproteobacteria; Syntrophobacterales; Syntrophaceae; uncultured	0.0	0.0	0.0	0.0	0.0	0.0	0.0	0.0	0.0	0.0	0.0	0.0	0.0	0.0	0.0	0.0	0.0	0.0	0.0	0.0	0.0	0.0	0.0	2.0	173.0	163.0	55.0	135.0
OTU578118894	Bacteria; Proteobacteria; Betaproteobacteria; Methylophilales; Methylophilaceae	2.0	0.0	0.0	0.0	1185.0	777.0	94.0	34.0	264.0	2.0	25.0	0.0	0.0	0.0	0.0	0.0	0.0	0.0	0.0	0.0	0.0	0.0	0.0	0.0	0.0	0.0	0.0	0.0
OTU866757293	Bacteria; Bacteroidetes; Sphingobacteriia; Sphingobacteriales; Chitinophagaceae; Terrimonas; uncultured bacterium	0.0	0.0	0.0	0.0	0.0	0.0	0.0	0.0	0.0	0.0	0.0	0.0	0.0	0.0	0.0	0.0	0.0	0.0	0.0	0.0	0.0	0.0	0.0	0.0	0.0	534.0	0.0	0.0
OTU116748128	Bacteria; Proteobacteria; Gammaproteobacteria; Xanthomonadales; uncultured; uncultured bacterium; uncultured bacterium	1.0	3.0	2.0	4.0	0.0	0.0	0.0	0.0	0.0	0.0	0.0	0.0	0.0	0.0	0.0	6.0	2.0	0.0	0.0	0.0	0.0	0.0	7.0	7.0	301.0	518.0	401.0	118.0
OTU985855553	Bacteria; Proteobacteria; Betaproteobacteria; Nitrosomonadales; Gallionellaceae; Candidatus Nitrotoga; uncultured bacterium	0.0	1.0	0.0	0.0	0.0	0.0	0.0	0.0	0.0	0.0	0.0	0.0	0.0	0.0	0.0	0.0	0.0	0.0	0.0	0.0	168.0	0.0	0.0	0.0	0.0	0.0	0.0	0.0
OTU573571120	Bacteria; Proteobacteria; Alphaproteobacteria; Rhizobiales; A0839; Ambiguous_taxa; Ambiguous_taxa	0.0	0.0	0.0	0.0	0.0	0.0	6.0	3.0	4.0	49.0	84.0	0.0	0.0	0.0	0.0	0.0	0.0	0.0	0.0	0.0	0.0	0.0	0.0	0.0	0.0	0.0	0.0	0.0
OTU710534262	Bacteria; Actinobacteria; OPB41; uncultured bacterium; uncultured bacterium; uncultured bacterium; uncultured bacterium	0.0	3.0	1.0	4.0	0.0	0.0	0.0	0.0	0.0	0.0	0.0	0.0	0.0	0.0	1.0	1.0	0.0	51.0	55.0	97.0	223.0	466.0	109.0	76.0	0.0	0.0	0.0	0.0
OTU375515203	Bacteria; Bacteroidetes; Bacteroidetes BD2-2	0.0	0.0	0.0	0.0	15.0	9.0	43.0	0.0	83.0	0.0	0.0	0.0	0.0	0.0	0.0	0.0	0.0	0.0	0.0	0.0	0.0	0.0	0.0	0.0	0.0	0.0	0.0	0.0
OTU43071942	Bacteria; Proteobacteria; Deltaproteobacteria; Syntrophobacterales; Syntrophaceae; uncultured	0.0	0.0	0.0	0.0	0.0	0.0	0.0	0.0	0.0	1.0	1.0	0.0	0.0	0.0	0.0	0.0	0.0	37.0	39.0	31.0	105.0	118.0	84.0	53.0	0.0	0.0	0.0	0.0
OTU820892610	Bacteria; Verrucomicrobia; Verrucomicrobia Incertae Sedis; Unknown Order; Unknown Family; Candidatus Methylacidiphilum; uncultured bacterium	0.0	0.0	0.0	0.0	0.0	0.0	0.0	0.0	0.0	0.0	0.0	0.0	0.0	0.0	0.0	0.0	0.0	0.0	0.0	0.0	0.0	0.0	5.0	0.0	0.0	17.0	186.0	293.0
OTU901578666	Bacteria; Verrucomicrobia; Spartobacteria; Chthoniobacterales; Xiphinematobacteraceae; Candidatus Xiphinematobacter; uncultured bacterium	0.0	0.0	0.0	0.0	0.0	0.0	0.0	0.0	0.0	0.0	0.0	0.0	0.0	0.0	1.0	0.0	0.0	0.0	0.0	0.0	0.0	0.0	3.0	0.0	203.0	204.0	36.0	48.0
OTU508501731	Bacteria; Proteobacteria; Gammaproteobacteria; Xanthomonadales; Xanthomonadaceae; uncultured; Ambiguous_taxa	0.0	0.0	0.0	0.0	39.0	32.0	37.0	143.0	41.0	4.0	12.0	0.0	0.0	0.0	0.0	0.0	0.0	0.0	0.0	0.0	0.0	0.0	0.0	0.0	0.0	0.0	0.0	0.0
OTU525219497	Bacteria; Proteobacteria; Gammaproteobacteria; Methylococcales; Methylococcaceae	0.0	0.0	0.0	0.0	0.0	0.0	0.0	0.0	0.0	0.0	0.0	0.0	0.0	0.0	0.0	0.0	0.0	0.0	0.0	0.0	0.0	0.0	1.0	0.0	31.0	52.0	91.0	270.0
OTU534366053	Bacteria; Chlamydiae; Chlamydiae; Chlamydiales; cvE6; uncultured bacterium; uncultured bacterium	0.0	0.0	0.0	0.0	0.0	0.0	0.0	0.0	0.0	0.0	0.0	0.0	0.0	0.0	0.0	0.0	0.0	0.0	0.0	0.0	0.0	0.0	0.0	0.0	104.0	17.0	0.0	0.0
OTU221134455	Bacteria; Proteobacteria; Alphaproteobacteria; Sphingomonadales; Sphingomonadaceae; Zymomonas	1.0	0.0	1.0	0.0	3.0	1.0	27.0	38.0	75.0	6.0	91.0	0.0	0.0	0.0	0.0	1.0	0.0	0.0	0.0	0.0	1.0	0.0	0.0	0.0	0.0	0.0	0.0	0.0
OTU852021428	Unassigned	0.0	0.0	0.0	0.0	0.0	0.0	0.0	0.0	0.0	33.0	148.0	0.0	0.0	0.0	0.0	0.0	0.0	0.0	0.0	0.0	0.0	0.0	0.0	0.0	0.0	0.0	0.0	0.0
OTU157937118	Bacteria; Proteobacteria; Gammaproteobacteria; Xanthomonadales; Xanthomonadales Incertae Sedis; uncultured; uncultured bacterium	1.0	0.0	0.0	0.0	0.0	0.0	0.0	0.0	0.0	0.0	0.0	0.0	0.0	0.0	0.0	4.0	1.0	0.0	0.0	0.0	0.0	0.0	1.0	0.0	160.0	76.0	51.0	107.0
OTU737689170	Bacteria; Spirochaetae; Spirochaetes; Spirochaetales; Spirochaetaceae; Treponema	0.0	0.0	0.0	0.0	20.0	26.0	170.0	1869.0	1132.0	18.0	53.0	0.0	0.0	0.0	0.0	0.0	0.0	0.0	0.0	0.0	0.0	0.0	0.0	0.0	0.0	0.0	0.0	0.0
OTU314357016	Unassigned	0.0	0.0	0.0	0.0	5.0	5.0	9.0	43.0	2.0	20.0	68.0	0.0	0.0	2.0	0.0	0.0	0.0	0.0	0.0	0.0	0.0	0.0	0.0	0.0	0.0	0.0	0.0	0.0
OTU429384030	Bacteria; BRC1	0.0	0.0	0.0	0.0	0.0	0.0	0.0	0.0	0.0	0.0	0.0	0.0	0.0	0.0	0.0	0.0	0.0	0.0	0.0	0.0	0.0	0.0	8.0	2.0	1002.0	1082.0	222.0	379.0
OTU14326000	Bacteria; Proteobacteria; Alphaproteobacteria; Rhodospirillales; I-10; Ambiguous_taxa; Ambiguous_taxa	0.0	0.0	0.0	0.0	6.0	18.0	2.0	12.0	11.0	31.0	76.0	0.0	0.0	1.0	0.0	0.0	0.0	0.0	0.0	0.0	0.0	0.0	0.0	0.0	0.0	0.0	0.0	0.0
OTU79470692	Bacteria; Actinobacteria; Acidimicrobiia; Acidimicrobiales; uncultured; uncultured bacterium; uncultured bacterium	0.0	1.0	0.0	0.0	0.0	0.0	0.0	0.0	0.0	0.0	0.0	0.0	0.0	0.0	0.0	0.0	0.0	0.0	0.0	0.0	0.0	0.0	0.0	0.0	87.0	132.0	12.0	28.0
OTU24225450	Bacteria; Chloroflexi; Dehalococcoidia; vadinBA26; uncultured bacterium; uncultured bacterium; uncultured bacterium	0.0	0.0	0.0	0.0	0.0	0.0	0.0	0.0	0.0	0.0	0.0	0.0	0.0	0.0	0.0	0.0	0.0	29.0	39.0	16.0	85.0	82.0	24.0	31.0	0.0	0.0	0.0	0.0
OTU684224457	Bacteria; Acidobacteria; Holophagae; Subgroup 10; ABS-19; uncultured bacterium; uncultured bacterium	0.0	0.0	0.0	0.0	0.0	0.0	0.0	0.0	0.0	0.0	0.0	0.0	0.0	0.0	0.0	0.0	0.0	0.0	0.0	0.0	0.0	0.0	0.0	0.0	296.0	0.0	18.0	173.0
OTU887498583	Bacteria; Planctomycetes; Planctomycetacia; Planctomycetales; Planctomycetaceae; Planctomyces; uncultured bacterium	0.0	0.0	0.0	1.0	64.0	117.0	66.0	140.0	181.0	42.0	154.0	0.0	0.0	0.0	0.0	0.0	0.0	0.0	0.0	0.0	0.0	0.0	0.0	0.0	0.0	0.0	0.0	0.0
OTU795511920	Bacteria; Proteobacteria; Alphaproteobacteria; Rhizobiales; Bradyrhizobiaceae; Rhodoblastus; Ambiguous_taxa	1.0	0.0	1.0	1.0	36.0	48.0	50.0	240.0	307.0	76.0	85.0	0.0	0.0	1.0	0.0	0.0	0.0	0.0	0.0	0.0	0.0	0.0	0.0	0.0	0.0	0.0	0.0	0.0
OTU376907840	Bacteria; Proteobacteria; Deltaproteobacteria; Bdellovibrionales; Bdellovibrionaceae; OM27 clade; uncultured bacterium	0.0	0.0	0.0	0.0	521.0	224.0	7.0	0.0	2.0	4.0	2.0	0.0	0.0	0.0	0.0	0.0	0.0	0.0	0.0	0.0	0.0	0.0	0.0	0.0	0.0	0.0	0.0	0.0
OTU283398942	Bacteria; Deferribacteres; Deferribacteres Incertae Sedis; Unknown Order; Unknown Family; Caldithrix; uncultured bacterium	0.0	0.0	0.0	0.0	0.0	0.0	0.0	0.0	4.0	89.0	126.0	0.0	0.0	0.0	0.0	0.0	0.0	1.0	0.0	2.0	0.0	1.0	0.0	0.0	0.0	0.0	0.0	0.0
OTU338172875	Bacteria; Bacteroidetes; Bacteroidia; Bacteroidales; Rikenellaceae; Blvii28 wastewater-sludge group	0.0	0.0	0.0	0.0	21.0	18.0	7.0	3.0	18.0	11.0	87.0	0.0	0.0	0.0	0.0	0.0	0.0	0.0	0.0	0.0	0.0	0.0	0.0	0.0	0.0	0.0	0.0	0.0
OTU560255894	Bacteria; Firmicutes; Clostridia; Clostridiales; Family XIII; Family XIII UCG-002	37.0	70.0	55.0	38.0	0.0	0.0	0.0	0.0	1.0	0.0	0.0	3.0	8.0	19.0	4.0	12.0	4.0	0.0	0.0	0.0	0.0	0.0	0.0	0.0	0.0	0.0	0.0	0.0
OTU750427925	Bacteria; Chloroflexi; Anaerolineae; Anaerolineales; Anaerolineaceae; uncultured; uncultured Chloroflexi bacterium	0.0	1.0	0.0	0.0	0.0	0.0	0.0	0.0	0.0	0.0	0.0	0.0	0.0	0.0	0.0	0.0	0.0	6.0	9.0	24.0	69.0	301.0	100.0	73.0	0.0	0.0	0.0	0.0
OTU994725583	Bacteria; Proteobacteria; Gammaproteobacteria; Xanthomonadales; Xanthomonadaceae; uncultured; Ambiguous_taxa	0.0	0.0	0.0	0.0	42.0	27.0	59.0	12.0	85.0	25.0	39.0	0.0	0.0	0.0	0.0	0.0	0.0	0.0	0.0	0.0	0.0	0.0	0.0	0.0	0.0	0.0	0.0	0.0
OTU744428230	Bacteria; Chloroflexi; Anaerolineae; Anaerolineales; Anaerolineaceae; uncultured; uncultured bacterium	0.0	0.0	0.0	0.0	0.0	0.0	0.0	5.0	2.0	64.0	62.0	0.0	0.0	0.0	0.0	0.0	0.0	0.0	0.0	0.0	0.0	0.0	0.0	0.0	0.0	0.0	0.0	0.0
OTU305740529	Bacteria; Proteobacteria; Deltaproteobacteria; Desulfobacterales; Desulfobulbaceae	0.0	0.0	0.0	0.0	3.0	5.0	5.0	85.0	22.0	32.0	30.0	0.0	0.0	0.0	0.0	0.0	0.0	0.0	0.0	0.0	0.0	0.0	0.0	0.0	0.0	0.0	0.0	0.0
OTU936537115	Bacteria; Planctomycetes; Phycisphaerae; KCLunmb-38-53; uncultured bacterium; uncultured bacterium; uncultured bacterium	0.0	0.0	0.0	0.0	0.0	0.0	0.0	0.0	0.0	61.0	134.0	0.0	0.0	0.0	0.0	0.0	0.0	0.0	0.0	0.0	0.0	0.0	0.0	0.0	0.0	0.0	0.0	0.0
OTU730659520	Bacteria; Spirochaetae; Spirochaetes; Spirochaetales; Spirochaetaceae; uncultured; uncultured bacterium	0.0	0.0	0.0	0.0	0.0	0.0	0.0	0.0	0.0	0.0	0.0	0.0	0.0	0.0	0.0	0.0	0.0	3.0	8.0	18.0	50.0	49.0	18.0	15.0	0.0	0.0	0.0	0.0
OTU95363607	Bacteria; Proteobacteria; Alphaproteobacteria; Alphaproteobacteria Incertae Sedis; uncultured; uncultured bacterium; uncultured bacterium	0.0	0.0	0.0	0.0	5.0	8.0	13.0	108.0	74.0	6.0	12.0	0.0	0.0	0.0	0.0	0.0	0.0	0.0	0.0	0.0	0.0	0.0	0.0	0.0	0.0	0.0	0.0	0.0
OTU860003414	Bacteria; Proteobacteria; Deltaproteobacteria; Desulfurellales; Desulfurellaceae; H16; uncultured bacterium	0.0	0.0	0.0	0.0	0.0	0.0	0.0	0.0	0.0	0.0	0.0	0.0	0.0	0.0	0.0	0.0	0.0	0.0	0.0	0.0	0.0	0.0	0.0	0.0	33.0	89.0	0.0	0.0
OTU206851432	Bacteria; Verrucomicrobia; Opitutae; Opitutales; Opitutaceae; Opitutus; Ambiguous_taxa	0.0	0.0	0.0	0.0	21.0	31.0	18.0	43.0	42.0	16.0	22.0	0.0	0.0	0.0	0.0	0.0	0.0	0.0	0.0	0.0	5.0	0.0	0.0	0.0	0.0	0.0	0.0	0.0
OTU937276191	Bacteria; Proteobacteria; Gammaproteobacteria; uncultured; uncultured bacterium; uncultured bacterium; uncultured bacterium	1.0	3.0	0.0	17.0	0.0	0.0	0.0	0.0	0.0	0.0	0.0	0.0	0.0	2.0	0.0	93.0	1.0	0.0	0.0	0.0	0.0	1.0	0.0	0.0	0.0	0.0	0.0	1.0
OTU185226006	Bacteria; KSB3 (Modulibacteria); uncultured bacterium; uncultured bacterium; uncultured bacterium; uncultured bacterium; uncultured bacterium	0.0	1.0	1.0	0.0	0.0	0.0	0.0	0.0	0.0	1.0	0.0	0.0	0.0	0.0	0.0	0.0	0.0	51.0	59.0	3.0	0.0	1.0	9.0	2.0	0.0	0.0	0.0	0.0
OTU815364717	Bacteria; Planctomycetes; Planctomycetacia; Planctomycetales; Planctomycetaceae; Planctomyces; uncultured bacterium	0.0	1.0	0.0	3.0	0.0	0.0	0.0	0.0	0.0	1.0	0.0	0.0	0.0	0.0	0.0	7.0	0.0	0.0	0.0	0.0	0.0	0.0	2.0	2.0	27.0	29.0	101.0	109.0
OTU338253187	Bacteria; Chloroflexi; Anaerolineae; Anaerolineales; Anaerolineaceae; uncultured	0.0	0.0	0.0	0.0	11.0	31.0	122.0	481.0	605.0	480.0	525.0	0.0	0.0	0.0	0.0	0.0	0.0	0.0	0.0	0.0	0.0	0.0	0.0	0.0	0.0	0.0	0.0	0.0
OTU298792895	Bacteria; Chloroflexi; Anaerolineae; Anaerolineales; Anaerolineaceae; uncultured; uncultured bacterium	0.0	0.0	0.0	0.0	0.0	0.0	0.0	0.0	0.0	0.0	0.0	0.0	0.0	0.0	0.0	0.0	0.0	0.0	0.0	0.0	0.0	0.0	0.0	0.0	3.0	4.0	0.0	151.0
OTU843153847	Bacteria; RBG-1 (Zixibacteria); uncultured bacterium; uncultured bacterium; uncultured bacterium; uncultured bacterium; uncultured bacterium	0.0	0.0	0.0	0.0	0.0	0.0	0.0	0.0	0.0	0.0	0.0	0.0	0.0	0.0	0.0	0.0	0.0	0.0	0.0	0.0	0.0	0.0	0.0	0.0	136.0	0.0	1.0	0.0
OTU35609950	Unassigned	0.0	0.0	0.0	0.0	0.0	0.0	0.0	0.0	0.0	0.0	0.0	0.0	0.0	0.0	0.0	0.0	0.0	0.0	0.0	0.0	0.0	0.0	2.0	4.0	1303.0	4747.0	300.0	295.0
OTU696336251	Bacteria; Bacteroidetes; Flavobacteriia; Flavobacteriales; Flavobacteriaceae; uncultured; Ambiguous_taxa	211.0	861.0	357.0	280.0	4.0	3.0	0.0	1.0	11.0	0.0	1.0	849.0	510.0	126.0	8.0	139.0	14.0	1.0	3.0	0.0	0.0	0.0	0.0	0.0	0.0	0.0	0.0	0.0
OTU285222833	Bacteria; RBG-1 (Zixibacteria); uncultured bacterium; uncultured bacterium; uncultured bacterium; uncultured bacterium; uncultured bacterium	0.0	0.0	0.0	0.0	0.0	0.0	0.0	5.0	0.0	52.0	95.0	0.0	0.0	0.0	0.0	0.0	0.0	0.0	0.0	3.0	1.0	0.0	1.0	1.0	0.0	0.0	0.0	0.0
OTU680711886	Bacteria; Chlorobi; Chlorobia; Chlorobiales; OPB56; uncultured bacterium; uncultured bacterium	0.0	0.0	0.0	0.0	2.0	1.0	5.0	130.0	15.0	0.0	4.0	0.0	0.0	0.0	0.0	0.0	0.0	0.0	0.0	0.0	0.0	0.0	0.0	0.0	0.0	0.0	0.0	0.0
OTU168739957	Bacteria; Verrucomicrobia; Spartobacteria; Chthoniobacterales; DA101 soil group; uncultured bacterium; uncultured bacterium	8.0	221.0	84.0	59.0	0.0	0.0	0.0	0.0	0.0	0.0	0.0	0.0	1.0	5.0	6.0	78.0	17.0	0.0	1.0	0.0	0.0	0.0	0.0	0.0	0.0	0.0	0.0	0.0
OTU627164536	Bacteria; Chloroflexi; Anaerolineae; Anaerolineales; Anaerolineaceae; uncultured; uncultured organism	0.0	0.0	0.0	0.0	0.0	0.0	0.0	0.0	0.0	0.0	1.0	0.0	0.0	0.0	0.0	1.0	0.0	0.0	0.0	0.0	0.0	0.0	11.0	10.0	545.0	941.0	661.0	882.0
OTU20520043	Bacteria; Planctomycetes; OM190; uncultured bacterium; uncultured bacterium; uncultured bacterium; uncultured bacterium	0.0	0.0	0.0	0.0	0.0	0.0	0.0	0.0	0.0	0.0	0.0	0.0	0.0	0.0	0.0	1.0	0.0	0.0	0.0	0.0	0.0	0.0	10.0	4.0	345.0	103.0	392.0	130.0
OTU121563150	Bacteria; Proteobacteria; Alphaproteobacteria; Rhizobiales; A0839; uncultured bacterium; uncultured bacterium	0.0	1.0	0.0	0.0	0.0	0.0	0.0	0.0	0.0	1.0	0.0	0.0	0.0	1.0	0.0	0.0	0.0	0.0	0.0	0.0	0.0	0.0	1.0	1.0	95.0	48.0	27.0	88.0
OTU512219758	Bacteria; Proteobacteria; Deltaproteobacteria; Syntrophobacterales; Syntrophaceae; Desulfomonile; uncultured bacterium	0.0	0.0	1.0	0.0	0.0	0.0	0.0	0.0	0.0	0.0	0.0	0.0	0.0	0.0	0.0	0.0	0.0	24.0	25.0	25.0	79.0	150.0	46.0	24.0	0.0	0.0	0.0	0.0
OTU783756864	Bacteria; Chloroflexi; Dehalococcoidia	0.0	0.0	2.0	0.0	0.0	0.0	0.0	0.0	0.0	0.0	0.0	0.0	0.0	0.0	0.0	0.0	0.0	16.0	23.0	8.0	45.0	35.0	9.0	6.0	0.0	0.0	0.0	0.0
OTU310070623	Bacteria; Latescibacteria; uncultured bacterium; uncultured bacterium; uncultured bacterium; uncultured bacterium; uncultured bacterium	0.0	0.0	0.0	0.0	0.0	0.0	0.0	0.0	0.0	0.0	0.0	0.0	0.0	0.0	0.0	0.0	0.0	0.0	0.0	0.0	0.0	0.0	0.0	0.0	123.0	24.0	6.0	29.0
OTU440396115	Bacteria; Planctomycetes; OM190; uncultured bacterium; uncultured bacterium; uncultured bacterium; uncultured bacterium	0.0	0.0	0.0	0.0	0.0	0.0	0.0	0.0	0.0	0.0	0.0	0.0	0.0	0.0	0.0	0.0	0.0	0.0	0.0	0.0	0.0	0.0	1.0	0.0	109.0	77.0	39.0	58.0
OTU223887449	Bacteria; Proteobacteria; Betaproteobacteria; Burkholderiales; Comamonadaceae; uncultured; uncultured bacterium	1.0	2.0	2.0	3.0	304.0	350.0	63.0	244.0	332.0	21.0	56.0	0.0	0.0	1.0	1.0	0.0	0.0	0.0	0.0	0.0	7.0	0.0	0.0	0.0	0.0	2.0	0.0	0.0
OTU51786966	Bacteria; Bacteroidetes; Bacteroidia; Bacteroidales; Porphyromonadaceae; uncultured; uncultured bacterium	0.0	0.0	0.0	0.0	9.0	7.0	28.0	47.0	53.0	12.0	33.0	0.0	0.0	0.0	0.0	0.0	0.0	0.0	0.0	0.0	0.0	0.0	0.0	0.0	0.0	0.0	0.0	0.0
OTU84410166	Bacteria; Verrucomicrobia; Spartobacteria; Chthoniobacterales; Chthoniobacteraceae; Chthoniobacter; uncultured bacterium	0.0	0.0	0.0	0.0	43.0	159.0	15.0	7.0	36.0	104.0	173.0	0.0	0.0	0.0	0.0	0.0	0.0	0.0	0.0	0.0	0.0	0.0	0.0	0.0	0.0	0.0	0.0	0.0
OTU668269311	Bacteria; Cyanobacteria; Melainabacteria; Obscuribacterales; Ambiguous_taxa; Ambiguous_taxa; Ambiguous_taxa	0.0	0.0	0.0	0.0	2.0	7.0	37.0	72.0	13.0	75.0	216.0	0.0	0.0	0.0	0.0	0.0	0.0	0.0	0.0	0.0	0.0	0.0	0.0	0.0	0.0	0.0	0.0	0.0
OTU146061028	Bacteria; Planctomycetes; Planctomycetacia; Planctomycetales; Planctomycetaceae; uncultured; uncultured bacterium	0.0	0.0	0.0	0.0	0.0	0.0	0.0	0.0	0.0	0.0	0.0	0.0	0.0	0.0	0.0	0.0	0.0	0.0	0.0	0.0	0.0	0.0	2.0	0.0	16.0	2.0	75.0	109.0
OTU230584538	Bacteria; Acidobacteria; Holophagae; Holophagae Incertae Sedis; Unknown Family; Thermoanaerobaculum	0.0	1.0	0.0	1.0	0.0	0.0	0.0	0.0	0.0	0.0	0.0	0.0	0.0	0.0	0.0	0.0	0.0	8.0	10.0	19.0	117.0	98.0	17.0	14.0	0.0	0.0	0.0	0.0
OTU529774231	Bacteria; Bacteroidetes; Sphingobacteriia; Sphingobacteriales; Lentimicrobiaceae	3.0	31.0	21.0	8.0	1.0	0.0	9.0	66.0	115.0	42.0	24.0	2.0	3.0	0.0	0.0	3.0	0.0	3.0	1.0	0.0	0.0	0.0	0.0	2.0	0.0	0.0	0.0	0.0
OTU659306451	Bacteria; Proteobacteria; Gammaproteobacteria; Xanthomonadales; Xanthomonadales Incertae Sedis; Acidibacter; uncultured bacterium	0.0	0.0	0.0	0.0	0.0	0.0	0.0	0.0	0.0	0.0	3.0	0.0	0.0	0.0	0.0	0.0	0.0	0.0	0.0	0.0	0.0	0.0	0.0	3.0	3.0	0.0	36.0	87.0
OTU381552712	Bacteria; Bacteroidetes; Sphingobacteriia; Sphingobacteriales; Saprospiraceae; uncultured; uncultured bacterium	0.0	0.0	0.0	0.0	266.0	285.0	3.0	45.0	7.0	3.0	7.0	0.0	0.0	0.0	0.0	0.0	0.0	0.0	0.0	0.0	0.0	0.0	0.0	0.0	0.0	0.0	0.0	0.0
OTU574314927	Bacteria; Chlorobi; Chlorobia; Chlorobiales; OPB56; uncultured organism; uncultured organism	0.0	0.0	0.0	0.0	9.0	5.0	17.0	195.0	101.0	3.0	4.0	0.0	0.0	0.0	0.0	0.0	0.0	0.0	0.0	0.0	0.0	0.0	0.0	0.0	0.0	0.0	0.0	0.0
OTU513866830	Bacteria; Bacteroidetes; Sphingobacteriia; Sphingobacteriales; Lentimicrobiaceae; uncultured bacterium; uncultured bacterium	0.0	0.0	0.0	0.0	23.0	28.0	105.0	267.0	1101.0	19.0	65.0	0.0	0.0	0.0	0.0	0.0	0.0	1.0	3.0	0.0	0.0	0.0	0.0	0.0	0.0	0.0	0.0	0.0
OTU596843265	Bacteria; Verrucomicrobia; LD1-PB3; uncultured bacterium; uncultured bacterium; uncultured bacterium; uncultured bacterium	0.0	0.0	0.0	0.0	0.0	1.0	64.0	979.0	439.0	1.0	3.0	0.0	0.0	0.0	0.0	0.0	0.0	0.0	2.0	0.0	0.0	0.0	0.0	0.0	0.0	0.0	0.0	0.0
OTU965137269	Bacteria; Chloroflexi; Anaerolineae; Anaerolineales; Anaerolineaceae; uncultured; uncultured bacterium	0.0	0.0	0.0	0.0	13.0	22.0	396.0	1427.0	2215.0	319.0	498.0	0.0	0.0	0.0	0.0	0.0	0.0	0.0	0.0	0.0	0.0	0.0	0.0	0.0	0.0	0.0	0.0	0.0
OTU11059694	Bacteria; Bacteroidetes; Bacteroidetes BD2-2; uncultured bacterium; uncultured bacterium; uncultured bacterium; uncultured bacterium	0.0	0.0	0.0	0.0	0.0	0.0	0.0	0.0	0.0	0.0	0.0	0.0	0.0	0.0	1.0	0.0	0.0	42.0	24.0	57.0	216.0	189.0	107.0	74.0	0.0	0.0	0.0	0.0
OTU34449874	Bacteria; Proteobacteria; Deltaproteobacteria; Desulfobacterales; Desulfobacteraceae; Desulfonema; uncultured bacterium	0.0	0.0	0.0	0.0	1.0	2.0	5.0	0.0	339.0	3.0	2.0	0.0	0.0	0.0	0.0	0.0	0.0	0.0	0.0	0.0	0.0	0.0	0.0	0.0	0.0	0.0	0.0	0.0
OTU145336404	Bacteria; Cyanobacteria; Melainabacteria; Gastranaerophilales; uncultured bacterium; uncultured bacterium; uncultured bacterium	0.0	0.0	0.0	1.0	1.0	3.0	24.0	101.0	47.0	6.0	6.0	0.0	0.0	0.0	0.0	0.0	0.0	0.0	0.0	0.0	0.0	0.0	0.0	0.0	0.0	0.0	0.0	0.0
OTU512273860	Bacteria; Deferribacteres; Deferribacteres Incertae Sedis; Unknown Order; Unknown Family; Caldithrix; uncultured bacterium	0.0	0.0	2.0	1.0	0.0	0.0	0.0	0.0	0.0	0.0	0.0	0.0	0.0	0.0	0.0	0.0	0.0	42.0	67.0	32.0	96.0	164.0	32.0	23.0	0.0	0.0	0.0	0.0
OTU784932022	Bacteria; Cyanobacteria; Melainabacteria; Gastranaerophilales; uncultured bacterium; uncultured bacterium; uncultured bacterium	0.0	0.0	0.0	0.0	9.0	9.0	28.0	190.0	70.0	13.0	19.0	0.0	0.0	0.0	0.0	0.0	0.0	0.0	0.0	0.0	0.0	0.0	0.0	0.0	0.0	0.0	0.0	0.0
OTU230441258	Bacteria; Proteobacteria; Deltaproteobacteria; Desulfobacterales; Desulfobulbaceae; [Desulfobacterium] catecholicum group; uncultured bacterium	0.0	0.0	0.0	0.0	8.0	8.0	12.0	53.0	149.0	167.0	186.0	0.0	0.0	0.0	0.0	0.0	0.0	0.0	0.0	0.0	0.0	0.0	0.0	0.0	0.0	0.0	0.0	0.0
OTU616276342	Bacteria; Proteobacteria; Alphaproteobacteria; Rhizobiales; Hyphomicrobiaceae; Pedomicrobium; uncultured bacterium	0.0	0.0	0.0	3.0	0.0	0.0	0.0	0.0	0.0	0.0	0.0	0.0	0.0	0.0	0.0	8.0	0.0	0.0	0.0	0.0	0.0	0.0	0.0	1.0	1109.0	997.0	48.0	79.0
OTU612744573	Bacteria; Bacteroidetes; Cytophagia; Cytophagales; Cytophagaceae; uncultured	0.0	0.0	0.0	0.0	0.0	0.0	0.0	0.0	0.0	0.0	0.0	0.0	0.0	0.0	0.0	0.0	0.0	0.0	0.0	0.0	0.0	0.0	0.0	0.0	132.0	0.0	5.0	0.0
OTU719619672	Bacteria; Aminicenantes	0.0	0.0	0.0	0.0	0.0	0.0	0.0	0.0	0.0	0.0	0.0	0.0	0.0	0.0	0.0	0.0	0.0	11.0	7.0	25.0	55.0	48.0	1.0	7.0	0.0	0.0	0.0	0.0
OTU242257064	Bacteria; Chloroflexi; Anaerolineae; Anaerolineales; Anaerolineaceae; uncultured	0.0	0.0	0.0	0.0	15.0	24.0	24.0	0.0	122.0	5.0	1.0	0.0	0.0	0.0	0.0	0.0	0.0	0.0	0.0	0.0	0.0	0.0	0.0	0.0	0.0	0.0	0.0	0.0
OTU410213262	Bacteria; Bacteroidetes; Bacteroidetes vadinHA17	0.0	0.0	0.0	0.0	5.0	8.0	14.0	32.0	20.0	161.0	425.0	0.0	0.0	0.0	0.0	0.0	0.0	2.0	0.0	0.0	0.0	0.0	0.0	0.0	0.0	0.0	0.0	0.0
OTU867573607	Bacteria; Proteobacteria; Alphaproteobacteria; Rhodospirillales; JG37-AG-20; Ambiguous_taxa; Ambiguous_taxa	0.0	0.0	0.0	0.0	0.0	0.0	0.0	0.0	0.0	0.0	0.0	0.0	0.0	0.0	0.0	0.0	0.0	0.0	0.0	0.0	0.0	0.0	4.0	3.0	44.0	44.0	267.0	459.0
OTU514961306	Bacteria; Chloroflexi; uncultured; uncultured bacterium; uncultured bacterium; uncultured bacterium; uncultured bacterium	0.0	0.0	0.0	0.0	0.0	0.0	0.0	0.0	0.0	0.0	0.0	0.0	0.0	0.0	0.0	0.0	0.0	2.0	0.0	8.0	9.0	73.0	16.0	15.0	0.0	0.0	0.0	0.0
OTU751197494	Bacteria; Aminicenantes; uncultured bacterium; uncultured bacterium; uncultured bacterium; uncultured bacterium; uncultured bacterium	0.0	0.0	0.0	0.0	10.0	22.0	33.0	289.0	288.0	73.0	98.0	0.0	0.0	0.0	0.0	0.0	0.0	0.0	0.0	0.0	0.0	0.0	0.0	0.0	0.0	0.0	0.0	0.0
OTU361695395	Bacteria; Planctomycetes; Planctomycetacia; Planctomycetales; Planctomycetaceae; uncultured; uncultured bacterium	0.0	0.0	0.0	0.0	0.0	0.0	0.0	0.0	0.0	0.0	0.0	0.0	0.0	0.0	0.0	0.0	0.0	0.0	0.0	0.0	0.0	0.0	0.0	1.0	191.0	160.0	54.0	93.0
OTU812719526	Bacteria; Planctomycetes; BD7-11; uncultured bacterium; uncultured bacterium; uncultured bacterium; uncultured bacterium	0.0	0.0	0.0	0.0	0.0	0.0	0.0	0.0	0.0	0.0	0.0	0.0	0.0	0.0	0.0	1.0	0.0	0.0	0.0	0.0	0.0	0.0	4.0	0.0	27.0	18.0	87.0	29.0
OTU707686025	Bacteria; Proteobacteria; Alphaproteobacteria; Alphaproteobacteria Incertae Sedis; uncultured	0.0	0.0	0.0	0.0	0.0	0.0	48.0	119.0	119.0	5.0	5.0	0.0	0.0	0.0	0.0	0.0	0.0	0.0	0.0	0.0	0.0	0.0	0.0	0.0	0.0	0.0	0.0	0.0
OTU39253275	Bacteria; Gracilibacteria; uncultured bacterium; uncultured bacterium; uncultured bacterium; uncultured bacterium; uncultured bacterium	0.0	0.0	0.0	0.0	0.0	0.0	0.0	0.0	0.0	418.0	357.0	0.0	0.0	0.0	0.0	0.0	0.0	0.0	0.0	0.0	0.0	0.0	0.0	0.0	0.0	0.0	0.0	0.0
OTU173534826	Bacteria; Planctomycetes; Planctomycetacia; Planctomycetales; Planctomycetaceae; uncultured; uncultured bacterium	0.0	0.0	0.0	0.0	0.0	0.0	0.0	0.0	0.0	0.0	0.0	0.0	0.0	0.0	0.0	0.0	0.0	0.0	0.0	0.0	0.0	0.0	0.0	0.0	39.0	85.0	16.0	51.0
OTU388754658	Bacteria; Proteobacteria; Deltaproteobacteria; Syntrophobacterales; Syntrophaceae; uncultured; Ambiguous_taxa	0.0	0.0	0.0	0.0	0.0	0.0	21.0	75.0	75.0	1.0	3.0	0.0	0.0	0.0	0.0	0.0	0.0	0.0	0.0	0.0	0.0	0.0	0.0	0.0	0.0	0.0	0.0	0.0
OTU406585715	Bacteria; Nitrospirae; Nitrospira; Nitrospirales; Nitrospiraceae; Nitrospira; Ambiguous_taxa	0.0	0.0	0.0	0.0	0.0	0.0	0.0	0.0	0.0	0.0	0.0	0.0	0.0	0.0	0.0	1.0	0.0	0.0	0.0	0.0	0.0	0.0	0.0	0.0	127.0	31.0	9.0	20.0
OTU327555494	Bacteria; Chloroflexi; Anaerolineae; Anaerolineales; Anaerolineaceae; uncultured; uncultured bacterium	0.0	0.0	0.0	0.0	0.0	0.0	0.0	0.0	0.0	0.0	0.0	0.0	0.0	0.0	0.0	0.0	0.0	0.0	0.0	0.0	0.0	0.0	0.0	0.0	106.0	10.0	10.0	3.0
OTU210589949	Bacteria; Acidobacteria; Subgroup 22	0.0	0.0	0.0	0.0	0.0	0.0	0.0	0.0	0.0	0.0	0.0	0.0	0.0	0.0	0.0	0.0	0.0	23.0	9.0	23.0	87.0	62.0	41.0	33.0	0.0	0.0	0.0	0.0
OTU786607697	Bacteria; Parcubacteria; Candidatus Nomurabacteria; uncultured soil bacterium; uncultured soil bacterium; uncultured soil bacterium; uncultured soil bacterium	0.0	1.0	1.0	0.0	0.0	0.0	0.0	0.0	0.0	174.0	73.0	0.0	0.0	0.0	0.0	0.0	0.0	0.0	0.0	0.0	0.0	0.0	0.0	0.0	0.0	0.0	0.0	0.0
OTU469609091	Bacteria; Planctomycetes; OM190; uncultured bacterium; uncultured bacterium; uncultured bacterium; uncultured bacterium	0.0	0.0	0.0	0.0	10.0	34.0	3.0	1.0	2.0	32.0	45.0	0.0	0.0	0.0	0.0	0.0	0.0	0.0	0.0	0.0	0.0	0.0	0.0	0.0	0.0	0.0	0.0	0.0
OTU72698327	Bacteria; Proteobacteria; Alphaproteobacteria; Rhodobacterales; Rhodobacteraceae; Defluviimonas	0.0	1.0	1.0	1.0	2.0	7.0	21.0	48.0	73.0	8.0	24.0	0.0	0.0	0.0	1.0	0.0	0.0	0.0	0.0	0.0	3.0	0.0	0.0	0.0	3.0	0.0	0.0	0.0
OTU645258387	Bacteria; Proteobacteria; Deltaproteobacteria; Desulfarculales; Desulfarculaceae; Desulfatiglans; uncultured delta proteobacterium	0.0	2.0	0.0	0.0	0.0	0.0	0.0	0.0	1.0	0.0	1.0	0.0	0.0	0.0	0.0	0.0	0.0	44.0	43.0	2.0	5.0	1.0	15.0	7.0	0.0	0.0	0.0	0.0
OTU606634017	Bacteria; Bacteroidetes; Sphingobacteriia; Sphingobacteriales; S15A-MN91; uncultured bacterium; uncultured bacterium	0.0	0.0	0.0	0.0	2.0	4.0	32.0	190.0	321.0	0.0	0.0	0.0	0.0	0.0	0.0	0.0	0.0	0.0	0.0	0.0	0.0	0.0	0.0	0.0	0.0	0.0	0.0	0.0
OTU179757745	Bacteria; Peregrinibacteria; uncultured bacterium; uncultured bacterium; uncultured bacterium; uncultured bacterium; uncultured bacterium	0.0	0.0	0.0	0.0	91.0	73.0	3.0	5.0	8.0	2.0	1.0	0.0	0.0	0.0	0.0	0.0	0.0	0.0	0.0	0.0	0.0	0.0	0.0	0.0	0.0	0.0	0.0	0.0
OTU4749639	Bacteria; Chloroflexi; SBR2076; uncultured soil bacterium; uncultured soil bacterium; uncultured soil bacterium; uncultured soil bacterium	0.0	0.0	0.0	0.0	0.0	0.0	0.0	0.0	0.0	0.0	0.0	0.0	0.0	0.0	0.0	0.0	0.0	0.0	0.0	0.0	0.0	0.0	1.0	0.0	310.0	809.0	19.0	49.0
OTU758272645	Unassigned	0.0	0.0	0.0	0.0	0.0	0.0	0.0	0.0	0.0	0.0	0.0	0.0	0.0	0.0	0.0	0.0	1.0	0.0	0.0	0.0	0.0	0.0	3.0	1.0	1458.0	3357.0	87.0	277.0
OTU134139430	Bacteria; Proteobacteria; Alphaproteobacteria; Rhodobacterales; Rhodobacteraceae; Rhodobacter; uncultured bacterium	1.0	0.0	0.0	0.0	14.0	21.0	3.0	25.0	17.0	160.0	157.0	1.0	0.0	1.0	0.0	0.0	0.0	1.0	0.0	0.0	7.0	0.0	0.0	0.0	0.0	0.0	0.0	0.0
OTU917103968	Bacteria; Bacteroidetes; Bacteroidia; Bacteroidales; Porphyromonadaceae; Microbacter	0.0	1.0	0.0	0.0	0.0	1.0	2.0	98.0	11.0	0.0	0.0	0.0	2.0	0.0	0.0	0.0	0.0	0.0	0.0	0.0	0.0	0.0	0.0	0.0	0.0	0.0	0.0	0.0
OTU867227209	Bacteria; Proteobacteria; Deltaproteobacteria; Myxococcales; Haliangiaceae; Haliangium; uncultured bacterium	0.0	0.0	0.0	0.0	0.0	0.0	0.0	0.0	0.0	0.0	0.0	0.0	0.0	0.0	0.0	0.0	0.0	0.0	0.0	0.0	0.0	0.0	0.0	0.0	39.0	50.0	5.0	21.0
OTU451102202	Bacteria; Chloroflexi; Anaerolineae; Anaerolineales; Anaerolineaceae; uncultured; uncultured bacterium	0.0	0.0	1.0	0.0	0.0	0.0	0.0	0.0	0.0	0.0	2.0	0.0	0.0	0.0	0.0	0.0	0.0	15.0	17.0	59.0	126.0	501.0	60.0	31.0	0.0	0.0	0.0	0.0
OTU889643598	Bacteria; Proteobacteria; Gammaproteobacteria; Pseudomonadales; Pseudomonadaceae; Pseudomonas	0.0	1.0	0.0	0.0	0.0	0.0	0.0	0.0	0.0	0.0	0.0	0.0	0.0	5.0	75.0	59.0	13.0	0.0	0.0	0.0	0.0	0.0	0.0	0.0	0.0	0.0	0.0	0.0
OTU510129669	Bacteria; Proteobacteria; Deltaproteobacteria; Myxococcales; Haliangiaceae; Haliangium; uncultured bacterium	0.0	0.0	0.0	0.0	0.0	0.0	0.0	0.0	0.0	0.0	0.0	0.0	0.0	0.0	0.0	0.0	0.0	0.0	0.0	0.0	0.0	0.0	1.0	1.0	0.0	8.0	68.0	50.0
OTU266396198	Bacteria; Proteobacteria; Deltaproteobacteria; Oligoflexales; 0319-6G20; uncultured bacterium; uncultured bacterium	0.0	0.0	0.0	0.0	0.0	0.0	0.0	0.0	0.0	0.0	0.0	0.0	0.0	0.0	0.0	0.0	0.0	0.0	0.0	0.0	0.0	0.0	0.0	1.0	49.0	20.0	36.0	10.0
OTU858413198	Bacteria; Proteobacteria; Alphaproteobacteria; Rhodobacterales; Rhodobacteraceae; uncultured; uncultured bacterium	0.0	0.0	0.0	0.0	0.0	0.0	0.0	0.0	0.0	0.0	1.0	0.0	0.0	0.0	0.0	0.0	0.0	0.0	0.0	0.0	0.0	0.0	0.0	0.0	289.0	223.0	4.0	23.0
OTU50918113	Bacteria; Bacteroidetes; Bacteroidia; Bacteroidales; Porphyromonadaceae; Paludibacter; Ambiguous_taxa	0.0	0.0	0.0	0.0	6.0	5.0	76.0	1231.0	657.0	0.0	0.0	1.0	0.0	0.0	0.0	1.0	0.0	0.0	0.0	0.0	0.0	0.0	0.0	0.0	0.0	0.0	0.0	0.0
OTU501675698	Bacteria; Gemmatimonadetes; BD2-11 terrestrial group; uncultured bacterium; uncultured bacterium; uncultured bacterium; uncultured bacterium	0.0	0.0	0.0	0.0	0.0	0.0	0.0	0.0	0.0	0.0	0.0	0.0	0.0	0.0	0.0	0.0	0.0	0.0	0.0	0.0	0.0	0.0	2.0	0.0	113.0	17.0	19.0	7.0
OTU555553482	Bacteria; Proteobacteria; Alphaproteobacteria; Rhodospirillales; KCM-B-15; uncultured bacterium; uncultured bacterium	0.0	0.0	0.0	0.0	0.0	0.0	0.0	0.0	0.0	0.0	0.0	0.0	0.0	0.0	0.0	0.0	0.0	0.0	0.0	0.0	0.0	0.0	4.0	8.0	33.0	13.0	263.0	90.0
OTU556859975	Bacteria; Proteobacteria; Deltaproteobacteria; Syntrophobacterales; Syntrophaceae; Desulfomonile; uncultured bacterium	0.0	1.0	0.0	0.0	0.0	0.0	0.0	0.0	0.0	0.0	0.0	0.0	0.0	0.0	0.0	0.0	0.0	1.0	12.0	2.0	9.0	57.0	22.0	6.0	0.0	0.0	0.0	0.0
OTU277337732	Bacteria; Proteobacteria; Deltaproteobacteria; NB1-j	0.0	0.0	0.0	0.0	0.0	0.0	0.0	0.0	0.0	0.0	0.0	0.0	0.0	0.0	0.0	0.0	0.0	0.0	0.0	0.0	0.0	0.0	0.0	1.0	58.0	39.0	47.0	60.0
OTU639038918	Bacteria; Acidobacteria; Solibacteres; Solibacterales; Solibacteraceae (Subgroup 3); PAUC26f; uncultured bacterium	0.0	0.0	0.0	0.0	0.0	0.0	0.0	0.0	0.0	0.0	0.0	0.0	0.0	0.0	0.0	0.0	0.0	0.0	0.0	0.0	0.0	0.0	2.0	1.0	199.0	2.0	125.0	100.0
OTU119686247	Bacteria; Proteobacteria; Deltaproteobacteria; Myxococcales; MidBa8	0.0	0.0	0.0	0.0	0.0	0.0	0.0	0.0	0.0	257.0	170.0	0.0	0.0	0.0	0.0	0.0	0.0	0.0	0.0	0.0	0.0	0.0	0.0	0.0	0.0	0.0	0.0	0.0
OTU372929928	Bacteria; Planctomycetes; OM190; uncultured bacterium; uncultured bacterium; uncultured bacterium; uncultured bacterium	0.0	0.0	0.0	0.0	18.0	24.0	30.0	536.0	172.0	0.0	0.0	0.0	0.0	0.0	0.0	0.0	0.0	0.0	0.0	0.0	0.0	0.0	0.0	0.0	0.0	0.0	0.0	0.0
OTU672776711	Bacteria; Proteobacteria; Gammaproteobacteria; Xanthomonadales; Xanthomonadaceae; uncultured; Ambiguous_taxa	0.0	0.0	0.0	0.0	15.0	23.0	16.0	125.0	76.0	76.0	58.0	0.0	0.0	0.0	0.0	0.0	0.0	0.0	0.0	0.0	0.0	0.0	0.0	0.0	0.0	0.0	0.0	0.0
OTU899290505	Bacteria; Proteobacteria; Deltaproteobacteria; NB1-j; Ambiguous_taxa; Ambiguous_taxa; Ambiguous_taxa	0.0	0.0	0.0	0.0	0.0	0.0	0.0	0.0	0.0	1.0	0.0	0.0	0.0	0.0	0.0	3.0	0.0	0.0	0.0	0.0	0.0	0.0	4.0	1.0	7.0	12.0	220.0	84.0
OTU902221326	Bacteria; Proteobacteria; Gammaproteobacteria; Methylococcales; Methylococcaceae; Methylomicrobium	0.0	0.0	0.0	0.0	0.0	0.0	2.0	7.0	0.0	0.0	5.0	0.0	0.0	0.0	0.0	1.0	0.0	0.0	0.0	0.0	0.0	0.0	0.0	0.0	0.0	96.0	13.0	3.0
OTU306392659	Bacteria; Proteobacteria; Deltaproteobacteria; Desulfobacterales; Desulfobacteraceae; Sva0081 sediment group; uncultured bacterium	0.0	1.0	1.0	0.0	0.0	0.0	0.0	0.0	0.0	0.0	0.0	0.0	0.0	0.0	0.0	0.0	0.0	20.0	28.0	50.0	174.0	187.0	119.0	63.0	0.0	0.0	0.0	0.0
OTU480314995	Bacteria; Chloroflexi; Anaerolineae; Anaerolineales; Anaerolineaceae; uncultured; uncultured bacterium	0.0	0.0	0.0	0.0	0.0	0.0	0.0	0.0	0.0	0.0	0.0	0.0	0.0	0.0	0.0	0.0	0.0	20.0	26.0	8.0	93.0	57.0	20.0	18.0	0.0	0.0	0.0	0.0
OTU262870236	Bacteria; Proteobacteria; Betaproteobacteria; Methylophilales; Methylophilaceae; uncultured	0.0	0.0	0.0	0.0	259.0	205.0	76.0	277.0	199.0	86.0	162.0	0.0	0.0	0.0	0.0	0.0	0.0	0.0	0.0	0.0	1.0	0.0	0.0	0.0	0.0	0.0	0.0	0.0
OTU930504476	Bacteria; Proteobacteria; Alphaproteobacteria; Rhodospirillales; JG37-AG-20	0.0	1.0	0.0	0.0	0.0	0.0	0.0	0.0	0.0	0.0	0.0	0.0	0.0	0.0	0.0	0.0	0.0	0.0	0.0	0.0	0.0	0.0	0.0	0.0	59.0	8.0	23.0	22.0
OTU405754464	Bacteria; Cyanobacteria; ML635J-21; uncultured bacterium; uncultured bacterium; uncultured bacterium; uncultured bacterium	0.0	0.0	0.0	0.0	0.0	0.0	7.0	87.0	199.0	1.0	0.0	0.0	0.0	0.0	0.0	0.0	0.0	0.0	1.0	0.0	0.0	0.0	0.0	0.0	0.0	0.0	0.0	0.0
OTU474784427	Bacteria; Spirochaetae; Spirochaetes; Spirochaetales; Leptospiraceae; uncultured; uncultured spirochete	0.0	0.0	0.0	0.0	3.0	22.0	58.0	40.0	73.0	1.0	5.0	0.0	0.0	0.0	0.0	0.0	0.0	0.0	0.0	0.0	0.0	0.0	0.0	0.0	0.0	0.0	0.0	0.0
OTU588527632	Bacteria; Verrucomicrobia; Spartobacteria; Chthoniobacterales; Chthoniobacteraceae; Chthoniobacter; uncultured bacterium	0.0	0.0	0.0	0.0	0.0	0.0	0.0	0.0	0.0	0.0	0.0	0.0	0.0	0.0	0.0	0.0	0.0	0.0	0.0	0.0	0.0	0.0	1.0	0.0	4.0	82.0	43.0	123.0
OTU899649276	Bacteria; Planctomycetes; Planctomycetacia; Planctomycetales; Planctomycetaceae; Blastopirellula	0.0	0.0	0.0	0.0	0.0	0.0	0.0	0.0	0.0	0.0	1.0	0.0	0.0	0.0	0.0	1.0	0.0	0.0	0.0	0.0	0.0	0.0	1.0	0.0	326.0	402.0	91.0	248.0
OTU631933177	Bacteria; Parcubacteria; uncultured bacterium; uncultured bacterium; uncultured bacterium; uncultured bacterium; uncultured bacterium	0.0	0.0	0.0	0.0	2.0	0.0	0.0	6.0	1.0	71.0	120.0	0.0	0.0	0.0	0.0	0.0	0.0	0.0	0.0	0.0	0.0	0.0	0.0	0.0	0.0	0.0	0.0	0.0
OTU316230765	Bacteria; Bacteroidetes; Bacteroidia; Bacteroidales; Porphyromonadaceae; Paludibacter; uncultured bacterium	0.0	0.0	0.0	0.0	0.0	0.0	0.0	136.0	0.0	2.0	8.0	0.0	0.0	0.0	0.0	0.0	0.0	0.0	0.0	0.0	0.0	0.0	0.0	0.0	0.0	0.0	0.0	0.0
OTU576430074	Bacteria; Chloroflexi; SBR2076; uncultured bacterium; uncultured bacterium; uncultured bacterium; uncultured bacterium	0.0	1.0	0.0	0.0	0.0	0.0	0.0	0.0	0.0	0.0	0.0	0.0	0.0	0.0	0.0	0.0	0.0	1.0	5.0	0.0	5.0	5.0	80.0	35.0	0.0	0.0	0.0	0.0
OTU686727179	Archaea; Euryarchaeota; Thermoplasmata; Thermoplasmatales; CCA47; uncultured archaeon; uncultured archaeon	0.0	0.0	0.0	0.0	0.0	0.0	0.0	0.0	0.0	0.0	0.0	0.0	0.0	0.0	0.0	0.0	0.0	3.0	2.0	9.0	51.0	89.0	11.0	13.0	0.0	0.0	0.0	0.0
OTU379456838	Bacteria; Verrucomicrobia; Verrucomicrobiae; Verrucomicrobiales; Verrucomicrobiaceae; Prosthecobacter; uncultured bacterium	0.0	1.0	0.0	0.0	33.0	118.0	42.0	6.0	63.0	46.0	98.0	0.0	0.0	0.0	0.0	0.0	0.0	0.0	0.0	0.0	0.0	0.0	0.0	0.0	0.0	0.0	0.0	0.0
OTU149043247	Bacteria; Parcubacteria; Candidatus Nomurabacteria; uncultured bacterium; uncultured bacterium; uncultured bacterium; uncultured bacterium	0.0	0.0	0.0	0.0	0.0	0.0	16.0	166.0	270.0	1.0	1.0	0.0	0.0	1.0	0.0	0.0	0.0	0.0	0.0	0.0	0.0	0.0	0.0	0.0	0.0	0.0	0.0	0.0
OTU861583618	Bacteria; Proteobacteria; Alphaproteobacteria; Rickettsiales; SM2D12	0.0	0.0	0.0	0.0	1.0	7.0	52.0	113.0	149.0	10.0	12.0	0.0	0.0	0.0	0.0	0.0	0.0	0.0	0.0	0.0	0.0	0.0	0.0	0.0	0.0	0.0	1.0	0.0
OTU74661869	Unassigned	0.0	0.0	0.0	0.0	0.0	0.0	0.0	0.0	0.0	0.0	0.0	0.0	0.0	0.0	0.0	0.0	0.0	0.0	0.0	0.0	0.0	0.0	0.0	0.0	81.0	104.0	0.0	0.0
OTU213016935	Bacteria; Bacteroidetes; Sphingobacteriia; Sphingobacteriales; KD1-131; uncultured bacterium; uncultured bacterium	0.0	0.0	0.0	0.0	0.0	0.0	0.0	0.0	0.0	201.0	33.0	0.0	0.0	0.0	0.0	0.0	0.0	0.0	0.0	0.0	0.0	0.0	0.0	0.0	0.0	0.0	0.0	0.0
OTU627685517	Bacteria; Proteobacteria; Alphaproteobacteria; Rhizobiales; alphaI cluster; Ambiguous_taxa; Ambiguous_taxa	4.0	25.0	7.0	8.0	0.0	0.0	0.0	0.0	0.0	3.0	3.0	0.0	0.0	1.0	1.0	6.0	1.0	0.0	0.0	0.0	0.0	0.0	0.0	0.0	23.0	22.0	3.0	7.0
OTU897403989	Bacteria; Verrucomicrobia; Spartobacteria; Chthoniobacterales; Chthoniobacteraceae; Chthoniobacter	0.0	0.0	0.0	0.0	1.0	6.0	0.0	2.0	1.0	24.0	32.0	0.0	0.0	0.0	0.0	0.0	0.0	0.0	0.0	0.0	0.0	0.0	1.0	0.0	11.0	11.0	32.0	55.0
OTU725187778	Bacteria; Peregrinibacteria; uncultured bacterium; uncultured bacterium; uncultured bacterium; uncultured bacterium; uncultured bacterium	0.0	0.0	1.0	1.0	0.0	0.0	0.0	0.0	0.0	0.0	0.0	0.0	0.0	0.0	0.0	0.0	0.0	7.0	5.0	28.0	136.0	215.0	28.0	11.0	0.0	0.0	0.0	0.0
OTU299482494	Bacteria; Bacteroidetes; Sphingobacteriia; Sphingobacteriales; NS11-12 marine group; uncultured bacterium; uncultured bacterium	0.0	0.0	0.0	0.0	0.0	0.0	0.0	0.0	0.0	0.0	0.0	0.0	0.0	0.0	0.0	0.0	0.0	0.0	0.0	0.0	160.0	0.0	0.0	0.0	49.0	0.0	0.0	2.0
OTU121733508	Bacteria; Proteobacteria; Deltaproteobacteria; Myxococcales; Haliangiaceae; Haliangium; uncultured bacterium	0.0	0.0	0.0	0.0	0.0	0.0	0.0	0.0	0.0	0.0	0.0	0.0	0.0	0.0	0.0	0.0	0.0	0.0	0.0	0.0	0.0	0.0	0.0	0.0	19.0	97.0	55.0	49.0
OTU373207104	Bacteria; Chlorobi; Chlorobia; Chlorobiales; OPB56	0.0	0.0	0.0	0.0	676.0	399.0	13.0	2.0	47.0	12.0	52.0	0.0	0.0	0.0	0.0	0.0	0.0	0.0	0.0	0.0	0.0	0.0	0.0	0.0	0.0	0.0	0.0	0.0
OTU961017626	Bacteria; Proteobacteria; Deltaproteobacteria; Desulfurellales; Desulfurellaceae; H16; Ambiguous_taxa	0.0	0.0	0.0	1.0	0.0	0.0	0.0	0.0	0.0	0.0	0.0	0.0	0.0	0.0	0.0	0.0	0.0	0.0	0.0	0.0	0.0	0.0	3.0	4.0	298.0	385.0	188.0	308.0
OTU715150102	Bacteria; Chloroflexi; Anaerolineae; Anaerolineales; Anaerolineaceae; uncultured	0.0	0.0	0.0	0.0	0.0	0.0	0.0	0.0	0.0	0.0	0.0	0.0	0.0	0.0	0.0	0.0	0.0	0.0	0.0	0.0	0.0	0.0	2.0	3.0	660.0	387.0	81.0	252.0
OTU392153421	Bacteria; Proteobacteria; Deltaproteobacteria; Desulfurellales; Desulfurellaceae; H16; uncultured bacterium	0.0	0.0	0.0	0.0	0.0	0.0	0.0	0.0	0.0	0.0	0.0	0.0	0.0	0.0	0.0	0.0	0.0	0.0	0.0	0.0	0.0	0.0	0.0	0.0	122.0	56.0	32.0	29.0
OTU46678315	Unassigned	0.0	0.0	0.0	0.0	0.0	0.0	0.0	0.0	0.0	0.0	0.0	0.0	0.0	0.0	0.0	0.0	0.0	1.0	1.0	0.0	4.0	4.0	3.0	1.0	86.0	0.0	47.0	25.0
OTU771158521	Bacteria; Proteobacteria; Gammaproteobacteria; Methylococcales; Methylococcaceae; Candidatus Methylospira	0.0	0.0	0.0	0.0	0.0	0.0	0.0	0.0	0.0	26.0	176.0	0.0	0.0	0.0	0.0	0.0	0.0	0.0	0.0	0.0	1.0	0.0	0.0	0.0	0.0	0.0	0.0	0.0
OTU433040509	Bacteria; Verrucomicrobia; Verrucomicrobia Incertae Sedis; Unknown Order; Unknown Family; Candidatus Methylacidiphilum; uncultured bacterium	0.0	0.0	0.0	0.0	0.0	1.0	0.0	11.0	9.0	109.0	89.0	0.0	0.0	0.0	0.0	0.0	0.0	0.0	0.0	0.0	0.0	0.0	0.0	0.0	0.0	0.0	0.0	0.0
OTU594670797	Unassigned	0.0	0.0	0.0	0.0	0.0	0.0	0.0	0.0	0.0	0.0	0.0	0.0	0.0	0.0	0.0	0.0	0.0	23.0	18.0	11.0	28.0	32.0	8.0	11.0	0.0	0.0	0.0	0.0
OTU161666106	Bacteria; Proteobacteria; Gammaproteobacteria; Pseudomonadales; Pseudomonadaceae; Pseudomonas; uncultured bacterium	0.0	1.0	0.0	2.0	0.0	0.0	0.0	0.0	0.0	0.0	0.0	0.0	0.0	0.0	192.0	72.0	52.0	0.0	0.0	0.0	0.0	0.0	0.0	0.0	0.0	0.0	0.0	0.0
OTU586643350	Bacteria; Chloroflexi; Anaerolineae; Anaerolineales; Anaerolineaceae; Pelolinea	0.0	1.0	0.0	0.0	0.0	0.0	0.0	0.0	0.0	0.0	0.0	0.0	0.0	0.0	0.0	0.0	0.0	7.0	12.0	12.0	34.0	28.0	24.0	14.0	0.0	0.0	0.0	0.0
OTU542780225	Bacteria; Firmicutes; Clostridia; Clostridiales; Christensenellaceae; Christensenellaceae R-7 group; uncultured bacterium	1.0	5.0	4.0	1.0	17.0	43.0	127.0	2666.0	1526.0	218.0	261.0	0.0	0.0	1.0	1.0	0.0	0.0	1.0	0.0	0.0	0.0	0.0	0.0	0.0	0.0	0.0	0.0	0.0
OTU318443773	Bacteria; Firmicutes; Clostridia; Clostridiales; Family XII; Acidaminobacter; uncultured bacterium	0.0	0.0	0.0	0.0	11.0	11.0	0.0	116.0	0.0	0.0	0.0	0.0	2.0	0.0	0.0	0.0	0.0	0.0	0.0	0.0	0.0	0.0	0.0	0.0	0.0	0.0	0.0	0.0
OTU337935464	Bacteria; Spirochaetae; Spirochaetes; Spirochaetales; Spirochaetaceae; uncultured; uncultured bacterium	0.0	0.0	0.0	0.0	0.0	0.0	0.0	0.0	0.0	0.0	0.0	0.0	0.0	0.0	0.0	0.0	0.0	11.0	10.0	24.0	61.0	52.0	12.0	11.0	0.0	0.0	0.0	0.0
OTU638851356	Bacteria; Proteobacteria; Deltaproteobacteria; SAR324 clade(Marine group B)	0.0	0.0	0.0	0.0	3.0	13.0	28.0	94.0	340.0	1.0	5.0	0.0	0.0	0.0	0.0	0.0	0.0	0.0	0.0	0.0	0.0	0.0	0.0	0.0	0.0	0.0	0.0	0.0
OTU372070251	Bacteria; Bacteroidetes; Sphingobacteriia; Sphingobacteriales; Saprospiraceae; uncultured; uncultured bacterium	0.0	0.0	0.0	0.0	8.0	22.0	124.0	253.0	1076.0	129.0	50.0	0.0	0.0	0.0	0.0	0.0	0.0	1.0	0.0	0.0	0.0	0.0	0.0	0.0	0.0	0.0	0.0	0.0
OTU415479858	Bacteria; Verrucomicrobia; Opitutae; Opitutales; Opitutaceae; Opitutus	0.0	0.0	0.0	0.0	0.0	0.0	0.0	0.0	0.0	0.0	0.0	0.0	0.0	0.0	0.0	0.0	0.0	0.0	0.0	0.0	0.0	0.0	0.0	1.0	90.0	101.0	29.0	97.0
OTU686947111	Bacteria; Proteobacteria; Deltaproteobacteria; Desulfobacterales; Desulfobulbaceae; Desulfobulbus; Ambiguous_taxa	0.0	0.0	0.0	0.0	2.0	0.0	119.0	260.0	116.0	64.0	91.0	0.0	0.0	0.0	0.0	0.0	0.0	0.0	0.0	0.0	0.0	0.0	0.0	0.0	0.0	0.0	0.0	0.0
OTU299050066	Bacteria; Planctomycetes; Phycisphaerae; Phycisphaerales; Phycisphaeraceae; CL500-3; uncultured bacterium	0.0	0.0	0.0	0.0	86.0	100.0	113.0	733.0	148.0	155.0	248.0	0.0	0.0	0.0	0.0	0.0	0.0	0.0	0.0	0.0	0.0	0.0	0.0	0.0	0.0	0.0	0.0	0.0
OTU406590751	Bacteria; Bacteroidetes; Sphingobacteriia; Sphingobacteriales; uncultured; uncultured bacterium; uncultured bacterium	0.0	0.0	0.0	0.0	0.0	0.0	0.0	0.0	0.0	0.0	0.0	0.0	0.0	0.0	0.0	0.0	0.0	0.0	0.0	0.0	0.0	0.0	0.0	0.0	128.0	0.0	0.0	0.0
OTU608519445	Bacteria; Actinobacteria; Actinobacteria; Corynebacteriales; Mycobacteriaceae; Mycobacterium; uncultured bacterium	5.0	137.0	76.0	97.0	0.0	0.0	0.0	0.0	0.0	0.0	0.0	0.0	0.0	3.0	6.0	64.0	20.0	0.0	0.0	0.0	0.0	0.0	0.0	0.0	15.0	15.0	2.0	8.0
OTU961562651	Bacteria; Proteobacteria; Alphaproteobacteria; Caulobacterales; Hyphomonadaceae; Woodsholea	0.0	0.0	0.0	0.0	0.0	0.0	0.0	0.0	0.0	0.0	0.0	0.0	0.0	0.0	0.0	0.0	0.0	0.0	0.0	0.0	0.0	0.0	0.0	0.0	1.0	2.0	60.0	91.0
OTU992608155	Bacteria; Proteobacteria; Gammaproteobacteria; Xanthomonadales; Xanthomonadaceae; Tahibacter	0.0	0.0	0.0	0.0	573.0	571.0	3.0	18.0	16.0	43.0	98.0	0.0	0.0	0.0	0.0	0.0	0.0	0.0	0.0	0.0	241.0	0.0	0.0	0.0	0.0	0.0	0.0	0.0
OTU611059846	Bacteria; Planctomycetes; Pla4 lineage; uncultured bacterium; uncultured bacterium; uncultured bacterium; uncultured bacterium	0.0	0.0	0.0	0.0	0.0	0.0	0.0	0.0	0.0	0.0	0.0	0.0	0.0	0.0	0.0	0.0	0.0	0.0	0.0	0.0	0.0	0.0	2.0	0.0	172.0	93.0	129.0	149.0
OTU672735402	Bacteria; Planctomycetes; Phycisphaerae; Pla1 lineage; uncultured bacterium; uncultured bacterium; uncultured bacterium	0.0	0.0	0.0	0.0	0.0	2.0	5.0	32.0	13.0	38.0	78.0	0.0	0.0	0.0	0.0	0.0	0.0	0.0	0.0	0.0	0.0	0.0	0.0	0.0	0.0	0.0	0.0	0.0
OTU944622013	Bacteria; Bacteroidetes; Sphingobacteriia; Sphingobacteriales; env.OPS 17; uncultured bacterium; uncultured bacterium	0.0	0.0	0.0	0.0	0.0	0.0	0.0	0.0	0.0	0.0	0.0	0.0	0.0	0.0	0.0	0.0	0.0	0.0	0.0	0.0	0.0	0.0	0.0	0.0	3296.0	0.0	0.0	0.0
OTU896885877	Bacteria; Proteobacteria; Deltaproteobacteria; Desulfobacterales; Desulfobulbaceae; Desulfobulbus	0.0	0.0	0.0	0.0	6.0	7.0	208.0	734.0	358.0	195.0	200.0	0.0	0.0	0.0	0.0	0.0	0.0	0.0	0.0	0.0	0.0	0.0	0.0	0.0	0.0	0.0	0.0	0.0
OTU37294327	Bacteria; Proteobacteria; Alphaproteobacteria; Rhizobiales; Hyphomicrobiaceae; Rhodomicrobium; uncultured bacterium	0.0	0.0	0.0	0.0	0.0	0.0	0.0	0.0	0.0	0.0	1.0	0.0	0.0	0.0	0.0	0.0	0.0	0.0	0.0	0.0	0.0	0.0	0.0	1.0	80.0	39.0	6.0	0.0
OTU275065601	Bacteria; FL0428B-PF49; uncultured bacterium; uncultured bacterium; uncultured bacterium; uncultured bacterium; uncultured bacterium	0.0	0.0	0.0	0.0	0.0	0.0	0.0	0.0	0.0	0.0	0.0	0.0	0.0	0.0	0.0	0.0	0.0	32.0	31.0	15.0	52.0	29.0	8.0	11.0	0.0	0.0	0.0	0.0
OTU313694953	Bacteria; Acidobacteria; Solibacteres; Solibacterales; Solibacteraceae (Subgroup 3); Candidatus Solibacter	0.0	0.0	0.0	0.0	0.0	0.0	0.0	0.0	0.0	0.0	0.0	0.0	0.0	0.0	0.0	5.0	0.0	0.0	0.0	0.0	0.0	0.0	0.0	0.0	56.0	15.0	17.0	30.0
OTU960799267	Bacteria; Spirochaetae; Spirochaetes; Spirochaetales; Spirochaetaceae; Spirochaeta 2; Ambiguous_taxa	0.0	0.0	0.0	0.0	2.0	3.0	0.0	8.0	29.0	43.0	50.0	0.0	0.0	0.0	0.0	0.0	0.0	0.0	0.0	0.0	0.0	0.0	0.0	0.0	0.0	0.0	0.0	0.0
OTU112567956	Bacteria; Bacteroidetes; Sphingobacteriia; Sphingobacteriales; Saprospiraceae; uncultured; Ambiguous_taxa	0.0	0.0	0.0	0.0	0.0	0.0	0.0	0.0	0.0	37.0	80.0	0.0	0.0	0.0	0.0	0.0	0.0	0.0	0.0	0.0	0.0	0.0	0.0	0.0	0.0	0.0	0.0	0.0
OTU724239340	Bacteria; Bacteroidetes; Flavobacteriia; Flavobacteriales; Cryomorphaceae; Crocinitomix; uncultured bacterium	0.0	0.0	0.0	0.0	0.0	0.0	0.0	0.0	0.0	0.0	0.0	0.0	0.0	0.0	0.0	0.0	0.0	0.0	0.0	0.0	0.0	0.0	0.0	0.0	233.0	0.0	3.0	3.0
OTU896430314	Unassigned	0.0	0.0	0.0	0.0	0.0	0.0	0.0	0.0	0.0	0.0	0.0	0.0	0.0	0.0	0.0	2.0	0.0	0.0	0.0	0.0	0.0	0.0	1.0	0.0	1800.0	96.0	22.0	137.0
OTU149296302	Bacteria; Verrucomicrobia; Opitutae; Opitutales; Opitutaceae; Opitutus	0.0	0.0	0.0	0.0	0.0	0.0	0.0	0.0	0.0	0.0	0.0	0.0	0.0	0.0	0.0	0.0	0.0	0.0	0.0	0.0	0.0	0.0	0.0	0.0	2085.0	49.0	22.0	76.0
OTU169154234	Bacteria; Ignavibacteriae; Ignavibacteria; Ignavibacteriales; PHOS-HE36; uncultured bacterium; uncultured bacterium	0.0	0.0	0.0	0.0	2.0	0.0	3.0	106.0	65.0	1.0	5.0	0.0	0.0	0.0	0.0	0.0	0.0	0.0	0.0	0.0	0.0	0.0	0.0	0.0	0.0	0.0	0.0	0.0
OTU542898932	Bacteria; Bacteroidetes; Bacteroidetes VC2.1 Bac22; uncultured bacterium; uncultured bacterium; uncultured bacterium; uncultured bacterium	0.0	0.0	0.0	0.0	0.0	0.0	0.0	0.0	0.0	0.0	0.0	0.0	0.0	0.0	0.0	0.0	0.0	0.0	0.0	0.0	0.0	0.0	0.0	0.0	154.0	3.0	1.0	18.0
OTU99719549	Unassigned	0.0	0.0	0.0	0.0	0.0	1.0	21.0	276.0	72.0	0.0	1.0	0.0	0.0	0.0	0.0	0.0	0.0	0.0	0.0	0.0	0.0	0.0	0.0	0.0	0.0	0.0	0.0	0.0
OTU624431245	Bacteria; Planctomycetes; Phycisphaerae; Phycisphaerales; 08D2Z94 hypersaline microbial mat group	0.0	4.0	3.0	0.0	0.0	0.0	0.0	1.0	0.0	65.0	96.0	0.0	0.0	0.0	0.0	0.0	0.0	0.0	2.0	2.0	0.0	0.0	1.0	0.0	0.0	0.0	0.0	0.0
OTU771348944	Bacteria; Saccharibacteria; uncultured bacterium; uncultured bacterium; uncultured bacterium; uncultured bacterium; uncultured bacterium	0.0	0.0	0.0	0.0	0.0	0.0	0.0	0.0	0.0	0.0	0.0	0.0	0.0	0.0	0.0	0.0	0.0	0.0	0.0	0.0	0.0	0.0	2.0	0.0	165.0	71.0	17.0	136.0
OTU34136689	Bacteria; Proteobacteria; Deltaproteobacteria; Syntrophobacterales; Syntrophaceae; uncultured; Ambiguous_taxa	0.0	0.0	0.0	0.0	0.0	0.0	0.0	0.0	0.0	0.0	0.0	0.0	0.0	0.0	0.0	4.0	0.0	0.0	0.0	0.0	0.0	0.0	2.0	1.0	7.0	0.0	58.0	85.0
OTU746675895	Bacteria; Firmicutes; Bacilli; Bacillales; Bacillaceae; Bacillus; Bacillus cereus	0.0	1.0	0.0	348.0	0.0	0.0	0.0	0.0	0.0	0.0	0.0	0.0	0.0	0.0	0.0	0.0	0.0	0.0	0.0	0.0	0.0	0.0	3.0	4.0	10.0	24.0	1.0	0.0
OTU133743346	Bacteria; Chloroflexi; Anaerolineae; Anaerolineales; Anaerolineaceae; uncultured; uncultured bacterium	0.0	0.0	0.0	0.0	0.0	0.0	0.0	0.0	0.0	0.0	0.0	0.0	0.0	0.0	0.0	0.0	0.0	0.0	0.0	0.0	0.0	0.0	3.0	2.0	294.0	132.0	230.0	635.0
OTU616905832	Bacteria; Proteobacteria; Deltaproteobacteria; Syntrophobacterales; Syntrophobacteraceae; Syntrophobacter	0.0	0.0	1.0	0.0	0.0	0.0	1.0	1.0	1.0	74.0	100.0	0.0	0.0	0.0	0.0	0.0	0.0	0.0	0.0	0.0	0.0	0.0	0.0	0.0	0.0	0.0	0.0	0.0
OTU588712053	Bacteria; Proteobacteria; Deltaproteobacteria; Myxococcales; Haliangiaceae; Haliangium	0.0	1.0	0.0	1.0	2.0	1.0	1.0	0.0	1.0	4.0	117.0	0.0	0.0	0.0	0.0	0.0	0.0	0.0	0.0	0.0	0.0	0.0	0.0	4.0	95.0	68.0	86.0	267.0
OTU195343233	Bacteria; Proteobacteria; Deltaproteobacteria; Syntrophobacterales; Syntrophaceae; Desulfobacca; uncultured delta proteobacterium	0.0	0.0	0.0	0.0	0.0	0.0	0.0	0.0	0.0	1.0	0.0	0.0	0.0	0.0	0.0	0.0	0.0	2.0	3.0	29.0	99.0	78.0	35.0	21.0	0.0	0.0	0.0	0.0
OTU318964534	Bacteria; Verrucomicrobia; OPB35 soil group	0.0	0.0	0.0	0.0	0.0	0.0	0.0	0.0	0.0	0.0	0.0	0.0	0.0	0.0	0.0	0.0	0.0	0.0	0.0	0.0	0.0	0.0	0.0	0.0	403.0	7.0	0.0	13.0
OTU374446067	Bacteria; Spirochaetae; Spirochaetes; Spirochaetales; Spirochaetaceae; Spirochaeta 2; uncultured bacterium	0.0	0.0	0.0	0.0	0.0	0.0	0.0	0.0	0.0	0.0	0.0	0.0	0.0	0.0	0.0	0.0	0.0	14.0	14.0	24.0	126.0	52.0	22.0	6.0	0.0	0.0	0.0	0.0
OTU421696861	Bacteria; Proteobacteria; Epsilonproteobacteria; Campylobacterales; Campylobacteraceae; Arcobacter	242.0	425.0	479.0	434.0	4.0	0.0	0.0	0.0	0.0	0.0	0.0	32.0	16.0	174.0	11.0	107.0	27.0	6.0	13.0	0.0	0.0	0.0	0.0	0.0	0.0	0.0	0.0	0.0
OTU854504978	Bacteria; Proteobacteria; Gammaproteobacteria; KI89A clade; uncultured bacterium; uncultured bacterium; uncultured bacterium	0.0	0.0	0.0	2.0	0.0	0.0	0.0	0.0	0.0	0.0	0.0	0.0	0.0	1.0	0.0	0.0	0.0	0.0	0.0	0.0	0.0	0.0	5.0	0.0	281.0	137.0	168.0	133.0
OTU940526934	Bacteria; Acidobacteria; Subgroup 2; uncultured bacterium; uncultured bacterium; uncultured bacterium; uncultured bacterium	0.0	0.0	0.0	0.0	0.0	0.0	0.0	0.0	0.0	0.0	0.0	0.0	0.0	0.0	0.0	0.0	0.0	0.0	0.0	0.0	0.0	0.0	1.0	2.0	538.0	0.0	88.0	44.0
OTU741829146	Bacteria; Proteobacteria; Alphaproteobacteria; Rhodospirillales; Rhodospirillaceae; Elstera	21.0	9.0	9.0	1.0	34.0	31.0	33.0	105.0	85.0	6.0	23.0	4.0	0.0	9.0	0.0	1.0	0.0	0.0	1.0	1.0	2.0	2.0	0.0	1.0	0.0	0.0	0.0	0.0
OTU476384720	Bacteria; WS2; uncultured bacterium; uncultured bacterium; uncultured bacterium; uncultured bacterium; uncultured bacterium	0.0	0.0	0.0	0.0	0.0	0.0	0.0	1.0	0.0	53.0	57.0	0.0	0.0	0.0	0.0	0.0	0.0	0.0	0.0	0.0	0.0	0.0	0.0	0.0	0.0	0.0	0.0	0.0
OTU386130882	Bacteria; Bacteroidetes; Sphingobacteriia; Sphingobacteriales; Saprospiraceae; uncultured; uncultured bacterium	0.0	0.0	0.0	0.0	0.0	0.0	0.0	0.0	0.0	0.0	0.0	0.0	0.0	0.0	0.0	2.0	0.0	0.0	0.0	0.0	0.0	0.0	8.0	8.0	175.0	884.0	550.0	884.0
OTU324073289	Bacteria; Peregrinibacteria; Candidatus Peribacteria; uncultured bacterium; uncultured bacterium; uncultured bacterium; uncultured bacterium	0.0	0.0	0.0	0.0	0.0	0.0	0.0	0.0	0.0	0.0	0.0	0.0	0.0	0.0	0.0	0.0	0.0	0.0	0.0	0.0	0.0	0.0	0.0	0.0	49.0	73.0	5.0	105.0
OTU338910361	Bacteria; Proteobacteria; Betaproteobacteria; Burkholderiales; Comamonadaceae; Ideonella; uncultured bacterium	5.0	0.0	1.0	0.0	427.0	296.0	112.0	182.0	239.0	22.0	61.0	0.0	0.0	7.0	0.0	0.0	0.0	0.0	0.0	0.0	4.0	2.0	0.0	0.0	0.0	0.0	0.0	0.0
OTU584025520	Bacteria; Proteobacteria; Gammaproteobacteria; Chromatiales; Halothiobacillaceae; Thiovirga; Ambiguous_taxa	31.0	22.0	17.0	11.0	3.0	6.0	1.0	1.0	6.0	0.0	3.0	89.0	82.0	288.0	4.0	14.0	3.0	1.0	1.0	0.0	1.0	3.0	1.0	1.0	0.0	0.0	0.0	0.0
OTU116936464	Bacteria; Chloroflexi; Ardenticatenia; uncultured; uncultured bacterium; uncultured bacterium; uncultured bacterium	0.0	0.0	0.0	0.0	0.0	0.0	0.0	0.0	0.0	0.0	0.0	0.0	0.0	0.0	0.0	0.0	1.0	0.0	0.0	0.0	0.0	0.0	0.0	0.0	99.0	5.0	27.0	104.0
OTU637356377	Bacteria; Gracilibacteria	0.0	2.0	0.0	0.0	5.0	1.0	34.0	155.0	270.0	4.0	6.0	0.0	0.0	1.0	0.0	0.0	0.0	0.0	0.0	0.0	0.0	0.0	0.0	0.0	0.0	0.0	0.0	0.0
OTU419802864	Bacteria; Chloroflexi; SBR2076; Ambiguous_taxa; Ambiguous_taxa; Ambiguous_taxa; Ambiguous_taxa	0.0	4.0	0.0	2.0	0.0	0.0	0.0	0.0	0.0	4.0	1.0	0.0	0.0	0.0	0.0	0.0	0.0	28.0	49.0	8.0	18.0	7.0	29.0	24.0	0.0	0.0	0.0	0.0
OTU716599421	Bacteria; Ignavibacteriae; Ignavibacteria; Ignavibacteriales; LD-RB-34; uncultured bacterium; uncultured bacterium	0.0	1.0	1.0	1.0	1.0	0.0	0.0	0.0	0.0	25.0	13.0	0.0	0.0	0.0	0.0	0.0	0.0	13.0	19.0	7.0	15.0	2.0	22.0	12.0	0.0	0.0	0.0	0.0
OTU695702202	Bacteria; Nitrospirae; Nitrospira; Nitrospirales; Nitrospiraceae; uncultured; uncultured bacterium	2.0	9.0	4.0	5.0	0.0	0.0	0.0	0.0	0.0	0.0	0.0	0.0	0.0	3.0	0.0	0.0	0.0	52.0	77.0	36.0	50.0	18.0	60.0	40.0	0.0	0.0	0.0	0.0
OTU437056319	Bacteria; Proteobacteria; Deltaproteobacteria; Myxococcales; bacteriap25; uncultured bacterium; uncultured bacterium	0.0	0.0	0.0	0.0	0.0	0.0	0.0	0.0	0.0	0.0	0.0	0.0	0.0	0.0	0.0	2.0	0.0	0.0	0.0	0.0	0.0	0.0	0.0	0.0	284.0	65.0	8.0	22.0
OTU345187084	Bacteria; Proteobacteria; Deltaproteobacteria; NB1-j; uncultured bacterium; uncultured bacterium; uncultured bacterium	0.0	0.0	1.0	0.0	0.0	0.0	0.0	0.0	0.0	0.0	0.0	0.0	0.0	0.0	0.0	3.0	0.0	0.0	0.0	0.0	0.0	0.0	0.0	1.0	272.0	125.0	88.0	99.0
OTU999243510	Bacteria; Proteobacteria; Alphaproteobacteria; Rhizobiales; Hyphomicrobiaceae; Rhodomicrobium; uncultured bacterium	0.0	0.0	0.0	0.0	0.0	0.0	0.0	1.0	0.0	7.0	17.0	0.0	0.0	0.0	0.0	0.0	0.0	0.0	0.0	0.0	0.0	0.0	0.0	0.0	53.0	46.0	34.0	41.0
OTU185991707	Bacteria; Proteobacteria; Deltaproteobacteria; Myxococcales; VHS-B3-70; uncultured bacterium; uncultured bacterium	0.0	0.0	1.0	0.0	15.0	5.0	18.0	0.0	67.0	43.0	97.0	0.0	0.0	0.0	0.0	0.0	0.0	1.0	2.0	0.0	0.0	0.0	0.0	0.0	0.0	0.0	0.0	0.0
OTU392174065	Bacteria; Bacteroidetes; Sphingobacteriia; Sphingobacteriales; Saprospiraceae; Haliscomenobacter; Ambiguous_taxa	0.0	0.0	0.0	0.0	539.0	389.0	73.0	759.0	806.0	52.0	165.0	0.0	0.0	0.0	0.0	0.0	0.0	0.0	0.0	0.0	3.0	0.0	0.0	0.0	0.0	0.0	0.0	0.0
OTU432313070	Archaea; Thaumarchaeota; AK59; uncultured archaeon; uncultured archaeon; uncultured archaeon; uncultured archaeon	0.0	0.0	0.0	1.0	0.0	0.0	0.0	0.0	0.0	0.0	0.0	0.0	0.0	0.0	0.0	0.0	0.0	6.0	13.0	5.0	39.0	67.0	24.0	46.0	0.0	0.0	0.0	0.0
OTU600881632	Bacteria; Gemmatimonadetes; Gemmatimonadetes; Gemmatimonadales; Gemmatimonadaceae; uncultured; uncultured bacterium	0.0	0.0	0.0	0.0	0.0	0.0	0.0	0.0	0.0	0.0	0.0	0.0	0.0	0.0	0.0	0.0	0.0	0.0	0.0	0.0	0.0	0.0	2.0	0.0	195.0	109.0	14.0	0.0
OTU765664976	Bacteria; Planctomycetes; OM190; uncultured bacterium; uncultured bacterium; uncultured bacterium; uncultured bacterium	0.0	0.0	0.0	0.0	0.0	0.0	0.0	0.0	0.0	0.0	0.0	0.0	0.0	0.0	0.0	0.0	0.0	0.0	0.0	0.0	0.0	0.0	0.0	0.0	322.0	2.0	20.0	17.0
OTU299149851	Bacteria; Proteobacteria; Epsilonproteobacteria; Campylobacterales; Helicobacteraceae; uncultured; Ambiguous_taxa	1.0	3.0	5.0	2.0	30.0	37.0	6.0	8.0	89.0	5.0	6.0	2.0	1.0	3.0	3.0	3.0	0.0	0.0	1.0	0.0	0.0	0.0	0.0	0.0	0.0	1.0	0.0	0.0
OTU566449548	Bacteria; Elusimicrobia; Elusimicrobia; Lineage IIb	0.0	0.0	0.0	0.0	0.0	0.0	0.0	0.0	0.0	0.0	0.0	0.0	0.0	0.0	0.0	0.0	0.0	0.0	0.0	0.0	0.0	0.0	0.0	0.0	128.0	50.0	28.0	22.0
OTU378822468	Bacteria; SR1 (Absconditabacteria); uncultured candidate division SR1 bacterium; uncultured candidate division SR1 bacterium; uncultured candidate division SR1 bacterium; uncultured candidate division SR1 bacterium; uncultured candidate division SR1 bacterium	0.0	0.0	1.0	0.0	1.0	1.0	3.0	72.0	27.0	44.0	9.0	0.0	0.0	0.0	0.0	0.0	0.0	0.0	0.0	0.0	0.0	0.0	0.0	0.0	0.0	0.0	0.0	0.0
OTU674352485	Bacteria; Bacteroidetes; Sphingobacteriia; Sphingobacteriales; Lentimicrobiaceae; uncultured organism; uncultured organism	0.0	0.0	0.0	0.0	10.0	20.0	15.0	30.0	120.0	5.0	2.0	0.0	0.0	0.0	0.0	0.0	0.0	0.0	0.0	0.0	0.0	0.0	0.0	0.0	0.0	0.0	0.0	0.0
OTU940625731	Bacteria; Firmicutes; Clostridia; Clostridiales; Family XII; Acidaminobacter; uncultured bacterium	0.0	2.0	1.0	0.0	3.0	9.0	0.0	500.0	0.0	1.0	0.0	3.0	479.0	0.0	0.0	1.0	1.0	1.0	0.0	0.0	6.0	0.0	76.0	43.0	0.0	0.0	0.0	0.0
OTU253187835	Bacteria; Parcubacteria; Candidatus Falkowbacteria; uncultured Parcubacteria group bacterium; uncultured Parcubacteria group bacterium; uncultured Parcubacteria group bacterium; uncultured Parcubacteria group bacterium	0.0	0.0	0.0	0.0	0.0	0.0	49.0	20.0	71.0	0.0	0.0	0.0	0.0	0.0	0.0	0.0	0.0	0.0	0.0	0.0	0.0	0.0	0.0	0.0	0.0	0.0	0.0	0.0
OTU458035769	Bacteria; Omnitrophica; uncultured bacterium; uncultured bacterium; uncultured bacterium; uncultured bacterium; uncultured bacterium	0.0	0.0	0.0	0.0	0.0	0.0	0.0	0.0	0.0	0.0	0.0	0.0	0.0	0.0	0.0	0.0	0.0	36.0	20.0	43.0	160.0	121.0	15.0	17.0	0.0	0.0	0.0	0.0
OTU861313351	Unassigned	0.0	0.0	0.0	0.0	0.0	0.0	0.0	0.0	0.0	0.0	0.0	0.0	0.0	0.0	0.0	0.0	0.0	0.0	0.0	1.0	9.0	0.0	82.0	65.0	0.0	0.0	0.0	0.0
OTU297709834	Bacteria; Gracilibacteria; uncultured organism; uncultured organism; uncultured organism; uncultured organism; uncultured organism	0.0	0.0	0.0	0.0	0.0	0.0	18.0	106.0	192.0	3.0	5.0	0.0	0.0	0.0	0.0	0.0	0.0	0.0	0.0	0.0	0.0	0.0	0.0	0.0	0.0	0.0	0.0	0.0
OTU583823115	Bacteria; Bacteroidetes; Sphingobacteriia; Sphingobacteriales; Lentimicrobiaceae; uncultured bacterium; uncultured bacterium	0.0	0.0	1.0	1.0	3.0	13.0	40.0	123.0	196.0	34.0	11.0	0.0	0.0	0.0	0.0	0.0	0.0	1.0	2.0	0.0	0.0	0.0	0.0	0.0	0.0	0.0	0.0	0.0
OTU204371527	Bacteria; Acidobacteria; Blastocatellia; Blastocatellales; Blastocatellaceae (Subgroup 4); 11-24; Ambiguous_taxa	0.0	0.0	0.0	0.0	0.0	0.0	0.0	0.0	0.0	0.0	0.0	0.0	0.0	0.0	0.0	0.0	0.0	0.0	0.0	0.0	0.0	0.0	0.0	0.0	86.0	0.0	0.0	132.0
OTU619832003	Bacteria; Verrucomicrobia; OPB35 soil group; uncultured bacterium; uncultured bacterium; uncultured bacterium; uncultured bacterium	0.0	0.0	0.0	0.0	0.0	0.0	0.0	0.0	0.0	0.0	0.0	0.0	0.0	0.0	0.0	0.0	0.0	0.0	0.0	0.0	0.0	0.0	0.0	2.0	165.0	66.0	149.0	168.0
OTU61697591	Bacteria; Proteobacteria; Gammaproteobacteria; Chromatiales; Chromatiaceae; Rheinheimera; Ambiguous_taxa	0.0	91.0	22.0	1.0	0.0	0.0	0.0	0.0	0.0	3.0	5.0	0.0	1.0	108.0	0.0	0.0	0.0	14.0	21.0	4.0	322.0	2.0	406.0	458.0	0.0	0.0	0.0	0.0
OTU668853640	Unassigned	0.0	0.0	1.0	0.0	5.0	7.0	8.0	12.0	64.0	4.0	16.0	0.0	0.0	0.0	0.0	0.0	0.0	0.0	0.0	0.0	0.0	0.0	0.0	0.0	0.0	0.0	0.0	0.0
OTU119520864	Bacteria; Proteobacteria; Deltaproteobacteria; NB1-j; Ambiguous_taxa; Ambiguous_taxa; Ambiguous_taxa	0.0	0.0	0.0	0.0	0.0	0.0	0.0	4.0	0.0	0.0	0.0	0.0	0.0	0.0	0.0	1.0	0.0	0.0	0.0	0.0	0.0	0.0	3.0	6.0	17.0	43.0	216.0	79.0
OTU330120306	Bacteria; Chloroflexi; Anaerolineae; Anaerolineales; Anaerolineaceae; uncultured; uncultured Chloroflexi bacterium	2.0	5.0	6.0	1.0	0.0	0.0	0.0	0.0	0.0	0.0	0.0	0.0	0.0	1.0	0.0	0.0	0.0	42.0	41.0	2.0	0.0	1.0	49.0	28.0	0.0	0.0	0.0	0.0
OTU327314836	Bacteria; Chloroflexi; Anaerolineae; Anaerolineales; Anaerolineaceae; uncultured; uncultured bacterium	0.0	0.0	0.0	0.0	0.0	0.0	0.0	0.0	0.0	0.0	0.0	0.0	0.0	0.0	0.0	0.0	0.0	6.0	6.0	15.0	69.0	125.0	35.0	29.0	0.0	0.0	0.0	0.0
OTU253271957	Bacteria; Verrucomicrobia; Verrucomicrobia Incertae Sedis; Unknown Order; Unknown Family; Candidatus Methylacidiphilum; uncultured Verrucomicrobia bacterium	0.0	0.0	0.0	0.0	0.0	1.0	11.0	4.0	7.0	8.0	1.0	0.0	0.0	0.0	0.0	0.0	0.0	0.0	0.0	0.0	0.0	0.0	1.0	0.0	40.0	43.0	5.0	70.0
OTU489584408	Unassigned	0.0	0.0	0.0	0.0	1.0	0.0	10.0	63.0	62.0	3.0	9.0	0.0	0.0	0.0	0.0	0.0	0.0	0.0	0.0	0.0	0.0	0.0	0.0	0.0	0.0	0.0	0.0	0.0
OTU114189436	Bacteria; Proteobacteria; Alphaproteobacteria; Alphaproteobacteria Incertae Sedis; uncultured; uncultured bacterium; uncultured bacterium	0.0	2.0	0.0	0.0	54.0	47.0	28.0	1392.0	1068.0	197.0	248.0	0.0	0.0	0.0	0.0	0.0	0.0	0.0	0.0	0.0	0.0	0.0	0.0	0.0	0.0	0.0	0.0	0.0
OTU323537195	Bacteria; Parcubacteria; Candidatus Magasanikbacteria	0.0	0.0	0.0	0.0	0.0	0.0	0.0	0.0	0.0	160.0	260.0	0.0	0.0	0.0	0.0	0.0	0.0	0.0	0.0	0.0	0.0	0.0	0.0	0.0	0.0	0.0	0.0	0.0
OTU435402310	Archaea; Woesearchaeota (DHVEG-6); uncultured archaeon; uncultured archaeon; uncultured archaeon; uncultured archaeon; uncultured archaeon	0.0	0.0	0.0	0.0	0.0	1.0	13.0	61.0	68.0	3.0	3.0	0.0	0.0	0.0	0.0	0.0	0.0	0.0	0.0	0.0	0.0	0.0	0.0	0.0	0.0	0.0	0.0	0.0
OTU900141994	Bacteria; Proteobacteria; Gammaproteobacteria; Thiotrichales; Thiotrichaceae; Thiothrix	2.0	6.0	7.0	2.0	55.0	71.0	21.0	181.0	163.0	46.0	33.0	1.0	0.0	1.0	0.0	0.0	0.0	0.0	3.0	1.0	5.0	0.0	0.0	0.0	0.0	0.0	0.0	0.0
OTU213525114	Bacteria; Proteobacteria; Deltaproteobacteria; Desulfurellales; Desulfurellaceae; H16; Ambiguous_taxa	0.0	0.0	0.0	0.0	0.0	0.0	0.0	0.0	0.0	0.0	0.0	0.0	0.0	0.0	0.0	0.0	0.0	0.0	0.0	0.0	0.0	0.0	1.0	1.0	229.0	443.0	36.0	46.0
OTU557910482	Bacteria; Nitrospirae; Nitrospira; Nitrospirales; 0319-6A21; uncultured bacterium; uncultured bacterium	0.0	0.0	0.0	0.0	0.0	0.0	0.0	0.0	0.0	0.0	0.0	0.0	0.0	0.0	0.0	4.0	0.0	0.0	0.0	0.0	0.0	0.0	0.0	2.0	63.0	11.0	14.0	31.0
OTU770404245	Unassigned	0.0	0.0	0.0	0.0	0.0	0.0	0.0	0.0	0.0	0.0	0.0	0.0	0.0	0.0	0.0	0.0	0.0	3.0	1.0	12.0	43.0	95.0	8.0	6.0	0.0	0.0	0.0	0.0
OTU612172521	Bacteria; Spirochaetae; Spirochaetes; Spirochaetales; Spirochaetaceae; Spirochaeta 2; uncultured bacterium	0.0	4.0	0.0	1.0	0.0	0.0	0.0	0.0	0.0	0.0	0.0	0.0	0.0	0.0	0.0	0.0	0.0	20.0	12.0	9.0	27.0	49.0	24.0	19.0	0.0	0.0	0.0	0.0
OTU46666859	Bacteria; Proteobacteria; Deltaproteobacteria; Myxococcales; Nannocystaceae; uncultured; uncultured delta proteobacterium	0.0	0.0	0.0	0.0	0.0	0.0	0.0	0.0	0.0	0.0	0.0	0.0	0.0	0.0	0.0	0.0	0.0	0.0	0.0	0.0	0.0	0.0	0.0	0.0	114.0	199.0	0.0	1.0
OTU411645273	Bacteria; Bacteroidetes; Bacteroidetes vadinHA17; uncultured bacterium; uncultured bacterium; uncultured bacterium; uncultured bacterium	0.0	1.0	0.0	0.0	0.0	0.0	0.0	0.0	0.0	0.0	0.0	0.0	0.0	0.0	1.0	0.0	0.0	6.0	2.0	7.0	57.0	30.0	56.0	23.0	0.0	0.0	0.0	0.0
OTU723662084	Bacteria; Acidobacteria; Subgroup 17	0.0	1.0	0.0	0.0	0.0	0.0	0.0	0.0	0.0	0.0	0.0	0.0	0.0	0.0	0.0	1.0	0.0	0.0	0.0	0.0	0.0	0.0	1.0	1.0	127.0	213.0	15.0	7.0
OTU179594692	Unassigned	0.0	0.0	0.0	0.0	0.0	0.0	0.0	0.0	0.0	0.0	0.0	0.0	0.0	0.0	0.0	0.0	0.0	1.0	0.0	6.0	39.0	68.0	7.0	4.0	0.0	0.0	0.0	0.0
OTU340425767	Bacteria; Proteobacteria; Deltaproteobacteria; NB1-j; uncultured bacterium; uncultured bacterium; uncultured bacterium	0.0	0.0	0.0	0.0	0.0	0.0	0.0	0.0	0.0	1.0	0.0	0.0	0.0	0.0	0.0	1.0	0.0	0.0	0.0	0.0	0.0	0.0	1.0	1.0	33.0	70.0	57.0	101.0
OTU818485826	Bacteria; Proteobacteria; Alphaproteobacteria; Rhodospirillales; Rhodospirillaceae; uncultured; Lacibacterium sp. UR7-11	0.0	0.0	0.0	0.0	1.0	1.0	0.0	0.0	0.0	18.0	125.0	0.0	0.0	0.0	0.0	0.0	0.0	0.0	0.0	0.0	0.0	0.0	0.0	0.0	1.0	0.0	0.0	0.0
OTU385698649	Bacteria; Spirochaetae; Spirochaetes; Spirochaetales; Spirochaetaceae; uncultured; uncultured organism	0.0	0.0	0.0	0.0	1.0	1.0	3.0	62.0	48.0	0.0	0.0	0.0	0.0	0.0	0.0	0.0	0.0	0.0	0.0	0.0	0.0	0.0	0.0	0.0	0.0	0.0	0.0	0.0
OTU224014935	Bacteria; Nitrospirae; Nitrospira; Nitrospirales; 0319-6A21; uncultured bacterium; uncultured bacterium	0.0	1.0	0.0	0.0	0.0	0.0	0.0	0.0	0.0	0.0	0.0	0.0	0.0	0.0	0.0	0.0	0.0	0.0	0.0	0.0	0.0	0.0	1.0	0.0	67.0	47.0	70.0	103.0
OTU244834805	Bacteria; Firmicutes; Bacilli; Bacillales; Bacillaceae; Bacillus	0.0	6.0	1.0	123.0	0.0	0.0	0.0	0.0	0.0	0.0	0.0	0.0	0.0	1.0	0.0	3.0	0.0	0.0	0.0	3.0	0.0	8.0	39.0	50.0	38.0	40.0	10.0	13.0
OTU36947621	Bacteria; BRC1; uncultured bacterium; uncultured bacterium; uncultured bacterium; uncultured bacterium; uncultured bacterium	0.0	0.0	0.0	0.0	0.0	0.0	0.0	0.0	0.0	29.0	84.0	0.0	0.0	0.0	0.0	0.0	0.0	0.0	0.0	0.0	0.0	0.0	0.0	0.0	0.0	0.0	0.0	0.0
OTU616979230	Bacteria; Saccharibacteria; uncultured bacterium; uncultured bacterium; uncultured bacterium; uncultured bacterium; uncultured bacterium	0.0	1.0	3.0	0.0	0.0	0.0	26.0	32.0	74.0	6.0	10.0	0.0	0.0	0.0	0.0	0.0	0.0	0.0	0.0	0.0	0.0	0.0	0.0	0.0	0.0	0.0	0.0	0.0
OTU902703595	Bacteria; Chloroflexi; Anaerolineae; Anaerolineales; Anaerolineaceae; uncultured; uncultured bacterium	0.0	0.0	0.0	0.0	1.0	1.0	5.0	92.0	73.0	42.0	74.0	0.0	0.0	0.0	0.0	0.0	0.0	0.0	0.0	0.0	0.0	0.0	0.0	0.0	0.0	0.0	0.0	0.0
OTU592458138	Bacteria; Proteobacteria; Betaproteobacteria; Nitrosomonadales; Nitrosomonadaceae; uncultured	0.0	0.0	0.0	0.0	0.0	0.0	0.0	0.0	0.0	0.0	0.0	0.0	0.0	0.0	0.0	0.0	0.0	0.0	0.0	0.0	0.0	0.0	1.0	0.0	151.0	80.0	136.0	115.0
OTU716981644	Unassigned	0.0	0.0	0.0	0.0	0.0	0.0	0.0	0.0	0.0	0.0	0.0	0.0	0.0	0.0	0.0	0.0	0.0	0.0	0.0	0.0	0.0	0.0	2.0	0.0	90.0	35.0	24.0	47.0
OTU43478624	Bacteria; Proteobacteria; Alphaproteobacteria; Rhodospirillales; Rhodospirillaceae; uncultured; uncultured bacterium	1.0	1.0	0.0	1.0	0.0	0.0	0.0	2.0	0.0	0.0	5.0	0.0	0.0	1.0	0.0	0.0	0.0	0.0	0.0	0.0	0.0	0.0	0.0	0.0	178.0	4.0	31.0	59.0
OTU497157405	Bacteria; Planctomycetes; OM190; uncultured bacterium; uncultured bacterium; uncultured bacterium; uncultured bacterium	0.0	0.0	0.0	0.0	0.0	0.0	0.0	0.0	0.0	0.0	0.0	0.0	0.0	0.0	0.0	0.0	0.0	0.0	0.0	0.0	0.0	0.0	3.0	0.0	20.0	4.0	95.0	83.0
OTU473508670	Bacteria; Bacteroidetes; WCHB1-32	0.0	0.0	0.0	0.0	0.0	0.0	1.0	109.0	76.0	58.0	83.0	0.0	0.0	0.0	0.0	0.0	0.0	0.0	0.0	0.0	0.0	0.0	0.0	0.0	0.0	0.0	0.0	0.0
OTU484872430	Bacteria; Chlorobi; Chlorobia; Chlorobiales; OPB56; Ambiguous_taxa; Ambiguous_taxa	0.0	0.0	0.0	0.0	14.0	17.0	62.0	623.0	525.0	5.0	14.0	0.0	0.0	0.0	0.0	0.0	0.0	0.0	0.0	0.0	0.0	0.0	0.0	0.0	0.0	0.0	0.0	0.0
OTU343784141	Bacteria; Proteobacteria; Alphaproteobacteria; Alphaproteobacteria Incertae Sedis; Unknown Family; uncultured	0.0	0.0	0.0	0.0	3.0	4.0	46.0	316.0	299.0	1.0	6.0	0.0	0.0	0.0	0.0	0.0	0.0	0.0	0.0	0.0	0.0	0.0	0.0	0.0	0.0	0.0	0.0	0.0
OTU921369620	Bacteria; Spirochaetae; Spirochaetes; Spirochaetales; Spirochaetaceae; Spirochaeta 2	0.0	0.0	0.0	0.0	168.0	133.0	42.0	100.0	223.0	0.0	0.0	0.0	0.0	0.0	0.0	0.0	0.0	0.0	0.0	0.0	0.0	0.0	0.0	0.0	0.0	0.0	0.0	0.0
OTU829962407	Bacteria; Deferribacteres; Deferribacteres Incertae Sedis; Unknown Order; Unknown Family; Caldithrix; uncultured bacterium	0.0	0.0	0.0	0.0	0.0	0.0	0.0	0.0	0.0	0.0	0.0	0.0	0.0	0.0	0.0	0.0	0.0	9.0	11.0	49.0	134.0	220.0	49.0	43.0	0.0	0.0	0.0	0.0
OTU174967067	Bacteria; Bacteroidetes; Bacteroidia; Bacteroidales; Rikenellaceae; Blvii28 wastewater-sludge group; uncultured bacterium	0.0	0.0	0.0	0.0	0.0	0.0	0.0	1.0	0.0	106.0	66.0	0.0	0.0	0.0	0.0	0.0	0.0	0.0	0.0	0.0	0.0	0.0	0.0	0.0	0.0	0.0	0.0	0.0
OTU969195303	Unassigned	7.0	3.0	4.0	3.0	2.0	10.0	67.0	1108.0	123.0	96.0	81.0	0.0	2.0	12.0	0.0	0.0	0.0	0.0	2.0	0.0	0.0	0.0	0.0	0.0	0.0	0.0	0.0	0.0
OTU87786447	Bacteria; Bacteroidetes; SM1A07; uncultured Bacteroidetes bacterium; uncultured Bacteroidetes bacterium; uncultured Bacteroidetes bacterium; uncultured Bacteroidetes bacterium	0.0	0.0	0.0	0.0	13.0	23.0	17.0	34.0	160.0	1.0	0.0	0.0	0.0	0.0	0.0	0.0	0.0	0.0	0.0	0.0	0.0	0.0	0.0	0.0	0.0	0.0	0.0	0.0
OTU466130102	Bacteria; Chloroflexi; Anaerolineae; Anaerolineales; Anaerolineaceae; uncultured; uncultured bacterium	0.0	0.0	0.0	0.0	129.0	141.0	34.0	218.0	727.0	170.0	192.0	0.0	0.0	0.0	0.0	0.0	0.0	0.0	0.0	0.0	0.0	0.0	2.0	3.0	413.0	422.0	123.0	154.0
OTU892167788	Bacteria; Proteobacteria; Gammaproteobacteria; Xanthomonadales; Xanthomonadaceae; Lysobacter; Ambiguous_taxa	0.0	5.0	0.0	0.0	59.0	45.0	114.0	104.0	261.0	18.0	16.0	0.0	0.0	0.0	0.0	0.0	0.0	0.0	0.0	0.0	0.0	0.0	0.0	0.0	0.0	5.0	0.0	0.0
OTU404110354	Bacteria; Verrucomicrobia; OPB35 soil group; uncultured bacterium; uncultured bacterium; uncultured bacterium; uncultured bacterium	0.0	0.0	0.0	0.0	0.0	0.0	0.0	0.0	0.0	7.0	26.0	0.0	0.0	0.0	0.0	0.0	0.0	0.0	0.0	0.0	0.0	0.0	3.0	0.0	229.0	44.0	98.0	231.0
OTU253321828	Bacteria; Proteobacteria; Deltaproteobacteria; Myxococcales; Haliangiaceae; Haliangium; uncultured bacterium	0.0	0.0	0.0	0.0	0.0	0.0	0.0	0.0	0.0	0.0	0.0	0.0	0.0	0.0	0.0	0.0	0.0	0.0	0.0	0.0	0.0	0.0	0.0	0.0	107.0	16.0	24.0	45.0
OTU964555673	Bacteria; Proteobacteria; Deltaproteobacteria; Desulfarculales; Desulfarculaceae; Desulfatiglans; uncultured bacterium	0.0	0.0	0.0	0.0	0.0	0.0	0.0	0.0	0.0	0.0	0.0	0.0	0.0	0.0	0.0	0.0	0.0	14.0	15.0	19.0	36.0	16.0	17.0	12.0	0.0	0.0	0.0	0.0
OTU808638847	Unassigned	0.0	0.0	0.0	0.0	0.0	0.0	0.0	0.0	0.0	152.0	214.0	0.0	0.0	0.0	0.0	0.0	0.0	0.0	0.0	0.0	0.0	0.0	0.0	0.0	0.0	0.0	0.0	0.0
OTU706029942	Bacteria; Bacteroidetes; Flavobacteriia; Flavobacteriales; Flavobacteriaceae; Flavobacterium	1.0	2.0	2.0	2.0	5.0	6.0	10.0	13.0	46.0	2.0	4.0	0.0	0.0	28.0	2.0	0.0	0.0	0.0	0.0	3.0	95.0	2.0	0.0	0.0	0.0	0.0	0.0	0.0
OTU882538161	Bacteria; Proteobacteria; Alphaproteobacteria; Alphaproteobacteria Incertae Sedis; Unknown Family; Eilatimonas; uncultured bacterium	0.0	0.0	0.0	0.0	0.0	0.0	107.0	5.0	15.0	0.0	0.0	0.0	0.0	0.0	0.0	0.0	0.0	0.0	0.0	0.0	0.0	0.0	0.0	0.0	0.0	0.0	0.0	0.0
OTU867977817	Bacteria; Omnitrophica; uncultured bacterium; uncultured bacterium; uncultured bacterium; uncultured bacterium; uncultured bacterium	0.0	0.0	0.0	0.0	0.0	0.0	0.0	0.0	0.0	0.0	0.0	0.0	0.0	0.0	0.0	0.0	0.0	2.0	11.0	5.0	32.0	87.0	11.0	7.0	0.0	0.0	0.0	0.0
OTU573018476	Bacteria; Planctomycetes; OM190; uncultured bacterium; uncultured bacterium; uncultured bacterium; uncultured bacterium	0.0	0.0	0.0	0.0	0.0	0.0	0.0	0.0	0.0	0.0	0.0	0.0	0.0	0.0	0.0	1.0	0.0	0.0	0.0	0.0	0.0	0.0	2.0	3.0	2.0	0.0	101.0	33.0
OTU483964973	Bacteria; Proteobacteria; Betaproteobacteria; Burkholderiales; Oxalobacteraceae; Noviherbaspirillum	2.0	0.0	0.0	0.0	0.0	0.0	10.0	5.0	106.0	0.0	2.0	0.0	0.0	1.0	0.0	1.0	0.0	0.0	0.0	0.0	1.0	3.0	3.0	6.0	0.0	4.0	0.0	0.0
OTU69630558	Bacteria; Elusimicrobia; Elusimicrobia; Lineage I; Unknown Family; Candidatus Endomicrobium	0.0	0.0	0.0	0.0	0.0	3.0	2.0	54.0	45.0	4.0	3.0	0.0	0.0	0.0	0.0	0.0	0.0	0.0	0.0	0.0	0.0	0.0	0.0	0.0	0.0	0.0	0.0	0.0
OTU864068616	Bacteria; Proteobacteria; Alphaproteobacteria; Rhodospirillales	0.0	0.0	0.0	0.0	46.0	77.0	1.0	0.0	3.0	0.0	0.0	0.0	0.0	0.0	0.0	0.0	0.0	0.0	0.0	0.0	0.0	0.0	0.0	0.0	0.0	0.0	0.0	0.0
OTU508402912	Bacteria; Bacteroidetes; Sphingobacteriia; Sphingobacteriales; env.OPS 17; uncultured bacterium; uncultured bacterium	3.0	0.0	0.0	0.0	2029.0	2081.0	148.0	1205.0	1254.0	39.0	199.0	0.0	0.0	1.0	0.0	0.0	0.0	0.0	0.0	0.0	25.0	0.0	0.0	0.0	0.0	0.0	0.0	0.0
OTU404270949	Bacteria; Chloroflexi; Anaerolineae; Anaerolineales; Anaerolineaceae; uncultured; uncultured Chloroflexi bacterium	0.0	0.0	0.0	0.0	0.0	0.0	0.0	0.0	0.0	0.0	0.0	0.0	0.0	0.0	0.0	0.0	0.0	0.0	0.0	0.0	0.0	0.0	6.0	6.0	116.0	41.0	199.0	353.0
OTU186797490	Bacteria; Spirochaetae; Spirochaetes; Spirochaetales; Leptospiraceae; uncultured	0.0	0.0	0.0	0.0	2.0	7.0	1.0	532.0	0.0	33.0	13.0	0.0	0.0	0.0	0.0	0.0	0.0	0.0	0.0	0.0	0.0	0.0	0.0	0.0	0.0	0.0	0.0	0.0
OTU996366804	Bacteria; Planctomycetes; Planctomycetacia; Planctomycetales; Planctomycetaceae; Gemmata; Ambiguous_taxa	0.0	0.0	0.0	0.0	0.0	0.0	0.0	0.0	0.0	0.0	0.0	0.0	0.0	0.0	0.0	0.0	0.0	0.0	0.0	0.0	0.0	0.0	2.0	5.0	0.0	3.0	94.0	80.0
OTU423468181	Bacteria; Proteobacteria; Gammaproteobacteria; Thiotrichales; Thiotrichaceae; Methylohalomonas	0.0	0.0	0.0	0.0	3.0	4.0	11.0	218.0	54.0	3.0	10.0	0.0	0.0	0.0	0.0	0.0	0.0	0.0	0.0	0.0	0.0	0.0	0.0	0.0	0.0	0.0	0.0	0.0
OTU600633761	Bacteria; Proteobacteria; Alphaproteobacteria; Rhizobiales; Hyphomicrobiaceae; Devosia	0.0	0.0	0.0	0.0	0.0	1.0	1.0	33.0	30.0	149.0	156.0	0.0	0.0	0.0	0.0	0.0	0.0	0.0	0.0	0.0	0.0	0.0	0.0	0.0	0.0	0.0	0.0	0.0
OTU717403907	Bacteria; Proteobacteria; Betaproteobacteria; Methylophilales; Methylophilaceae; uncultured; uncultured bacterium	0.0	0.0	0.0	0.0	192.0	176.0	93.0	140.0	131.0	21.0	52.0	0.0	0.0	0.0	0.0	0.0	0.0	0.0	0.0	0.0	0.0	0.0	4.0	2.0	1.0	35.0	149.0	255.0
OTU963139452	Bacteria; Proteobacteria; Alphaproteobacteria; Rhodospirillales; Rhodospirillaceae; Dongia; Ambiguous_taxa	0.0	0.0	0.0	0.0	54.0	53.0	20.0	43.0	34.0	39.0	78.0	0.0	0.0	0.0	0.0	0.0	0.0	0.0	0.0	0.0	5.0	0.0	0.0	0.0	0.0	0.0	1.0	4.0
OTU390523523	Bacteria; Proteobacteria; Alphaproteobacteria; Rhodospirillales; Rhodospirillaceae; uncultured; uncultured bacterium	0.0	0.0	0.0	0.0	6.0	1.0	24.0	56.0	51.0	8.0	6.0	0.0	0.0	0.0	0.0	0.0	0.0	0.0	0.0	0.0	0.0	0.0	0.0	0.0	0.0	0.0	0.0	0.0
OTU469677207	Bacteria; Verrucomicrobia; OPB35 soil group; uncultured bacterium; uncultured bacterium; uncultured bacterium; uncultured bacterium	0.0	0.0	0.0	0.0	0.0	0.0	14.0	194.0	83.0	0.0	5.0	0.0	0.0	0.0	0.0	0.0	0.0	0.0	0.0	0.0	0.0	0.0	0.0	0.0	0.0	0.0	0.0	0.0
OTU134852831	Bacteria; Gemmatimonadetes; S0134 terrestrial group; uncultured bacterium; uncultured bacterium; uncultured bacterium; uncultured bacterium	0.0	0.0	0.0	0.0	0.0	0.0	0.0	0.0	0.0	0.0	0.0	0.0	0.0	0.0	0.0	1.0	0.0	0.0	0.0	0.0	0.0	0.0	3.0	1.0	148.0	21.0	149.0	161.0
OTU326623366	Bacteria; Chloroflexi; Anaerolineae; Anaerolineales; Anaerolineaceae; uncultured; uncultured bacterium	0.0	0.0	1.0	0.0	1.0	0.0	0.0	3.0	2.0	92.0	75.0	0.0	0.0	0.0	0.0	0.0	0.0	4.0	4.0	0.0	12.0	26.0	13.0	7.0	0.0	0.0	0.0	0.0
OTU553580979	Bacteria; Proteobacteria; Deltaproteobacteria; Desulfobacterales; Desulfobacteraceae	0.0	0.0	0.0	0.0	1.0	3.0	9.0	18.0	55.0	124.0	85.0	0.0	0.0	0.0	0.0	0.0	1.0	0.0	0.0	0.0	2.0	0.0	0.0	0.0	0.0	0.0	0.0	0.0
OTU633514786	Bacteria; Saccharibacteria; uncultured bacterium; uncultured bacterium; uncultured bacterium; uncultured bacterium; uncultured bacterium	0.0	0.0	0.0	0.0	2.0	0.0	45.0	158.0	164.0	2.0	0.0	0.0	0.0	0.0	0.0	0.0	0.0	0.0	0.0	0.0	0.0	0.0	0.0	0.0	0.0	0.0	0.0	0.0
OTU373866494	Bacteria; Acidobacteria; Subgroup 22; uncultured bacterium; uncultured bacterium; uncultured bacterium; uncultured bacterium	0.0	0.0	0.0	0.0	0.0	0.0	0.0	0.0	0.0	0.0	0.0	0.0	0.0	0.0	0.0	0.0	0.0	0.0	0.0	0.0	0.0	0.0	0.0	0.0	118.0	0.0	2.0	10.0
OTU668657714	Bacteria; Proteobacteria; Deltaproteobacteria; NB1-j; Ambiguous_taxa; Ambiguous_taxa; Ambiguous_taxa	0.0	0.0	0.0	0.0	0.0	0.0	0.0	0.0	0.0	0.0	0.0	0.0	0.0	0.0	0.0	2.0	0.0	0.0	0.0	0.0	0.0	0.0	0.0	0.0	66.0	108.0	37.0	135.0
OTU852067286	Bacteria; Proteobacteria; Deltaproteobacteria; Myxococcales; Polyangiaceae; Sorangium; uncultured bacterium	0.0	0.0	0.0	0.0	477.0	753.0	0.0	9.0	3.0	2.0	8.0	0.0	0.0	0.0	0.0	0.0	0.0	0.0	0.0	0.0	0.0	0.0	0.0	0.0	0.0	0.0	0.0	0.0
OTU350778286	Bacteria; Verrucomicrobia; OPB35 soil group; uncultured bacterium; uncultured bacterium; uncultured bacterium; uncultured bacterium	0.0	0.0	0.0	0.0	0.0	0.0	0.0	0.0	0.0	0.0	0.0	0.0	0.0	0.0	0.0	0.0	0.0	0.0	0.0	0.0	0.0	0.0	0.0	0.0	63.0	52.0	16.0	103.0
OTU170909642	Bacteria; Planctomycetes; Phycisphaerae; CCM11a; uncultured Planctomycetia bacterium; uncultured Planctomycetia bacterium; uncultured Planctomycetia bacterium	0.0	0.0	0.0	0.0	0.0	0.0	0.0	0.0	0.0	0.0	0.0	0.0	0.0	0.0	0.0	0.0	0.0	0.0	0.0	0.0	0.0	0.0	1.0	0.0	304.0	2.0	15.0	23.0
OTU270807898	Bacteria; Planctomycetes; Planctomycetacia; Planctomycetales; Planctomycetaceae; uncultured; uncultured bacterium	0.0	0.0	0.0	0.0	0.0	0.0	0.0	0.0	0.0	0.0	0.0	0.0	0.0	0.0	0.0	0.0	0.0	0.0	0.0	0.0	0.0	0.0	3.0	1.0	78.0	99.0	140.0	180.0
OTU199413563	Unassigned	0.0	0.0	0.0	0.0	0.0	0.0	0.0	0.0	0.0	81.0	39.0	0.0	0.0	0.0	0.0	0.0	0.0	0.0	0.0	0.0	0.0	0.0	0.0	0.0	0.0	0.0	0.0	0.0
OTU414631669	Bacteria; Omnitrophica; uncultured bacterium; uncultured bacterium; uncultured bacterium; uncultured bacterium; uncultured bacterium	0.0	0.0	0.0	0.0	0.0	0.0	0.0	0.0	0.0	0.0	0.0	0.0	0.0	0.0	0.0	0.0	0.0	1.0	9.0	45.0	197.0	185.0	35.0	29.0	0.0	0.0	0.0	0.0
OTU796994391	Bacteria; Proteobacteria; Alphaproteobacteria; Rickettsiales; SM1B06; uncultured bacterium; uncultured bacterium	0.0	0.0	0.0	0.0	2.0	4.0	9.0	69.0	96.0	1.0	5.0	0.0	0.0	0.0	0.0	0.0	0.0	0.0	0.0	0.0	0.0	0.0	0.0	0.0	0.0	0.0	0.0	0.0
OTU242467424	Bacteria; Firmicutes; Clostridia; Clostridiales; Ruminococcaceae; Ruminiclostridium 1; uncultured bacterium	0.0	1.0	0.0	0.0	0.0	1.0	9.0	105.0	230.0	88.0	101.0	0.0	0.0	0.0	0.0	0.0	0.0	1.0	0.0	0.0	0.0	0.0	0.0	0.0	49.0	16.0	0.0	0.0
OTU649866734	Bacteria; Bacteroidetes; Cytophagia; Cytophagales; Cytophagaceae; uncultured; uncultured bacterium	0.0	0.0	0.0	0.0	0.0	0.0	0.0	0.0	0.0	0.0	0.0	0.0	0.0	0.0	0.0	0.0	0.0	0.0	0.0	0.0	0.0	0.0	1.0	0.0	2182.0	220.0	15.0	11.0
OTU20659952	Bacteria; Firmicutes; Clostridia; Clostridiales; Family XII; Acidaminobacter	0.0	0.0	0.0	0.0	85.0	73.0	0.0	26.0	3.0	2.0	5.0	0.0	0.0	0.0	0.0	0.0	0.0	0.0	0.0	0.0	0.0	0.0	0.0	0.0	0.0	0.0	0.0	0.0
OTU897227063	Bacteria; Omnitrophica; uncultured Omnitrophica bacterium; uncultured Omnitrophica bacterium; uncultured Omnitrophica bacterium; uncultured Omnitrophica bacterium; uncultured Omnitrophica bacterium	0.0	0.0	0.0	0.0	0.0	0.0	0.0	0.0	0.0	0.0	0.0	0.0	0.0	0.0	0.0	0.0	0.0	9.0	3.0	8.0	28.0	95.0	11.0	17.0	0.0	0.0	0.0	0.0
OTU253214597	Bacteria; Proteobacteria; Deltaproteobacteria; Bdellovibrionales; Bdellovibrionaceae; OM27 clade; uncultured bacterium	0.0	0.0	0.0	0.0	0.0	0.0	0.0	0.0	0.0	0.0	0.0	0.0	0.0	0.0	0.0	0.0	0.0	0.0	0.0	0.0	0.0	0.0	0.0	1.0	48.0	61.0	23.0	12.0
OTU618654834	Bacteria; Spirochaetae; Spirochaetes; Spirochaetales; Spirochaetaceae; uncultured	0.0	0.0	0.0	0.0	0.0	0.0	0.0	0.0	0.0	0.0	0.0	0.0	0.0	0.0	0.0	0.0	0.0	29.0	31.0	27.0	60.0	68.0	17.0	18.0	0.0	0.0	0.0	0.0
OTU454136596	Bacteria; Nitrospinae; MD2898-B26; uncultured bacterium; uncultured bacterium; uncultured bacterium; uncultured bacterium	0.0	0.0	0.0	0.0	1.0	0.0	3.0	73.0	12.0	5.0	16.0	0.0	0.0	0.0	0.0	0.0	0.0	0.0	0.0	0.0	0.0	0.0	0.0	0.0	0.0	0.0	0.0	0.0
OTU209156237	Bacteria; Planctomycetes; Phycisphaerae; Phycisphaerales; Phycisphaeraceae; AKYG587; uncultured bacterium	0.0	0.0	0.0	0.0	0.0	0.0	0.0	0.0	0.0	0.0	0.0	0.0	0.0	0.0	0.0	0.0	0.0	0.0	0.0	0.0	0.0	0.0	0.0	0.0	291.0	194.0	1.0	7.0
OTU630952896	Bacteria; Cloacimonetes; LNR A2-18	0.0	0.0	1.0	0.0	1.0	0.0	1.0	151.0	47.0	0.0	0.0	0.0	0.0	0.0	0.0	0.0	0.0	0.0	0.0	0.0	0.0	0.0	0.0	0.0	0.0	0.0	0.0	0.0
OTU296372201	Bacteria; Chloroflexi; Anaerolineae; Anaerolineales; Anaerolineaceae; uncultured; uncultured Chloroflexi bacterium	0.0	0.0	0.0	0.0	0.0	0.0	0.0	0.0	0.0	0.0	0.0	0.0	0.0	0.0	0.0	0.0	0.0	0.0	0.0	0.0	0.0	0.0	0.0	0.0	97.0	76.0	4.0	99.0
OTU281491145	Bacteria; Planctomycetes; Phycisphaerae; Phycisphaerales; Phycisphaeraceae; SM1A02; uncultured bacterium	0.0	0.0	0.0	0.0	0.0	0.0	0.0	0.0	0.0	0.0	0.0	0.0	0.0	0.0	0.0	4.0	0.0	0.0	0.0	0.0	0.0	0.0	23.0	16.0	22.0	2.0	1370.0	654.0
OTU382271824	Bacteria; Planctomycetes; Phycisphaerae; Tepidisphaerales; Tepidisphaeraceae; uncultured bacterium; uncultured bacterium	0.0	0.0	0.0	0.0	0.0	0.0	0.0	0.0	0.0	0.0	0.0	0.0	0.0	0.0	0.0	0.0	0.0	0.0	0.0	0.0	0.0	0.0	4.0	1.0	85.0	78.0	61.0	33.0
OTU901299286	Bacteria; Proteobacteria; Deltaproteobacteria; 43F-1404R; uncultured bacterium; uncultured bacterium; uncultured bacterium	0.0	0.0	0.0	0.0	0.0	0.0	0.0	0.0	0.0	0.0	0.0	0.0	0.0	0.0	0.0	0.0	0.0	0.0	0.0	0.0	0.0	0.0	0.0	0.0	186.0	7.0	7.0	48.0
OTU991562035	Bacteria; Chloroflexi; Anaerolineae; Anaerolineales; Anaerolineaceae; uncultured; uncultured bacterium	0.0	0.0	0.0	0.0	0.0	0.0	0.0	0.0	0.0	0.0	0.0	0.0	0.0	0.0	0.0	0.0	0.0	28.0	45.0	13.0	94.0	153.0	52.0	26.0	0.0	0.0	0.0	0.0
OTU443800638	Unassigned	0.0	0.0	0.0	0.0	0.0	0.0	0.0	0.0	0.0	0.0	0.0	0.0	0.0	0.0	0.0	0.0	0.0	0.0	0.0	0.0	0.0	0.0	0.0	3.0	25.0	118.0	98.0	104.0
OTU799418265	Bacteria; Proteobacteria; Deltaproteobacteria; Myxococcales; MidBa8	0.0	0.0	0.0	0.0	0.0	0.0	0.0	0.0	0.0	0.0	0.0	0.0	0.0	0.0	0.0	0.0	0.0	9.0	13.0	22.0	7.0	82.0	6.0	6.0	0.0	0.0	0.0	0.0
OTU957405489	Bacteria; Cloacimonetes; MSBL8; uncultured bacterium; uncultured bacterium; uncultured bacterium; uncultured bacterium	0.0	0.0	0.0	0.0	0.0	0.0	8.0	61.0	32.0	4.0	5.0	0.0	0.0	0.0	0.0	0.0	0.0	0.0	0.0	0.0	0.0	0.0	0.0	0.0	0.0	0.0	0.0	0.0
OTU882212260	Bacteria; Bacteroidetes; Bacteroidetes VC2.1 Bac22	0.0	0.0	1.0	0.0	35.0	22.0	23.0	59.0	195.0	10.0	11.0	2.0	4.0	0.0	0.0	0.0	0.0	0.0	0.0	0.0	0.0	0.0	0.0	0.0	0.0	0.0	0.0	0.0
OTU928838537	Bacteria; Bacteroidetes; Flavobacteriia; Flavobacteriales; Cryomorphaceae; Crocinitomix	0.0	0.0	0.0	0.0	0.0	0.0	0.0	0.0	0.0	0.0	0.0	0.0	0.0	0.0	0.0	0.0	0.0	0.0	0.0	0.0	0.0	0.0	0.0	0.0	46.0	153.0	10.0	29.0
OTU947218519	Bacteria; Parcubacteria; Candidatus Nomurabacteria; uncultured bacterium; uncultured bacterium; uncultured bacterium; uncultured bacterium	0.0	0.0	0.0	0.0	0.0	0.0	0.0	26.0	1.0	41.0	53.0	0.0	0.0	0.0	0.0	0.0	0.0	0.0	0.0	0.0	0.0	0.0	0.0	0.0	0.0	0.0	0.0	0.0
OTU441115918	Bacteria; Acidobacteria; Acidobacteria; Acidobacteriales; Acidobacteriaceae (Subgroup 1); uncultured; uncultured bacterium	0.0	0.0	0.0	0.0	0.0	0.0	0.0	0.0	0.0	0.0	0.0	0.0	0.0	0.0	0.0	0.0	0.0	0.0	0.0	0.0	0.0	0.0	0.0	0.0	2.0	0.0	15.0	98.0
OTU719294260	Unassigned	0.0	0.0	0.0	0.0	0.0	0.0	0.0	0.0	0.0	0.0	0.0	0.0	0.0	0.0	0.0	0.0	0.0	0.0	0.0	0.0	0.0	0.0	5.0	4.0	120.0	170.0	214.0	30.0
OTU172243693	Unassigned	0.0	0.0	0.0	0.0	0.0	0.0	0.0	0.0	0.0	0.0	0.0	0.0	0.0	0.0	0.0	0.0	0.0	0.0	0.0	0.0	0.0	0.0	9.0	7.0	49.0	48.0	399.0	295.0
OTU273547249	Unassigned	0.0	0.0	0.0	0.0	16.0	35.0	150.0	308.0	260.0	0.0	0.0	0.0	0.0	0.0	0.0	0.0	0.0	0.0	0.0	0.0	0.0	0.0	0.0	0.0	0.0	0.0	0.0	0.0
OTU546314929	Bacteria; Proteobacteria; Deltaproteobacteria; Myxococcales; Polyangiaceae; uncultured; uncultured bacterium	0.0	0.0	0.0	0.0	0.0	0.0	0.0	0.0	0.0	0.0	0.0	0.0	0.0	0.0	0.0	0.0	0.0	0.0	0.0	0.0	0.0	0.0	0.0	1.0	40.0	51.0	48.0	32.0
OTU530242993	Bacteria; Spirochaetae; Spirochaetes; Spirochaetales; Spirochaetaceae; Spirochaeta 2; uncultured bacterium	0.0	0.0	0.0	0.0	0.0	0.0	0.0	0.0	0.0	0.0	0.0	0.0	0.0	0.0	0.0	0.0	0.0	8.0	9.0	20.0	72.0	111.0	42.0	22.0	0.0	0.0	0.0	0.0
OTU944772457	Bacteria; Proteobacteria; Alphaproteobacteria; Alphaproteobacteria Incertae Sedis; uncultured; uncultured bacterium; uncultured bacterium	0.0	0.0	0.0	0.0	0.0	0.0	0.0	0.0	0.0	0.0	0.0	0.0	0.0	0.0	0.0	0.0	0.0	0.0	0.0	0.0	0.0	0.0	0.0	0.0	122.0	13.0	0.0	0.0
OTU232145043	Bacteria; Proteobacteria; Epsilonproteobacteria; Campylobacterales; Campylobacteraceae; Arcobacter; Ambiguous_taxa	42.0	121.0	146.0	117.0	0.0	0.0	0.0	0.0	0.0	0.0	0.0	0.0	0.0	3.0	1.0	21.0	4.0	0.0	0.0	0.0	0.0	0.0	0.0	0.0	0.0	0.0	0.0	0.0
OTU696146611	Bacteria; Proteobacteria; Deltaproteobacteria; Desulfobacterales; Desulfobacteraceae; SEEP-SRB1; Ambiguous_taxa	0.0	0.0	0.0	0.0	0.0	0.0	2.0	1.0	2.0	112.0	107.0	0.0	0.0	0.0	0.0	0.0	0.0	0.0	0.0	0.0	0.0	0.0	0.0	0.0	0.0	0.0	0.0	0.0
OTU930243221	Bacteria; Proteobacteria; Deltaproteobacteria; Myxococcales; Nannocystaceae; Nannocystis; uncultured bacterium	0.0	0.0	0.0	0.0	14.0	63.0	4.0	8.0	39.0	20.0	92.0	0.0	0.0	0.0	0.0	0.0	0.0	0.0	0.0	0.0	0.0	0.0	0.0	0.0	0.0	0.0	1.0	1.0
OTU349860769	Bacteria; Armatimonadetes; Fimbriimonadia; Fimbriimonadales; Fimbriimonadaceae; uncultured bacterium; uncultured bacterium	0.0	0.0	0.0	0.0	0.0	0.0	0.0	0.0	0.0	0.0	0.0	0.0	0.0	0.0	0.0	0.0	0.0	0.0	0.0	0.0	0.0	0.0	0.0	1.0	88.0	95.0	60.0	59.0
OTU322855778	Bacteria; Proteobacteria; Epsilonproteobacteria; Campylobacterales; Helicobacteraceae; uncultured; Ambiguous_taxa	0.0	1.0	3.0	0.0	72.0	60.0	113.0	1692.0	1327.0	50.0	86.0	0.0	0.0	0.0	0.0	0.0	0.0	0.0	0.0	0.0	0.0	0.0	0.0	0.0	0.0	0.0	0.0	0.0
OTU277439855	Bacteria; Ignavibacteriae; Ignavibacteria; Ignavibacteriales; SR-FBR-L83; uncultured bacterium; uncultured bacterium	0.0	0.0	0.0	0.0	4.0	1.0	21.0	8.0	57.0	29.0	40.0	0.0	0.0	0.0	0.0	0.0	0.0	0.0	0.0	0.0	0.0	0.0	0.0	0.0	0.0	0.0	0.0	1.0
OTU618776824	Bacteria; Proteobacteria; Alphaproteobacteria; Caulobacterales; Caulobacteraceae; Caulobacter	0.0	8.0	1.0	0.0	0.0	3.0	13.0	49.0	15.0	2.0	2.0	2.0	1.0	1.0	0.0	0.0	0.0	0.0	0.0	0.0	65.0	0.0	0.0	0.0	0.0	1.0	1.0	0.0
OTU645243036	Bacteria; Parcubacteria; Candidatus Falkowbacteria; uncultured Parcubacteria group bacterium; uncultured Parcubacteria group bacterium; uncultured Parcubacteria group bacterium; uncultured Parcubacteria group bacterium	0.0	0.0	0.0	1.0	0.0	1.0	6.0	108.0	102.0	12.0	15.0	0.0	0.0	0.0	0.0	0.0	0.0	0.0	0.0	0.0	0.0	0.0	0.0	0.0	0.0	0.0	0.0	0.0
OTU190259015	Bacteria; Chlorobi; Chlorobia; Chlorobiales; OPB56	0.0	0.0	0.0	0.0	948.0	921.0	101.0	1451.0	1067.0	5.0	19.0	0.0	0.0	0.0	0.0	0.0	0.0	0.0	0.0	0.0	0.0	0.0	0.0	0.0	0.0	0.0	0.0	0.0
OTU131040459	Bacteria; Bacteroidetes; Sphingobacteriia; Sphingobacteriales; Saprospiraceae; uncultured; uncultured bacterium	0.0	0.0	0.0	0.0	3.0	5.0	7.0	9.0	10.0	29.0	105.0	0.0	0.0	0.0	0.0	2.0	0.0	1.0	0.0	0.0	0.0	0.0	0.0	0.0	0.0	0.0	0.0	0.0
OTU783838835	Bacteria; Planctomycetes; Pla3 lineage; uncultured bacterium; uncultured bacterium; uncultured bacterium; uncultured bacterium	0.0	0.0	0.0	0.0	0.0	0.0	0.0	0.0	0.0	0.0	0.0	0.0	0.0	0.0	0.0	0.0	0.0	0.0	0.0	0.0	0.0	0.0	0.0	0.0	99.0	4.0	49.0	24.0
OTU626004553	Bacteria; Proteobacteria; Deltaproteobacteria; Desulfurellales; Desulfurellaceae; H16	0.0	0.0	0.0	0.0	0.0	0.0	0.0	0.0	0.0	0.0	0.0	0.0	0.0	0.0	0.0	3.0	0.0	0.0	0.0	0.0	0.0	0.0	2.0	0.0	103.0	7.0	15.0	16.0
OTU115446586	Bacteria; Planctomycetes; Phycisphaerae; Tepidisphaerales; Tepidisphaeraceae; uncultured bacterium; uncultured bacterium	0.0	1.0	0.0	0.0	0.0	0.0	0.0	0.0	0.0	0.0	0.0	0.0	0.0	0.0	0.0	1.0	0.0	0.0	0.0	0.0	0.0	0.0	0.0	0.0	84.0	54.0	9.0	19.0
OTU118572705	Bacteria; Proteobacteria; Alphaproteobacteria; Alphaproteobacteria Incertae Sedis; Unknown Family; uncultured; uncultured bacterium	0.0	0.0	0.0	0.0	32.0	33.0	17.0	165.0	139.0	3.0	3.0	0.0	0.0	0.0	0.0	0.0	0.0	0.0	0.0	0.0	0.0	0.0	0.0	0.0	0.0	0.0	0.0	0.0
OTU49214719	Bacteria; Planctomycetes; Phycisphaerae; mle1-8; uncultured organism; uncultured organism; uncultured organism	0.0	0.0	0.0	0.0	0.0	0.0	0.0	1.0	0.0	53.0	64.0	0.0	0.0	0.0	0.0	0.0	0.0	0.0	0.0	0.0	0.0	0.0	0.0	0.0	0.0	0.0	0.0	0.0
OTU934242537	Bacteria; Parcubacteria; Candidatus Falkowbacteria; uncultured bacterium; uncultured bacterium; uncultured bacterium; uncultured bacterium	0.0	0.0	0.0	0.0	17.0	32.0	69.0	79.0	154.0	128.0	276.0	0.0	0.0	0.0	0.0	0.0	0.0	0.0	0.0	0.0	0.0	0.0	0.0	0.0	0.0	0.0	0.0	0.0
OTU702978496	Bacteria; Deferribacteres; Deferribacteres Incertae Sedis; Unknown Order; Unknown Family; Caldithrix; uncultured bacterium	0.0	0.0	0.0	0.0	1.0	0.0	0.0	0.0	2.0	194.0	524.0	0.0	0.0	0.0	0.0	0.0	0.0	1.0	0.0	0.0	0.0	0.0	0.0	0.0	0.0	0.0	0.0	0.0
OTU155553430	Bacteria; Planctomycetes; OM190	0.0	0.0	0.0	0.0	0.0	0.0	0.0	0.0	0.0	0.0	0.0	0.0	0.0	0.0	0.0	0.0	0.0	4.0	2.0	16.0	37.0	72.0	23.0	10.0	0.0	0.0	0.0	0.0
OTU355248394	Bacteria; Proteobacteria; Deltaproteobacteria; Myxococcales; Nannocystaceae; uncultured	0.0	0.0	0.0	0.0	0.0	0.0	0.0	0.0	0.0	0.0	0.0	0.0	0.0	0.0	0.0	0.0	0.0	0.0	0.0	0.0	0.0	0.0	0.0	0.0	69.0	26.0	16.0	28.0
OTU914514708	Bacteria; Bacteroidetes; Bacteroidetes BD2-2; Ambiguous_taxa; Ambiguous_taxa; Ambiguous_taxa; Ambiguous_taxa	0.0	0.0	0.0	0.0	1.0	4.0	10.0	16.0	21.0	326.0	326.0	0.0	0.0	0.0	0.0	0.0	0.0	0.0	0.0	0.0	0.0	0.0	0.0	0.0	0.0	0.0	0.0	0.0
OTU378760162	Bacteria; Firmicutes; Clostridia; Clostridiales; Ruminococcaceae; Ruminiclostridium 1; uncultured prokaryote	0.0	0.0	0.0	0.0	17.0	25.0	0.0	3.0	0.0	19.0	74.0	0.0	0.0	0.0	0.0	0.0	0.0	0.0	0.0	0.0	0.0	0.0	0.0	0.0	0.0	0.0	0.0	0.0
OTU557471633	Bacteria; Proteobacteria; Gammaproteobacteria; Chromatiales; Chromatiaceae; Rheinheimera	0.0	425.0	6.0	2.0	0.0	0.0	0.0	0.0	0.0	0.0	0.0	0.0	0.0	2.0	0.0	0.0	0.0	0.0	0.0	0.0	0.0	0.0	0.0	0.0	0.0	0.0	0.0	0.0
OTU125745735	Bacteria; Proteobacteria; Gammaproteobacteria; Xanthomonadales; Xanthomonadales Incertae Sedis; uncultured; uncultured bacterium	0.0	3.0	0.0	2.0	0.0	0.0	0.0	0.0	0.0	0.0	0.0	0.0	0.0	0.0	0.0	3.0	0.0	0.0	0.0	0.0	0.0	0.0	3.0	11.0	264.0	79.0	458.0	666.0
OTU806259418	Bacteria; Firmicutes; Clostridia; Clostridiales; Family XII; Fusibacter; uncultured bacterium	0.0	0.0	0.0	0.0	66.0	82.0	0.0	0.0	3.0	2.0	2.0	2.0	283.0	0.0	0.0	0.0	0.0	0.0	0.0	0.0	0.0	0.0	0.0	0.0	0.0	0.0	0.0	0.0
OTU814299796	Unassigned	0.0	0.0	0.0	0.0	0.0	0.0	0.0	0.0	0.0	80.0	32.0	0.0	0.0	0.0	0.0	0.0	0.0	0.0	0.0	0.0	0.0	0.0	0.0	0.0	0.0	0.0	0.0	0.0
OTU715810448	Bacteria; Bacteroidetes; Flavobacteriia; Flavobacteriales; Flavobacteriaceae; Flavobacterium	1.0	0.0	487.0	1.0	0.0	0.0	0.0	0.0	0.0	0.0	0.0	2.0	2.0	0.0	0.0	0.0	0.0	0.0	0.0	0.0	0.0	0.0	0.0	0.0	0.0	0.0	0.0	0.0
OTU78827762	Bacteria; Bacteroidetes; SB-5; uncultured Bacteroidetes bacterium; uncultured Bacteroidetes bacterium; uncultured Bacteroidetes bacterium; uncultured Bacteroidetes bacterium	0.0	0.0	0.0	0.0	4.0	5.0	1.0	51.0	18.0	29.0	77.0	0.0	0.0	0.0	0.0	0.0	0.0	0.0	0.0	0.0	0.0	0.0	0.0	0.0	0.0	0.0	0.0	0.0
OTU598967175	Bacteria; Spirochaetae; Spirochaetes; Spirochaetales; PL-11B10; uncultured bacterium; uncultured bacterium	0.0	0.0	0.0	0.0	0.0	3.0	14.0	6.0	107.0	2.0	3.0	0.0	0.0	0.0	0.0	0.0	0.0	0.0	0.0	0.0	0.0	0.0	0.0	0.0	0.0	0.0	0.0	0.0
OTU504278425	Bacteria; Proteobacteria; Alphaproteobacteria; Sphingomonadales; Sphingomonadaceae; Sphingopyxis	0.0	21.0	1.0	3.0	0.0	0.0	5.0	1.0	2.0	19.0	70.0	0.0	0.0	0.0	0.0	1.0	0.0	0.0	0.0	0.0	0.0	0.0	0.0	0.0	5.0	2.0	28.0	20.0
OTU991823501	Bacteria; Proteobacteria; Deltaproteobacteria; Desulfobacterales; Desulfobulbaceae; Desulforhopalus; uncultured bacterium	0.0	0.0	0.0	0.0	13.0	22.0	9.0	162.0	117.0	157.0	172.0	0.0	0.0	0.0	0.0	0.0	0.0	0.0	0.0	0.0	0.0	0.0	0.0	0.0	0.0	0.0	0.0	0.0
OTU445778068	Bacteria; Proteobacteria; Deltaproteobacteria; Bdellovibrionales; Bdellovibrionaceae; OM27 clade; uncultured bacterium	0.0	0.0	0.0	0.0	0.0	0.0	0.0	0.0	0.0	0.0	0.0	0.0	0.0	0.0	0.0	0.0	0.0	0.0	0.0	0.0	0.0	0.0	1.0	3.0	212.0	117.0	98.0	126.0
OTU993686186	Unassigned	0.0	0.0	0.0	0.0	0.0	0.0	0.0	0.0	0.0	0.0	0.0	0.0	0.0	0.0	0.0	0.0	0.0	0.0	0.0	0.0	0.0	0.0	0.0	0.0	111.0	50.0	0.0	13.0
OTU922852018	Bacteria; Bacteroidetes; Flavobacteriia; Flavobacteriales; Flavobacteriaceae; Flavobacterium; uncultured bacterium	2.0	3.0	6.0	1.0	3.0	0.0	0.0	0.0	1.0	0.0	4.0	202.0	46.0	32.0	0.0	0.0	1.0	11.0	25.0	66.0	2716.0	53.0	76.0	76.0	0.0	0.0	0.0	0.0
OTU286422046	Bacteria; Chlamydiae; Chlamydiae; Chlamydiales; Simkaniaceae; uncultured	0.0	0.0	0.0	0.0	0.0	0.0	0.0	0.0	0.0	0.0	0.0	0.0	0.0	0.0	0.0	0.0	0.0	0.0	0.0	0.0	0.0	0.0	0.0	1.0	75.0	4.0	6.0	33.0
OTU15119363	Bacteria; Cloacimonetes; PBS-18	0.0	0.0	0.0	0.0	0.0	0.0	20.0	233.0	50.0	5.0	2.0	0.0	0.0	0.0	0.0	0.0	0.0	0.0	0.0	0.0	0.0	0.0	0.0	0.0	0.0	0.0	0.0	0.0
OTU146334094	Bacteria; Chloroflexi; Anaerolineae; Anaerolineales; Anaerolineaceae; uncultured; uncultured bacterium	0.0	0.0	0.0	0.0	0.0	0.0	0.0	0.0	0.0	0.0	0.0	0.0	0.0	0.0	0.0	0.0	0.0	0.0	0.0	0.0	0.0	0.0	1.0	1.0	121.0	21.0	103.0	142.0
OTU217898105	Bacteria; Parcubacteria; Candidatus Falkowbacteria	2.0	2.0	1.0	0.0	1.0	9.0	17.0	38.0	33.0	3.0	4.0	0.0	0.0	0.0	0.0	0.0	0.0	0.0	0.0	0.0	0.0	0.0	0.0	0.0	0.0	0.0	0.0	0.0
OTU388211589	Bacteria; Parcubacteria; uncultured organism; uncultured organism; uncultured organism; uncultured organism; uncultured organism	0.0	0.0	0.0	0.0	0.0	0.0	0.0	0.0	0.0	0.0	0.0	0.0	0.0	0.0	0.0	0.0	0.0	0.0	0.0	0.0	0.0	0.0	0.0	0.0	138.0	1.0	50.0	109.0
OTU853168973	Bacteria; Proteobacteria; Alphaproteobacteria; Rhodospirillales; Rhodospirillaceae; uncultured	0.0	0.0	0.0	0.0	0.0	0.0	0.0	0.0	0.0	0.0	0.0	0.0	0.0	0.0	0.0	0.0	0.0	0.0	0.0	0.0	0.0	0.0	1.0	0.0	349.0	0.0	0.0	1.0
OTU203097841	Bacteria; Chloroflexi; Thermoflexia; Thermoflexales; Thermoflexaceae; Thermoflexus; uncultured bacterium	1.0	1.0	1.0	1.0	1.0	0.0	0.0	0.0	0.0	0.0	0.0	0.0	0.0	0.0	0.0	0.0	0.0	89.0	86.0	19.0	29.0	24.0	38.0	26.0	0.0	0.0	0.0	0.0
OTU551236410	Bacteria; SR1 (Absconditabacteria); uncultured bacterium; uncultured bacterium; uncultured bacterium; uncultured bacterium; uncultured bacterium	0.0	0.0	0.0	0.0	0.0	2.0	42.0	79.0	84.0	1.0	4.0	0.0	0.0	0.0	0.0	0.0	0.0	0.0	0.0	0.0	0.0	0.0	0.0	0.0	0.0	0.0	0.0	0.0
OTU299007655	Bacteria; Ignavibacteriae; Ignavibacteria; Ignavibacteriales; PHOS-HE36	4.0	0.0	0.0	1.0	1.0	1.0	5.0	71.0	55.0	65.0	65.0	0.0	0.0	1.0	0.0	0.0	0.0	0.0	0.0	0.0	0.0	0.0	0.0	0.0	0.0	0.0	0.0	0.0
OTU139760036	Bacteria; Bacteroidetes; Bacteroidetes vadinHA17	0.0	0.0	0.0	0.0	0.0	0.0	0.0	2.0	0.0	49.0	90.0	0.0	0.0	0.0	0.0	0.0	0.0	0.0	0.0	0.0	0.0	0.0	0.0	0.0	0.0	0.0	0.0	0.0
OTU878629120	Bacteria; Chloroflexi; Anaerolineae; Anaerolineales; Anaerolineaceae; uncultured	0.0	1.0	0.0	0.0	0.0	0.0	0.0	0.0	0.0	0.0	0.0	0.0	0.0	0.0	0.0	0.0	0.0	42.0	48.0	108.0	202.0	465.0	33.0	14.0	0.0	0.0	0.0	0.0
OTU443404026	Bacteria; Planctomycetes; Phycisphaerae; CCM11a; uncultured bacterium; uncultured bacterium; uncultured bacterium	0.0	0.0	0.0	0.0	0.0	0.0	0.0	0.0	0.0	0.0	0.0	0.0	0.0	0.0	0.0	0.0	0.0	0.0	0.0	0.0	0.0	0.0	0.0	2.0	70.0	7.0	21.0	50.0
OTU171697078	Bacteria; Proteobacteria; Alphaproteobacteria; Rhodospirillales; Rhodospirillaceae; uncultured	0.0	0.0	0.0	1.0	0.0	0.0	0.0	0.0	0.0	0.0	0.0	0.0	0.0	0.0	0.0	0.0	0.0	0.0	0.0	0.0	0.0	0.0	0.0	0.0	12.0	4.0	44.0	55.0
OTU546297046	Bacteria; Proteobacteria; Gammaproteobacteria; Methylococcales; Methylococcaceae; Methylomonas; Ambiguous_taxa	0.0	0.0	0.0	0.0	8.0	9.0	193.0	271.0	23.0	26.0	58.0	0.0	0.0	1.0	0.0	0.0	0.0	0.0	0.0	0.0	0.0	0.0	0.0	0.0	0.0	0.0	0.0	0.0
OTU396834968	Bacteria; Proteobacteria; Epsilonproteobacteria; Campylobacterales; Helicobacteraceae; uncultured; Ambiguous_taxa	1.0	31.0	29.0	14.0	206.0	145.0	71.0	446.0	243.0	199.0	240.0	1.0	6.0	7.0	2.0	2.0	2.0	0.0	2.0	0.0	0.0	0.0	0.0	0.0	0.0	0.0	0.0	0.0
OTU218325208	Bacteria; Acidobacteria; Blastocatellia; Blastocatellales; Blastocatellaceae (Subgroup 4); 11-24; uncultured bacterium	0.0	0.0	0.0	0.0	0.0	0.0	0.0	0.0	0.0	0.0	0.0	0.0	0.0	0.0	0.0	0.0	0.0	0.0	0.0	0.0	0.0	0.0	4.0	11.0	0.0	15.0	168.0	72.0
OTU782828007	Unassigned	0.0	0.0	0.0	0.0	0.0	0.0	0.0	0.0	0.0	61.0	74.0	0.0	0.0	0.0	0.0	0.0	0.0	0.0	0.0	0.0	0.0	0.0	3.0	0.0	6.0	11.0	44.0	33.0
OTU683360834	Bacteria; Verrucomicrobia; Verrucomicrobia Incertae Sedis; Unknown Order; Unknown Family; Candidatus Methylacidiphilum; uncultured bacterium	0.0	0.0	0.0	0.0	0.0	0.0	34.0	7.0	80.0	1.0	5.0	0.0	0.0	0.0	0.0	0.0	0.0	0.0	0.0	0.0	0.0	0.0	0.0	0.0	0.0	0.0	0.0	0.0
OTU916376308	Bacteria; Proteobacteria; Gammaproteobacteria; Thiotrichales; Thiotrichaceae; Beggiatoa; uncultured bacterium	0.0	1.0	0.0	0.0	66.0	47.0	591.0	1.0	1337.0	2.0	5.0	0.0	0.0	0.0	0.0	0.0	0.0	0.0	0.0	0.0	0.0	0.0	0.0	0.0	0.0	0.0	0.0	0.0
OTU618003010	Bacteria; Proteobacteria; Betaproteobacteria; Nitrosomonadales; Nitrosomonadaceae; uncultured; uncultured bacterium	0.0	0.0	0.0	0.0	0.0	0.0	0.0	0.0	0.0	0.0	0.0	0.0	0.0	0.0	0.0	0.0	0.0	0.0	0.0	0.0	0.0	0.0	1.0	0.0	19.0	4.0	43.0	81.0
OTU492523451	Bacteria; Proteobacteria; Gammaproteobacteria; Chromatiales; Chromatiaceae; Rheinheimera; Ambiguous_taxa	0.0	144.0	79.0	1.0	1.0	0.0	1.0	0.0	0.0	0.0	0.0	0.0	0.0	507.0	1.0	1.0	1.0	24.0	23.0	56.0	987.0	9.0	329.0	243.0	0.0	0.0	0.0	0.0
OTU46625146	Bacteria; Omnitrophica	0.0	0.0	0.0	0.0	1.0	0.0	26.0	134.0	19.0	24.0	36.0	0.0	0.0	0.0	0.0	0.0	0.0	0.0	0.0	0.0	0.0	0.0	0.0	0.0	0.0	0.0	0.0	0.0
OTU67930789	Bacteria; Acidobacteria; Subgroup 6; uncultured bacterium; uncultured bacterium; uncultured bacterium; uncultured bacterium	0.0	0.0	0.0	1.0	0.0	0.0	0.0	0.0	0.0	0.0	0.0	0.0	0.0	0.0	0.0	0.0	0.0	0.0	0.0	0.0	0.0	0.0	4.0	1.0	14.0	5.0	60.0	75.0
OTU780480586	Bacteria; Verrucomicrobia; Opitutae; Opitutales; Opitutaceae; Opitutus	1.0	0.0	0.0	0.0	41.0	43.0	1.0	6.0	7.0	11.0	14.0	0.0	0.0	0.0	0.0	0.0	0.0	0.0	0.0	0.0	0.0	0.0	0.0	0.0	0.0	0.0	0.0	0.0
OTU303065817	Bacteria; Parcubacteria; Candidatus Uhrbacteria	0.0	0.0	0.0	0.0	0.0	0.0	0.0	0.0	0.0	0.0	0.0	0.0	0.0	0.0	0.0	0.0	0.0	0.0	0.0	0.0	0.0	0.0	0.0	0.0	95.0	28.0	0.0	0.0
OTU265614624	Unassigned	0.0	3.0	0.0	0.0	2.0	11.0	6.0	104.0	38.0	9.0	7.0	0.0	0.0	0.0	0.0	0.0	0.0	0.0	0.0	0.0	0.0	0.0	0.0	0.0	0.0	0.0	0.0	0.0
OTU857895977	Bacteria; Planctomycetes; Planctomycetacia; Planctomycetales; Planctomycetaceae; uncultured; uncultured bacterium	0.0	0.0	0.0	1.0	0.0	0.0	0.0	0.0	0.0	0.0	0.0	0.0	0.0	0.0	0.0	2.0	0.0	0.0	0.0	0.0	0.0	0.0	0.0	0.0	30.0	34.0	18.0	34.0
OTU756143794	Bacteria; Planctomycetes; vadinHA49; uncultured bacterium; uncultured bacterium; uncultured bacterium; uncultured bacterium	0.0	0.0	0.0	0.0	0.0	0.0	0.0	0.0	0.0	0.0	0.0	0.0	0.0	0.0	0.0	0.0	0.0	0.0	0.0	0.0	0.0	0.0	3.0	2.0	399.0	388.0	209.0	633.0
OTU891381230	Bacteria; Acidobacteria; Subgroup 11; uncultured Acidobacteria bacterium; uncultured Acidobacteria bacterium; uncultured Acidobacteria bacterium; uncultured Acidobacteria bacterium	0.0	1.0	0.0	0.0	0.0	0.0	0.0	0.0	0.0	0.0	0.0	0.0	0.0	0.0	0.0	2.0	0.0	0.0	0.0	0.0	0.0	0.0	2.0	1.0	179.0	4.0	44.0	189.0
OTU566640945	Bacteria; Cyanobacteria; ML635J-21	0.0	0.0	0.0	0.0	8.0	4.0	33.0	149.0	83.0	10.0	9.0	0.0	0.0	0.0	0.0	0.0	0.0	0.0	0.0	0.0	0.0	0.0	0.0	0.0	0.0	0.0	0.0	0.0
OTU138420506	Bacteria; Verrucomicrobia; OPB35 soil group; uncultured bacterium; uncultured bacterium; uncultured bacterium; uncultured bacterium	0.0	0.0	0.0	0.0	0.0	0.0	0.0	0.0	0.0	0.0	0.0	0.0	0.0	0.0	0.0	0.0	0.0	0.0	0.0	0.0	0.0	0.0	0.0	0.0	489.0	16.0	5.0	42.0
OTU874664762	Bacteria; Proteobacteria; Alphaproteobacteria; Rickettsiales; Rickettsiales Incertae Sedis; Candidatus Odyssella; uncultured bacterium	0.0	1.0	0.0	0.0	0.0	0.0	0.0	0.0	0.0	0.0	0.0	0.0	0.0	0.0	0.0	0.0	0.0	0.0	0.0	0.0	0.0	0.0	0.0	0.0	24.0	14.0	35.0	108.0
OTU671834667	Unassigned	0.0	0.0	0.0	0.0	1.0	1.0	24.0	193.0	180.0	1.0	6.0	0.0	0.0	0.0	0.0	0.0	0.0	0.0	0.0	0.0	0.0	1.0	0.0	0.0	0.0	0.0	0.0	0.0
OTU36692893	Bacteria; Firmicutes; Clostridia; Halanaerobiales; ODP1230B8.23; uncultured bacterium; uncultured bacterium	1.0	1.0	1.0	0.0	0.0	0.0	0.0	0.0	0.0	0.0	0.0	0.0	0.0	1.0	0.0	0.0	0.0	22.0	26.0	13.0	57.0	82.0	6.0	6.0	0.0	0.0	0.0	0.0
OTU639456860	Bacteria; Proteobacteria; Deltaproteobacteria; Oligoflexales; Oligoflexaceae; uncultured bacterium; uncultured bacterium	0.0	0.0	0.0	0.0	3.0	1.0	6.0	58.0	51.0	0.0	0.0	0.0	0.0	0.0	0.0	0.0	0.0	0.0	0.0	0.0	0.0	0.0	0.0	0.0	0.0	0.0	0.0	0.0
OTU484955718	Bacteria; Bacteroidetes; WCHB1-32; uncultured bacterium; uncultured bacterium; uncultured bacterium; uncultured bacterium	0.0	0.0	0.0	0.0	5.0	7.0	167.0	1881.0	1228.0	16.0	28.0	0.0	0.0	0.0	0.0	0.0	0.0	0.0	0.0	0.0	0.0	0.0	0.0	0.0	0.0	0.0	0.0	0.0
OTU35862752	Bacteria; Proteobacteria; Gammaproteobacteria; Aeromonadales; Aeromonadaceae; Aeromonas; uncultured bacterium	0.0	0.0	0.0	0.0	0.0	0.0	7.0	135.0	2.0	0.0	0.0	0.0	2.0	23.0	0.0	0.0	0.0	0.0	0.0	0.0	0.0	1.0	0.0	0.0	0.0	0.0	0.0	0.0
OTU521651715	Bacteria; Nitrospirae; Nitrospira; Nitrospirales; Nitrospiraceae; Nitrospira; uncultured bacterium	0.0	0.0	0.0	0.0	1.0	0.0	0.0	0.0	0.0	0.0	0.0	0.0	0.0	0.0	0.0	2.0	1.0	0.0	0.0	0.0	0.0	0.0	23.0	22.0	781.0	54.0	1389.0	2349.0
OTU79453575	Bacteria; Peregrinibacteria; uncultured bacterium; uncultured bacterium; uncultured bacterium; uncultured bacterium; uncultured bacterium	0.0	0.0	0.0	0.0	4.0	6.0	67.0	1059.0	1006.0	16.0	12.0	0.0	0.0	0.0	0.0	0.0	0.0	0.0	0.0	0.0	0.0	0.0	0.0	0.0	0.0	0.0	0.0	0.0
OTU925255381	Bacteria; Verrucomicrobia; WCHB1-41	0.0	0.0	0.0	0.0	5.0	7.0	0.0	245.0	3.0	0.0	0.0	0.0	0.0	0.0	0.0	0.0	0.0	0.0	0.0	0.0	0.0	0.0	0.0	0.0	0.0	0.0	0.0	0.0
OTU518963664	Bacteria; Proteobacteria; Deltaproteobacteria; NB1-j; uncultured bacterium; uncultured bacterium; uncultured bacterium	0.0	1.0	0.0	0.0	0.0	0.0	0.0	0.0	0.0	0.0	0.0	0.0	0.0	0.0	0.0	1.0	0.0	0.0	0.0	0.0	0.0	0.0	1.0	6.0	176.0	351.0	213.0	276.0
