# Supplementary material for: Microbial Ecosystems in Movile Cave: An Environment of Extreme Life
Source: Life (Basel). 2023 Oct 26;13(11):2120. doi: 10.3390/life13112120 (PMC10672346; doi:10.3390/life13112120)
Supplement: Supplementary file 1 [file life-13-02120-s001.zip › Table S2.xlsx]

## Sheet: Blad1
#OTU ID	taxonomy	AP1	AP2	AP3	DI1	DI2	DI3	GO1	GO2	GO3	HE1	HE2	HE3	JA1	JA2	JA3	MA1	MA2	MA3	MG1	MG2	MG3	MS1	MS2	MS3	MT1	MT2	MT3	OB1	OB2	OB3	OL1	OL2	OL3	PY1	PY2	PY3	QZ1	QZ2	QZ3	SI1	SI2	SI3
OTU468355918	Bacteria; Proteobacteria; Gammaproteobacteria; Chromatiales; Halothiobacillaceae; Thiovirga; uncultured bacterium	6053.0	40730.0	39193.0	27904.0	17096.0	18291.0	2606.0	242.0	2191.0	22009.0	14218.0	16340.0	5135.0	678.0	489.0	16.0	49.0	85.0	44.0	272.0	366.0	10782.0	5270.0	3001.0	47.0	258.0	426.0	11589.0	16145.0	13489.0	646.0	113.0	22.0	0.0	928.0	510.0	18.0	17.0	9.0	125.0	44.0	965.0
OTU996756366	Bacteria; Proteobacteria; Betaproteobacteria; Burkholderiales; Comamonadaceae	543.0	4946.0	1409.0	1544.0	871.0	1352.0	1.0	3.0	10.0	307.0	1337.0	1953.0	43.0	24.0	3.0	0.0	0.0	0.0	1.0	2.0	8.0	1118.0	3468.0	4666.0	8.0	71.0	60.0	1371.0	1942.0	2758.0	0.0	0.0	3.0	0.0	0.0	0.0	2.0	0.0	2.0	1.0	3.0	11.0
OTU218322422	Bacteria; Proteobacteria; Epsilonproteobacteria; Campylobacterales; Helicobacteraceae; Sulfurovum; Ambiguous_taxa	21390.0	2621.0	5500.0	2940.0	1438.0	593.0	4.0	115.0	31.0	653.0	1027.0	298.0	4.0	0.0	222.0	1.0	10.0	142.0	7.0	47.0	31.0	1074.0	26052.0	14799.0	68.0	445.0	86.0	311.0	384.0	397.0	916.0	21.0	5.0	1.0	373.0	23.0	40.0	1.0	71.0	6.0	5.0	147.0
OTU96110464	Bacteria; Proteobacteria; Gammaproteobacteria; Pseudomonadales; Pseudomonadaceae; Pseudomonas; uncultured bacterium	8456.0	12693.0	649.0	426.0	1394.0	219.0	1.0	6.0	2.0	2140.0	25.0	17924.0	353.0	1.0	1.0	0.0	0.0	0.0	4.0	0.0	0.0	144.0	82.0	721.0	1.0	0.0	0.0	116.0	119.0	0.0	8.0	17.0	0.0	0.0	0.0	0.0	1.0	0.0	0.0	3.0	4.0	37.0
OTU394273518	Bacteria; Proteobacteria; Deltaproteobacteria; Desulfobacterales; Desulfobulbaceae; Desulfocapsa; Ambiguous_taxa	2494.0	311.0	66.0	5201.0	4404.0	4970.0	2533.0	3674.0	3110.0	761.0	828.0	884.0	212.0	1308.0	29.0	188.0	1047.0	36.0	6038.0	620.0	1187.0	102.0	454.0	680.0	21.0	280.0	115.0	700.0	362.0	777.0	484.0	777.0	736.0	137.0	159.0	287.0	1543.0	195.0	936.0	4669.0	1810.0	3670.0
OTU389324329	Bacteria; Proteobacteria; Deltaproteobacteria; Desulfobacterales; Desulfobulbaceae; Desulfurivibrio; uncultured bacterium	10.0	322.0	422.0	730.0	1051.0	919.0	7057.0	13893.0	10367.0	46.0	107.0	240.0	6946.0	8547.0	5935.0	4803.0	6381.0	4517.0	11838.0	16464.0	12714.0	113.0	68.0	108.0	37953.0	2824.0	39867.0	20.0	375.0	198.0	21544.0	11538.0	7047.0	607.0	4614.0	7974.0	161.0	167.0	167.0	1950.0	4959.0	5488.0
OTU54257532	Bacteria; Proteobacteria; Deltaproteobacteria; Desulfobacterales; Desulfobulbaceae	2087.0	146.0	427.0	172.0	430.0	73.0	559.0	781.0	5915.0	5214.0	5530.0	1624.0	4719.0	85.0	1902.0	10.0	10.0	12.0	5169.0	231.0	206.0	23.0	1421.0	60.0	0.0	32.0	70.0	102.0	435.0	243.0	3997.0	31607.0	36618.0	1520.0	1505.0	2815.0	163.0	61.0	2.0	14711.0	22500.0	3.0
OTU531253006	Bacteria; Proteobacteria; Gammaproteobacteria; Pseudomonadales; Pseudomonadaceae; Pseudomonas	1215.0	2000.0	1557.0	2621.0	836.0	2702.0	6.0	12.0	15.0	210.0	611.0	39.0	40.0	11.0	0.0	1.0	0.0	5.0	3.0	28.0	0.0	460.0	3279.0	1189.0	0.0	7.0	10.0	53.0	94.0	47.0	1.0	3.0	1.0	0.0	46.0	0.0	40.0	1.0	0.0	0.0	1.0	1.0
OTU50607773	Bacteria; Proteobacteria; Epsilonproteobacteria; Campylobacterales; Campylobacteraceae; Arcobacter; Ambiguous_taxa	154.0	54.0	273.0	189.0	182.0	184.0	658.0	1154.0	68.0	460.0	446.0	320.0	448.0	5467.0	1963.0	28.0	113.0	105.0	190.0	151.0	728.0	183.0	677.0	315.0	16.0	16.0	7.0	1219.0	1454.0	2219.0	590.0	411.0	348.0	49.0	59.0	571.0	1859.0	2273.0	865.0	205.0	314.0	22584.0
OTU720855782	Bacteria; Proteobacteria; Epsilonproteobacteria; Campylobacterales; Helicobacteraceae; Sulfuricurvum	1157.0	5.0	7025.0	574.0	1266.0	5556.0	27721.0	10252.0	225.0	31.0	19.0	43.0	1088.0	359.0	19080.0	5.0	44.0	6178.0	30.0	200.0	7621.0	206.0	81.0	100.0	1.0	16.0	9.0	200.0	68.0	15.0	220.0	69.0	10.0	0.0	37.0	12.0	0.0	5.0	33.0	21.0	69.0	3875.0
OTU706745593	Bacteria; Proteobacteria; Deltaproteobacteria; Desulfuromonadales	0.0	6.0	36.0	2.0	9.0	6.0	1124.0	1899.0	211.0	0.0	0.0	1.0	1274.0	222.0	767.0	3.0	2.0	59.0	8573.0	6389.0	4610.0	0.0	2.0	5.0	0.0	4.0	28.0	0.0	0.0	0.0	822.0	1.0	12.0	32.0	904.0	89.0	0.0	0.0	2.0	56.0	112.0	254.0
OTU348765808	Bacteria; Chloroflexi; Anaerolineae; Anaerolineales; Anaerolineaceae; uncultured; uncultured bacterium	659.0	250.0	558.0	45.0	26.0	26.0	435.0	304.0	449.0	91.0	130.0	68.0	201.0	175.0	20.0	435.0	474.0	487.0	274.0	513.0	337.0	95.0	216.0	346.0	44.0	64.0	38.0	1628.0	728.0	1086.0	71.0	26.0	5.0	0.0	243.0	30.0	35.0	0.0	158.0	460.0	535.0	718.0
OTU785938400	Bacteria; Ignavibacteriae; Ignavibacteria; Ignavibacteriales; IheB3-7; uncultured bacterium; uncultured bacterium	528.0	138.0	118.0	74.0	45.0	42.0	77.0	132.0	144.0	98.0	76.0	44.0	165.0	149.0	41.0	109.0	79.0	111.0	227.0	149.0	184.0	191.0	256.0	510.0	48.0	10.0	49.0	902.0	214.0	756.0	268.0	89.0	195.0	1.0	87.0	133.0	273.0	180.0	1042.0	354.0	133.0	291.0
OTU136893131	Bacteria; RBG-1 (Zixibacteria); uncultured bacterium; uncultured bacterium; uncultured bacterium; uncultured bacterium; uncultured bacterium	11.0	1.0	3.0	0.0	5.0	1.0	319.0	311.0	326.0	56.0	56.0	50.0	290.0	79.0	113.0	139.0	63.0	95.0	327.0	237.0	381.0	1.0	3.0	24.0	2.0	1.0	3.0	8.0	0.0	68.0	7.0	35.0	0.0	0.0	0.0	30.0	0.0	0.0	0.0	356.0	458.0	91.0
OTU863085454	Bacteria; Proteobacteria; Betaproteobacteria; Burkholderiales; Comamonadaceae; Limnohabitans	159.0	1784.0	85.0	4896.0	7655.0	6516.0	2.0	0.0	15.0	3.0	109.0	44.0	22.0	0.0	0.0	0.0	3.0	2.0	2.0	7.0	0.0	4495.0	1862.0	3523.0	14.0	87.0	27.0	2643.0	3820.0	2335.0	0.0	0.0	2.0	0.0	0.0	0.0	0.0	1.0	0.0	9.0	1.0	108.0
OTU861763053	Bacteria; Proteobacteria; Deltaproteobacteria; Desulfuromonadales; Geobacteraceae; Geobacter; Ambiguous_taxa	959.0	197.0	269.0	952.0	320.0	272.0	631.0	1141.0	1809.0	687.0	1372.0	748.0	467.0	159.0	127.0	27.0	28.0	28.0	540.0	350.0	297.0	38.0	846.0	288.0	2.0	91.0	65.0	168.0	58.0	306.0	333.0	794.0	972.0	1749.0	1430.0	4635.0	970.0	275.0	107.0	1295.0	1210.0	970.0
OTU657485594	Bacteria; Bacteroidetes; Sphingobacteriia; Sphingobacteriales; Lentimicrobiaceae; uncultured Bacteroidetes bacterium; uncultured Bacteroidetes bacterium	0.0	13.0	7.0	8.0	2.0	0.0	27.0	1.0	14.0	7.0	10.0	16.0	13.0	19.0	15.0	36.0	21.0	42.0	6.0	32.0	19.0	57.0	14.0	10.0	29.0	100.0	32.0	40.0	117.0	100.0	23.0	8.0	17.0	0.0	16.0	1.0	0.0	68.0	0.0	26.0	19.0	16.0
OTU891338948	Bacteria; Proteobacteria; Deltaproteobacteria; Desulfobacterales; Desulfobulbaceae; Desulfurivibrio; uncultured bacterium	57.0	49.0	35.0	842.0	796.0	747.0	1048.0	3903.0	6303.0	274.0	366.0	1190.0	105.0	208.0	62.0	21.0	30.0	16.0	410.0	376.0	148.0	48.0	122.0	127.0	7.0	58.0	104.0	43.0	37.0	215.0	1886.0	505.0	545.0	3.0	453.0	1203.0	1327.0	706.0	195.0	1410.0	2616.0	1645.0
OTU114255145	Bacteria; Proteobacteria; Deltaproteobacteria; Desulfarculales; Desulfarculaceae; uncultured; uncultured bacterium	0.0	3.0	0.0	0.0	0.0	1.0	3.0	0.0	0.0	0.0	0.0	0.0	0.0	4.0	4.0	33.0	27.0	83.0	16.0	14.0	1.0	0.0	0.0	0.0	3.0	9.0	3.0	0.0	0.0	0.0	46.0	0.0	0.0	0.0	0.0	0.0	0.0	0.0	0.0	0.0	0.0	4.0
OTU243700681	Bacteria; Nitrospirae; Nitrospira; Nitrospirales; Nitrospiraceae; uncultured; uncultured bacterium	0.0	2.0	16.0	3.0	0.0	2.0	0.0	2.0	0.0	1.0	4.0	0.0	0.0	2.0	2.0	11168.0	5556.0	23680.0	0.0	2.0	0.0	8.0	0.0	0.0	10348.0	2477.0	0.0	0.0	0.0	2.0	10.0	0.0	1.0	6.0	0.0	3.0	0.0	0.0	0.0	0.0	0.0	0.0
OTU974145137	Bacteria; Proteobacteria; Deltaproteobacteria; Desulfobacterales; Desulfobulbaceae; MSBL7; uncultured bacterium	365.0	385.0	235.0	410.0	275.0	425.0	4830.0	6019.0	6189.0	368.0	544.0	459.0	3893.0	4695.0	4449.0	4097.0	11565.0	3181.0	6172.0	8081.0	10305.0	12.0	20.0	205.0	36.0	103.0	105.0	18.0	12.0	24.0	6581.0	732.0	504.0	108.0	426.0	667.0	84.0	38.0	62.0	4779.0	8147.0	5446.0
OTU8782774	Bacteria; Proteobacteria; Deltaproteobacteria; Desulfobacterales; Desulfobulbaceae; MSBL7	0.0	12.0	19.0	0.0	0.0	0.0	76.0	1.0	18.0	0.0	0.0	0.0	134.0	530.0	90.0	1697.0	1279.0	917.0	764.0	675.0	422.0	2.0	0.0	31.0	0.0	197.0	2.0	0.0	0.0	0.0	57.0	14.0	0.0	0.0	0.0	1.0	0.0	0.0	0.0	37.0	67.0	284.0
OTU854407162	Bacteria; Proteobacteria; Deltaproteobacteria; Desulfobacterales; Desulfobulbaceae; MSBL7	1.0	11.0	86.0	3.0	0.0	33.0	36.0	0.0	8.0	0.0	1.0	0.0	690.0	202.0	177.0	3513.0	2910.0	3007.0	238.0	154.0	202.0	0.0	0.0	8.0	212.0	1224.0	34.0	0.0	0.0	28.0	10.0	0.0	1.0	1.0	33.0	13.0	0.0	0.0	121.0	7.0	47.0	93.0
OTU526076122	Unassigned	0.0	3.0	0.0	1.0	0.0	1.0	90.0	66.0	33.0	10.0	7.0	0.0	381.0	284.0	569.0	1909.0	590.0	911.0	443.0	609.0	16.0	0.0	0.0	9.0	2.0	16.0	28.0	0.0	63.0	1.0	178.0	16.0	0.0	0.0	24.0	2.0	0.0	0.0	0.0	21.0	16.0	57.0
OTU489638397	Bacteria; Proteobacteria; Betaproteobacteria; Rhodocyclales; Rhodocyclaceae; Sulfuritalea; uncultured bacterium	0.0	2.0	8.0	0.0	0.0	0.0	1.0	0.0	0.0	0.0	0.0	0.0	1.0	0.0	2.0	548.0	874.0	1221.0	0.0	3.0	1.0	4.0	0.0	4.0	6803.0	4198.0	5092.0	0.0	0.0	0.0	54.0	1.0	0.0	1.0	3.0	0.0	0.0	0.0	0.0	0.0	0.0	0.0
OTU879266635	Bacteria; Proteobacteria; Betaproteobacteria; Rhodocyclales; Rhodocyclaceae; uncultured	0.0	1.0	0.0	0.0	0.0	0.0	1.0	0.0	0.0	0.0	0.0	0.0	0.0	0.0	1.0	865.0	2146.0	260.0	0.0	0.0	0.0	52.0	0.0	3.0	5083.0	7338.0	4800.0	0.0	0.0	2.0	503.0	0.0	16.0	1.0	0.0	29.0	0.0	0.0	0.0	0.0	0.0	0.0
OTU825446644	Bacteria; Acidobacteria; Holophagae; Holophagales; Holophagaceae; Geothrix; uncultured bacterium	0.0	0.0	0.0	0.0	0.0	0.0	0.0	0.0	0.0	0.0	1.0	0.0	0.0	0.0	1.0	456.0	1060.0	730.0	0.0	0.0	0.0	0.0	0.0	12.0	275.0	5189.0	390.0	0.0	0.0	0.0	4.0	0.0	0.0	0.0	0.0	0.0	0.0	0.0	0.0	0.0	0.0	0.0
OTU142756260	Bacteria; Proteobacteria; Betaproteobacteria; Burkholderiales; Comamonadaceae; uncultured; uncultured bacterium	5.0	0.0	0.0	6.0	2.0	11.0	1.0	0.0	0.0	4.0	0.0	0.0	6.0	0.0	0.0	108.0	206.0	31.0	2.0	0.0	0.0	2.0	9.0	0.0	3.0	19.0	0.0	0.0	0.0	0.0	0.0	1.0	0.0	0.0	0.0	0.0	0.0	0.0	0.0	1.0	12.0	8.0
OTU4491747	Bacteria; Spirochaetae; Spirochaetes; Spirochaetales; Leptospiraceae; uncultured; uncultured bacterium	0.0	1.0	0.0	0.0	0.0	0.0	2.0	0.0	0.0	0.0	0.0	0.0	4.0	14.0	0.0	123.0	57.0	170.0	5.0	4.0	3.0	0.0	0.0	3.0	18.0	92.0	0.0	0.0	0.0	0.0	3.0	0.0	0.0	0.0	0.0	0.0	0.0	0.0	0.0	4.0	6.0	7.0
OTU773667810	Bacteria; Proteobacteria; Gammaproteobacteria; Aeromonadales; Aeromonadaceae; Aeromonas	75.0	23.0	2.0	4.0	19.0	2.0	1.0	2.0	1.0	98.0	14.0	0.0	2.0	0.0	0.0	0.0	1.0	0.0	15.0	8.0	1.0	134.0	405.0	129.0	0.0	0.0	0.0	23.0	3.0	23.0	0.0	0.0	1.0	0.0	1.0	1.0	0.0	0.0	1.0	0.0	0.0	0.0
OTU903509826	Bacteria; Chloroflexi; Anaerolineae; Anaerolineales; Anaerolineaceae	2.0	0.0	0.0	0.0	0.0	0.0	0.0	0.0	0.0	0.0	0.0	0.0	0.0	0.0	0.0	43.0	33.0	33.0	0.0	0.0	0.0	0.0	0.0	13.0	6.0	12.0	0.0	40.0	10.0	0.0	0.0	0.0	0.0	0.0	0.0	0.0	0.0	0.0	0.0	0.0	4.0	3.0
OTU188444147	Bacteria; Proteobacteria; Deltaproteobacteria; Desulfobacterales; Desulfobulbaceae; Desulforhopalus; uncultured bacterium	2.0	4.0	3.0	5.0	6.0	3.0	10.0	7.0	12.0	13.0	12.0	14.0	18.0	14.0	4.0	26.0	64.0	4.0	19.0	0.0	12.0	7.0	21.0	13.0	16.0	88.0	103.0	10.0	4.0	0.0	24.0	14.0	23.0	0.0	0.0	16.0	95.0	22.0	58.0	9.0	12.0	14.0
OTU987287789	Bacteria; Proteobacteria; Deltaproteobacteria; Desulfobacterales; Desulfobulbaceae	0.0	23.0	19.0	31.0	8.0	8.0	209.0	66.0	109.0	5.0	118.0	39.0	23.0	41.0	18.0	4.0	3.0	1.0	19.0	26.0	5.0	702.0	796.0	383.0	13.0	37.0	8.0	377.0	358.0	209.0	610.0	14.0	0.0	0.0	152.0	0.0	48.0	80.0	0.0	17.0	31.0	34.0
OTU284784016	Bacteria; Parcubacteria; uncultured bacterium; uncultured bacterium; uncultured bacterium; uncultured bacterium; uncultured bacterium	0.0	0.0	2.0	0.0	0.0	0.0	0.0	0.0	0.0	0.0	0.0	0.0	0.0	0.0	0.0	5092.0	1.0	2649.0	0.0	4.0	0.0	6.0	0.0	0.0	104.0	3747.0	1.0	0.0	0.0	0.0	9.0	0.0	0.0	1.0	0.0	0.0	0.0	0.0	0.0	0.0	0.0	1.0
OTU620310336	Bacteria; Nitrospirae; Nitrospira; Nitrospirales; FW13	0.0	4.0	1.0	1.0	2.0	1.0	1.0	1.0	1.0	0.0	2.0	0.0	7.0	6.0	0.0	1678.0	2922.0	4302.0	0.0	0.0	3.0	0.0	0.0	0.0	276.0	4339.0	1.0	0.0	0.0	0.0	1.0	0.0	1.0	0.0	0.0	0.0	0.0	0.0	0.0	0.0	0.0	1.0
OTU514970448	Bacteria; Proteobacteria; Deltaproteobacteria; Desulfobacterales; Desulfobulbaceae; Desulfobulbus	0.0	0.0	1.0	0.0	1.0	0.0	0.0	0.0	0.0	1.0	0.0	1.0	4.0	5.0	0.0	1501.0	20.0	771.0	0.0	0.0	0.0	0.0	1.0	4.0	214.0	18.0	0.0	0.0	0.0	29.0	9.0	0.0	0.0	0.0	0.0	0.0	0.0	0.0	0.0	0.0	0.0	0.0
OTU705257634	Bacteria; Proteobacteria; Deltaproteobacteria; Desulfobacterales; Desulfobulbaceae; MSBL7; uncultured bacterium	488.0	272.0	123.0	13.0	65.0	55.0	1441.0	1363.0	3006.0	1050.0	1308.0	1306.0	1449.0	852.0	1417.0	939.0	1923.0	659.0	2382.0	895.0	385.0	40.0	120.0	137.0	120.0	186.0	621.0	0.0	9.0	12.0	4488.0	3826.0	2360.0	352.0	3053.0	1983.0	0.0	88.0	143.0	903.0	1436.0	968.0
OTU967555337	Bacteria; Proteobacteria; Deltaproteobacteria; Desulfobacterales; Desulfobulbaceae; Desulfocapsa; uncultured bacterium	256.0	226.0	240.0	2164.0	3445.0	1443.0	1449.0	4593.0	4158.0	30.0	130.0	520.0	1750.0	3594.0	1904.0	875.0	2669.0	444.0	1660.0	4480.0	3257.0	63.0	48.0	74.0	80.0	139.0	482.0	45.0	29.0	103.0	517.0	388.0	800.0	4.0	577.0	199.0	94.0	138.0	548.0	1484.0	3228.0	4896.0
OTU242393823	Bacteria; Proteobacteria; Deltaproteobacteria; Desulfobacterales; Desulfobulbaceae; Desulfobulbus; uncultured bacterium	0.0	42.0	29.0	0.0	1.0	133.0	25.0	0.0	5.0	1.0	1.0	0.0	68.0	50.0	18.0	901.0	987.0	1054.0	489.0	1145.0	892.0	15.0	2.0	70.0	263.0	125.0	68.0	0.0	0.0	0.0	105.0	0.0	0.0	0.0	98.0	17.0	1.0	0.0	58.0	0.0	1.0	39.0
OTU120571865	Bacteria; Nitrospirae; Nitrospira; Nitrospirales; Nitrospiraceae; uncultured; uncultured bacterium	0.0	0.0	3.0	0.0	0.0	0.0	0.0	0.0	0.0	1.0	0.0	0.0	217.0	44.0	185.0	955.0	1108.0	932.0	0.0	1.0	0.0	0.0	0.0	17.0	5.0	16.0	0.0	0.0	0.0	0.0	8.0	0.0	0.0	0.0	0.0	0.0	0.0	0.0	0.0	0.0	0.0	20.0
OTU561145702	Bacteria; Proteobacteria; Deltaproteobacteria; Desulfobacterales; Desulfobulbaceae; Desulfobulbus; uncultured bacterium	0.0	0.0	0.0	0.0	0.0	0.0	82.0	21.0	6.0	0.0	0.0	0.0	3661.0	281.0	817.0	427.0	337.0	308.0	5.0	1.0	11.0	0.0	0.0	5.0	0.0	7.0	1.0	0.0	0.0	0.0	3.0	1.0	0.0	0.0	0.0	0.0	0.0	0.0	0.0	0.0	2.0	11.0
OTU926581866	Bacteria; Proteobacteria; Deltaproteobacteria; Desulfobacterales; Desulfobulbaceae; Desulfobulbus; uncultured bacterium	0.0	86.0	1.0	1.0	0.0	1.0	168.0	1.0	13.0	1.0	0.0	0.0	1.0	0.0	0.0	999.0	2192.0	730.0	55.0	38.0	62.0	19.0	0.0	0.0	613.0	98.0	38.0	0.0	0.0	0.0	31.0	15.0	0.0	0.0	41.0	44.0	0.0	0.0	0.0	28.0	117.0	2.0
OTU204026325	Bacteria; Acidobacteria; Holophagae; Holophagales; Holophagaceae; uncultured; uncultured bacterium	0.0	5.0	2.0	21.0	8.0	27.0	22.0	25.0	53.0	12.0	31.0	7.0	37.0	32.0	20.0	434.0	558.0	250.0	72.0	111.0	72.0	0.0	1.0	9.0	150.0	398.0	247.0	0.0	0.0	0.0	10.0	14.0	9.0	0.0	73.0	41.0	0.0	0.0	0.0	8.0	44.0	37.0
OTU612624877	Bacteria; Proteobacteria; Deltaproteobacteria; Bdellovibrionales; Bacteriovoracaceae; Deferrisoma; uncultured delta proteobacterium	0.0	0.0	0.0	0.0	0.0	0.0	0.0	0.0	0.0	0.0	0.0	0.0	7.0	18.0	0.0	866.0	27.0	195.0	0.0	0.0	0.0	0.0	0.0	0.0	4.0	292.0	0.0	0.0	0.0	0.0	0.0	0.0	0.0	0.0	0.0	0.0	0.0	0.0	0.0	0.0	0.0	0.0
OTU560243898	Bacteria; Proteobacteria; Deltaproteobacteria; Desulfobacterales; Desulfobulbaceae; Desulfobulbus; uncultured bacterium	0.0	111.0	73.0	0.0	0.0	199.0	27.0	0.0	2.0	0.0	1.0	0.0	115.0	72.0	59.0	991.0	1675.0	1051.0	1385.0	2607.0	1337.0	17.0	0.0	128.0	1881.0	91.0	175.0	1.0	0.0	0.0	179.0	7.0	0.0	0.0	566.0	130.0	0.0	0.0	314.0	0.0	6.0	52.0
OTU2753358	Bacteria; Actinobacteria; Thermoleophilia; Gaiellales; uncultured; uncultured bacterium; uncultured bacterium	0.0	0.0	0.0	0.0	0.0	0.0	0.0	0.0	0.0	0.0	0.0	0.0	0.0	2.0	0.0	340.0	962.0	612.0	1.0	0.0	0.0	0.0	0.0	8.0	0.0	349.0	1.0	0.0	0.0	0.0	4.0	0.0	0.0	0.0	0.0	0.0	0.0	0.0	0.0	0.0	0.0	2.0
OTU308256744	Bacteria; Ignavibacteriae; Ignavibacteria; Ignavibacteriales; SR-FBR-L83; uncultured bacterium; uncultured bacterium	0.0	0.0	0.0	0.0	1.0	0.0	0.0	0.0	2.0	0.0	0.0	0.0	9.0	7.0	11.0	477.0	409.0	1892.0	0.0	0.0	0.0	79.0	0.0	5.0	9.0	14.0	0.0	0.0	0.0	0.0	3.0	0.0	0.0	0.0	0.0	0.0	0.0	0.0	0.0	12.0	1.0	1.0
OTU174346815	Bacteria; Proteobacteria; Gammaproteobacteria; Legionellales; Coxiellaceae; Coxiella; uncultured bacterium	0.0	0.0	0.0	1.0	4.0	1.0	11.0	5.0	13.0	0.0	0.0	4.0	5.0	11.0	19.0	271.0	84.0	158.0	15.0	13.0	3.0	1.0	15.0	5.0	41.0	12.0	6.0	2.0	1.0	0.0	24.0	11.0	4.0	3.0	0.0	26.0	0.0	0.0	0.0	32.0	38.0	7.0
OTU248962793	Bacteria; Planctomycetes; Phycisphaerae; Phycisphaerales; ODP1230B30.02 sediment group; uncultured bacterium; uncultured bacterium	0.0	129.0	27.0	0.0	0.0	68.0	0.0	0.0	0.0	0.0	0.0	0.0	12.0	740.0	0.0	176.0	174.0	199.0	31.0	5.0	15.0	58.0	0.0	47.0	124.0	168.0	89.0	1.0	0.0	0.0	613.0	23.0	0.0	0.0	374.0	25.0	0.0	0.0	0.0	0.0	0.0	75.0
OTU48202983	Bacteria; Proteobacteria; Deltaproteobacteria; Desulfobacterales; Desulfobulbaceae; MSBL7	0.0	6.0	0.0	0.0	0.0	7.0	16.0	0.0	0.0	0.0	0.0	0.0	15.0	18.0	44.0	546.0	94.0	144.0	6.0	0.0	6.0	8.0	0.0	6.0	0.0	66.0	0.0	0.0	0.0	0.0	0.0	5.0	0.0	0.0	0.0	0.0	0.0	0.0	0.0	4.0	0.0	13.0
OTU579550123	Bacteria; Proteobacteria; Deltaproteobacteria; Syntrophobacterales; Syntrophaceae; Syntrophus; Ambiguous_taxa	121.0	57.0	41.0	52.0	30.0	35.0	230.0	134.0	317.0	124.0	142.0	57.0	564.0	304.0	225.0	60.0	35.0	55.0	420.0	300.0	373.0	12.0	30.0	27.0	3.0	0.0	4.0	84.0	65.0	140.0	91.0	57.0	0.0	0.0	34.0	55.0	1.0	0.0	70.0	682.0	1016.0	908.0
OTU244883363	Bacteria; Tenericutes; Mollicutes; NB1-n	16.0	46.0	16.0	94.0	96.0	165.0	787.0	420.0	444.0	96.0	186.0	103.0	1045.0	1494.0	1095.0	419.0	96.0	607.0	66.0	575.0	497.0	52.0	22.0	9.0	5.0	22.0	8.0	55.0	248.0	16.0	212.0	64.0	9.0	0.0	49.0	126.0	29.0	0.0	0.0	1517.0	2538.0	884.0
OTU279153467	Bacteria; Proteobacteria; Alphaproteobacteria; Rhodospirillales; DA111	0.0	12.0	2.0	0.0	0.0	3.0	0.0	0.0	0.0	0.0	0.0	0.0	1.0	2.0	0.0	181.0	240.0	349.0	1.0	3.0	0.0	16.0	0.0	42.0	722.0	1132.0	473.0	0.0	0.0	0.0	82.0	0.0	0.0	0.0	0.0	8.0	0.0	0.0	0.0	0.0	0.0	0.0
OTU942749498	Bacteria; Ignavibacteriae; Ignavibacteria; Ignavibacteriales; PHOS-HE36; uncultured bacterium; uncultured bacterium	84.0	46.0	32.0	17.0	27.0	9.0	212.0	151.0	60.0	197.0	208.0	81.0	271.0	283.0	50.0	284.0	448.0	243.0	478.0	245.0	391.0	40.0	11.0	164.0	44.0	28.0	31.0	51.0	54.0	317.0	52.0	81.0	0.0	0.0	61.0	38.0	85.0	78.0	115.0	1088.0	411.0	566.0
OTU190640473	Bacteria; Proteobacteria; Deltaproteobacteria; Desulfobacterales; Desulfobacteraceae; SEEP-SRB1	119.0	42.0	16.0	31.0	10.0	26.0	33.0	54.0	88.0	77.0	76.0	44.0	89.0	102.0	49.0	137.0	322.0	218.0	245.0	47.0	103.0	11.0	34.0	56.0	106.0	127.0	109.0	315.0	97.0	124.0	62.0	45.0	24.0	0.0	80.0	17.0	37.0	0.0	151.0	107.0	146.0	33.0
OTU938453041	Bacteria; Proteobacteria; Deltaproteobacteria; Desulfobacterales; Desulfobulbaceae; MSBL7; uncultured delta proteobacterium	0.0	0.0	0.0	0.0	0.0	0.0	0.0	0.0	0.0	0.0	0.0	0.0	0.0	0.0	1.0	493.0	33.0	1333.0	0.0	0.0	0.0	0.0	0.0	0.0	1.0	270.0	0.0	0.0	0.0	0.0	0.0	0.0	0.0	1.0	0.0	1.0	0.0	0.0	0.0	0.0	0.0	0.0
OTU792787686	Unassigned	0.0	0.0	0.0	0.0	0.0	0.0	2.0	0.0	0.0	0.0	0.0	0.0	11712.0	1158.0	8450.0	127.0	12.0	69.0	0.0	53.0	0.0	0.0	1.0	0.0	0.0	22.0	0.0	0.0	0.0	0.0	53.0	0.0	0.0	1.0	0.0	0.0	0.0	1.0	1.0	0.0	0.0	8.0
OTU571842678	Bacteria; Proteobacteria; Deltaproteobacteria; Bdellovibrionales; Bacteriovoracaceae; Deferrisoma	0.0	0.0	2.0	0.0	0.0	0.0	7.0	1.0	1.0	0.0	0.0	0.0	618.0	558.0	124.0	113.0	91.0	71.0	191.0	297.0	95.0	0.0	0.0	0.0	1.0	13.0	6.0	0.0	0.0	0.0	0.0	0.0	0.0	0.0	209.0	0.0	1.0	0.0	0.0	0.0	0.0	0.0
OTU313658789	Bacteria; Proteobacteria; Deltaproteobacteria; Desulfobacterales; Desulfobacteraceae; Sva0081 sediment group	1.0	11.0	4.0	3.0	3.0	6.0	5.0	8.0	11.0	5.0	2.0	0.0	10.0	11.0	3.0	189.0	174.0	128.0	22.0	4.0	6.0	13.0	7.0	3.0	26.0	107.0	26.0	5.0	31.0	28.0	32.0	28.0	89.0	0.0	34.0	69.0	0.0	0.0	174.0	1.0	8.0	5.0
OTU91867605	Bacteria; Ignavibacteriae; Ignavibacteria; Ignavibacteriales; BSV26; uncultured bacterium; uncultured bacterium	9.0	20.0	14.0	9.0	7.0	4.0	33.0	71.0	92.0	63.0	79.0	48.0	107.0	55.0	15.0	109.0	3.0	190.0	101.0	57.0	54.0	20.0	50.0	12.0	41.0	6.0	8.0	63.0	164.0	133.0	49.0	54.0	23.0	0.0	42.0	35.0	51.0	148.0	96.0	89.0	125.0	28.0
OTU815071317	Bacteria; Chloroflexi; Anaerolineae; Anaerolineales; Anaerolineaceae; uncultured; uncultured bacterium	10.0	8.0	3.0	4.0	8.0	8.0	74.0	8.0	58.0	7.0	22.0	15.0	80.0	47.0	30.0	1192.0	388.0	512.0	56.0	17.0	74.0	18.0	84.0	85.0	30.0	47.0	48.0	100.0	75.0	131.0	29.0	9.0	0.0	0.0	38.0	150.0	185.0	0.0	80.0	131.0	184.0	58.0
OTU840346014	Bacteria; Proteobacteria; Deltaproteobacteria; Desulfobacterales; Desulfobulbaceae; Desulfocapsa; uncultured bacterium	244.0	465.0	378.0	125.0	55.0	33.0	363.0	954.0	662.0	42.0	89.0	87.0	527.0	422.0	575.0	245.0	386.0	294.0	157.0	248.0	426.0	392.0	195.0	215.0	6.0	18.0	112.0	966.0	1047.0	705.0	1158.0	63.0	61.0	47.0	2597.0	204.0	2543.0	2905.0	2779.0	23.0	50.0	47.0
OTU512182695	Bacteria; Proteobacteria; Deltaproteobacteria; Desulfuromonadales; Geobacteraceae; Geobacter; uncultured bacterium	8.0	187.0	319.0	3.0	3.0	0.0	514.0	239.0	158.0	0.0	5.0	108.0	3424.0	1518.0	525.0	131.0	315.0	546.0	1427.0	2072.0	1004.0	7.0	1.0	3.0	8.0	21.0	139.0	0.0	0.0	5.0	575.0	89.0	23.0	116.0	3601.0	2498.0	0.0	0.0	0.0	90.0	113.0	101.0
OTU367250682	Bacteria; Spirochaetae; Spirochaetes; Spirochaetales; Leptospiraceae; uncultured; uncultured organism	19.0	18.0	11.0	2.0	2.0	3.0	6.0	3.0	9.0	8.0	4.0	0.0	0.0	1.0	1.0	34.0	26.0	31.0	7.0	6.0	10.0	27.0	24.0	27.0	70.0	33.0	28.0	23.0	28.0	65.0	1.0	0.0	0.0	0.0	0.0	58.0	1.0	0.0	0.0	9.0	16.0	3.0
OTU385658550	Bacteria; Chloroflexi; Anaerolineae; Anaerolineales; Anaerolineaceae; Longilinea	217.0	145.0	57.0	32.0	15.0	16.0	64.0	89.0	152.0	85.0	56.0	18.0	62.0	54.0	38.0	452.0	243.0	674.0	203.0	144.0	93.0	18.0	32.0	73.0	342.0	393.0	156.0	16.0	27.0	48.0	158.0	81.0	113.0	0.0	147.0	175.0	16.0	58.0	191.0	198.0	163.0	242.0
OTU503426533	Bacteria; Parcubacteria; Candidatus Moranbacteria; uncultured bacterium; uncultured bacterium; uncultured bacterium; uncultured bacterium	0.0	0.0	0.0	0.0	0.0	2.0	0.0	0.0	0.0	0.0	0.0	0.0	0.0	107.0	0.0	257.0	1192.0	127.0	2.0	0.0	1.0	6.0	0.0	3.0	254.0	184.0	1.0	0.0	0.0	0.0	0.0	0.0	0.0	0.0	0.0	0.0	0.0	0.0	0.0	0.0	0.0	12.0
OTU15148656	Bacteria; Proteobacteria; Deltaproteobacteria; 43F-1404R; Ambiguous_taxa; Ambiguous_taxa; Ambiguous_taxa	0.0	0.0	0.0	0.0	0.0	0.0	0.0	0.0	0.0	0.0	0.0	0.0	0.0	0.0	0.0	216.0	512.0	323.0	0.0	0.0	0.0	3.0	0.0	20.0	0.0	134.0	0.0	0.0	0.0	0.0	0.0	0.0	0.0	0.0	0.0	0.0	0.0	0.0	0.0	0.0	0.0	0.0
OTU239788165	Bacteria; Ignavibacteriae; Ignavibacteria; Ignavibacteriales; BSV26; Ambiguous_taxa; Ambiguous_taxa	3.0	0.0	3.0	0.0	0.0	2.0	0.0	0.0	0.0	0.0	3.0	0.0	0.0	0.0	0.0	270.0	53.0	216.0	0.0	0.0	0.0	2.0	4.0	13.0	146.0	111.0	174.0	10.0	0.0	16.0	9.0	0.0	0.0	0.0	0.0	0.0	0.0	0.0	0.0	2.0	0.0	0.0
OTU728577853	Bacteria; RBG-1 (Zixibacteria); uncultured bacterium; uncultured bacterium; uncultured bacterium; uncultured bacterium; uncultured bacterium	52.0	3.0	1.0	7.0	0.0	0.0	13.0	7.0	25.0	0.0	6.0	6.0	51.0	24.0	7.0	145.0	227.0	117.0	71.0	30.0	206.0	1.0	5.0	8.0	7.0	59.0	20.0	54.0	0.0	51.0	0.0	0.0	0.0	0.0	20.0	47.0	0.0	10.0	53.0	15.0	18.0	3.0
OTU755128238	Bacteria; Firmicutes; Clostridia; Clostridiales; Christensenellaceae; Christensenellaceae R-7 group; uncultured bacterium	76.0	44.0	58.0	10.0	21.0	11.0	97.0	38.0	44.0	97.0	66.0	66.0	47.0	233.0	30.0	194.0	282.0	307.0	58.0	84.0	79.0	134.0	199.0	128.0	127.0	351.0	203.0	195.0	220.0	496.0	256.0	212.0	160.0	0.0	136.0	47.0	176.0	276.0	381.0	52.0	52.0	57.0
OTU182439883	Bacteria; Proteobacteria; Betaproteobacteria; Rhodocyclales; Rhodocyclaceae	0.0	1.0	1.0	0.0	0.0	5.0	0.0	0.0	0.0	0.0	0.0	0.0	0.0	0.0	0.0	212.0	268.0	330.0	1.0	0.0	0.0	2.0	0.0	0.0	449.0	820.0	240.0	0.0	0.0	0.0	12.0	0.0	6.0	0.0	17.0	59.0	0.0	0.0	0.0	0.0	0.0	0.0
OTU533611501	Bacteria; Spirochaetae; Spirochaetes; Spirochaetales; Spirochaetaceae; uncultured; Ambiguous_taxa	1.0	2.0	0.0	1.0	2.0	1.0	18.0	27.0	26.0	3.0	9.0	5.0	28.0	25.0	13.0	80.0	152.0	93.0	36.0	37.0	29.0	6.0	5.0	0.0	70.0	29.0	41.0	21.0	28.0	30.0	9.0	15.0	0.0	0.0	45.0	31.0	0.0	83.0	0.0	38.0	23.0	12.0
OTU868330699	Bacteria; Deferribacteres; Deferribacteres Incertae Sedis; Unknown Order; Unknown Family; Caldithrix; Ambiguous_taxa	1.0	3.0	5.0	0.0	2.0	0.0	9.0	1.0	1.0	5.0	6.0	2.0	11.0	28.0	3.0	77.0	117.0	73.0	2.0	6.0	7.0	7.0	2.0	6.0	106.0	39.0	201.0	21.0	7.0	18.0	30.0	10.0	11.0	0.0	0.0	6.0	0.0	0.0	33.0	4.0	0.0	3.0
OTU103544898	Bacteria; Nitrospirae; Nitrospira; Nitrospirales; FW13; Ambiguous_taxa; Ambiguous_taxa	0.0	0.0	0.0	0.0	0.0	0.0	0.0	0.0	0.0	0.0	0.0	0.0	0.0	0.0	0.0	121.0	135.0	285.0	0.0	0.0	0.0	4.0	0.0	0.0	15.0	63.0	0.0	0.0	0.0	0.0	0.0	0.0	0.0	0.0	0.0	0.0	0.0	0.0	0.0	0.0	0.0	0.0
OTU711885889	Bacteria; Proteobacteria; Deltaproteobacteria; Sva0485	3.0	4.0	3.0	1.0	0.0	0.0	3.0	0.0	2.0	1.0	0.0	1.0	3.0	6.0	0.0	64.0	47.0	65.0	3.0	1.0	9.0	5.0	16.0	18.0	5.0	32.0	10.0	15.0	14.0	0.0	4.0	0.0	0.0	0.0	31.0	0.0	0.0	0.0	0.0	4.0	1.0	3.0
OTU71720968	Bacteria; Proteobacteria; Deltaproteobacteria; Desulfobacterales; Desulfobacteraceae; Desulfobacterium	20.0	21.0	30.0	10.0	2.0	9.0	28.0	26.0	31.0	4.0	15.0	8.0	8.0	22.0	3.0	144.0	50.0	164.0	39.0	52.0	53.0	39.0	38.0	61.0	104.0	129.0	202.0	48.0	176.0	40.0	121.0	30.0	0.0	0.0	17.0	20.0	54.0	0.0	0.0	3.0	9.0	5.0
OTU90279564	Bacteria; Proteobacteria; Deltaproteobacteria; Desulfobacterales; Desulfobacteraceae	10.0	16.0	10.0	10.0	20.0	35.0	54.0	44.0	63.0	135.0	91.0	29.0	73.0	52.0	104.0	78.0	56.0	94.0	98.0	38.0	17.0	37.0	104.0	38.0	14.0	15.0	24.0	274.0	135.0	158.0	88.0	110.0	14.0	93.0	58.0	54.0	72.0	0.0	1.0	26.0	16.0	7.0
OTU408929487	Bacteria; Proteobacteria; Betaproteobacteria; Rhodocyclales; Rhodocyclaceae; Sulfuritalea; uncultured Rhodocyclaceae bacterium	0.0	3.0	2.0	0.0	0.0	0.0	0.0	0.0	0.0	0.0	0.0	0.0	0.0	0.0	0.0	114.0	10.0	957.0	0.0	4.0	0.0	12.0	0.0	0.0	717.0	482.0	360.0	0.0	0.0	0.0	26.0	0.0	8.0	0.0	21.0	0.0	0.0	0.0	0.0	0.0	0.0	1.0
OTU399548099	Bacteria; Proteobacteria; Gammaproteobacteria; Legionellales; Coxiellaceae; Coxiella	1.0	0.0	1.0	2.0	2.0	0.0	5.0	20.0	47.0	0.0	1.0	0.0	2.0	0.0	2.0	204.0	21.0	40.0	7.0	7.0	0.0	0.0	3.0	11.0	57.0	31.0	426.0	0.0	3.0	13.0	23.0	5.0	4.0	0.0	0.0	7.0	0.0	19.0	147.0	7.0	13.0	4.0
OTU22004494	Bacteria; Proteobacteria; Deltaproteobacteria; Bradymonadales; uncultured bacterium; uncultured bacterium; uncultured bacterium	0.0	0.0	0.0	0.0	1.0	0.0	1.0	5.0	2.0	1.0	2.0	4.0	6.0	7.0	1.0	16.0	9.0	11.0	10.0	4.0	1.0	0.0	4.0	0.0	15.0	11.0	11.0	8.0	0.0	3.0	6.0	0.0	0.0	0.0	0.0	0.0	0.0	0.0	0.0	6.0	4.0	4.0
OTU920461138	Unassigned	0.0	0.0	1.0	0.0	1.0	1.0	4.0	4.0	14.0	0.0	0.0	3.0	16.0	13.0	16.0	26.0	22.0	34.0	25.0	37.0	24.0	0.0	4.0	0.0	0.0	16.0	1.0	0.0	0.0	0.0	0.0	0.0	0.0	0.0	0.0	0.0	0.0	0.0	0.0	8.0	10.0	4.0
OTU876818085	Bacteria; Proteobacteria; Deltaproteobacteria; Desulfobacterales; Desulfobulbaceae; Desulfobulbus; uncultured bacterium	0.0	0.0	0.0	0.0	0.0	0.0	1.0	0.0	0.0	0.0	0.0	11.0	0.0	0.0	0.0	278.0	7.0	437.0	27.0	76.0	164.0	0.0	0.0	0.0	0.0	0.0	0.0	0.0	0.0	0.0	0.0	10.0	13.0	0.0	0.0	0.0	0.0	0.0	0.0	0.0	0.0	0.0
OTU876475544	Bacteria; Spirochaetae; Spirochaetes; Spirochaetales; Spirochaetaceae; Treponema	0.0	0.0	0.0	0.0	0.0	0.0	0.0	0.0	0.0	0.0	0.0	0.0	0.0	0.0	0.0	21.0	4.0	6.0	0.0	0.0	0.0	0.0	0.0	0.0	2.0	2.0	0.0	0.0	0.0	0.0	143.0	0.0	0.0	0.0	0.0	0.0	0.0	0.0	0.0	0.0	0.0	0.0
OTU688597868	Bacteria; Proteobacteria; Deltaproteobacteria; Desulfobacterales; Desulfobacteraceae; uncultured	1230.0	1599.0	1054.0	341.0	181.0	227.0	402.0	699.0	904.0	221.0	276.0	466.0	433.0	534.0	126.0	58.0	48.0	37.0	331.0	201.0	257.0	522.0	614.0	734.0	15.0	32.0	73.0	1644.0	1544.0	2999.0	1717.0	395.0	224.0	12.0	842.0	785.0	750.0	480.0	377.0	286.0	394.0	352.0
OTU41971763	Bacteria; Proteobacteria; Deltaproteobacteria; Desulfobacterales; Desulfobacteraceae; uncultured; uncultured bacterium	544.0	1190.0	1222.0	138.0	85.0	143.0	366.0	512.0	486.0	166.0	352.0	233.0	379.0	494.0	210.0	92.0	195.0	151.0	225.0	218.0	220.0	660.0	436.0	764.0	59.0	109.0	212.0	1440.0	2041.0	1618.0	1145.0	315.0	240.0	22.0	1232.0	493.0	123.0	66.0	170.0	136.0	191.0	243.0
OTU202381795	Bacteria; Proteobacteria; Deltaproteobacteria; Desulfobacterales; Desulfobacteraceae; Desulfatirhabdium; Ambiguous_taxa	46.0	75.0	51.0	1.0	1.0	4.0	82.0	100.0	103.0	9.0	15.0	10.0	11.0	34.0	6.0	52.0	75.0	29.0	35.0	33.0	29.0	50.0	31.0	41.0	24.0	51.0	163.0	58.0	44.0	35.0	83.0	3.0	0.0	9.0	84.0	40.0	134.0	0.0	0.0	30.0	34.0	50.0
OTU862669508	Bacteria; Acidobacteria; Holophagae; Holophagales; Holophagaceae; Geothrix; uncultured bacterium	0.0	0.0	0.0	0.0	0.0	0.0	11.0	0.0	1.0	0.0	0.0	0.0	0.0	0.0	0.0	504.0	422.0	2.0	0.0	0.0	0.0	1.0	0.0	19.0	157.0	293.0	33.0	0.0	0.0	0.0	0.0	0.0	0.0	0.0	0.0	0.0	0.0	0.0	0.0	0.0	0.0	1.0
OTU503190629	Bacteria; Chloroflexi; Anaerolineae; Anaerolineales; Anaerolineaceae	29.0	61.0	134.0	19.0	3.0	4.0	16.0	6.0	17.0	7.0	1.0	3.0	28.0	16.0	14.0	103.0	227.0	102.0	21.0	65.0	70.0	3.0	0.0	51.0	142.0	82.0	189.0	177.0	21.0	92.0	15.0	6.0	11.0	0.0	24.0	64.0	0.0	0.0	0.0	13.0	22.0	38.0
OTU763309973	Bacteria; Proteobacteria; Deltaproteobacteria; Desulfobacterales; Desulfobulbaceae; Desulfurivibrio; uncultured bacterium	0.0	4.0	4.0	6.0	0.0	4.0	250.0	387.0	283.0	0.0	4.0	2.0	199.0	238.0	304.0	240.0	455.0	174.0	272.0	366.0	705.0	0.0	0.0	0.0	59.0	17.0	179.0	0.0	0.0	0.0	410.0	57.0	4.0	1.0	2.0	5.0	0.0	0.0	0.0	55.0	168.0	185.0
OTU15233432	Bacteria; Peregrinibacteria; uncultured bacterium; uncultured bacterium; uncultured bacterium; uncultured bacterium; uncultured bacterium	3.0	4.0	4.0	25.0	0.0	19.0	0.0	4.0	0.0	1.0	8.0	0.0	0.0	0.0	0.0	37.0	205.0	18.0	16.0	8.0	15.0	4.0	0.0	6.0	0.0	2.0	0.0	0.0	5.0	13.0	0.0	0.0	0.0	0.0	19.0	0.0	0.0	0.0	0.0	0.0	0.0	0.0
OTU236203289	Bacteria; Proteobacteria; Deltaproteobacteria; Desulfobacterales; Desulfobulbaceae; Desulfurivibrio; uncultured bacterium	1.0	17.0	7.0	0.0	0.0	2.0	1.0	1.0	1.0	1.0	0.0	0.0	15.0	43.0	1.0	248.0	283.0	277.0	28.0	7.0	25.0	0.0	0.0	0.0	781.0	446.0	2388.0	0.0	0.0	0.0	362.0	20.0	24.0	0.0	1284.0	450.0	0.0	0.0	112.0	0.0	25.0	8.0
OTU346736272	Bacteria; Nitrospirae; Nitrospira; Nitrospirales; Nitrospiraceae; uncultured; uncultured bacterium	13.0	15.0	5.0	10.0	4.0	2.0	0.0	0.0	0.0	291.0	14.0	9.0	21.0	76.0	90.0	207.0	87.0	5.0	25.0	0.0	2.0	51.0	25.0	20.0	16.0	88.0	1.0	149.0	163.0	80.0	172.0	5.0	3.0	0.0	0.0	0.0	132.0	0.0	0.0	0.0	2.0	0.0
OTU579423456	Bacteria; Proteobacteria; Deltaproteobacteria; Desulfobacterales; Desulfobulbaceae; MSBL7	0.0	46.0	167.0	0.0	0.0	25.0	3.0	0.0	0.0	0.0	0.0	0.0	0.0	4.0	0.0	64.0	103.0	88.0	15.0	4.0	0.0	36.0	0.0	13.0	7.0	27.0	14.0	0.0	0.0	0.0	21.0	0.0	0.0	0.0	384.0	0.0	0.0	0.0	0.0	0.0	0.0	26.0
OTU319576215	Bacteria; Proteobacteria; Deltaproteobacteria; Desulfobacterales; Desulfobulbaceae; uncultured; Ambiguous_taxa	21.0	1.0	3.0	21.0	6.0	8.0	6.0	6.0	60.0	61.0	35.0	16.0	103.0	42.0	75.0	31.0	85.0	11.0	64.0	1.0	3.0	55.0	129.0	126.0	198.0	7.0	231.0	186.0	161.0	383.0	317.0	20.0	36.0	24.0	13.0	15.0	1390.0	619.0	614.0	16.0	291.0	4.0
OTU561699190	Archaea; Euryarchaeota; Thermoplasmata; Thermoplasmatales; ASC21; uncultured archaeon; uncultured archaeon	5.0	11.0	6.0	5.0	4.0	2.0	132.0	62.0	57.0	107.0	78.0	105.0	26.0	52.0	24.0	27.0	155.0	35.0	39.0	251.0	368.0	15.0	5.0	12.0	1.0	1.0	7.0	1.0	16.0	11.0	24.0	8.0	0.0	0.0	58.0	2.0	0.0	0.0	0.0	43.0	24.0	45.0
OTU993393122	Bacteria; Proteobacteria; Deltaproteobacteria; Desulfobacterales; Desulfobulbaceae; Desulfurivibrio; uncultured bacterium	0.0	0.0	3.0	6.0	9.0	10.0	33.0	133.0	88.0	0.0	0.0	0.0	8.0	6.0	4.0	26.0	31.0	16.0	48.0	101.0	104.0	0.0	0.0	0.0	226.0	22.0	384.0	0.0	0.0	0.0	54.0	22.0	19.0	0.0	6.0	83.0	0.0	0.0	0.0	11.0	32.0	34.0
OTU172412142	Bacteria; Proteobacteria; Epsilonproteobacteria; Campylobacterales; Helicobacteraceae; Sulfuricurvum	439.0	12.0	172.0	1199.0	4724.0	688.0	798.0	11366.0	153.0	30.0	39.0	71.0	9356.0	4565.0	3671.0	11.0	208.0	2436.0	34.0	124.0	2822.0	2180.0	35.0	188.0	8.0	28.0	4.0	143.0	20.0	29.0	510.0	39.0	60.0	1.0	5.0	7.0	0.0	64.0	14.0	68.0	211.0	3259.0
OTU165806843	Bacteria; RBG-1 (Zixibacteria); uncultured bacterium; uncultured bacterium; uncultured bacterium; uncultured bacterium; uncultured bacterium	10.0	10.0	12.0	10.0	3.0	5.0	18.0	15.0	17.0	3.0	5.0	1.0	28.0	8.0	12.0	30.0	106.0	33.0	19.0	27.0	23.0	0.0	7.0	16.0	6.0	42.0	1.0	0.0	3.0	65.0	2.0	0.0	17.0	0.0	13.0	8.0	0.0	0.0	68.0	9.0	2.0	7.0
OTU298593670	Bacteria; Proteobacteria; Betaproteobacteria; Hydrogenophilales; Hydrogenophilaceae; uncultured	0.0	0.0	0.0	0.0	0.0	0.0	0.0	0.0	0.0	0.0	0.0	0.0	0.0	0.0	0.0	27.0	234.0	163.0	0.0	0.0	0.0	1.0	0.0	2.0	65.0	164.0	40.0	0.0	0.0	0.0	3.0	0.0	12.0	0.0	0.0	0.0	0.0	0.0	0.0	0.0	0.0	0.0
OTU131170383	Bacteria; Spirochaetae; Spirochaetes; Spirochaetales; Spirochaetaceae; uncultured; Ambiguous_taxa	19.0	4.0	20.0	55.0	35.0	13.0	21.0	7.0	10.0	10.0	10.0	7.0	7.0	6.0	11.0	83.0	35.0	89.0	24.0	64.0	54.0	2.0	17.0	6.0	37.0	19.0	77.0	54.0	22.0	30.0	12.0	12.0	0.0	10.0	145.0	182.0	0.0	0.0	0.0	40.0	54.0	16.0
OTU177634508	Bacteria; Proteobacteria; Deltaproteobacteria; Myxococcales; VHS-B3-70; uncultured bacterium; uncultured bacterium	0.0	0.0	0.0	0.0	0.0	0.0	0.0	0.0	1.0	0.0	0.0	0.0	3.0	0.0	0.0	203.0	105.0	65.0	6.0	0.0	0.0	0.0	0.0	0.0	184.0	53.0	0.0	0.0	0.0	0.0	143.0	0.0	0.0	0.0	0.0	0.0	0.0	0.0	0.0	3.0	2.0	0.0
OTU233668191	Bacteria; Proteobacteria; Deltaproteobacteria; Desulfobacterales; Desulfobacteraceae; Sva0081 sediment group	39.0	32.0	12.0	9.0	19.0	7.0	11.0	19.0	61.0	31.0	17.0	19.0	99.0	112.0	52.0	125.0	69.0	88.0	30.0	13.0	26.0	29.0	20.0	25.0	44.0	208.0	82.0	241.0	108.0	121.0	81.0	49.0	56.0	0.0	167.0	199.0	35.0	138.0	192.0	19.0	21.0	45.0
OTU687712462	Bacteria; Acidobacteria; Subgroup 6; uncultured bacterium; uncultured bacterium; uncultured bacterium; uncultured bacterium	101.0	109.0	82.0	94.0	43.0	43.0	89.0	110.0	121.0	199.0	244.0	278.0	646.0	249.0	103.0	70.0	37.0	55.0	247.0	287.0	360.0	91.0	620.0	107.0	54.0	164.0	145.0	154.0	227.0	285.0	303.0	44.0	43.0	70.0	331.0	248.0	165.0	169.0	101.0	111.0	103.0	68.0
OTU408114194	Bacteria; Proteobacteria; Deltaproteobacteria; Syntrophobacterales; Syntrophaceae; Syntrophus; Ambiguous_taxa	24.0	179.0	160.0	78.0	69.0	71.0	283.0	408.0	444.0	60.0	115.0	105.0	289.0	232.0	186.0	64.0	54.0	64.0	425.0	456.0	115.0	71.0	61.0	101.0	67.0	207.0	102.0	37.0	164.0	108.0	233.0	45.0	47.0	44.0	434.0	74.0	128.0	151.0	223.0	316.0	516.0	305.0
OTU855264487	Bacteria; Bacteroidetes; Sphingobacteriia; Sphingobacteriales; Lentimicrobiaceae; uncultured bacterium; uncultured bacterium	0.0	0.0	0.0	0.0	0.0	0.0	0.0	0.0	0.0	0.0	1.0	0.0	0.0	0.0	0.0	80.0	63.0	43.0	0.0	0.0	0.0	0.0	0.0	0.0	57.0	201.0	42.0	0.0	0.0	6.0	4.0	0.0	0.0	0.0	0.0	0.0	0.0	0.0	39.0	0.0	0.0	0.0
OTU788043493	Bacteria; Firmicutes; Clostridia; Halanaerobiales; ODP1230B8.23; uncultured bacterium; uncultured bacterium	0.0	0.0	0.0	0.0	0.0	2.0	0.0	0.0	7.0	0.0	0.0	0.0	1.0	6.0	3.0	22.0	7.0	13.0	6.0	0.0	5.0	0.0	1.0	1.0	15.0	27.0	6.0	0.0	0.0	2.0	3.0	1.0	4.0	0.0	0.0	0.0	0.0	0.0	0.0	3.0	61.0	6.0
OTU123424089	Bacteria; Chloroflexi; Anaerolineae; Anaerolineales; Anaerolineaceae; uncultured; uncultured bacterium	0.0	13.0	9.0	0.0	3.0	0.0	1.0	0.0	0.0	5.0	0.0	9.0	0.0	9.0	0.0	4.0	15.0	15.0	11.0	17.0	47.0	0.0	1.0	0.0	5.0	7.0	2.0	0.0	37.0	0.0	20.0	0.0	0.0	0.0	0.0	0.0	0.0	0.0	0.0	0.0	6.0	13.0
OTU892193007	Archaea; Euryarchaeota; Thermoplasmata; Thermoplasmatales; Terrestrial Miscellaneous Gp(TMEG); uncultured archaeon; uncultured archaeon	68.0	19.0	10.0	9.0	10.0	15.0	26.0	12.0	94.0	134.0	112.0	144.0	136.0	125.0	40.0	50.0	17.0	75.0	45.0	89.0	52.0	9.0	30.0	17.0	0.0	4.0	8.0	24.0	50.0	41.0	149.0	128.0	4.0	0.0	30.0	19.0	21.0	16.0	0.0	121.0	107.0	72.0
OTU443381784	Bacteria; Proteobacteria; Deltaproteobacteria; Desulfobacterales; Desulfobulbaceae; Desulfobulbus; uncultured bacterium	0.0	0.0	3.0	0.0	0.0	0.0	0.0	0.0	0.0	0.0	0.0	0.0	0.0	0.0	0.0	24.0	4.0	23.0	65.0	0.0	0.0	0.0	0.0	0.0	8.0	21.0	0.0	0.0	0.0	0.0	4.0	0.0	0.0	0.0	0.0	0.0	0.0	0.0	0.0	0.0	0.0	1.0
OTU322597502	Bacteria; Proteobacteria; Deltaproteobacteria; Desulfobacterales; Desulfobacteraceae; uncultured	0.0	4.0	7.0	1.0	1.0	4.0	46.0	61.0	51.0	16.0	5.0	17.0	49.0	84.0	22.0	12.0	27.0	20.0	59.0	41.0	15.0	1.0	29.0	45.0	22.0	8.0	18.0	67.0	37.0	0.0	11.0	10.0	1.0	0.0	0.0	0.0	0.0	0.0	0.0	6.0	2.0	20.0
OTU785913938	Bacteria; Chloroflexi; Anaerolineae; Anaerolineales; Anaerolineaceae; uncultured; uncultured bacterium	2.0	0.0	5.0	3.0	0.0	4.0	2.0	10.0	6.0	13.0	3.0	0.0	134.0	28.0	59.0	95.0	11.0	127.0	4.0	28.0	50.0	21.0	11.0	21.0	45.0	13.0	39.0	11.0	25.0	70.0	10.0	15.0	7.0	1.0	0.0	0.0	69.0	119.0	20.0	25.0	32.0	27.0
OTU100806075	Bacteria; Proteobacteria; Deltaproteobacteria; Desulfobacterales; Desulfobulbaceae; Desulfocapsa	24.0	5.0	2.0	82.0	101.0	78.0	38.0	108.0	84.0	41.0	75.0	148.0	10.0	21.0	15.0	26.0	54.0	15.0	96.0	116.0	59.0	2.0	9.0	30.0	7.0	5.0	42.0	15.0	39.0	18.0	43.0	56.0	159.0	0.0	1.0	75.0	0.0	0.0	13.0	114.0	257.0	125.0
OTU316378655	Bacteria; Omnitrophica; Ambiguous_taxa; Ambiguous_taxa; Ambiguous_taxa; Ambiguous_taxa; Ambiguous_taxa	0.0	4.0	10.0	6.0	7.0	7.0	30.0	4.0	2.0	37.0	8.0	21.0	40.0	46.0	4.0	2.0	18.0	6.0	18.0	5.0	5.0	22.0	42.0	46.0	3.0	9.0	24.0	73.0	343.0	181.0	20.0	26.0	0.0	0.0	0.0	0.0	0.0	93.0	0.0	8.0	27.0	4.0
OTU802922906	Bacteria; Deferribacteres; Deferribacteres Incertae Sedis; Unknown Order; Unknown Family; Caldithrix; uncultured bacterium	1.0	0.0	1.0	2.0	0.0	1.0	4.0	0.0	0.0	9.0	6.0	4.0	2.0	0.0	1.0	9.0	10.0	15.0	6.0	0.0	2.0	11.0	7.0	9.0	1.0	0.0	17.0	58.0	27.0	66.0	10.0	0.0	0.0	0.0	0.0	0.0	0.0	0.0	0.0	1.0	0.0	3.0
OTU101687971	Bacteria; Cyanobacteria; Melainabacteria; Gastranaerophilales; uncultured organism; uncultured organism; uncultured organism	0.0	0.0	0.0	0.0	0.0	0.0	1.0	0.0	5.0	0.0	0.0	0.0	193.0	8.0	1.0	2.0	0.0	0.0	0.0	4.0	164.0	0.0	0.0	0.0	1.0	0.0	0.0	0.0	0.0	14.0	0.0	20.0	0.0	0.0	0.0	0.0	0.0	0.0	0.0	0.0	0.0	13.0
OTU707292254	Bacteria; Acidobacteria; Solibacteres; Solibacterales; Solibacteraceae (Subgroup 3); Paludibaculum; uncultured bacterium	38.0	35.0	50.0	25.0	9.0	10.0	12.0	16.0	12.0	16.0	8.0	15.0	5.0	5.0	2.0	44.0	53.0	46.0	95.0	42.0	46.0	23.0	21.0	10.0	12.0	9.0	10.0	253.0	32.0	110.0	20.0	4.0	0.0	0.0	31.0	72.0	0.0	0.0	0.0	4.0	5.0	5.0
OTU675413280	Bacteria; Proteobacteria; Gammaproteobacteria; Legionellales; Coxiellaceae; Coxiella; uncultured bacterium	21.0	2.0	2.0	2.0	3.0	2.0	1.0	0.0	0.0	10.0	4.0	1.0	2.0	4.0	17.0	80.0	4.0	13.0	0.0	7.0	2.0	9.0	7.0	3.0	142.0	6.0	8.0	4.0	30.0	0.0	49.0	16.0	0.0	0.0	0.0	1.0	0.0	0.0	0.0	4.0	8.0	4.0
OTU80509309	Unassigned	9.0	2.0	7.0	0.0	1.0	0.0	602.0	24.0	1.0	2.0	2.0	3.0	177.0	28.0	198.0	110.0	10.0	61.0	29.0	537.0	199.0	5.0	3.0	1.0	7.0	67.0	5.0	0.0	0.0	0.0	4.0	0.0	14.0	0.0	0.0	2.0	0.0	0.0	0.0	76.0	83.0	118.0
OTU244646468	Bacteria; Microgenomates; Candidatus Woesebacteria	0.0	0.0	0.0	0.0	0.0	0.0	0.0	0.0	0.0	0.0	0.0	0.0	0.0	0.0	0.0	102.0	19.0	16.0	0.0	0.0	0.0	0.0	0.0	1.0	47.0	57.0	2.0	0.0	0.0	0.0	2.0	0.0	0.0	0.0	0.0	0.0	0.0	0.0	0.0	0.0	0.0	0.0
OTU478830950	Bacteria; Proteobacteria; Deltaproteobacteria; Myxococcales; MidBa8	0.0	1.0	0.0	1.0	1.0	3.0	3.0	1.0	6.0	6.0	4.0	0.0	2.0	0.0	1.0	11.0	24.0	12.0	4.0	2.0	2.0	5.0	11.0	13.0	2.0	0.0	1.0	7.0	20.0	0.0	0.0	0.0	0.0	0.0	0.0	0.0	0.0	0.0	0.0	10.0	7.0	4.0
OTU336245488	Bacteria; Bacteroidetes; Bacteroidia; Bacteroidales; Marinilabiaceae; uncultured; Ambiguous_taxa	0.0	0.0	0.0	7.0	11.0	10.0	28.0	26.0	18.0	16.0	39.0	2.0	39.0	21.0	9.0	23.0	40.0	12.0	40.0	55.0	30.0	3.0	7.0	4.0	0.0	0.0	0.0	56.0	14.0	28.0	8.0	31.0	0.0	0.0	0.0	0.0	0.0	0.0	0.0	8.0	21.0	11.0
OTU477885012	Unassigned	0.0	2.0	0.0	0.0	0.0	0.0	0.0	0.0	0.0	0.0	0.0	0.0	0.0	0.0	0.0	212.0	10.0	2.0	0.0	0.0	0.0	3.0	0.0	3.0	6.0	50.0	0.0	0.0	0.0	0.0	56.0	12.0	0.0	0.0	0.0	0.0	0.0	0.0	0.0	0.0	0.0	1.0
OTU585496185	Bacteria; Bacteroidetes; Bacteroidia; Bacteroidales; Marinilabiaceae; uncultured; Ambiguous_taxa	0.0	3.0	0.0	6.0	0.0	16.0	2.0	20.0	11.0	3.0	9.0	6.0	14.0	7.0	1.0	31.0	58.0	7.0	3.0	18.0	28.0	13.0	5.0	8.0	0.0	0.0	1.0	9.0	0.0	41.0	0.0	0.0	0.0	0.0	1.0	0.0	0.0	0.0	0.0	2.0	14.0	7.0
OTU675516459	Bacteria; Proteobacteria; Alphaproteobacteria; Parvularculales; Parvularculaceae	0.0	0.0	0.0	0.0	0.0	0.0	0.0	0.0	0.0	0.0	0.0	0.0	0.0	2.0	0.0	4.0	3.0	31.0	0.0	0.0	0.0	0.0	0.0	0.0	0.0	132.0	0.0	0.0	0.0	0.0	0.0	0.0	0.0	0.0	0.0	0.0	0.0	0.0	0.0	0.0	0.0	0.0
OTU665004587	Bacteria; Chloroflexi; Anaerolineae; Anaerolineales; Anaerolineaceae; Leptolinea; uncultured bacterium	0.0	3.0	0.0	0.0	0.0	0.0	0.0	0.0	0.0	0.0	0.0	0.0	2.0	1.0	0.0	112.0	0.0	0.0	0.0	12.0	1.0	7.0	1.0	0.0	0.0	0.0	0.0	0.0	0.0	0.0	8.0	4.0	0.0	0.0	0.0	0.0	0.0	0.0	0.0	1.0	2.0	1.0
OTU240442663	Bacteria; Spirochaetae; Spirochaetes; Spirochaetales; Spirochaetaceae; Spirochaeta 2; uncultured organism	3.0	7.0	1.0	1.0	9.0	2.0	31.0	10.0	12.0	17.0	11.0	3.0	3.0	8.0	4.0	40.0	15.0	45.0	7.0	4.0	16.0	19.0	21.0	27.0	32.0	65.0	22.0	27.0	28.0	46.0	31.0	0.0	0.0	0.0	0.0	1.0	0.0	0.0	0.0	9.0	18.0	33.0
OTU356138195	Bacteria; Proteobacteria; Deltaproteobacteria; Desulfarculales; Desulfarculaceae; Desulfatiglans	11.0	32.0	8.0	13.0	1.0	11.0	6.0	13.0	15.0	19.0	12.0	0.0	8.0	20.0	3.0	24.0	17.0	21.0	34.0	13.0	36.0	10.0	13.0	10.0	11.0	33.0	17.0	8.0	10.0	10.0	66.0	7.0	0.0	9.0	99.0	80.0	180.0	0.0	0.0	39.0	20.0	21.0
OTU876252967	Bacteria; Nitrospirae; Nitrospira; Nitrospirales; Nitrospiraceae; uncultured; uncultured bacterium	0.0	0.0	0.0	0.0	0.0	0.0	24.0	143.0	0.0	60.0	16.0	0.0	167.0	1580.0	1406.0	0.0	0.0	0.0	10.0	0.0	0.0	0.0	0.0	0.0	0.0	0.0	0.0	0.0	65.0	0.0	14.0	1.0	0.0	0.0	0.0	0.0	0.0	0.0	0.0	0.0	0.0	0.0
OTU472772346	Bacteria; Fibrobacteres; Fibrobacteria; Fibrobacterales; FD035; uncultured bacterium; uncultured bacterium	0.0	0.0	0.0	4.0	1.0	0.0	0.0	0.0	0.0	1.0	3.0	1.0	0.0	0.0	0.0	7.0	0.0	8.0	0.0	5.0	0.0	0.0	3.0	5.0	12.0	5.0	18.0	3.0	31.0	20.0	2.0	10.0	0.0	0.0	13.0	0.0	0.0	0.0	0.0	2.0	0.0	0.0
OTU723124145	Unassigned	0.0	0.0	0.0	1.0	5.0	0.0	0.0	0.0	0.0	0.0	0.0	0.0	0.0	3.0	0.0	4.0	23.0	0.0	0.0	28.0	8.0	0.0	5.0	0.0	0.0	0.0	0.0	24.0	0.0	65.0	0.0	3.0	0.0	0.0	0.0	0.0	0.0	0.0	0.0	0.0	0.0	1.0
OTU896903540	Unassigned	0.0	0.0	0.0	0.0	0.0	0.0	0.0	0.0	0.0	0.0	0.0	0.0	0.0	0.0	0.0	1.0	0.0	9.0	0.0	0.0	0.0	0.0	0.0	0.0	23.0	222.0	0.0	0.0	0.0	0.0	0.0	0.0	0.0	0.0	0.0	0.0	0.0	0.0	0.0	0.0	0.0	0.0
OTU56913447	Bacteria; Proteobacteria; Deltaproteobacteria; Bdellovibrionales; Bacteriovoracaceae; Deferrisoma; uncultured delta proteobacterium	0.0	5.0	11.0	0.0	0.0	0.0	36.0	34.0	64.0	0.0	1.0	0.0	105.0	50.0	16.0	47.0	25.0	29.0	18.0	169.0	258.0	0.0	0.0	0.0	9.0	37.0	1.0	0.0	0.0	0.0	9.0	0.0	0.0	0.0	0.0	0.0	0.0	0.0	0.0	10.0	36.0	28.0
OTU829463647	Unassigned	0.0	9.0	0.0	0.0	0.0	0.0	11.0	0.0	25.0	0.0	1.0	0.0	15.0	5.0	0.0	30.0	0.0	8.0	0.0	0.0	0.0	1.0	0.0	0.0	165.0	48.0	0.0	0.0	0.0	0.0	12.0	8.0	0.0	0.0	0.0	0.0	0.0	0.0	0.0	5.0	4.0	14.0
OTU275840785	Bacteria; Bacteroidetes; Sphingobacteriia; Sphingobacteriales; uncultured	1.0	0.0	0.0	0.0	0.0	0.0	3.0	0.0	0.0	0.0	0.0	0.0	0.0	0.0	0.0	62.0	13.0	53.0	0.0	5.0	14.0	0.0	2.0	0.0	4.0	3.0	11.0	4.0	9.0	14.0	0.0	0.0	0.0	0.0	0.0	0.0	0.0	0.0	0.0	0.0	8.0	0.0
OTU773195359	Bacteria; Latescibacteria; uncultured bacterium; uncultured bacterium; uncultured bacterium; uncultured bacterium; uncultured bacterium	0.0	0.0	0.0	0.0	0.0	0.0	17.0	9.0	8.0	0.0	0.0	0.0	36.0	15.0	31.0	16.0	45.0	19.0	11.0	199.0	77.0	0.0	0.0	0.0	0.0	0.0	0.0	0.0	0.0	0.0	0.0	0.0	0.0	0.0	2.0	0.0	0.0	0.0	0.0	22.0	11.0	12.0
OTU74108717	Bacteria; Proteobacteria; Alphaproteobacteria; Magnetococcales; Magnetococcaceae; Magnetococcus; uncultured proteobacterium	0.0	0.0	1.0	0.0	0.0	24.0	1.0	0.0	0.0	0.0	0.0	0.0	0.0	104.0	0.0	10.0	12.0	1.0	173.0	0.0	1.0	0.0	0.0	36.0	36.0	566.0	38.0	0.0	0.0	0.0	15.0	0.0	17.0	0.0	0.0	0.0	0.0	0.0	38.0	0.0	0.0	69.0
OTU391907412	Bacteria; Deferribacteres; Deferribacteres Incertae Sedis; Unknown Order; Unknown Family; Caldithrix; uncultured bacterium	5.0	1.0	1.0	4.0	3.0	7.0	0.0	6.0	15.0	30.0	11.0	4.0	11.0	10.0	6.0	83.0	9.0	99.0	20.0	25.0	15.0	4.0	17.0	17.0	69.0	153.0	59.0	14.0	14.0	49.0	9.0	13.0	0.0	0.0	44.0	0.0	128.0	0.0	0.0	25.0	9.0	4.0
OTU772191547	Bacteria; Aminicenantes; uncultured bacterium; uncultured bacterium; uncultured bacterium; uncultured bacterium; uncultured bacterium	39.0	176.0	30.0	2.0	0.0	1.0	5.0	2.0	2.0	23.0	54.0	2.0	0.0	0.0	1.0	19.0	3.0	43.0	3.0	0.0	4.0	10.0	4.0	71.0	11.0	7.0	0.0	63.0	18.0	62.0	0.0	1.0	0.0	0.0	0.0	0.0	0.0	0.0	0.0	0.0	1.0	0.0
OTU212512770	Bacteria; Bacteroidetes; Bacteroidetes BD2-2	0.0	0.0	0.0	0.0	1.0	7.0	36.0	9.0	47.0	0.0	5.0	9.0	0.0	0.0	0.0	103.0	43.0	117.0	0.0	2.0	0.0	0.0	0.0	2.0	4.0	3.0	2.0	12.0	0.0	0.0	0.0	0.0	0.0	0.0	0.0	0.0	0.0	0.0	0.0	4.0	13.0	2.0
OTU900223010	Bacteria; TM6 (Dependentiae)	0.0	0.0	0.0	0.0	0.0	0.0	2.0	0.0	0.0	0.0	0.0	0.0	0.0	0.0	0.0	110.0	0.0	54.0	0.0	0.0	0.0	0.0	0.0	0.0	71.0	2.0	0.0	0.0	0.0	0.0	2.0	0.0	0.0	0.0	0.0	0.0	0.0	0.0	0.0	0.0	0.0	0.0
OTU192512872	Bacteria; Proteobacteria; Deltaproteobacteria; Bdellovibrionales; Bacteriovoracaceae; Deferrisoma	0.0	29.0	13.0	0.0	0.0	0.0	39.0	52.0	96.0	0.0	2.0	0.0	3.0	91.0	7.0	26.0	35.0	38.0	27.0	240.0	199.0	19.0	0.0	7.0	82.0	259.0	19.0	0.0	0.0	0.0	410.0	0.0	0.0	0.0	88.0	3.0	0.0	0.0	58.0	7.0	1.0	38.0
OTU526834975	Bacteria; Proteobacteria; Gammaproteobacteria; Chromatiales; Halothiobacillaceae; Thiovirga	135.0	6226.0	7049.0	2526.0	1491.0	2877.0	17.0	58.0	20.0	6414.0	17088.0	162.0	58.0	137.0	1190.0	18.0	25.0	370.0	54.0	37.0	26.0	57.0	1306.0	2302.0	4.0	82.0	194.0	322.0	576.0	367.0	42.0	24.0	36.0	57.0	128.0	71.0	206.0	40.0	0.0	31.0	24.0	421.0
OTU340576934	Bacteria; Proteobacteria; Betaproteobacteria; Hydrogenophilales; Hydrogenophilaceae; Thiobacillus; uncultured bacterium	207.0	59.0	425.0	482.0	296.0	1148.0	4.0	25.0	1.0	198.0	345.0	24.0	5.0	24.0	9.0	0.0	3.0	12.0	1.0	1.0	1.0	118.0	343.0	317.0	2.0	42.0	13.0	36.0	137.0	147.0	76.0	2.0	15.0	0.0	132.0	20.0	0.0	0.0	0.0	0.0	1.0	3.0
OTU358207694	Bacteria; Proteobacteria; Deltaproteobacteria; Desulfobacterales; Desulfobulbaceae; Desulfocapsa; Ambiguous_taxa	266.0	38.0	41.0	957.0	923.0	798.0	902.0	1597.0	1118.0	239.0	320.0	76.0	65.0	235.0	18.0	39.0	251.0	18.0	1210.0	160.0	233.0	27.0	65.0	114.0	22.0	88.0	131.0	156.0	83.0	202.0	282.0	337.0	810.0	1.0	85.0	136.0	610.0	82.0	190.0	1104.0	854.0	978.0
OTU952881166	Bacteria; Spirochaetae; Spirochaetes; Spirochaetales; Leptospiraceae; uncultured	324.0	62.0	56.0	211.0	54.0	88.0	48.0	100.0	150.0	540.0	1052.0	819.0	71.0	52.0	29.0	0.0	8.0	3.0	213.0	27.0	22.0	299.0	320.0	197.0	2.0	19.0	13.0	400.0	49.0	168.0	177.0	200.0	493.0	767.0	180.0	1001.0	535.0	146.0	207.0	181.0	243.0	68.0
OTU407434235	Bacteria; Proteobacteria; Gammaproteobacteria; Pseudomonadales; Pseudomonadaceae; Pseudomonas; uncultured bacterium	1400.0	2626.0	13.0	3062.0	442.0	1335.0	0.0	51.0	0.0	2101.0	2.0	625.0	1.0	33.0	0.0	1.0	1.0	4.0	4.0	0.0	45.0	349.0	2504.0	2750.0	5.0	32.0	2.0	524.0	170.0	0.0	936.0	23.0	9.0	0.0	29.0	0.0	1.0	2.0	0.0	1.0	25.0	8.0
OTU100821858	Bacteria; Proteobacteria; Deltaproteobacteria; Desulfobacterales; Desulfobulbaceae; [Desulfobacterium] catecholicum group; uncultured bacterium	77.0	26.0	39.0	50.0	15.0	24.0	28.0	93.0	102.0	20.0	131.0	126.0	31.0	45.0	21.0	20.0	50.0	39.0	3.0	18.0	6.0	254.0	147.0	251.0	10.0	28.0	34.0	485.0	154.0	438.0	101.0	60.0	76.0	27.0	116.0	164.0	189.0	117.0	53.0	5.0	10.0	11.0
OTU352412552	Bacteria; Proteobacteria; Gammaproteobacteria; Chromatiales; Chromatiaceae; Rheinheimera; Ambiguous_taxa	1.0	67.0	107.0	149.0	86.0	275.0	15.0	0.0	1.0	86.0	436.0	0.0	1.0	0.0	0.0	0.0	1.0	0.0	0.0	7.0	0.0	186.0	2118.0	829.0	0.0	7.0	4.0	1845.0	1815.0	1.0	0.0	0.0	0.0	0.0	0.0	0.0	0.0	1.0	0.0	0.0	3.0	10.0
OTU633417623	Bacteria; Proteobacteria; Deltaproteobacteria; Desulfobacterales; Desulfobacteraceae	5.0	9.0	14.0	2.0	7.0	5.0	134.0	129.0	405.0	47.0	13.0	50.0	63.0	96.0	86.0	8.0	22.0	7.0	445.0	157.0	370.0	18.0	23.0	66.0	0.0	5.0	1.0	64.0	179.0	170.0	76.0	12.0	0.0	0.0	0.0	13.0	0.0	0.0	0.0	440.0	943.0	147.0
OTU270160204	Bacteria; Cyanobacteria; Melainabacteria; Gastranaerophilales	0.0	0.0	1.0	0.0	0.0	0.0	21.0	42.0	50.0	50.0	43.0	8.0	58.0	20.0	34.0	0.0	1.0	2.0	100.0	202.0	101.0	0.0	8.0	8.0	0.0	2.0	2.0	0.0	35.0	12.0	50.0	0.0	0.0	0.0	0.0	10.0	0.0	0.0	0.0	190.0	578.0	97.0
OTU116868891	Bacteria; Proteobacteria; Gammaproteobacteria; Thiotrichales; Piscirickettsiaceae; Thiomicrospira; Ambiguous_taxa	21.0	508.0	105.0	2404.0	232.0	2.0	0.0	13.0	2.0	3319.0	1985.0	3819.0	0.0	1.0	31.0	0.0	3.0	7.0	0.0	0.0	27.0	3966.0	285.0	75.0	17.0	11.0	45.0	3312.0	2315.0	3323.0	30.0	9.0	5.0	0.0	528.0	0.0	0.0	0.0	4.0	0.0	0.0	1.0
OTU369743647	Bacteria; Proteobacteria; Epsilonproteobacteria; Campylobacterales; Helicobacteraceae; uncultured	10.0	7.0	4.0	1.0	0.0	9.0	0.0	3.0	2.0	15.0	47.0	10.0	1.0	1.0	1.0	0.0	0.0	0.0	10.0	4.0	5.0	4.0	52.0	17.0	0.0	0.0	0.0	0.0	0.0	34.0	21.0	5.0	10.0	0.0	0.0	146.0	286.0	63.0	27.0	0.0	0.0	2.0
OTU437879511	Unassigned	3.0	2.0	13.0	0.0	1.0	0.0	1.0	0.0	0.0	68.0	1324.0	52.0	44.0	0.0	1.0	0.0	0.0	0.0	1.0	6.0	0.0	2.0	219.0	0.0	0.0	0.0	0.0	0.0	4.0	0.0	217.0	7798.0	9439.0	17.0	0.0	4.0	0.0	0.0	0.0	135.0	22.0	0.0
OTU892605086	Bacteria; Proteobacteria; Alphaproteobacteria; Rhizobiales; Rhizobiaceae; Rhizobium	5.0	13.0	64.0	70.0	33.0	39.0	6.0	3.0	2.0	28.0	3.0	78.0	0.0	0.0	0.0	0.0	0.0	1.0	0.0	0.0	2.0	31.0	15.0	18.0	1.0	5.0	0.0	11.0	37.0	4.0	4.0	0.0	0.0	0.0	11.0	0.0	0.0	0.0	0.0	0.0	0.0	0.0
OTU518945113	Bacteria; Proteobacteria; Gammaproteobacteria; Chromatiales; Chromatiaceae; Rheinheimera; Ambiguous_taxa	178.0	0.0	0.0	70.0	11.0	0.0	6.0	24.0	0.0	218.0	1.0	308.0	1.0	5.0	0.0	0.0	0.0	79.0	0.0	1.0	81.0	69.0	65.0	691.0	0.0	2.0	0.0	45.0	0.0	25.0	0.0	2.0	1.0	0.0	0.0	0.0	0.0	0.0	0.0	1.0	0.0	18.0
OTU873023060	Bacteria; Nitrospirae; Nitrospira; Nitrospirales; Nitrospiraceae; uncultured; uncultured bacterium	14.0	7.0	12.0	16.0	2.0	1.0	0.0	3.0	8.0	154.0	24.0	5.0	16.0	9.0	6.0	3.0	1.0	0.0	40.0	1.0	3.0	32.0	69.0	20.0	11.0	7.0	4.0	183.0	114.0	127.0	226.0	1.0	0.0	102.0	5.0	6.0	162.0	0.0	161.0	1.0	7.0	2.0
OTU494150110	Bacteria; Proteobacteria; Deltaproteobacteria; Desulfobacterales; Desulfobacteraceae	1.0	1.0	0.0	24.0	4.0	2.0	8.0	44.0	33.0	2.0	3.0	4.0	0.0	0.0	0.0	0.0	0.0	0.0	28.0	1.0	1.0	3.0	8.0	8.0	0.0	0.0	0.0	8.0	54.0	20.0	152.0	43.0	16.0	0.0	0.0	8.0	0.0	0.0	0.0	1.0	20.0	0.0
OTU393694999	Bacteria; Firmicutes; Clostridia; Clostridiales; MAT-CR-H4-C10; uncultured bacterium; uncultured bacterium	2.0	0.0	0.0	2.0	0.0	3.0	0.0	0.0	1.0	3.0	10.0	0.0	0.0	0.0	0.0	0.0	0.0	1.0	0.0	6.0	0.0	0.0	0.0	2.0	0.0	1.0	0.0	119.0	19.0	46.0	0.0	0.0	6.0	0.0	0.0	17.0	0.0	0.0	0.0	2.0	0.0	0.0
OTU581554005	Bacteria; Proteobacteria; Betaproteobacteria; Rhodocyclales; Rhodocyclaceae; Thauera; Thauera phenylacetica	0.0	0.0	0.0	0.0	0.0	0.0	0.0	0.0	0.0	1.0	0.0	0.0	0.0	0.0	0.0	0.0	1890.0	1.0	0.0	0.0	0.0	0.0	0.0	0.0	20.0	17.0	27.0	0.0	0.0	0.0	0.0	0.0	0.0	0.0	1.0	0.0	0.0	0.0	0.0	0.0	0.0	0.0
OTU790556167	Unassigned	0.0	0.0	0.0	0.0	0.0	0.0	0.0	0.0	0.0	0.0	0.0	0.0	0.0	0.0	0.0	0.0	696.0	0.0	1.0	0.0	0.0	0.0	0.0	20.0	0.0	269.0	0.0	0.0	0.0	0.0	0.0	0.0	0.0	0.0	0.0	0.0	0.0	0.0	0.0	0.0	0.0	0.0
OTU180239880	Bacteria; Proteobacteria; Deltaproteobacteria; Desulfobacterales; Desulfobulbaceae; MSBL7	0.0	1.0	17.0	1.0	0.0	3.0	0.0	0.0	0.0	0.0	0.0	0.0	78.0	23.0	14.0	342.0	349.0	481.0	29.0	31.0	24.0	0.0	0.0	1.0	24.0	126.0	0.0	0.0	1.0	2.0	0.0	0.0	0.0	0.0	0.0	1.0	0.0	0.0	7.0	0.0	3.0	8.0
OTU562355290	Bacteria; Proteobacteria; Deltaproteobacteria; Desulfuromonadales; Geobacteraceae; Geobacter	0.0	0.0	0.0	0.0	0.0	0.0	0.0	0.0	0.0	0.0	0.0	0.0	0.0	0.0	0.0	45.0	316.0	166.0	11.0	31.0	15.0	0.0	0.0	0.0	0.0	3.0	1.0	0.0	0.0	0.0	0.0	0.0	0.0	0.0	0.0	0.0	0.0	0.0	0.0	0.0	0.0	36.0
OTU79402815	Bacteria; Proteobacteria; Alphaproteobacteria; Magnetococcales; Magnetococcaceae; Magnetococcus; uncultured Magnetococcus sp.	0.0	0.0	0.0	0.0	0.0	28.0	0.0	0.0	0.0	0.0	0.0	0.0	0.0	0.0	0.0	54.0	258.0	197.0	31.0	0.0	0.0	0.0	0.0	13.0	0.0	33.0	21.0	0.0	0.0	0.0	4.0	14.0	0.0	0.0	1.0	0.0	0.0	0.0	0.0	0.0	0.0	7.0
OTU212837055	Bacteria; Bacteroidetes; Bacteroidia; Bacteroidia Incertae Sedis; Draconibacteriaceae; uncultured	611.0	314.0	480.0	73.0	51.0	34.0	284.0	363.0	216.0	813.0	696.0	307.0	73.0	94.0	111.0	275.0	323.0	202.0	384.0	255.0	206.0	386.0	1332.0	432.0	383.0	907.0	603.0	1638.0	1411.0	3536.0	521.0	456.0	283.0	0.0	465.0	314.0	1048.0	867.0	1454.0	263.0	263.0	238.0
OTU925769378	Bacteria; Proteobacteria; Betaproteobacteria; Rhodocyclales; Rhodocyclaceae; uncultured; uncultured bacterium	0.0	0.0	3.0	1.0	2.0	1.0	4.0	2.0	1.0	2.0	2.0	2.0	92.0	14.0	10.0	2.0	191.0	9.0	15.0	15.0	18.0	0.0	2.0	2.0	37.0	76.0	7356.0	0.0	21.0	20.0	12.0	5.0	11.0	0.0	1.0	0.0	0.0	62.0	0.0	2.0	25.0	5.0
OTU873912296	Bacteria; Spirochaetae; Spirochaetes; Spirochaetales; Spirochaetaceae; Spirochaeta 2; uncultured bacterium	0.0	0.0	0.0	0.0	11.0	1.0	0.0	0.0	0.0	0.0	2.0	4.0	2.0	3.0	6.0	70.0	169.0	77.0	22.0	24.0	32.0	0.0	0.0	4.0	45.0	2.0	38.0	9.0	0.0	15.0	3.0	0.0	0.0	0.0	0.0	10.0	0.0	0.0	0.0	8.0	15.0	6.0
OTU292989651	Bacteria; Omnitrophica; Omnitrophica Incertae Sedis; Unknown Order; Unknown Family; Candidatus Omnitrophus	27.0	12.0	4.0	6.0	4.0	3.0	1.0	0.0	4.0	37.0	13.0	8.0	11.0	10.0	4.0	37.0	224.0	49.0	1.0	3.0	7.0	1.0	13.0	14.0	3.0	7.0	1.0	67.0	25.0	26.0	41.0	0.0	24.0	0.0	32.0	25.0	74.0	0.0	0.0	11.0	6.0	10.0
OTU126302225	Unassigned	0.0	0.0	0.0	0.0	0.0	0.0	0.0	15.0	0.0	0.0	1.0	0.0	0.0	0.0	0.0	62.0	203.0	37.0	0.0	0.0	0.0	0.0	0.0	6.0	33.0	151.0	9.0	0.0	0.0	0.0	0.0	0.0	0.0	0.0	0.0	0.0	0.0	0.0	0.0	0.0	1.0	0.0
OTU726300328	Bacteria; Nitrospinae; MD2898-B26; uncultured bacterium; uncultured bacterium; uncultured bacterium; uncultured bacterium	22.0	34.0	2.0	1.0	11.0	2.0	144.0	87.0	239.0	77.0	84.0	8.0	139.0	73.0	85.0	2.0	122.0	7.0	1086.0	321.0	284.0	18.0	7.0	45.0	0.0	0.0	3.0	26.0	75.0	28.0	34.0	1.0	21.0	1.0	0.0	10.0	0.0	80.0	0.0	258.0	703.0	82.0
OTU4392290	Bacteria; Proteobacteria; Deltaproteobacteria; Desulfobacterales; Desulfobulbaceae	0.0	0.0	1.0	0.0	0.0	0.0	0.0	0.0	0.0	0.0	0.0	0.0	516.0	91.0	40.0	4.0	39.0	34.0	13.0	41.0	19.0	0.0	0.0	0.0	0.0	33.0	1.0	0.0	0.0	0.0	0.0	0.0	0.0	0.0	0.0	0.0	0.0	0.0	0.0	0.0	0.0	0.0
OTU315492123	Bacteria; Proteobacteria; Deltaproteobacteria; Desulfobacterales; Desulfobulbaceae; Desulfocapsa	185.0	42.0	36.0	466.0	306.0	916.0	344.0	473.0	564.0	115.0	97.0	120.0	40.0	118.0	23.0	65.0	184.0	239.0	482.0	246.0	109.0	72.0	146.0	124.0	4.0	35.0	104.0	329.0	253.0	483.0	146.0	290.0	568.0	18.0	39.0	139.0	288.0	626.0	526.0	268.0	350.0	334.0
OTU946167893	Bacteria; TM6 (Dependentiae); uncultured bacterium; uncultured bacterium; uncultured bacterium; uncultured bacterium; uncultured bacterium	0.0	0.0	0.0	0.0	0.0	1.0	4.0	37.0	17.0	0.0	0.0	0.0	27.0	1.0	0.0	0.0	57.0	53.0	1.0	2.0	14.0	0.0	1.0	0.0	2.0	8.0	17.0	0.0	0.0	0.0	2.0	3.0	0.0	0.0	0.0	0.0	125.0	0.0	0.0	0.0	0.0	41.0
OTU42876635	Bacteria; Proteobacteria; Deltaproteobacteria; Syntrophobacterales; Syntrophaceae; Syntrophus; uncultured bacterium	42.0	92.0	226.0	46.0	42.0	24.0	122.0	184.0	192.0	43.0	86.0	68.0	170.0	144.0	65.0	83.0	40.0	83.0	143.0	213.0	91.0	89.0	89.0	56.0	69.0	193.0	73.0	41.0	320.0	114.0	215.0	105.0	136.0	22.0	189.0	55.0	1521.0	1689.0	1467.0	260.0	277.0	148.0
OTU828831889	Bacteria; Proteobacteria; Deltaproteobacteria; Myxococcales; VHS-B3-70; uncultured bacterium; uncultured bacterium	1.0	0.0	0.0	2.0	0.0	0.0	0.0	0.0	0.0	7.0	9.0	0.0	0.0	29.0	0.0	7.0	207.0	14.0	1.0	0.0	1.0	0.0	5.0	5.0	3.0	17.0	3.0	0.0	0.0	0.0	1.0	0.0	1.0	0.0	0.0	0.0	57.0	0.0	0.0	0.0	4.0	1.0
OTU84093439	Bacteria; Proteobacteria; Deltaproteobacteria; Desulfobacterales; Desulfobacteraceae	21.0	138.0	54.0	177.0	163.0	304.0	106.0	31.0	63.0	139.0	138.0	102.0	159.0	107.0	77.0	68.0	58.0	44.0	295.0	346.0	254.0	67.0	90.0	154.0	13.0	3.0	28.0	193.0	273.0	336.0	1222.0	312.0	267.0	0.0	408.0	229.0	0.0	48.0	101.0	33.0	63.0	33.0
OTU529371943	Bacteria; Cyanobacteria; Melainabacteria; Gastranaerophilales; uncultured bacterium; uncultured bacterium; uncultured bacterium	0.0	2.0	3.0	1.0	1.0	2.0	23.0	217.0	83.0	6.0	0.0	0.0	41.0	18.0	25.0	40.0	125.0	29.0	77.0	75.0	17.0	0.0	11.0	6.0	0.0	0.0	0.0	0.0	10.0	0.0	12.0	0.0	0.0	0.0	37.0	3.0	0.0	0.0	96.0	92.0	211.0	142.0
OTU183349508	Unassigned	0.0	0.0	0.0	0.0	0.0	0.0	0.0	0.0	0.0	0.0	0.0	0.0	0.0	1.0	0.0	1.0	319.0	75.0	1.0	0.0	0.0	0.0	0.0	7.0	0.0	763.0	0.0	0.0	0.0	0.0	0.0	0.0	0.0	0.0	0.0	0.0	0.0	0.0	0.0	0.0	0.0	1.0
OTU620653373	Bacteria; Actinobacteria; Thermoleophilia; Gaiellales; uncultured; uncultured bacterium; uncultured bacterium	0.0	0.0	0.0	0.0	0.0	0.0	0.0	0.0	0.0	0.0	0.0	0.0	0.0	0.0	0.0	6.0	95.0	0.0	0.0	0.0	0.0	0.0	0.0	0.0	0.0	109.0	0.0	0.0	0.0	0.0	0.0	0.0	0.0	0.0	0.0	0.0	0.0	0.0	0.0	0.0	0.0	0.0
OTU351939156	Archaea; Euryarchaeota; Thermoplasmata; Thermoplasmatales; ASC21; Ambiguous_taxa; Ambiguous_taxa	0.0	2.0	3.0	2.0	1.0	0.0	30.0	10.0	0.0	15.0	3.0	25.0	6.0	22.0	8.0	15.0	54.0	12.0	7.0	120.0	111.0	0.0	5.0	1.0	0.0	0.0	1.0	1.0	57.0	12.0	2.0	3.0	0.0	0.0	0.0	0.0	43.0	0.0	0.0	10.0	7.0	9.0
OTU491049387	Bacteria; WS2; uncultured bacterium; uncultured bacterium; uncultured bacterium; uncultured bacterium; uncultured bacterium	0.0	0.0	0.0	0.0	0.0	2.0	0.0	0.0	4.0	0.0	0.0	0.0	3.0	8.0	4.0	14.0	59.0	42.0	67.0	6.0	1.0	5.0	0.0	0.0	13.0	29.0	4.0	0.0	0.0	0.0	0.0	0.0	0.0	0.0	0.0	0.0	0.0	0.0	0.0	27.0	2.0	11.0
OTU371649932	Bacteria; Nitrospirae; Nitrospira; Nitrospirales; Nitrospiraceae; uncultured; uncultured bacterium	1.0	0.0	0.0	0.0	0.0	0.0	0.0	0.0	0.0	9.0	0.0	0.0	1.0	2.0	0.0	0.0	96.0	0.0	0.0	0.0	0.0	2.0	0.0	2.0	0.0	0.0	0.0	2.0	1.0	1.0	3.0	0.0	0.0	0.0	0.0	0.0	29.0	0.0	504.0	0.0	1.0	0.0
OTU36169947	Bacteria; Proteobacteria; Betaproteobacteria; Rhodocyclales; Rhodocyclaceae	0.0	0.0	0.0	0.0	0.0	0.0	0.0	0.0	0.0	0.0	0.0	0.0	0.0	0.0	0.0	1.0	68.0	0.0	0.0	0.0	0.0	0.0	0.0	0.0	27.0	263.0	13.0	0.0	0.0	0.0	0.0	0.0	0.0	0.0	0.0	0.0	0.0	0.0	0.0	0.0	0.0	0.0
OTU570101875	Bacteria; Latescibacteria; uncultured bacterium; uncultured bacterium; uncultured bacterium; uncultured bacterium; uncultured bacterium	0.0	1.0	0.0	0.0	1.0	0.0	15.0	5.0	0.0	2.0	0.0	0.0	28.0	7.0	10.0	82.0	41.0	66.0	15.0	12.0	16.0	0.0	4.0	2.0	14.0	9.0	3.0	3.0	0.0	0.0	0.0	0.0	0.0	0.0	0.0	0.0	0.0	0.0	0.0	5.0	38.0	4.0
OTU677667785	Bacteria; Proteobacteria; Deltaproteobacteria; Desulfarculales; Desulfarculaceae; uncultured; uncultured bacterium	0.0	5.0	1.0	0.0	2.0	0.0	0.0	0.0	0.0	0.0	0.0	0.0	6.0	15.0	0.0	31.0	70.0	25.0	6.0	1.0	0.0	17.0	0.0	23.0	15.0	121.0	1.0	0.0	0.0	10.0	6.0	0.0	0.0	0.0	0.0	0.0	0.0	0.0	0.0	0.0	0.0	5.0
OTU505394208	Bacteria; Proteobacteria; Deltaproteobacteria; Desulfobacterales; Desulfobacteraceae; uncultured; uncultured bacterium	133.0	113.0	190.0	58.0	14.0	47.0	99.0	75.0	183.0	60.0	121.0	105.0	139.0	110.0	48.0	60.0	146.0	68.0	55.0	146.0	57.0	505.0	293.0	258.0	42.0	139.0	58.0	289.0	141.0	177.0	437.0	201.0	107.0	0.0	181.0	79.0	83.0	28.0	78.0	113.0	142.0	106.0
OTU627414406	Bacteria; Acidobacteria; Holophagae; Holophagales; Holophagaceae; uncultured; uncultured bacterium	0.0	1.0	10.0	0.0	1.0	0.0	4.0	1.0	3.0	0.0	0.0	0.0	1.0	0.0	0.0	11.0	34.0	291.0	95.0	337.0	99.0	0.0	0.0	0.0	36.0	31.0	178.0	0.0	0.0	0.0	0.0	0.0	0.0	0.0	0.0	1.0	0.0	1.0	0.0	8.0	150.0	49.0
OTU593246837	Bacteria; Proteobacteria; Deltaproteobacteria; Desulfobacterales; Desulfobulbaceae; MSBL7	0.0	0.0	1.0	5.0	4.0	5.0	157.0	312.0	218.0	0.0	5.0	6.0	103.0	186.0	142.0	147.0	345.0	115.0	130.0	227.0	491.0	0.0	0.0	0.0	8.0	4.0	9.0	0.0	0.0	0.0	207.0	8.0	1.0	0.0	1.0	1.0	0.0	1.0	0.0	41.0	149.0	142.0
OTU473342481	Bacteria; Aminicenantes; uncultured bacterium; uncultured bacterium; uncultured bacterium; uncultured bacterium; uncultured bacterium	53.0	12.0	24.0	63.0	46.0	49.0	26.0	28.0	48.0	199.0	263.0	101.0	3.0	12.0	18.0	94.0	76.0	137.0	4.0	32.0	8.0	5.0	26.0	13.0	4.0	8.0	15.0	446.0	264.0	314.0	0.0	5.0	16.0	0.0	77.0	14.0	0.0	0.0	0.0	26.0	25.0	6.0
OTU452421471	Bacteria; Proteobacteria; Betaproteobacteria; Rhodocyclales; Rhodocyclaceae; uncultured	2.0	1.0	0.0	1.0	2.0	0.0	13.0	4.0	4.0	10.0	3.0	0.0	36.0	1.0	7.0	15.0	75.0	22.0	42.0	16.0	19.0	1.0	2.0	4.0	20.0	184.0	1929.0	15.0	29.0	14.0	23.0	5.0	6.0	0.0	2.0	4.0	43.0	32.0	0.0	3.0	3.0	1.0
OTU104623122	Bacteria; Chloroflexi; SJA-15; uncultured bacterium; uncultured bacterium; uncultured bacterium; uncultured bacterium	14.0	15.0	39.0	13.0	17.0	17.0	6.0	14.0	18.0	18.0	17.0	0.0	33.0	59.0	12.0	159.0	109.0	149.0	7.0	9.0	11.0	49.0	11.0	56.0	260.0	201.0	208.0	120.0	131.0	100.0	87.0	7.0	1.0	0.0	0.0	6.0	180.0	0.0	108.0	6.0	22.0	57.0
OTU496883498	Bacteria; Proteobacteria; Deltaproteobacteria; Syntrophobacterales; Syntrophaceae; Desulfomonile; uncultured bacterium	1.0	3.0	6.0	1.0	0.0	3.0	3.0	0.0	0.0	1.0	11.0	2.0	6.0	17.0	3.0	13.0	24.0	48.0	1.0	4.0	4.0	14.0	6.0	9.0	163.0	46.0	62.0	8.0	14.0	43.0	28.0	2.0	0.0	0.0	0.0	66.0	31.0	0.0	0.0	2.0	5.0	5.0
OTU160609639	Bacteria; Proteobacteria; Deltaproteobacteria; Desulfobacterales; Desulfobulbaceae; Desulfurivibrio; uncultured bacterium	0.0	0.0	4.0	24.0	25.0	24.0	117.0	324.0	164.0	0.0	0.0	0.0	90.0	146.0	92.0	59.0	167.0	28.0	139.0	177.0	259.0	1.0	0.0	0.0	23.0	13.0	213.0	0.0	0.0	0.0	77.0	15.0	3.0	0.0	0.0	0.0	0.0	0.0	0.0	46.0	90.0	198.0
OTU870259965	Bacteria; Proteobacteria; Deltaproteobacteria; Desulfobacterales; Desulfobulbaceae; Desulfocapsa	2.0	1.0	0.0	16.0	4.0	8.0	66.0	107.0	61.0	0.0	0.0	0.0	20.0	57.0	40.0	30.0	185.0	13.0	63.0	53.0	133.0	0.0	0.0	0.0	0.0	1.0	1.0	0.0	0.0	0.0	13.0	1.0	0.0	0.0	0.0	2.0	0.0	0.0	0.0	64.0	94.0	111.0
OTU78753841	Bacteria; Chloroflexi; Anaerolineae; Anaerolineales; Anaerolineaceae; uncultured; uncultured bacterium	0.0	0.0	3.0	0.0	0.0	2.0	0.0	0.0	0.0	0.0	0.0	0.0	0.0	3.0	0.0	16.0	66.0	37.0	0.0	0.0	0.0	0.0	0.0	10.0	3.0	15.0	13.0	0.0	0.0	0.0	0.0	0.0	0.0	0.0	0.0	0.0	0.0	0.0	22.0	0.0	0.0	9.0
OTU358201444	Bacteria; Proteobacteria; Deltaproteobacteria; Desulfobacterales; Desulfobulbaceae; [Desulfobacterium] catecholicum group; uncultured bacterium	4.0	3.0	10.0	0.0	0.0	0.0	0.0	3.0	11.0	0.0	5.0	5.0	1.0	15.0	12.0	41.0	154.0	22.0	3.0	10.0	10.0	0.0	5.0	0.0	7.0	10.0	11.0	8.0	0.0	18.0	108.0	7.0	0.0	0.0	13.0	34.0	1.0	88.0	0.0	4.0	0.0	0.0
OTU657474169	Bacteria; Chloroflexi; Ardenticatenia; uncultured; uncultured organism; uncultured organism; uncultured organism	12.0	6.0	2.0	0.0	0.0	0.0	17.0	20.0	31.0	14.0	3.0	0.0	17.0	22.0	12.0	51.0	93.0	87.0	67.0	31.0	80.0	2.0	8.0	25.0	17.0	19.0	40.0	7.0	8.0	0.0	6.0	3.0	0.0	14.0	44.0	41.0	25.0	11.0	0.0	11.0	22.0	8.0
OTU299290276	Bacteria; Proteobacteria; Alphaproteobacteria; Rickettsiales; Rickettsiales Incertae Sedis; Candidatus Finniella; uncultured bacterium	68.0	20.0	5.0	3.0	10.0	3.0	24.0	88.0	96.0	27.0	34.0	4.0	31.0	35.0	32.0	6.0	34.0	99.0	122.0	97.0	68.0	13.0	11.0	1.0	32.0	28.0	12.0	7.0	0.0	0.0	30.0	27.0	11.0	0.0	53.0	48.0	0.0	0.0	72.0	39.0	47.0	50.0
OTU887151695	Bacteria; WS2; uncultured bacterium; uncultured bacterium; uncultured bacterium; uncultured bacterium; uncultured bacterium	0.0	0.0	0.0	0.0	0.0	0.0	4.0	4.0	0.0	1.0	0.0	0.0	2.0	5.0	2.0	12.0	70.0	25.0	10.0	8.0	5.0	6.0	6.0	3.0	13.0	17.0	56.0	0.0	30.0	8.0	0.0	0.0	0.0	0.0	0.0	0.0	0.0	0.0	0.0	0.0	2.0	5.0
OTU189925490	Bacteria; Latescibacteria; uncultured bacterium; uncultured bacterium; uncultured bacterium; uncultured bacterium; uncultured bacterium	0.0	0.0	0.0	0.0	0.0	0.0	4.0	1.0	0.0	0.0	0.0	0.0	16.0	2.0	7.0	129.0	119.0	48.0	7.0	10.0	13.0	1.0	5.0	1.0	37.0	7.0	5.0	0.0	0.0	0.0	0.0	0.0	0.0	0.0	0.0	0.0	0.0	0.0	0.0	2.0	3.0	1.0
OTU698872297	Bacteria; Fibrobacteres; Chitinivibrionia; uncultured; uncultured bacterium; uncultured bacterium; uncultured bacterium	0.0	0.0	0.0	0.0	1.0	0.0	0.0	0.0	0.0	1.0	0.0	0.0	6.0	0.0	1.0	3.0	39.0	7.0	0.0	0.0	0.0	0.0	2.0	5.0	1.0	11.0	6.0	132.0	25.0	54.0	0.0	0.0	0.0	0.0	0.0	90.0	0.0	0.0	0.0	3.0	1.0	1.0
OTU368140952	Bacteria; Aminicenantes; uncultured bacterium; uncultured bacterium; uncultured bacterium; uncultured bacterium; uncultured bacterium	0.0	0.0	0.0	9.0	1.0	1.0	8.0	3.0	8.0	0.0	7.0	3.0	9.0	1.0	0.0	53.0	101.0	39.0	0.0	4.0	0.0	0.0	0.0	0.0	1.0	0.0	1.0	46.0	11.0	32.0	0.0	0.0	10.0	0.0	0.0	0.0	0.0	0.0	0.0	2.0	4.0	2.0
OTU331598385	Bacteria; Planctomycetes; Planctomycetacia; Planctomycetales; Planctomycetaceae; Pir4 lineage; uncultured bacterium	2.0	0.0	2.0	0.0	0.0	0.0	5.0	4.0	2.0	1.0	0.0	0.0	3.0	4.0	2.0	22.0	35.0	27.0	1.0	1.0	3.0	0.0	6.0	3.0	6.0	19.0	36.0	3.0	2.0	2.0	5.0	0.0	0.0	0.0	0.0	0.0	0.0	21.0	0.0	1.0	0.0	1.0
OTU391834252	Bacteria; Spirochaetae; Spirochaetes; Spirochaetales; Spirochaetaceae; uncultured; uncultured bacterium	0.0	0.0	9.0	0.0	2.0	0.0	1.0	0.0	2.0	1.0	0.0	0.0	0.0	2.0	0.0	63.0	112.0	41.0	0.0	2.0	1.0	0.0	0.0	0.0	27.0	43.0	12.0	39.0	14.0	0.0	0.0	0.0	0.0	0.0	0.0	0.0	0.0	0.0	0.0	0.0	0.0	0.0
OTU297305372	Bacteria; Actinobacteria; Coriobacteriia; Coriobacteriales; Coriobacteriaceae; uncultured; uncultured bacterium	3.0	0.0	13.0	57.0	30.0	14.0	95.0	72.0	19.0	12.0	18.0	12.0	171.0	83.0	70.0	80.0	121.0	107.0	69.0	190.0	106.0	3.0	12.0	10.0	1.0	3.0	2.0	164.0	0.0	210.0	43.0	1.0	0.0	0.0	21.0	4.0	712.0	930.0	1544.0	114.0	95.0	77.0
OTU95066653	Bacteria; Parcubacteria; Candidatus Nomurabacteria; uncultured bacterium; uncultured bacterium; uncultured bacterium; uncultured bacterium	0.0	0.0	1.0	0.0	21.0	1.0	7.0	14.0	118.0	0.0	0.0	0.0	0.0	11.0	0.0	0.0	39.0	13.0	0.0	39.0	10.0	0.0	0.0	0.0	0.0	0.0	0.0	75.0	20.0	17.0	0.0	0.0	0.0	0.0	0.0	0.0	0.0	0.0	0.0	0.0	0.0	0.0
OTU972311988	Bacteria; Proteobacteria; Gammaproteobacteria; Chromatiales; Chromatiaceae; Rheinheimera	0.0	0.0	1.0	26.0	33.0	3.0	0.0	0.0	0.0	441.0	331.0	0.0	0.0	4.0	6.0	1.0	3.0	0.0	0.0	0.0	0.0	7.0	374.0	73.0	1.0	370.0	0.0	409.0	1589.0	7972.0	0.0	1.0	0.0	1.0	0.0	0.0	0.0	188.0	1.0	0.0	0.0	8.0
OTU289354446	Bacteria; Proteobacteria; Deltaproteobacteria; Syntrophobacterales; Syntrophobacteraceae; uncultured; uncultured bacterium	31.0	16.0	7.0	4.0	3.0	10.0	4.0	4.0	2.0	6.0	18.0	3.0	30.0	9.0	4.0	8.0	25.0	4.0	30.0	4.0	4.0	25.0	24.0	76.0	23.0	26.0	78.0	78.0	25.0	176.0	37.0	16.0	17.0	0.0	0.0	39.0	85.0	78.0	273.0	15.0	7.0	15.0
OTU95784591	Bacteria; Proteobacteria; Gammaproteobacteria; Chromatiales; Halothiobacillaceae; uncultured; uncultured bacterium	233.0	374.0	1685.0	438.0	359.0	512.0	1.0	26.0	4.0	881.0	532.0	754.0	1.0	5.0	62.0	2.0	2.0	5.0	6.0	10.0	2.0	641.0	148.0	324.0	0.0	13.0	15.0	17.0	132.0	756.0	147.0	54.0	60.0	0.0	252.0	8.0	0.0	0.0	0.0	0.0	0.0	10.0
OTU164114121	Bacteria; Parcubacteria; Candidatus Falkowbacteria	0.0	7.0	1.0	3.0	21.0	5.0	265.0	200.0	598.0	18.0	24.0	1.0	239.0	66.0	173.0	0.0	25.0	0.0	996.0	16.0	1298.0	4.0	4.0	51.0	5.0	0.0	0.0	0.0	325.0	0.0	39.0	2.0	1.0	0.0	0.0	36.0	0.0	0.0	53.0	832.0	1505.0	39.0
OTU471520611	Bacteria; Chloroflexi; SBR2076; uncultured bacterium; uncultured bacterium; uncultured bacterium; uncultured bacterium	0.0	0.0	0.0	1.0	0.0	0.0	3.0	0.0	0.0	35.0	0.0	5.0	1.0	0.0	1.0	25.0	19.0	130.0	18.0	4.0	3.0	1.0	1.0	0.0	51.0	0.0	1.0	29.0	29.0	73.0	26.0	6.0	0.0	0.0	0.0	0.0	16.0	0.0	0.0	0.0	2.0	3.0
OTU240822392	Bacteria; Proteobacteria; Deltaproteobacteria; Desulfobacterales; Desulfobulbaceae; uncultured; Ambiguous_taxa	14.0	3.0	7.0	17.0	6.0	4.0	1.0	6.0	9.0	54.0	32.0	14.0	39.0	21.0	9.0	1.0	21.0	3.0	16.0	4.0	4.0	22.0	77.0	72.0	87.0	3.0	140.0	233.0	184.0	338.0	116.0	32.0	18.0	19.0	0.0	0.0	880.0	93.0	1559.0	5.0	20.0	3.0
OTU920474610	Bacteria; Proteobacteria; Deltaproteobacteria; Desulfarculales; Desulfarculaceae; uncultured; uncultured bacterium	9.0	27.0	17.0	5.0	2.0	2.0	39.0	6.0	31.0	11.0	5.0	3.0	39.0	24.0	10.0	99.0	130.0	43.0	14.0	11.0	23.0	1.0	8.0	27.0	20.0	6.0	3.0	9.0	39.0	32.0	25.0	17.0	8.0	0.0	70.0	79.0	0.0	13.0	40.0	19.0	4.0	17.0
OTU193197236	Bacteria; Proteobacteria; Deltaproteobacteria; Desulfobacterales; Desulfobacteraceae	302.0	614.0	615.0	55.0	44.0	29.0	60.0	63.0	40.0	112.0	77.0	24.0	72.0	170.0	61.0	20.0	59.0	33.0	98.0	159.0	72.0	64.0	69.0	127.0	6.0	8.0	16.0	161.0	136.0	280.0	44.0	17.0	58.0	55.0	345.0	255.0	0.0	1.0	0.0	66.0	78.0	73.0
OTU405069614	Bacteria; Proteobacteria; Deltaproteobacteria; Bdellovibrionales; Bacteriovoracaceae; Deferrisoma; uncultured bacterium	3.0	0.0	1.0	2.0	5.0	3.0	363.0	292.0	273.0	5.0	13.0	18.0	263.0	729.0	70.0	56.0	137.0	68.0	774.0	730.0	1229.0	0.0	0.0	0.0	0.0	0.0	0.0	0.0	0.0	0.0	10.0	0.0	0.0	0.0	37.0	4.0	2.0	0.0	134.0	61.0	193.0	102.0
OTU550225687	Bacteria; Bacteroidetes; Bacteroidia; Bacteroidia Incertae Sedis; Draconibacteriaceae; uncultured; uncultured bacterium	28.0	10.0	104.0	3.0	25.0	28.0	88.0	21.0	22.0	8.0	37.0	7.0	6.0	0.0	10.0	8.0	30.0	11.0	19.0	90.0	3.0	6.0	26.0	4.0	3.0	3.0	1.0	139.0	21.0	405.0	13.0	4.0	20.0	0.0	35.0	40.0	0.0	0.0	0.0	1.0	123.0	2.0
OTU173259923	Bacteria; Chlorobi; Chlorobia; Chlorobiales; SJA-28; Ambiguous_taxa; Ambiguous_taxa	0.0	1.0	3.0	1.0	0.0	0.0	3.0	0.0	0.0	4.0	0.0	0.0	3.0	8.0	1.0	18.0	1.0	26.0	0.0	6.0	3.0	10.0	12.0	3.0	174.0	107.0	32.0	13.0	81.0	90.0	10.0	0.0	0.0	0.0	0.0	0.0	71.0	13.0	0.0	2.0	5.0	0.0
OTU236989484	Bacteria; Parcubacteria; Candidatus Moranbacteria	0.0	0.0	0.0	1.0	1.0	4.0	91.0	168.0	146.0	82.0	0.0	0.0	398.0	60.0	101.0	21.0	55.0	37.0	183.0	444.0	91.0	0.0	0.0	0.0	0.0	0.0	0.0	0.0	0.0	0.0	14.0	13.0	0.0	0.0	0.0	5.0	0.0	0.0	0.0	81.0	31.0	40.0
OTU403592960	Bacteria; Proteobacteria; Deltaproteobacteria; Desulfobacterales; Desulfobulbaceae; MSBL7	1.0	0.0	13.0	1.0	3.0	16.0	333.0	203.0	8.0	0.0	0.0	0.0	107.0	38.0	460.0	0.0	4.0	84.0	1.0	6.0	225.0	0.0	0.0	0.0	0.0	0.0	0.0	0.0	0.0	0.0	3.0	0.0	0.0	0.0	0.0	1.0	0.0	0.0	0.0	1.0	4.0	92.0
OTU893410074	Bacteria; Bacteroidetes; Sphingobacteriia; Sphingobacteriales; Lentimicrobiaceae; uncultured bacterium; uncultured bacterium	0.0	0.0	0.0	0.0	0.0	0.0	0.0	0.0	0.0	0.0	0.0	0.0	0.0	0.0	0.0	29.0	93.0	88.0	0.0	0.0	0.0	0.0	0.0	0.0	23.0	30.0	58.0	1.0	24.0	0.0	4.0	0.0	0.0	0.0	0.0	0.0	0.0	0.0	0.0	0.0	0.0	0.0
OTU261595712	Bacteria; Latescibacteria; uncultured bacterium; uncultured bacterium; uncultured bacterium; uncultured bacterium; uncultured bacterium	0.0	0.0	1.0	1.0	2.0	0.0	15.0	20.0	43.0	9.0	4.0	10.0	58.0	28.0	7.0	8.0	10.0	22.0	4.0	26.0	26.0	8.0	3.0	21.0	1.0	4.0	6.0	13.0	33.0	55.0	2.0	16.0	22.0	0.0	0.0	6.0	0.0	0.0	0.0	10.0	17.0	11.0
OTU293078649	Unassigned	0.0	0.0	0.0	1.0	0.0	0.0	0.0	0.0	0.0	0.0	0.0	0.0	1.0	1.0	0.0	41.0	48.0	11.0	0.0	1.0	0.0	0.0	0.0	0.0	8.0	58.0	7.0	12.0	8.0	16.0	0.0	0.0	0.0	0.0	0.0	0.0	0.0	0.0	0.0	0.0	0.0	0.0
OTU131091358	Bacteria; Gracilibacteria	0.0	0.0	0.0	1.0	2.0	1.0	5.0	0.0	0.0	0.0	6.0	4.0	66.0	1.0	0.0	0.0	0.0	0.0	1.0	4.0	5.0	0.0	2.0	0.0	0.0	0.0	0.0	0.0	18.0	20.0	0.0	5.0	0.0	0.0	0.0	0.0	0.0	72.0	0.0	3.0	6.0	1.0
OTU813847519	Bacteria; Chloroflexi; Anaerolineae; Anaerolineales; Anaerolineaceae; Anaerolinea; uncultured soil bacterium	87.0	25.0	14.0	1.0	0.0	7.0	0.0	4.0	14.0	0.0	0.0	0.0	0.0	0.0	0.0	6.0	3.0	8.0	0.0	31.0	2.0	1.0	0.0	10.0	4.0	5.0	1.0	43.0	7.0	10.0	14.0	0.0	0.0	0.0	0.0	0.0	0.0	0.0	0.0	5.0	0.0	4.0
OTU912321529	Bacteria; Latescibacteria; uncultured bacterium; uncultured bacterium; uncultured bacterium; uncultured bacterium; uncultured bacterium	3.0	0.0	0.0	0.0	0.0	0.0	0.0	0.0	1.0	2.0	11.0	0.0	2.0	0.0	1.0	15.0	27.0	24.0	0.0	0.0	1.0	0.0	0.0	0.0	7.0	9.0	10.0	37.0	0.0	15.0	3.0	0.0	0.0	0.0	0.0	0.0	0.0	0.0	0.0	2.0	0.0	0.0
OTU891415461	Bacteria; Proteobacteria; Alphaproteobacteria; Rickettsiales; Rickettsiales Incertae Sedis; uncultured; uncultured bacterium	11.0	1.0	0.0	0.0	0.0	3.0	31.0	34.0	80.0	11.0	17.0	3.0	21.0	5.0	6.0	3.0	25.0	1.0	101.0	4.0	2.0	5.0	1.0	0.0	92.0	2.0	168.0	0.0	0.0	0.0	37.0	26.0	7.0	0.0	0.0	20.0	0.0	0.0	0.0	33.0	31.0	41.0
OTU423080197	Bacteria; Nitrospinae; MD2898-B26; uncultured bacterium; uncultured bacterium; uncultured bacterium; uncultured bacterium	0.0	10.0	0.0	1.0	8.0	0.0	285.0	285.0	890.0	24.0	6.0	0.0	850.0	169.0	228.0	42.0	21.0	69.0	412.0	568.0	161.0	2.0	2.0	15.0	1.0	5.0	1.0	0.0	24.0	0.0	24.0	0.0	1.0	0.0	0.0	16.0	0.0	0.0	0.0	467.0	802.0	374.0
OTU607569557	Bacteria; Proteobacteria; Deltaproteobacteria; Desulfobacterales; Desulfobulbaceae	0.0	0.0	4.0	0.0	0.0	5.0	141.0	1.0	12.0	0.0	1.0	0.0	485.0	178.0	259.0	63.0	208.0	102.0	27.0	69.0	78.0	0.0	0.0	0.0	0.0	18.0	5.0	0.0	0.0	0.0	3.0	0.0	0.0	0.0	0.0	2.0	0.0	0.0	0.0	21.0	18.0	26.0
OTU787931016	Unassigned	0.0	10.0	1.0	0.0	0.0	2.0	0.0	0.0	0.0	0.0	0.0	0.0	0.0	0.0	0.0	3.0	35.0	1.0	3.0	0.0	0.0	4.0	0.0	8.0	0.0	0.0	1.0	0.0	0.0	0.0	8.0	0.0	0.0	0.0	79.0	0.0	0.0	0.0	0.0	0.0	0.0	0.0
OTU796999003	Bacteria; Proteobacteria; Deltaproteobacteria; Desulfobacterales; Desulfobulbaceae; Desulfobulbus	0.0	0.0	1.0	0.0	0.0	0.0	0.0	0.0	0.0	0.0	0.0	0.0	0.0	141.0	9.0	26.0	19.0	75.0	0.0	0.0	0.0	0.0	0.0	2.0	1.0	1.0	0.0	0.0	0.0	0.0	1.0	0.0	0.0	0.0	0.0	0.0	0.0	0.0	0.0	0.0	0.0	0.0
OTU250488943	Bacteria; Bacteroidetes	6.0	2.0	0.0	5.0	2.0	0.0	0.0	0.0	0.0	0.0	3.0	0.0	0.0	0.0	0.0	1.0	7.0	3.0	2.0	5.0	1.0	2.0	9.0	5.0	0.0	2.0	0.0	432.0	10.0	0.0	1.0	0.0	0.0	0.0	0.0	0.0	0.0	0.0	0.0	0.0	2.0	0.0
OTU971150461	Bacteria; Parcubacteria; Candidatus Nomurabacteria	0.0	0.0	0.0	0.0	0.0	0.0	0.0	0.0	4.0	55.0	5.0	6.0	0.0	0.0	0.0	2.0	0.0	0.0	11.0	0.0	7.0	4.0	10.0	5.0	1.0	1.0	0.0	2.0	5.0	0.0	14.0	16.0	0.0	5.0	0.0	7.0	27.0	0.0	0.0	0.0	0.0	1.0
OTU216323194	Bacteria; Parcubacteria; Candidatus Falkowbacteria; uncultured Parcubacteria group bacterium; uncultured Parcubacteria group bacterium; uncultured Parcubacteria group bacterium; uncultured Parcubacteria group bacterium	0.0	0.0	0.0	0.0	2.0	0.0	6.0	3.0	4.0	4.0	0.0	5.0	0.0	1.0	0.0	0.0	17.0	2.0	0.0	0.0	0.0	0.0	3.0	0.0	0.0	0.0	0.0	0.0	0.0	4.0	2.0	0.0	0.0	0.0	0.0	2.0	0.0	0.0	0.0	61.0	7.0	72.0
OTU193985698	Bacteria; Proteobacteria; Deltaproteobacteria; FW113; uncultured organism; uncultured organism; uncultured organism	6.0	47.0	39.0	5.0	8.0	2.0	76.0	59.0	51.0	9.0	10.0	2.0	39.0	21.0	15.0	6.0	20.0	30.0	49.0	18.0	9.0	144.0	12.0	106.0	3.0	10.0	9.0	32.0	39.0	47.0	52.0	5.0	0.0	0.0	56.0	37.0	0.0	0.0	0.0	18.0	17.0	37.0
OTU850630809	Bacteria; Chloroflexi; Anaerolineae; Anaerolineales; Anaerolineaceae; uncultured; uncultured bacterium	0.0	0.0	0.0	0.0	0.0	0.0	0.0	0.0	0.0	0.0	0.0	0.0	0.0	0.0	0.0	49.0	33.0	32.0	0.0	0.0	0.0	0.0	0.0	0.0	28.0	119.0	2.0	10.0	0.0	0.0	0.0	0.0	0.0	0.0	0.0	0.0	0.0	0.0	0.0	0.0	0.0	0.0
OTU483002252	Bacteria; Proteobacteria; Deltaproteobacteria; Desulfobacterales; Desulfobulbaceae; Desulfurivibrio; uncultured bacterium	0.0	0.0	0.0	0.0	0.0	0.0	4.0	0.0	2.0	0.0	1.0	0.0	37.0	14.0	18.0	193.0	143.0	127.0	24.0	23.0	49.0	0.0	0.0	0.0	276.0	51.0	38.0	0.0	0.0	0.0	2.0	1.0	1.0	0.0	0.0	0.0	0.0	0.0	0.0	0.0	1.0	1.0
OTU565862340	Bacteria; WS2; uncultured bacterium; uncultured bacterium; uncultured bacterium; uncultured bacterium; uncultured bacterium	0.0	0.0	0.0	0.0	0.0	0.0	0.0	0.0	0.0	0.0	0.0	0.0	0.0	0.0	0.0	2.0	27.0	1.0	0.0	0.0	0.0	0.0	0.0	0.0	73.0	35.0	58.0	0.0	0.0	0.0	0.0	0.0	0.0	0.0	0.0	0.0	0.0	0.0	0.0	0.0	0.0	0.0
OTU20740134	Unassigned	1.0	2.0	5.0	0.0	0.0	2.0	0.0	0.0	0.0	1.0	3.0	1.0	0.0	4.0	1.0	4.0	4.0	17.0	0.0	6.0	11.0	6.0	2.0	19.0	2.0	0.0	0.0	73.0	41.0	100.0	2.0	0.0	0.0	0.0	0.0	0.0	0.0	0.0	0.0	1.0	4.0	0.0
OTU180277269	Unassigned	0.0	0.0	5.0	0.0	7.0	0.0	11.0	10.0	12.0	11.0	30.0	10.0	28.0	1.0	6.0	2.0	4.0	5.0	9.0	11.0	0.0	0.0	66.0	0.0	0.0	4.0	6.0	0.0	0.0	37.0	6.0	7.0	0.0	0.0	0.0	0.0	0.0	1.0	0.0	20.0	157.0	5.0
OTU80874873	Bacteria; Proteobacteria; Deltaproteobacteria; Myxococcales; Haliangiaceae; Haliangium; uncultured bacterium	0.0	1.0	4.0	0.0	0.0	0.0	15.0	12.0	37.0	0.0	7.0	0.0	28.0	5.0	5.0	1.0	4.0	4.0	74.0	89.0	52.0	0.0	0.0	0.0	0.0	0.0	0.0	0.0	0.0	0.0	0.0	14.0	0.0	0.0	0.0	0.0	0.0	0.0	0.0	20.0	28.0	0.0
OTU845439347	Bacteria; Proteobacteria; Deltaproteobacteria; FW113; uncultured bacterium; uncultured bacterium; uncultured bacterium	0.0	3.0	0.0	23.0	0.0	1.0	0.0	0.0	0.0	2.0	3.0	2.0	2.0	0.0	0.0	4.0	22.0	0.0	5.0	0.0	1.0	0.0	0.0	18.0	5.0	16.0	5.0	1.0	0.0	53.0	4.0	0.0	0.0	0.0	0.0	10.0	0.0	0.0	0.0	1.0	0.0	0.0
OTU584853759	Bacteria; Parcubacteria; Candidatus Moranbacteria; uncultured bacterium; uncultured bacterium; uncultured bacterium; uncultured bacterium	0.0	1.0	0.0	0.0	0.0	0.0	0.0	0.0	0.0	0.0	0.0	0.0	0.0	0.0	0.0	26.0	34.0	14.0	0.0	0.0	0.0	0.0	5.0	6.0	4.0	47.0	15.0	0.0	0.0	0.0	0.0	0.0	0.0	0.0	0.0	0.0	0.0	0.0	0.0	0.0	0.0	2.0
OTU174860913	Bacteria; Proteobacteria; Deltaproteobacteria; Desulfobacterales; Desulfobulbaceae; Desulfurivibrio; uncultured bacterium	0.0	0.0	0.0	0.0	0.0	0.0	0.0	0.0	0.0	0.0	0.0	0.0	0.0	0.0	0.0	27.0	10.0	19.0	0.0	0.0	0.0	0.0	0.0	0.0	135.0	4.0	0.0	0.0	0.0	0.0	0.0	0.0	0.0	0.0	0.0	0.0	0.0	0.0	0.0	0.0	0.0	0.0
OTU286719404	Bacteria; Ignavibacteriae; Ignavibacteria; Ignavibacteriales; Ignavibacteriales Incertae Sedis; Melioribacter	6.0	9.0	91.0	78.0	24.0	21.0	32.0	68.0	33.0	9.0	7.0	0.0	30.0	22.0	6.0	14.0	37.0	9.0	38.0	64.0	80.0	0.0	0.0	10.0	1.0	1.0	0.0	156.0	38.0	208.0	0.0	0.0	0.0	20.0	0.0	2.0	0.0	0.0	0.0	24.0	32.0	1.0
OTU730847945	Bacteria; Peregrinibacteria	0.0	0.0	0.0	0.0	0.0	0.0	0.0	0.0	0.0	4.0	0.0	0.0	0.0	1.0	0.0	25.0	28.0	35.0	0.0	0.0	0.0	0.0	0.0	0.0	51.0	74.0	20.0	0.0	0.0	0.0	0.0	0.0	0.0	0.0	0.0	0.0	0.0	0.0	0.0	21.0	0.0	0.0
OTU849873711	Bacteria; Ignavibacteriae; Ignavibacteria; Ignavibacteriales; IheB3-7; uncultured bacterium; uncultured bacterium	42.0	36.0	6.0	1.0	6.0	13.0	209.0	254.0	400.0	16.0	2.0	2.0	205.0	185.0	31.0	35.0	93.0	94.0	47.0	9.0	154.0	272.0	190.0	85.0	263.0	1062.0	301.0	15.0	0.0	42.0	413.0	23.0	0.0	0.0	49.0	39.0	40.0	18.0	0.0	218.0	277.0	152.0
OTU939510785	Bacteria; Cyanobacteria; Melainabacteria; Gastranaerophilales	39.0	14.0	18.0	4.0	6.0	5.0	89.0	35.0	29.0	178.0	74.0	60.0	13.0	21.0	42.0	10.0	28.0	8.0	55.0	18.0	13.0	3.0	1.0	0.0	3.0	2.0	4.0	0.0	0.0	12.0	90.0	57.0	88.0	0.0	86.0	28.0	0.0	0.0	0.0	123.0	192.0	29.0
OTU227892281	Bacteria; Ignavibacteriae; Ignavibacteria; Ignavibacteriales; SR-FBR-L83; uncultured bacterium; uncultured bacterium	367.0	104.0	64.0	5.0	6.0	6.0	121.0	89.0	203.0	91.0	48.0	126.0	155.0	34.0	64.0	94.0	32.0	44.0	131.0	143.0	89.0	81.0	83.0	48.0	18.0	6.0	54.0	125.0	241.0	51.0	83.0	5.0	0.0	0.0	297.0	203.0	0.0	39.0	0.0	231.0	624.0	58.0
OTU717250905	Bacteria; Proteobacteria; Deltaproteobacteria; Desulfobacterales; Desulfobulbaceae; MSBL7; uncultured bacterium	0.0	0.0	0.0	0.0	0.0	0.0	7.0	0.0	2.0	0.0	0.0	1.0	10.0	6.0	97.0	13.0	85.0	21.0	11.0	49.0	1.0	0.0	0.0	0.0	1.0	2.0	2.0	0.0	10.0	0.0	6.0	15.0	18.0	0.0	0.0	0.0	0.0	0.0	0.0	0.0	1.0	8.0
OTU845575552	Bacteria; Bacteroidetes; Sphingobacteriia; Sphingobacteriales; Lentimicrobiaceae	0.0	7.0	1.0	0.0	0.0	0.0	0.0	0.0	0.0	4.0	5.0	0.0	0.0	2.0	0.0	5.0	23.0	7.0	0.0	0.0	0.0	6.0	1.0	13.0	36.0	24.0	3.0	18.0	34.0	31.0	5.0	0.0	0.0	0.0	0.0	0.0	0.0	0.0	0.0	0.0	4.0	0.0
OTU551350733	Bacteria; Planctomycetes; Planctomycetacia; Planctomycetales; Planctomycetaceae; uncultured; uncultured bacterium	65.0	120.0	168.0	1.0	2.0	0.0	65.0	67.0	40.0	6.0	3.0	0.0	0.0	4.0	0.0	118.0	110.0	111.0	46.0	6.0	31.0	5.0	15.0	31.0	466.0	832.0	379.0	223.0	0.0	18.0	20.0	1.0	0.0	0.0	34.0	0.0	0.0	0.0	0.0	20.0	34.0	27.0
OTU870270248	Bacteria; Lentisphaerae; Lentisphaeria; Victivallales; PRD18C08; uncultured Lentisphaerae bacterium; uncultured Lentisphaerae bacterium	12.0	9.0	13.0	4.0	3.0	6.0	4.0	0.0	4.0	20.0	7.0	8.0	7.0	18.0	2.0	103.0	42.0	536.0	27.0	18.0	7.0	8.0	11.0	84.0	33.0	181.0	6.0	7.0	50.0	4.0	33.0	23.0	0.0	0.0	40.0	2.0	20.0	1.0	0.0	10.0	29.0	20.0
OTU853741604	Archaea; Woesearchaeota (DHVEG-6)	0.0	0.0	0.0	0.0	0.0	0.0	0.0	0.0	0.0	0.0	0.0	0.0	0.0	0.0	0.0	5.0	103.0	18.0	0.0	0.0	0.0	0.0	0.0	0.0	21.0	32.0	1.0	0.0	0.0	0.0	0.0	0.0	0.0	0.0	0.0	0.0	0.0	0.0	0.0	0.0	0.0	0.0
OTU682621204	Bacteria; Chloroflexi; Anaerolineae; Anaerolineales; Anaerolineaceae; Leptolinea	570.0	426.0	278.0	43.0	47.0	32.0	56.0	138.0	282.0	60.0	59.0	56.0	79.0	47.0	22.0	49.0	48.0	87.0	138.0	92.0	121.0	39.0	59.0	171.0	50.0	48.0	24.0	67.0	73.0	72.0	83.0	32.0	40.0	31.0	293.0	179.0	33.0	80.0	51.0	83.0	154.0	60.0
OTU174670552	Bacteria; Chloroflexi; Anaerolineae; Anaerolineales; Anaerolineaceae; Longilinea	0.0	0.0	0.0	8.0	5.0	0.0	3.0	2.0	5.0	2.0	4.0	2.0	4.0	3.0	3.0	6.0	17.0	12.0	13.0	9.0	3.0	0.0	0.0	0.0	0.0	1.0	0.0	0.0	0.0	0.0	7.0	18.0	2.0	0.0	0.0	30.0	0.0	21.0	7.0	5.0	10.0	7.0
OTU160930106	Bacteria; Proteobacteria; Alphaproteobacteria; Rhizobiales; Xanthobacteraceae; Variibacter	0.0	0.0	0.0	0.0	0.0	0.0	0.0	0.0	0.0	2.0	0.0	0.0	0.0	0.0	0.0	14.0	33.0	34.0	0.0	0.0	0.0	0.0	0.0	0.0	56.0	40.0	35.0	0.0	0.0	0.0	3.0	0.0	0.0	0.0	0.0	0.0	0.0	0.0	0.0	0.0	1.0	0.0
OTU134297989	Bacteria; Planctomycetes; Pla4 lineage; uncultured organism; uncultured organism; uncultured organism; uncultured organism	1.0	5.0	1.0	0.0	0.0	0.0	14.0	4.0	2.0	5.0	2.0	0.0	7.0	9.0	8.0	4.0	14.0	13.0	0.0	41.0	26.0	2.0	5.0	12.0	10.0	2.0	13.0	0.0	20.0	0.0	0.0	0.0	0.0	0.0	0.0	1.0	0.0	0.0	0.0	14.0	3.0	9.0
OTU824589432	Bacteria; Bacteroidetes; Bacteroidetes BD2-2; uncultured bacterium; uncultured bacterium; uncultured bacterium; uncultured bacterium	26.0	3.0	5.0	0.0	1.0	1.0	0.0	3.0	21.0	2.0	0.0	2.0	2.0	0.0	6.0	27.0	5.0	38.0	12.0	4.0	23.0	0.0	0.0	0.0	20.0	9.0	29.0	11.0	0.0	14.0	0.0	0.0	0.0	0.0	0.0	0.0	0.0	0.0	0.0	2.0	4.0	3.0
OTU850069458	Bacteria; Firmicutes; Clostridia; Clostridiales; Christensenellaceae; Christensenellaceae R-7 group; Ambiguous_taxa	0.0	0.0	0.0	0.0	0.0	0.0	5.0	0.0	0.0	11.0	3.0	6.0	1.0	2.0	0.0	23.0	33.0	47.0	0.0	0.0	0.0	2.0	1.0	33.0	110.0	41.0	559.0	0.0	0.0	9.0	47.0	1.0	0.0	0.0	2.0	16.0	0.0	53.0	0.0	0.0	0.0	0.0
OTU25101558	Bacteria; Proteobacteria; Deltaproteobacteria; Desulfobacterales; Desulfobulbaceae; Desulfobulbus	0.0	0.0	0.0	0.0	1.0	2.0	0.0	0.0	0.0	0.0	0.0	0.0	0.0	0.0	0.0	0.0	9.0	0.0	0.0	0.0	1.0	63.0	0.0	0.0	5.0	41.0	329.0	0.0	0.0	0.0	19.0	0.0	0.0	0.0	0.0	12.0	0.0	0.0	0.0	0.0	0.0	0.0
OTU929146247	Bacteria; Nitrospinae; MD2898-B26; uncultured bacterium; uncultured bacterium; uncultured bacterium; uncultured bacterium	0.0	2.0	0.0	1.0	4.0	0.0	83.0	72.0	242.0	2.0	12.0	5.0	40.0	37.0	68.0	16.0	75.0	9.0	70.0	212.0	453.0	4.0	0.0	30.0	2.0	3.0	3.0	0.0	14.0	16.0	10.0	0.0	9.0	0.0	0.0	12.0	0.0	0.0	0.0	305.0	313.0	182.0
OTU922365987	Bacteria; Verrucomicrobia; OPB35 soil group; uncultured bacterium; uncultured bacterium; uncultured bacterium; uncultured bacterium	2.0	5.0	12.0	7.0	11.0	7.0	11.0	6.0	15.0	3.0	2.0	3.0	10.0	16.0	10.0	48.0	59.0	29.0	18.0	5.0	19.0	2.0	22.0	16.0	37.0	81.0	67.0	43.0	5.0	36.0	20.0	3.0	0.0	0.0	0.0	0.0	0.0	0.0	41.0	2.0	5.0	8.0
OTU669625407	Bacteria; Chlorobi; Chlorobia; Chlorobiales; OPB56; uncultured bacterium; uncultured bacterium	2.0	1.0	2.0	0.0	0.0	0.0	0.0	0.0	0.0	0.0	0.0	0.0	2.0	10.0	3.0	37.0	26.0	23.0	3.0	1.0	3.0	0.0	3.0	9.0	42.0	18.0	2.0	0.0	30.0	6.0	13.0	0.0	0.0	0.0	87.0	6.0	0.0	0.0	0.0	1.0	0.0	2.0
OTU727535887	Bacteria; Deferribacteres; Deferribacteres Incertae Sedis; Unknown Order; Unknown Family; Caldithrix; uncultured bacterium	3.0	0.0	0.0	2.0	2.0	2.0	1.0	0.0	3.0	14.0	0.0	3.0	0.0	3.0	1.0	4.0	14.0	15.0	0.0	0.0	1.0	0.0	12.0	13.0	7.0	2.0	2.0	2.0	14.0	35.0	0.0	0.0	0.0	0.0	0.0	0.0	0.0	0.0	0.0	2.0	0.0	0.0
OTU638491141	Bacteria; Proteobacteria; Deltaproteobacteria; Desulfobacterales; Desulfobacteraceae; SEEP-SRB1; uncultured bacterium	0.0	0.0	0.0	0.0	0.0	0.0	0.0	0.0	0.0	0.0	0.0	0.0	0.0	0.0	0.0	0.0	166.0	59.0	0.0	0.0	0.0	0.0	0.0	2.0	0.0	5.0	0.0	0.0	0.0	0.0	0.0	0.0	0.0	0.0	0.0	0.0	0.0	0.0	0.0	0.0	0.0	0.0
OTU464042477	Bacteria; Bacteroidetes; Sphingobacteriia; Sphingobacteriales; Lentimicrobiaceae; Ambiguous_taxa	0.0	0.0	0.0	0.0	0.0	0.0	0.0	0.0	0.0	0.0	0.0	0.0	0.0	0.0	0.0	25.0	79.0	25.0	0.0	0.0	0.0	0.0	0.0	11.0	10.0	16.0	36.0	0.0	0.0	0.0	6.0	0.0	0.0	0.0	0.0	0.0	0.0	0.0	0.0	0.0	1.0	0.0
OTU642808664	Bacteria; Acidobacteria; Holophagae; Holophagales; Holophagaceae; uncultured	0.0	0.0	0.0	0.0	0.0	0.0	0.0	0.0	0.0	0.0	0.0	0.0	0.0	0.0	0.0	62.0	27.0	11.0	2.0	0.0	1.0	0.0	0.0	0.0	52.0	50.0	0.0	0.0	0.0	0.0	22.0	0.0	0.0	0.0	0.0	0.0	0.0	0.0	0.0	0.0	0.0	1.0
OTU694052212	Bacteria; Chloroflexi; Anaerolineae; Anaerolineales; Anaerolineaceae; uncultured	0.0	10.0	4.0	3.0	0.0	0.0	2.0	0.0	10.0	2.0	7.0	3.0	1.0	21.0	7.0	10.0	18.0	2.0	6.0	16.0	17.0	50.0	7.0	7.0	3.0	2.0	8.0	0.0	34.0	76.0	20.0	13.0	26.0	0.0	20.0	100.0	0.0	10.0	0.0	3.0	7.0	21.0
OTU254341102	Bacteria; Proteobacteria; Betaproteobacteria; Burkholderiales; Burkholderiaceae; Polynucleobacter; uncultured bacterium	42.0	118.0	143.0	71.0	66.0	38.0	2.0	7.0	4.0	0.0	51.0	93.0	11.0	2.0	1.0	0.0	1.0	0.0	0.0	0.0	4.0	179.0	124.0	82.0	1.0	1.0	1.0	94.0	132.0	230.0	34.0	0.0	0.0	0.0	22.0	10.0	0.0	0.0	0.0	0.0	3.0	7.0
OTU597292324	Bacteria; Proteobacteria; Gammaproteobacteria; Chromatiales; Halothiobacillaceae; Thiovirga; uncultured bacterium	2121.0	2673.0	4135.0	2143.0	3226.0	7272.0	64.0	47.0	46.0	3887.0	6718.0	8688.0	1732.0	85.0	24.0	2.0	2.0	5.0	0.0	6.0	87.0	795.0	1097.0	521.0	21.0	225.0	58.0	3969.0	1536.0	5101.0	528.0	15.0	20.0	0.0	104.0	1.0	0.0	0.0	1.0	9.0	2.0	487.0
OTU902876847	Bacteria; Firmicutes; Clostridia; Clostridiales; Family XII; Fusibacter; uncultured bacterium	46.0	14.0	84.0	750.0	696.0	384.0	24.0	10.0	22.0	5.0	20.0	49.0	16.0	5.0	2.0	0.0	18.0	0.0	18.0	37.0	22.0	111.0	433.0	25.0	0.0	5.0	24.0	323.0	162.0	499.0	347.0	147.0	123.0	2.0	128.0	231.0	65.0	219.0	296.0	11.0	61.0	7.0
OTU452761978	Bacteria; Proteobacteria; Epsilonproteobacteria; Campylobacterales; Helicobacteraceae; Sulfurimonas; Ambiguous_taxa	215.0	9.0	7.0	248.0	297.0	269.0	172.0	405.0	56.0	33.0	82.0	25.0	278.0	2891.0	320.0	17.0	22.0	31.0	106.0	58.0	214.0	6.0	27.0	13.0	3.0	21.0	3.0	38.0	103.0	30.0	290.0	232.0	123.0	0.0	0.0	161.0	20.0	0.0	1.0	242.0	77.0	563.0
OTU476968467	Bacteria; Bacteroidetes; Flavobacteriia; Flavobacteriales; Flavobacteriaceae; Flavobacterium	301.0	1.0	9.0	200.0	28.0	14.0	0.0	7.0	30.0	87.0	60.0	6.0	2.0	38.0	0.0	0.0	1.0	38.0	0.0	0.0	0.0	1076.0	684.0	554.0	6.0	220.0	21.0	2076.0	1430.0	936.0	230.0	3.0	0.0	0.0	7.0	0.0	216.0	0.0	59.0	0.0	0.0	29.0
OTU387328253	Bacteria; Nitrospinae; MD2898-B26; uncultured bacterium; uncultured bacterium; uncultured bacterium; uncultured bacterium	8.0	0.0	2.0	0.0	0.0	2.0	0.0	1.0	0.0	54.0	60.0	58.0	1.0	2.0	1.0	0.0	0.0	0.0	14.0	39.0	4.0	4.0	5.0	10.0	0.0	0.0	1.0	155.0	0.0	121.0	3.0	9.0	0.0	0.0	34.0	0.0	41.0	0.0	0.0	1.0	0.0	0.0
OTU282371149	Bacteria; Nitrospirae; Nitrospira; Nitrospirales; Nitrospiraceae; uncultured	0.0	6.0	7.0	0.0	0.0	0.0	4.0	30.0	30.0	21.0	25.0	174.0	1006.0	1132.0	122.0	0.0	0.0	0.0	0.0	3.0	0.0	61.0	2.0	0.0	1.0	13.0	0.0	0.0	16.0	7.0	4.0	7.0	1.0	0.0	0.0	0.0	0.0	0.0	0.0	0.0	0.0	0.0
OTU238405418	Bacteria; Proteobacteria; Betaproteobacteria; Burkholderiales; Comamonadaceae	1664.0	208.0	118.0	715.0	510.0	1378.0	34.0	26.0	47.0	370.0	279.0	300.0	509.0	28.0	2.0	0.0	3.0	2.0	4.0	2.0	5.0	250.0	892.0	296.0	1.0	21.0	11.0	133.0	248.0	376.0	64.0	17.0	0.0	0.0	0.0	0.0	0.0	0.0	34.0	6.0	14.0	50.0
OTU44171240	Bacteria; Proteobacteria; Epsilonproteobacteria; Campylobacterales; Helicobacteraceae; Sulfurovum	5.0	2.0	3.0	1.0	7.0	2.0	3.0	8.0	0.0	11.0	37.0	10.0	3.0	4.0	14.0	0.0	0.0	2.0	4.0	5.0	3.0	15.0	60.0	19.0	0.0	1.0	1.0	69.0	121.0	131.0	27.0	27.0	70.0	0.0	32.0	2.0	243.0	49.0	67.0	3.0	3.0	3.0
OTU53724844	Bacteria; Proteobacteria; Betaproteobacteria; Burkholderiales; Comamonadaceae; Hydrogenophaga; uncultured bacterium	172.0	19.0	239.0	928.0	478.0	2392.0	2.0	1.0	26.0	65.0	82.0	1.0	11.0	1.0	10.0	0.0	6.0	0.0	0.0	0.0	0.0	1080.0	919.0	128.0	1.0	6.0	40.0	627.0	770.0	531.0	0.0	0.0	0.0	0.0	0.0	0.0	0.0	0.0	0.0	0.0	0.0	9.0
OTU227955931	Bacteria; Nitrospinae; MD2898-B26; uncultured bacterium; uncultured bacterium; uncultured bacterium; uncultured bacterium	1.0	39.0	13.0	0.0	1.0	5.0	15.0	8.0	35.0	51.0	57.0	66.0	36.0	5.0	45.0	0.0	6.0	5.0	27.0	310.0	45.0	24.0	61.0	37.0	0.0	2.0	3.0	48.0	42.0	49.0	57.0	0.0	0.0	0.0	0.0	0.0	64.0	0.0	0.0	74.0	138.0	13.0
OTU840276576	Bacteria; Proteobacteria; Epsilonproteobacteria; Campylobacterales; Helicobacteraceae; Sulfurimonas; uncultured bacterium	258.0	2.0	0.0	19.0	381.0	9.0	37.0	125.0	11.0	42.0	27.0	176.0	315.0	543.0	182.0	4.0	8.0	226.0	27.0	77.0	43.0	0.0	1.0	0.0	15.0	2.0	0.0	0.0	6.0	0.0	0.0	0.0	0.0	0.0	1.0	0.0	46.0	0.0	0.0	41.0	15.0	308.0
OTU574987583	Bacteria; Bacteroidetes; Flavobacteriia; Flavobacteriales; Flavobacteriaceae; Flavobacterium; Ambiguous_taxa	40.0	0.0	3.0	3.0	1.0	4.0	0.0	0.0	1.0	16.0	4.0	2.0	1.0	2.0	0.0	1.0	0.0	0.0	0.0	0.0	0.0	9.0	5.0	50.0	1.0	27.0	2.0	200.0	244.0	931.0	15.0	0.0	0.0	0.0	0.0	0.0	0.0	0.0	0.0	0.0	0.0	0.0
OTU263523730	Bacteria; Proteobacteria; Deltaproteobacteria; Bdellovibrionales; Bacteriovoracaceae; Deferrisoma; uncultured bacterium	0.0	0.0	0.0	0.0	0.0	0.0	13.0	23.0	14.0	0.0	0.0	0.0	13.0	146.0	1.0	8.0	22.0	2.0	5.0	119.0	114.0	0.0	0.0	0.0	0.0	0.0	0.0	0.0	0.0	0.0	2.0	0.0	0.0	0.0	0.0	0.0	0.0	0.0	0.0	0.0	1.0	8.0
OTU188698717	Bacteria; Proteobacteria; Betaproteobacteria; Burkholderiales; Comamonadaceae; Leptothrix	6.0	0.0	26.0	149.0	28.0	14.0	0.0	1.0	0.0	9.0	10.0	14.0	0.0	0.0	0.0	0.0	0.0	0.0	0.0	0.0	1.0	14.0	19.0	62.0	0.0	19.0	5.0	54.0	62.0	19.0	0.0	0.0	0.0	0.0	0.0	0.0	0.0	0.0	0.0	0.0	0.0	0.0
OTU240301422	Bacteria; Proteobacteria; Epsilonproteobacteria; Campylobacterales; Campylobacteraceae; Arcobacter; uncultured Epsilonproteobacteria bacterium	1.0	106.0	1.0	485.0	0.0	0.0	1.0	1.0	0.0	122.0	0.0	0.0	45.0	8.0	5.0	0.0	0.0	0.0	0.0	79.0	1.0	53.0	237.0	122.0	0.0	0.0	0.0	860.0	0.0	52.0	0.0	4.0	0.0	0.0	0.0	0.0	0.0	0.0	0.0	0.0	0.0	0.0
OTU790863699	Bacteria; Proteobacteria; Betaproteobacteria; Rhodocyclales; Rhodocyclaceae; Dechloromonas; uncultured bacterium	2.0	0.0	1245.0	5.0	3.0	3.0	198.0	3.0	5.0	1.0	198.0	1.0	63.0	0.0	0.0	205.0	6.0	11.0	0.0	11.0	0.0	12509.0	0.0	11.0	2.0	0.0	0.0	21.0	0.0	11.0	48.0	2.0	2.0	0.0	0.0	0.0	0.0	2.0	0.0	0.0	0.0	2.0
OTU919157449	Bacteria; Nitrospirae; Nitrospira; Nitrospirales; Nitrospiraceae; uncultured	0.0	1.0	0.0	0.0	1.0	0.0	7.0	3.0	11.0	1.0	0.0	0.0	357.0	60.0	59.0	0.0	0.0	5.0	0.0	0.0	0.0	0.0	10.0	6.0	1.0	0.0	0.0	11.0	0.0	0.0	4.0	0.0	0.0	0.0	0.0	0.0	0.0	0.0	0.0	0.0	0.0	0.0
OTU332460491	Bacteria; Proteobacteria; Betaproteobacteria; Burkholderiales; Oxalobacteraceae; uncultured; Ambiguous_taxa	0.0	0.0	9.0	3.0	4.0	1.0	21.0	15.0	5.0	0.0	0.0	1.0	0.0	7.0	1.0	0.0	0.0	0.0	0.0	17.0	41.0	1271.0	563.0	358.0	0.0	0.0	19.0	0.0	83.0	0.0	27.0	1.0	0.0	0.0	562.0	121.0	0.0	0.0	0.0	15.0	13.0	16.0
OTU185834371	Bacteria; Tenericutes; Mollicutes; NB1-n	75.0	33.0	8.0	136.0	154.0	243.0	110.0	279.0	301.0	320.0	756.0	264.0	106.0	45.0	40.0	6.0	1.0	13.0	179.0	64.0	44.0	14.0	32.0	62.0	0.0	0.0	3.0	351.0	662.0	38.0	238.0	119.0	31.0	0.0	88.0	27.0	0.0	0.0	59.0	254.0	735.0	146.0
OTU588764053	Bacteria; Parcubacteria; uncultured bacterium; uncultured bacterium; uncultured bacterium; uncultured bacterium; uncultured bacterium	33.0	7.0	9.0	3.0	6.0	2.0	14.0	34.0	26.0	9.0	43.0	24.0	20.0	15.0	1.0	16.0	0.0	56.0	7.0	82.0	7.0	5.0	56.0	20.0	5.0	1.0	4.0	62.0	80.0	0.0	11.0	64.0	41.0	0.0	67.0	63.0	0.0	64.0	0.0	60.0	34.0	12.0
OTU739238309	Bacteria; Parcubacteria; Candidatus Falkowbacteria; uncultured bacterium; uncultured bacterium; uncultured bacterium; uncultured bacterium	88.0	1.0	63.0	69.0	196.0	1.0	352.0	217.0	1469.0	5961.0	14126.0	791.0	126.0	0.0	157.0	0.0	1.0	2.0	66.0	6.0	0.0	3.0	61.0	0.0	0.0	0.0	0.0	0.0	85.0	28.0	120.0	9650.0	2689.0	0.0	10.0	371.0	137.0	1.0	0.0	9830.0	2018.0	0.0
OTU466311615	Bacteria; Proteobacteria; Gammaproteobacteria; Pseudomonadales; Pseudomonadaceae; Pseudomonas	3796.0	2522.0	22.0	1.0	148.0	86.0	0.0	0.0	5.0	0.0	601.0	0.0	2.0	0.0	0.0	0.0	0.0	0.0	0.0	44.0	0.0	857.0	645.0	140.0	0.0	0.0	0.0	0.0	1.0	1.0	0.0	0.0	2.0	0.0	0.0	0.0	1.0	0.0	0.0	0.0	1.0	0.0
OTU366162214	Bacteria; Firmicutes; Erysipelotrichia; Erysipelotrichales; Erysipelotrichaceae; Erysipelothrix; uncultured bacterium	68.0	12.0	1.0	11.0	14.0	13.0	13.0	17.0	9.0	17.0	46.0	14.0	1.0	2.0	1.0	0.0	5.0	2.0	3.0	6.0	9.0	25.0	111.0	21.0	1.0	1.0	10.0	93.0	99.0	82.0	10.0	19.0	26.0	16.0	0.0	12.0	45.0	178.0	0.0	10.0	7.0	2.0
OTU801600014	Bacteria; Proteobacteria; Epsilonproteobacteria; Campylobacterales; Helicobacteraceae; Sulfurovum; uncultured bacterium	13.0	1.0	15.0	15.0	10.0	5.0	4.0	19.0	1.0	17.0	19.0	29.0	17.0	15.0	29.0	1.0	3.0	1.0	2.0	3.0	1.0	36.0	67.0	23.0	1.0	0.0	2.0	67.0	17.0	160.0	57.0	46.0	213.0	0.0	0.0	6.0	44.0	114.0	254.0	5.0	13.0	24.0
OTU422764161	Bacteria; Proteobacteria; Deltaproteobacteria; Desulfobacterales; Desulfobacteraceae; uncultured; uncultured bacterium	0.0	0.0	0.0	0.0	0.0	0.0	0.0	6.0	2.0	0.0	0.0	0.0	0.0	0.0	0.0	0.0	0.0	0.0	0.0	0.0	0.0	0.0	0.0	0.0	0.0	0.0	2.0	0.0	161.0	10.0	0.0	0.0	0.0	0.0	39.0	0.0	0.0	0.0	0.0	0.0	0.0	0.0
OTU238101737	Bacteria; Proteobacteria; Deltaproteobacteria; Desulfobacterales; Desulfobacteraceae; Desulfatirhabdium; Ambiguous_taxa	54.0	218.0	170.0	12.0	4.0	5.0	23.0	35.0	31.0	4.0	26.0	23.0	56.0	71.0	28.0	15.0	16.0	25.0	14.0	19.0	14.0	27.0	26.0	62.0	29.0	23.0	80.0	105.0	293.0	138.0	51.0	6.0	9.0	0.0	144.0	71.0	111.0	15.0	82.0	20.0	76.0	29.0
OTU366352790	Bacteria; Planctomycetes; Planctomycetacia; Planctomycetales; Planctomycetaceae; uncultured; uncultured planctomycete	17.0	12.0	28.0	7.0	5.0	4.0	13.0	17.0	23.0	8.0	6.0	6.0	4.0	9.0	1.0	8.0	3.0	12.0	8.0	3.0	19.0	0.0	31.0	19.0	30.0	12.0	20.0	82.0	126.0	95.0	35.0	0.0	0.0	0.0	24.0	1.0	25.0	88.0	161.0	33.0	10.0	18.0
OTU880152634	Bacteria; Proteobacteria; Betaproteobacteria; Rhodocyclales; Rhodocyclaceae; Propionivibrio; uncultured bacterium	0.0	4.0	58.0	2.0	0.0	4.0	0.0	7.0	1.0	5.0	6.0	14.0	2.0	0.0	0.0	0.0	0.0	0.0	5.0	1.0	0.0	0.0	0.0	0.0	0.0	0.0	0.0	0.0	212.0	1.0	7.0	0.0	0.0	0.0	0.0	0.0	0.0	0.0	0.0	0.0	0.0	0.0
OTU953553171	Bacteria; Omnitrophica; uncultured bacterium; uncultured bacterium; uncultured bacterium; uncultured bacterium; uncultured bacterium	10.0	27.0	37.0	3.0	2.0	8.0	52.0	48.0	35.0	16.0	29.0	53.0	36.0	224.0	44.0	8.0	28.0	9.0	8.0	7.0	39.0	12.0	8.0	22.0	0.0	0.0	2.0	43.0	682.0	91.0	23.0	4.0	0.0	0.0	46.0	1.0	0.0	0.0	0.0	5.0	38.0	32.0
OTU522904706	Bacteria; Proteobacteria; Deltaproteobacteria; Desulfarculales; Desulfarculaceae; Desulfatiglans; uncultured delta proteobacterium	0.0	4.0	0.0	0.0	0.0	1.0	0.0	0.0	0.0	17.0	5.0	7.0	0.0	0.0	1.0	0.0	0.0	0.0	9.0	0.0	0.0	0.0	1.0	3.0	5.0	0.0	0.0	9.0	14.0	16.0	6.0	1.0	0.0	0.0	0.0	0.0	47.0	0.0	0.0	0.0	5.0	2.0
OTU210849036	Bacteria; Chloroflexi	19.0	60.0	27.0	1.0	1.0	3.0	60.0	4.0	19.0	12.0	1.0	2.0	2.0	2.0	1.0	22.0	32.0	12.0	14.0	10.0	19.0	67.0	13.0	122.0	7.0	3.0	22.0	65.0	127.0	103.0	28.0	0.0	9.0	0.0	91.0	11.0	83.0	0.0	0.0	7.0	10.0	29.0
OTU978540045	Unassigned	0.0	1.0	0.0	0.0	0.0	0.0	11.0	31.0	53.0	0.0	0.0	0.0	13.0	3.0	7.0	0.0	3.0	2.0	10.0	161.0	220.0	0.0	0.0	0.0	0.0	0.0	0.0	0.0	31.0	0.0	6.0	0.0	0.0	0.0	0.0	0.0	0.0	0.0	0.0	0.0	0.0	0.0
OTU438929105	Bacteria; Latescibacteria; uncultured bacterium; uncultured bacterium; uncultured bacterium; uncultured bacterium; uncultured bacterium	0.0	0.0	0.0	0.0	0.0	0.0	0.0	0.0	1.0	6.0	2.0	1.0	1.0	4.0	0.0	0.0	0.0	1.0	0.0	3.0	1.0	6.0	3.0	1.0	1.0	6.0	0.0	0.0	25.0	75.0	7.0	16.0	7.0	0.0	0.0	1.0	0.0	0.0	38.0	0.0	1.0	0.0
OTU453829355	Bacteria; Proteobacteria; Deltaproteobacteria; Desulfuromonadales; Desulfuromonadaceae; Desulfuromonas	0.0	5.0	0.0	0.0	0.0	0.0	44.0	1.0	11.0	0.0	0.0	0.0	5.0	0.0	1.0	7.0	2.0	9.0	22.0	397.0	414.0	0.0	0.0	0.0	0.0	0.0	0.0	0.0	0.0	0.0	35.0	13.0	0.0	0.0	29.0	0.0	0.0	1.0	0.0	0.0	0.0	1.0
OTU481561491	Bacteria; Chloroflexi; Anaerolineae; Anaerolineales; Anaerolineaceae; uncultured; Ambiguous_taxa	7.0	6.0	0.0	3.0	1.0	4.0	9.0	6.0	6.0	5.0	8.0	0.0	32.0	39.0	2.0	10.0	2.0	7.0	42.0	8.0	32.0	0.0	2.0	24.0	0.0	20.0	4.0	22.0	0.0	0.0	16.0	9.0	8.0	0.0	0.0	1.0	0.0	0.0	0.0	19.0	10.0	28.0
OTU663335299	Bacteria; Proteobacteria; Betaproteobacteria; Burkholderiales; Oxalobacteraceae	0.0	1.0	0.0	0.0	10.0	0.0	0.0	127.0	110.0	0.0	0.0	32.0	0.0	0.0	0.0	0.0	0.0	0.0	0.0	0.0	0.0	161.0	3001.0	1.0	0.0	0.0	0.0	0.0	137.0	2.0	0.0	0.0	0.0	0.0	0.0	1.0	0.0	0.0	0.0	0.0	170.0	0.0
OTU846446951	Bacteria; Proteobacteria; Deltaproteobacteria; Myxococcales; BIrii41; Ambiguous_taxa; Ambiguous_taxa	1407.0	339.0	1702.0	28.0	22.0	5.0	5.0	22.0	61.0	72.0	140.0	74.0	0.0	9.0	4.0	0.0	0.0	0.0	3.0	11.0	1.0	2.0	82.0	126.0	1.0	0.0	6.0	1080.0	0.0	1228.0	13.0	0.0	19.0	0.0	34.0	144.0	104.0	120.0	0.0	42.0	5.0	1.0
OTU290157370	Bacteria; Proteobacteria; Betaproteobacteria; Burkholderiales; Comamonadaceae; Ambiguous_taxa; Ambiguous_taxa	88.0	283.0	155.0	587.0	457.0	1265.0	0.0	4.0	0.0	33.0	27.0	160.0	7.0	1.0	0.0	0.0	0.0	2.0	2.0	0.0	2.0	88.0	192.0	60.0	4.0	8.0	9.0	2.0	23.0	53.0	1.0	0.0	0.0	0.0	50.0	0.0	0.0	0.0	27.0	0.0	0.0	42.0
OTU77260970	Bacteria; Proteobacteria; Epsilonproteobacteria; Campylobacterales; Campylobacteraceae; Arcobacter; Ambiguous_taxa	4.0	1.0	5.0	2.0	7.0	8.0	63.0	90.0	2.0	33.0	26.0	7.0	236.0	3316.0	373.0	5.0	4.0	16.0	23.0	31.0	106.0	10.0	26.0	12.0	1.0	1.0	0.0	57.0	68.0	29.0	9.0	15.0	0.0	0.0	25.0	16.0	17.0	1.0	33.0	75.0	5.0	1256.0
OTU443002312	Bacteria; Nitrospinae; MD2898-B26	0.0	0.0	4.0	1.0	9.0	0.0	31.0	185.0	224.0	4.0	1.0	4.0	11.0	20.0	7.0	2.0	35.0	3.0	179.0	447.0	2145.0	0.0	9.0	1.0	0.0	0.0	0.0	13.0	19.0	1.0	19.0	0.0	0.0	0.0	0.0	1.0	0.0	0.0	0.0	126.0	158.0	69.0
OTU938352643	Bacteria; Ignavibacteriae; Ignavibacteria; Ignavibacteriales; IheB3-7; uncultured bacterium; uncultured bacterium	168.0	111.0	91.0	1.0	1.0	0.0	10.0	32.0	20.0	61.0	46.0	12.0	3.0	0.0	3.0	7.0	11.0	9.0	4.0	9.0	218.0	13.0	0.0	11.0	2.0	3.0	0.0	338.0	442.0	186.0	0.0	20.0	0.0	27.0	0.0	12.0	0.0	0.0	0.0	3.0	8.0	0.0
OTU28947885	Bacteria; Parcubacteria; Candidatus Moranbacteria; uncultured bacterium; uncultured bacterium; uncultured bacterium; uncultured bacterium	0.0	1.0	0.0	1.0	0.0	0.0	0.0	0.0	0.0	3.0	0.0	0.0	2.0	1.0	0.0	20.0	58.0	58.0	0.0	0.0	0.0	0.0	4.0	0.0	14.0	66.0	0.0	0.0	0.0	0.0	10.0	0.0	0.0	0.0	0.0	0.0	0.0	0.0	0.0	2.0	0.0	0.0
OTU382890412	Bacteria; Proteobacteria; Betaproteobacteria; Burkholderiales; Comamonadaceae	0.0	3.0	2.0	6.0	4.0	7.0	0.0	1.0	0.0	2.0	1510.0	38.0	0.0	0.0	0.0	0.0	0.0	1.0	0.0	0.0	0.0	4.0	1.0	9.0	0.0	0.0	0.0	1.0	31.0	0.0	0.0	0.0	1.0	0.0	0.0	0.0	0.0	0.0	0.0	0.0	0.0	0.0
OTU210200335	Bacteria; Spirochaetae; Spirochaetes; Spirochaetales; Spirochaetaceae; Treponema	36.0	82.0	73.0	1.0	11.0	0.0	0.0	15.0	7.0	0.0	4.0	12.0	0.0	1.0	0.0	0.0	1.0	0.0	875.0	1039.0	396.0	0.0	0.0	17.0	4.0	1.0	4.0	109.0	53.0	0.0	4.0	0.0	29.0	0.0	45.0	103.0	2.0	0.0	0.0	0.0	0.0	0.0
OTU224790211	Bacteria; Proteobacteria; Deltaproteobacteria; Desulfobacterales; Desulfobacteraceae; Desulfatiferula	33.0	78.0	57.0	86.0	34.0	23.0	11.0	32.0	33.0	42.0	190.0	100.0	20.0	10.0	9.0	3.0	0.0	2.0	35.0	49.0	21.0	23.0	50.0	38.0	0.0	1.0	15.0	102.0	339.0	246.0	169.0	79.0	123.0	33.0	504.0	97.0	62.0	29.0	0.0	15.0	17.0	15.0
OTU186605566	Unassigned	0.0	0.0	0.0	4.0	0.0	0.0	1.0	3.0	0.0	3.0	0.0	5.0	3.0	4.0	7.0	0.0	1.0	0.0	2.0	221.0	4.0	0.0	0.0	1.0	0.0	1.0	0.0	13.0	245.0	44.0	1.0	0.0	0.0	0.0	0.0	0.0	0.0	0.0	0.0	3.0	5.0	5.0
OTU23798438	Bacteria; Proteobacteria; Deltaproteobacteria; Bdellovibrionales; Bacteriovoracaceae; Deferrisoma; uncultured delta proteobacterium	0.0	3.0	2.0	0.0	0.0	0.0	25.0	63.0	33.0	0.0	0.0	0.0	41.0	70.0	4.0	58.0	98.0	40.0	56.0	112.0	185.0	0.0	0.0	0.0	2.0	5.0	0.0	0.0	15.0	0.0	6.0	0.0	0.0	0.0	0.0	0.0	0.0	0.0	0.0	6.0	7.0	26.0
OTU888179304	Bacteria; Firmicutes; Clostridia; Clostridiales; Family XII; Acidaminobacter	1.0	2.0	1.0	8.0	3.0	3.0	3.0	4.0	7.0	11.0	115.0	5.0	5.0	1.0	1.0	0.0	0.0	0.0	56.0	16.0	7.0	7.0	3.0	0.0	0.0	0.0	0.0	0.0	18.0	13.0	330.0	45.0	88.0	0.0	0.0	5.0	10.0	0.0	0.0	1.0	3.0	0.0
OTU456506371	Bacteria; Proteobacteria; Alphaproteobacteria; Rhodospirillales; Rhodospirillaceae; uncultured	47.0	21.0	11.0	29.0	29.0	22.0	29.0	53.0	93.0	11.0	15.0	9.0	58.0	58.0	17.0	8.0	9.0	9.0	57.0	38.0	29.0	19.0	15.0	12.0	13.0	7.0	10.0	12.0	11.0	15.0	59.0	68.0	34.0	15.0	51.0	178.0	0.0	0.0	0.0	33.0	39.0	27.0
OTU157224106	Bacteria; Parcubacteria; uncultured bacterium; uncultured bacterium; uncultured bacterium; uncultured bacterium; uncultured bacterium	23.0	1.0	1.0	1.0	0.0	0.0	4.0	0.0	4.0	5.0	0.0	7.0	8.0	8.0	5.0	0.0	15.0	0.0	17.0	22.0	96.0	0.0	0.0	0.0	1.0	3.0	0.0	0.0	0.0	0.0	3.0	0.0	3.0	0.0	0.0	0.0	0.0	0.0	0.0	2.0	1.0	10.0
OTU641043606	Bacteria; Nitrospinae; MD2898-B26; uncultured bacterium; uncultured bacterium; uncultured bacterium; uncultured bacterium	0.0	0.0	0.0	0.0	4.0	0.0	28.0	59.0	165.0	1.0	7.0	2.0	63.0	45.0	23.0	0.0	11.0	6.0	481.0	432.0	813.0	0.0	2.0	4.0	0.0	0.0	0.0	0.0	0.0	0.0	0.0	0.0	0.0	0.0	0.0	8.0	23.0	0.0	0.0	190.0	332.0	325.0
OTU565884900	Bacteria; Firmicutes; Clostridia; Clostridiales; Peptococcaceae; Desulfitobacterium	135.0	266.0	349.0	111.0	93.0	55.0	38.0	62.0	88.0	32.0	19.0	69.0	3.0	6.0	16.0	8.0	1.0	59.0	9.0	246.0	12.0	9.0	0.0	0.0	0.0	4.0	142.0	0.0	0.0	5.0	74.0	0.0	6.0	164.0	4032.0	390.0	66.0	0.0	0.0	32.0	55.0	69.0
OTU597783521	Bacteria; Proteobacteria; Deltaproteobacteria; Bdellovibrionales; Bacteriovoracaceae; Deferrisoma; Ambiguous_taxa	0.0	3.0	0.0	0.0	0.0	1.0	3.0	0.0	0.0	0.0	0.0	0.0	22.0	3.0	6.0	7.0	7.0	1.0	11.0	24.0	60.0	0.0	0.0	7.0	0.0	0.0	1.0	0.0	0.0	3.0	0.0	16.0	0.0	0.0	0.0	0.0	0.0	0.0	0.0	0.0	0.0	11.0
OTU485188868	Archaea; Woesearchaeota (DHVEG-6)	0.0	6.0	2.0	0.0	0.0	0.0	61.0	10.0	13.0	3.0	7.0	0.0	8.0	19.0	6.0	14.0	3.0	1.0	24.0	71.0	41.0	1.0	2.0	50.0	0.0	0.0	0.0	0.0	16.0	22.0	23.0	0.0	0.0	0.0	0.0	0.0	0.0	54.0	0.0	12.0	66.0	27.0
OTU669281751	Bacteria; Planctomycetes; Phycisphaerae; Phycisphaerales; 08D2Z94 hypersaline microbial mat group	12.0	16.0	13.0	5.0	4.0	9.0	12.0	6.0	5.0	102.0	25.0	10.0	16.0	16.0	6.0	3.0	3.0	1.0	16.0	12.0	14.0	19.0	69.0	22.0	2.0	0.0	3.0	67.0	195.0	199.0	30.0	27.0	8.0	4.0	45.0	21.0	151.0	0.0	0.0	5.0	11.0	6.0
OTU922210777	Bacteria; Chlorobi; Chlorobia; Chlorobiales; SJA-28; uncultured bacterium; uncultured bacterium	2.0	0.0	0.0	0.0	1.0	1.0	0.0	0.0	0.0	3.0	0.0	0.0	0.0	0.0	0.0	9.0	4.0	3.0	0.0	0.0	1.0	2.0	3.0	0.0	256.0	33.0	119.0	8.0	0.0	0.0	3.0	5.0	0.0	0.0	0.0	0.0	0.0	0.0	0.0	0.0	0.0	0.0
OTU262910798	Unassigned	21.0	4.0	2.0	3.0	8.0	11.0	58.0	38.0	282.0	254.0	165.0	47.0	60.0	37.0	27.0	9.0	3.0	8.0	26.0	38.0	65.0	9.0	20.0	37.0	0.0	0.0	6.0	43.0	12.0	121.0	28.0	90.0	28.0	0.0	0.0	23.0	81.0	0.0	0.0	114.0	166.0	29.0
OTU787675083	Bacteria; Proteobacteria; Deltaproteobacteria; Desulfobacterales; Desulfobulbaceae; uncultured; uncultured bacterium	0.0	1.0	0.0	1.0	0.0	0.0	13.0	0.0	0.0	0.0	1.0	2.0	50.0	18.0	104.0	0.0	0.0	0.0	44.0	1.0	1.0	0.0	0.0	3.0	0.0	1.0	0.0	0.0	0.0	0.0	99.0	52.0	0.0	0.0	0.0	0.0	0.0	0.0	0.0	0.0	0.0	16.0
OTU340768034	Unassigned	22.0	0.0	0.0	1.0	0.0	0.0	0.0	0.0	0.0	0.0	4.0	0.0	0.0	1.0	0.0	8.0	11.0	5.0	0.0	0.0	0.0	0.0	0.0	20.0	5.0	3.0	2.0	38.0	0.0	0.0	16.0	6.0	0.0	0.0	14.0	1.0	0.0	0.0	0.0	2.0	1.0	0.0
OTU223208162	Bacteria; Acidobacteria; Subgroup 6; uncultured bacterium; uncultured bacterium; uncultured bacterium; uncultured bacterium	0.0	6.0	16.0	0.0	0.0	0.0	5.0	6.0	1.0	5.0	7.0	0.0	3.0	3.0	1.0	2.0	0.0	8.0	9.0	15.0	25.0	2.0	39.0	12.0	4.0	5.0	1.0	0.0	0.0	0.0	4.0	0.0	0.0	0.0	0.0	0.0	0.0	0.0	0.0	0.0	1.0	1.0
OTU123569147	Bacteria; Bacteroidetes; Flavobacteriia; Flavobacteriales; Flavobacteriaceae; Flavobacterium; uncultured bacterium	0.0	0.0	0.0	0.0	0.0	0.0	0.0	2.0	0.0	6.0	2.0	0.0	0.0	0.0	0.0	0.0	0.0	0.0	0.0	0.0	0.0	9.0	30.0	28.0	1.0	4.0	0.0	302.0	679.0	1843.0	0.0	0.0	0.0	0.0	0.0	0.0	0.0	0.0	0.0	2.0	0.0	0.0
OTU837020099	Bacteria; Proteobacteria; Betaproteobacteria; Rhodocyclales; Rhodocyclaceae	0.0	0.0	0.0	0.0	0.0	0.0	0.0	0.0	0.0	0.0	0.0	0.0	0.0	0.0	0.0	16.0	0.0	0.0	0.0	0.0	0.0	0.0	0.0	0.0	172.0	2.0	0.0	0.0	0.0	0.0	0.0	0.0	0.0	0.0	0.0	0.0	0.0	0.0	0.0	0.0	0.0	0.0
OTU440282260	Bacteria; Acidobacteria; Holophagae; Holophagales; Holophagaceae; uncultured	7.0	0.0	4.0	11.0	1.0	3.0	10.0	5.0	4.0	8.0	3.0	0.0	8.0	7.0	0.0	0.0	0.0	0.0	6.0	10.0	4.0	7.0	16.0	4.0	0.0	6.0	0.0	87.0	35.0	226.0	23.0	112.0	27.0	148.0	0.0	33.0	0.0	0.0	0.0	0.0	7.0	11.0
OTU187832958	Bacteria; Chlorobi; Chlorobia; Chlorobiales; OPB56	0.0	7.0	0.0	1.0	0.0	1.0	10.0	3.0	3.0	38.0	8.0	0.0	5.0	11.0	0.0	1.0	1.0	12.0	10.0	26.0	54.0	5.0	36.0	5.0	6.0	25.0	17.0	98.0	64.0	91.0	14.0	2.0	0.0	0.0	0.0	18.0	0.0	0.0	0.0	8.0	0.0	20.0
OTU185007043	Bacteria; Proteobacteria; Betaproteobacteria; Rhodocyclales; Rhodocyclaceae; uncultured	0.0	0.0	0.0	0.0	0.0	0.0	0.0	0.0	0.0	0.0	0.0	0.0	0.0	0.0	0.0	0.0	0.0	0.0	0.0	0.0	0.0	0.0	0.0	0.0	0.0	178.0	0.0	0.0	0.0	0.0	0.0	0.0	0.0	0.0	0.0	0.0	0.0	0.0	0.0	0.0	0.0	0.0
OTU448904893	Bacteria; Proteobacteria; Deltaproteobacteria; Desulfobacterales; Desulfobulbaceae; Desulfobulbus; uncultured bacterium	0.0	0.0	0.0	0.0	0.0	0.0	0.0	0.0	0.0	0.0	0.0	0.0	1.0	0.0	1.0	4.0	81.0	49.0	10.0	65.0	13.0	0.0	0.0	0.0	10.0	0.0	375.0	0.0	0.0	0.0	0.0	0.0	0.0	0.0	0.0	0.0	0.0	0.0	0.0	0.0	0.0	0.0
OTU928588944	Bacteria; Chloroflexi; Anaerolineae; Anaerolineales; Anaerolineaceae; uncultured; uncultured bacterium	8.0	1.0	1.0	0.0	0.0	0.0	20.0	7.0	0.0	14.0	6.0	5.0	11.0	1.0	3.0	33.0	0.0	32.0	0.0	19.0	31.0	0.0	7.0	9.0	12.0	117.0	31.0	15.0	33.0	27.0	0.0	0.0	0.0	0.0	0.0	0.0	0.0	0.0	0.0	1.0	9.0	13.0
OTU348126833	Bacteria; Planctomycetes; OM190; uncultured bacterium; uncultured bacterium; uncultured bacterium; uncultured bacterium	0.0	0.0	3.0	0.0	0.0	0.0	0.0	0.0	0.0	0.0	0.0	0.0	7.0	1.0	0.0	1.0	0.0	0.0	0.0	4.0	3.0	0.0	0.0	0.0	3.0	13.0	6.0	0.0	0.0	0.0	0.0	0.0	0.0	0.0	0.0	26.0	0.0	0.0	103.0	0.0	0.0	0.0
OTU45839710	Bacteria; Proteobacteria; Epsilonproteobacteria; Campylobacterales; Helicobacteraceae	1.0	0.0	1.0	0.0	6.0	14.0	65.0	75.0	2.0	0.0	0.0	0.0	16.0	13.0	84.0	0.0	0.0	29.0	1.0	0.0	68.0	0.0	0.0	0.0	0.0	0.0	0.0	0.0	0.0	0.0	0.0	0.0	0.0	0.0	0.0	0.0	0.0	0.0	0.0	0.0	1.0	19.0
OTU530962385	Bacteria; Proteobacteria; Betaproteobacteria; Neisseriales; Neisseriaceae; Vogesella; uncultured bacterium	3.0	447.0	1.0	1.0	0.0	0.0	0.0	0.0	0.0	0.0	2.0	0.0	0.0	64.0	0.0	0.0	0.0	0.0	0.0	0.0	0.0	0.0	172.0	0.0	0.0	0.0	0.0	1651.0	0.0	3.0	0.0	0.0	0.0	0.0	0.0	1.0	0.0	0.0	0.0	0.0	0.0	0.0
OTU222589608	Bacteria; Proteobacteria; Deltaproteobacteria; Desulfobacterales; Desulfobacteraceae; uncultured; uncultured organism	3.0	3.0	1.0	3.0	0.0	0.0	9.0	15.0	9.0	0.0	4.0	0.0	5.0	1.0	2.0	9.0	4.0	4.0	16.0	8.0	6.0	3.0	4.0	4.0	7.0	11.0	1.0	0.0	28.0	9.0	3.0	4.0	0.0	0.0	17.0	3.0	0.0	0.0	0.0	10.0	2.0	8.0
OTU611208244	Bacteria; Chloroflexi; Anaerolineae; Anaerolineales; Anaerolineaceae; uncultured; uncultured bacterium	0.0	0.0	0.0	0.0	0.0	2.0	0.0	0.0	0.0	3.0	0.0	0.0	0.0	0.0	0.0	1.0	8.0	3.0	4.0	11.0	6.0	0.0	0.0	4.0	28.0	11.0	72.0	10.0	10.0	10.0	0.0	0.0	0.0	0.0	0.0	11.0	0.0	0.0	0.0	1.0	1.0	1.0
OTU903620140	Bacteria; Proteobacteria; Deltaproteobacteria; Desulfobacterales; Desulfobacteraceae	9.0	61.0	35.0	143.0	86.0	177.0	85.0	47.0	55.0	121.0	128.0	92.0	81.0	79.0	34.0	47.0	70.0	42.0	169.0	102.0	82.0	115.0	217.0	233.0	6.0	8.0	20.0	109.0	154.0	282.0	418.0	288.0	174.0	0.0	147.0	54.0	3.0	24.0	85.0	63.0	70.0	16.0
OTU506752092	Bacteria; Parcubacteria; Candidatus Nomurabacteria; uncultured soil bacterium; uncultured soil bacterium; uncultured soil bacterium; uncultured soil bacterium	0.0	5.0	0.0	3.0	4.0	0.0	15.0	5.0	10.0	11.0	22.0	3.0	11.0	47.0	17.0	9.0	20.0	9.0	60.0	99.0	175.0	7.0	4.0	15.0	23.0	42.0	24.0	7.0	20.0	0.0	8.0	6.0	0.0	0.0	0.0	2.0	10.0	0.0	0.0	82.0	22.0	97.0
OTU366841917	Archaea; Euryarchaeota; Thermoplasmata; Thermoplasmatales; AMOS1A-4113-D04; uncultured archaeon; uncultured archaeon	9.0	19.0	8.0	0.0	1.0	3.0	63.0	32.0	172.0	46.0	32.0	51.0	275.0	69.0	91.0	1.0	3.0	9.0	90.0	130.0	91.0	1.0	0.0	0.0	0.0	0.0	0.0	0.0	0.0	0.0	10.0	12.0	0.0	0.0	0.0	2.0	0.0	0.0	0.0	62.0	96.0	13.0
OTU612308513	Bacteria; Fibrobacteres; Chitinivibrionia; possible order 07; uncultured bacterium; uncultured bacterium; uncultured bacterium	0.0	2.0	0.0	1.0	0.0	0.0	23.0	31.0	11.0	10.0	1.0	9.0	51.0	38.0	42.0	0.0	1.0	4.0	63.0	96.0	171.0	2.0	2.0	5.0	0.0	1.0	0.0	0.0	0.0	19.0	3.0	0.0	0.0	0.0	0.0	0.0	0.0	0.0	0.0	32.0	11.0	11.0
OTU920339638	Bacteria; Spirochaetae; Spirochaetes; Spirochaetales; Spirochaetaceae; Treponema	6.0	0.0	0.0	4.0	1.0	0.0	2.0	11.0	14.0	0.0	3.0	0.0	0.0	0.0	0.0	0.0	0.0	0.0	0.0	4.0	0.0	0.0	0.0	0.0	0.0	0.0	0.0	0.0	0.0	0.0	0.0	0.0	0.0	0.0	0.0	0.0	0.0	0.0	0.0	45.0	40.0	49.0
OTU448837291	Unassigned	2.0	1.0	1.0	2.0	1.0	0.0	0.0	10.0	3.0	5.0	11.0	5.0	3.0	4.0	5.0	1.0	2.0	1.0	3.0	0.0	2.0	12.0	4.0	31.0	1.0	1.0	0.0	1.0	7.0	19.0	6.0	1.0	5.0	0.0	0.0	0.0	61.0	0.0	0.0	11.0	11.0	3.0
OTU265255067	Unassigned	8.0	2.0	1.0	6.0	0.0	0.0	1.0	1.0	0.0	82.0	2.0	5.0	0.0	0.0	2.0	0.0	0.0	0.0	8.0	0.0	1.0	1.0	17.0	17.0	3.0	0.0	0.0	64.0	30.0	11.0	39.0	0.0	0.0	0.0	0.0	0.0	0.0	0.0	0.0	3.0	0.0	0.0
OTU745289385	Bacteria; Parcubacteria; Candidatus Falkowbacteria; uncultured bacterium; uncultured bacterium; uncultured bacterium; uncultured bacterium	2.0	0.0	0.0	0.0	0.0	0.0	0.0	0.0	0.0	3.0	13.0	0.0	0.0	17.0	0.0	0.0	8.0	0.0	1355.0	0.0	0.0	0.0	0.0	5.0	0.0	0.0	0.0	0.0	7.0	0.0	2.0	0.0	0.0	0.0	0.0	0.0	0.0	0.0	0.0	3.0	0.0	9.0
OTU446979591	Bacteria; Chloroflexi; SBR2076	0.0	0.0	0.0	0.0	0.0	0.0	0.0	0.0	0.0	0.0	0.0	0.0	0.0	0.0	0.0	24.0	13.0	63.0	0.0	0.0	1.0	0.0	0.0	0.0	4.0	145.0	0.0	0.0	0.0	0.0	0.0	0.0	0.0	0.0	0.0	0.0	0.0	0.0	0.0	0.0	0.0	0.0
OTU547395752	Bacteria; Firmicutes; Clostridia; Clostridiales; Peptococcaceae; Desulfurispora	0.0	8.0	0.0	0.0	0.0	0.0	0.0	0.0	0.0	0.0	0.0	0.0	0.0	0.0	0.0	0.0	0.0	0.0	0.0	0.0	0.0	6.0	0.0	0.0	61.0	0.0	3.0	0.0	0.0	0.0	38.0	0.0	0.0	0.0	72.0	0.0	0.0	0.0	0.0	0.0	0.0	0.0
OTU705557228	Bacteria; Proteobacteria; Deltaproteobacteria; Desulfobacterales; Desulfobulbaceae	0.0	0.0	0.0	0.0	0.0	0.0	0.0	0.0	0.0	0.0	0.0	0.0	0.0	3.0	0.0	10.0	13.0	18.0	0.0	0.0	0.0	0.0	0.0	5.0	0.0	157.0	0.0	0.0	0.0	0.0	0.0	0.0	0.0	0.0	0.0	0.0	0.0	0.0	0.0	0.0	0.0	10.0
OTU820612878	Bacteria; Proteobacteria; Epsilonproteobacteria; Campylobacterales; Campylobacteraceae; Arcobacter	0.0	0.0	0.0	0.0	2.0	4.0	3.0	0.0	0.0	21.0	21.0	1.0	26.0	108.0	6.0	0.0	0.0	0.0	2.0	1.0	0.0	0.0	0.0	0.0	0.0	0.0	0.0	40.0	0.0	15.0	0.0	0.0	0.0	0.0	0.0	11.0	45.0	0.0	0.0	7.0	4.0	7.0
OTU820636697	Bacteria; Proteobacteria; Alphaproteobacteria; Rhodospirillales; Rhodospirillaceae; Elstera	1.0	0.0	5.0	3.0	1.0	4.0	0.0	0.0	0.0	13.0	0.0	3.0	0.0	4.0	0.0	0.0	0.0	0.0	0.0	0.0	0.0	7.0	30.0	28.0	0.0	0.0	0.0	11.0	146.0	13.0	0.0	0.0	0.0	0.0	0.0	0.0	0.0	0.0	0.0	0.0	0.0	0.0
OTU210467249	Bacteria; Proteobacteria; Betaproteobacteria; Hydrogenophilales; Hydrogenophilaceae; Sulfuriferula; uncultured beta proteobacterium	2.0	9.0	2.0	12.0	14.0	12.0	0.0	0.0	0.0	239.0	175.0	1.0	0.0	0.0	1.0	0.0	0.0	0.0	0.0	0.0	0.0	0.0	0.0	0.0	0.0	2.0	8.0	0.0	0.0	7.0	0.0	0.0	1.0	0.0	75.0	5.0	0.0	0.0	1.0	0.0	0.0	0.0
OTU72373754	Bacteria; Proteobacteria; Deltaproteobacteria; Myxococcales; PS-B29	26.0	8.0	7.0	2.0	4.0	4.0	0.0	0.0	0.0	4.0	23.0	16.0	3.0	35.0	3.0	6.0	0.0	7.0	9.0	0.0	1.0	20.0	29.0	47.0	1.0	3.0	5.0	0.0	17.0	5.0	37.0	30.0	0.0	0.0	18.0	31.0	169.0	194.0	44.0	3.0	2.0	6.0
OTU382644043	Bacteria; Firmicutes; Bacilli; Bacillales; Family XI; Gemella; uncultured bacterium	0.0	0.0	0.0	0.0	0.0	0.0	0.0	0.0	0.0	0.0	0.0	0.0	2.0	0.0	0.0	0.0	0.0	0.0	0.0	0.0	0.0	0.0	0.0	0.0	0.0	0.0	0.0	0.0	0.0	0.0	0.0	0.0	0.0	0.0	0.0	0.0	0.0	0.0	189.0	0.0	0.0	0.0
OTU261799662	Bacteria; Spirochaetae; Spirochaetes; Spirochaetales; Spirochaetaceae; uncultured; Ambiguous_taxa	0.0	3.0	1.0	64.0	58.0	73.0	8.0	5.0	4.0	0.0	7.0	0.0	4.0	1.0	1.0	23.0	2.0	11.0	26.0	5.0	25.0	11.0	11.0	5.0	3.0	0.0	3.0	2.0	19.0	4.0	4.0	0.0	0.0	0.0	4.0	0.0	0.0	0.0	4.0	3.0	2.0	1.0
OTU479059879	Bacteria; Proteobacteria; Deltaproteobacteria; Syntrophobacterales; Syntrophobacteraceae; Desulfovirga; uncultured bacterium	5.0	4.0	8.0	3.0	1.0	10.0	3.0	4.0	15.0	2.0	3.0	0.0	7.0	4.0	0.0	0.0	0.0	0.0	17.0	6.0	16.0	0.0	15.0	8.0	2.0	2.0	4.0	27.0	22.0	11.0	2.0	0.0	0.0	0.0	0.0	0.0	0.0	0.0	0.0	10.0	3.0	0.0
OTU909713141	Bacteria; Proteobacteria; Deltaproteobacteria; FW113; uncultured organism; uncultured organism; uncultured organism	5.0	10.0	5.0	0.0	0.0	2.0	6.0	1.0	7.0	0.0	0.0	0.0	2.0	0.0	5.0	3.0	2.0	2.0	4.0	6.0	7.0	14.0	0.0	4.0	3.0	2.0	8.0	0.0	0.0	12.0	1.0	0.0	0.0	0.0	3.0	21.0	0.0	0.0	0.0	2.0	1.0	10.0
OTU644636326	Bacteria; Proteobacteria; Gammaproteobacteria; Pseudomonadales; Pseudomonadaceae; Pseudomonas; Ambiguous_taxa	78.0	0.0	354.0	192.0	20.0	481.0	0.0	1.0	0.0	40.0	23.0	48.0	0.0	0.0	0.0	0.0	0.0	0.0	0.0	0.0	0.0	25.0	249.0	201.0	1.0	6.0	7.0	31.0	20.0	0.0	0.0	1.0	0.0	0.0	0.0	0.0	0.0	0.0	0.0	0.0	0.0	0.0
OTU40098333	Bacteria; Proteobacteria; Alphaproteobacteria; Rhodospirillales; Rhodospirillaceae; uncultured	7.0	10.0	22.0	13.0	24.0	17.0	2.0	8.0	13.0	0.0	2.0	0.0	0.0	0.0	0.0	0.0	0.0	0.0	9.0	25.0	15.0	5.0	0.0	13.0	0.0	0.0	9.0	1.0	0.0	0.0	1.0	5.0	0.0	0.0	96.0	47.0	0.0	0.0	0.0	0.0	2.0	0.0
OTU549337339	Bacteria; Proteobacteria; Deltaproteobacteria; Desulfarculales; Desulfarculaceae; Desulfatiglans; uncultured bacterium	0.0	1.0	2.0	7.0	1.0	0.0	3.0	2.0	6.0	2.0	5.0	4.0	2.0	0.0	1.0	0.0	3.0	2.0	3.0	0.0	0.0	0.0	14.0	13.0	5.0	2.0	10.0	0.0	24.0	0.0	0.0	14.0	0.0	0.0	13.0	0.0	28.0	0.0	0.0	0.0	16.0	1.0
OTU649325736	Unassigned	0.0	0.0	0.0	0.0	0.0	0.0	12.0	43.0	19.0	0.0	0.0	0.0	11.0	0.0	1.0	0.0	0.0	0.0	44.0	19.0	29.0	0.0	0.0	0.0	0.0	0.0	0.0	0.0	0.0	0.0	0.0	0.0	0.0	0.0	0.0	0.0	0.0	0.0	0.0	3.0	2.0	0.0
OTU275177070	Bacteria; Nitrospinae; Belgica2005-10-ZG-3; uncultured bacterium; uncultured bacterium; uncultured bacterium; uncultured bacterium	0.0	0.0	0.0	0.0	0.0	0.0	0.0	0.0	0.0	0.0	0.0	0.0	284.0	11.0	4.0	0.0	0.0	0.0	0.0	0.0	0.0	0.0	0.0	0.0	0.0	0.0	0.0	0.0	0.0	0.0	0.0	0.0	0.0	0.0	0.0	0.0	0.0	0.0	0.0	0.0	0.0	0.0
OTU287609935	Unassigned	5.0	4.0	9.0	2.0	2.0	4.0	0.0	0.0	4.0	91.0	15.0	17.0	1.0	3.0	1.0	9.0	4.0	13.0	7.0	0.0	6.0	12.0	17.0	34.0	5.0	3.0	3.0	37.0	32.0	41.0	40.0	26.0	3.0	0.0	0.0	0.0	36.0	16.0	0.0	1.0	15.0	3.0
OTU102287793	Bacteria; Actinobacteria; Thermoleophilia; Gaiellales; uncultured; Ambiguous_taxa; Ambiguous_taxa	0.0	0.0	4.0	0.0	0.0	1.0	1.0	0.0	0.0	2.0	0.0	1.0	0.0	1.0	0.0	26.0	89.0	46.0	0.0	5.0	0.0	5.0	6.0	0.0	27.0	63.0	8.0	0.0	0.0	0.0	25.0	8.0	0.0	0.0	0.0	33.0	0.0	0.0	0.0	0.0	0.0	4.0
OTU269007818	Bacteria; Proteobacteria; Deltaproteobacteria; Desulfobacterales; Desulfobulbaceae	65.0	22.0	53.0	4.0	2.0	1.0	10.0	9.0	18.0	17.0	8.0	23.0	1.0	2.0	1.0	3.0	0.0	8.0	5.0	18.0	5.0	238.0	171.0	170.0	2.0	11.0	4.0	776.0	832.0	654.0	47.0	7.0	0.0	0.0	48.0	0.0	86.0	125.0	0.0	4.0	4.0	2.0
OTU235813196	Bacteria; Lentisphaerae; Lentisphaeria; Victivallales; PRD18C08; uncultured bacterium; uncultured bacterium	0.0	4.0	4.0	0.0	0.0	0.0	3.0	0.0	0.0	0.0	0.0	0.0	3.0	0.0	0.0	0.0	5.0	23.0	0.0	0.0	2.0	99.0	0.0	0.0	34.0	0.0	32.0	0.0	0.0	0.0	301.0	10.0	0.0	0.0	0.0	0.0	0.0	0.0	0.0	0.0	0.0	7.0
OTU53489926	Bacteria; Fibrobacteres; Chitinivibrionia; possible order 07; Ambiguous_taxa; Ambiguous_taxa; Ambiguous_taxa	0.0	1.0	0.0	1.0	1.0	0.0	17.0	14.0	14.0	8.0	2.0	0.0	11.0	20.0	14.0	9.0	0.0	23.0	5.0	30.0	45.0	14.0	10.0	5.0	5.0	18.0	7.0	2.0	0.0	5.0	3.0	8.0	0.0	0.0	0.0	21.0	0.0	0.0	0.0	24.0	46.0	11.0
OTU962006246	Bacteria; Proteobacteria; Deltaproteobacteria; Desulfobacterales; Desulfobulbaceae; Desulfobulbus	0.0	0.0	2.0	0.0	0.0	8.0	1.0	0.0	0.0	0.0	0.0	0.0	0.0	2.0	0.0	51.0	2.0	4.0	49.0	11.0	0.0	0.0	0.0	0.0	2.0	52.0	0.0	0.0	0.0	0.0	14.0	0.0	0.0	0.0	0.0	0.0	0.0	0.0	0.0	0.0	0.0	31.0
OTU478676620	Unassigned	0.0	0.0	0.0	0.0	0.0	0.0	0.0	2.0	4.0	0.0	0.0	0.0	0.0	1.0	0.0	0.0	2.0	2.0	29.0	53.0	56.0	0.0	0.0	0.0	0.0	0.0	0.0	0.0	0.0	0.0	0.0	0.0	0.0	0.0	0.0	1.0	0.0	0.0	0.0	2.0	0.0	0.0
OTU392376110	Bacteria; Parcubacteria; Candidatus Falkowbacteria; uncultured bacterium; uncultured bacterium; uncultured bacterium; uncultured bacterium	1.0	5.0	0.0	57.0	0.0	0.0	0.0	0.0	0.0	193.0	68.0	0.0	0.0	0.0	0.0	0.0	0.0	0.0	6.0	0.0	0.0	0.0	0.0	2.0	0.0	2.0	0.0	0.0	0.0	0.0	0.0	4.0	1.0	24.0	0.0	0.0	62.0	0.0	0.0	8.0	0.0	8.0
OTU613525092	Bacteria; Proteobacteria; Gammaproteobacteria; Chromatiales; Chromatiaceae; Rheinheimera; uncultured bacterium	57.0	0.0	0.0	16.0	0.0	0.0	0.0	0.0	0.0	23.0	0.0	0.0	0.0	1.0	0.0	0.0	0.0	0.0	0.0	2.0	0.0	14.0	56.0	83.0	0.0	36.0	0.0	1080.0	0.0	0.0	0.0	0.0	0.0	0.0	0.0	0.0	0.0	0.0	0.0	0.0	0.0	5.0
OTU9074389	Bacteria; Proteobacteria; Deltaproteobacteria; Desulfobacterales; Desulfobulbaceae; Desulfobulbus	4.0	0.0	0.0	6.0	4.0	21.0	15.0	20.0	9.0	8.0	5.0	4.0	3.0	1.0	0.0	1.0	1.0	3.0	11.0	4.0	2.0	1.0	12.0	34.0	0.0	8.0	2.0	4.0	9.0	22.0	4.0	8.0	18.0	0.0	33.0	6.0	0.0	0.0	0.0	57.0	92.0	32.0
OTU496633724	Bacteria; Gracilibacteria; uncultured bacterium; uncultured bacterium; uncultured bacterium; uncultured bacterium; uncultured bacterium	0.0	8.0	22.0	0.0	1.0	0.0	14.0	111.0	161.0	0.0	0.0	1.0	17.0	28.0	12.0	2.0	0.0	5.0	272.0	613.0	490.0	0.0	0.0	0.0	2.0	28.0	34.0	0.0	0.0	6.0	9.0	12.0	0.0	0.0	185.0	838.0	0.0	0.0	0.0	2.0	1.0	7.0
OTU144727759	Unassigned	2.0	0.0	0.0	3.0	0.0	0.0	0.0	0.0	0.0	7.0	0.0	5.0	0.0	4.0	0.0	0.0	0.0	0.0	8.0	0.0	0.0	14.0	5.0	3.0	2.0	0.0	0.0	0.0	23.0	9.0	16.0	10.0	0.0	0.0	0.0	0.0	69.0	0.0	0.0	0.0	2.0	3.0
OTU695574760	Bacteria; Verrucomicrobia; WCHB1-41; uncultured bacterium; uncultured bacterium; uncultured bacterium; uncultured bacterium	7.0	0.0	1.0	2.0	0.0	0.0	0.0	2.0	10.0	4.0	4.0	4.0	2.0	0.0	0.0	1.0	1.0	0.0	4.0	1.0	0.0	12.0	8.0	3.0	0.0	0.0	0.0	28.0	34.0	15.0	15.0	0.0	0.0	30.0	0.0	0.0	41.0	0.0	0.0	0.0	0.0	0.0
OTU298869626	Bacteria; Chloroflexi; Anaerolineae; Anaerolineales; Anaerolineaceae; uncultured; uncultured bacterium	0.0	0.0	0.0	0.0	0.0	1.0	0.0	1.0	2.0	5.0	2.0	8.0	0.0	0.0	0.0	0.0	10.0	24.0	1.0	0.0	0.0	0.0	9.0	10.0	10.0	0.0	74.0	12.0	27.0	20.0	14.0	0.0	0.0	0.0	0.0	0.0	7.0	0.0	0.0	0.0	4.0	0.0
OTU216653990	Bacteria; Parcubacteria; Candidatus Falkowbacteria; uncultured bacterium; uncultured bacterium; uncultured bacterium; uncultured bacterium	1.0	0.0	0.0	1.0	1.0	0.0	0.0	0.0	0.0	1.0	0.0	0.0	0.0	0.0	0.0	0.0	0.0	0.0	12.0	3.0	0.0	0.0	0.0	0.0	0.0	0.0	0.0	63.0	0.0	70.0	0.0	0.0	0.0	0.0	0.0	0.0	0.0	0.0	0.0	2.0	2.0	0.0
OTU702414598	Unassigned	1.0	7.0	1.0	0.0	1.0	0.0	52.0	14.0	16.0	0.0	4.0	0.0	6.0	0.0	3.0	5.0	1.0	10.0	2.0	11.0	5.0	2.0	14.0	12.0	3.0	0.0	5.0	0.0	11.0	23.0	1.0	0.0	0.0	0.0	0.0	1.0	0.0	48.0	0.0	31.0	23.0	0.0
OTU795551955	Unassigned	0.0	0.0	0.0	0.0	3.0	0.0	17.0	61.0	83.0	4.0	6.0	6.0	4.0	3.0	5.0	2.0	1.0	1.0	27.0	153.0	69.0	4.0	0.0	3.0	0.0	2.0	0.0	0.0	16.0	0.0	0.0	0.0	0.0	0.0	0.0	7.0	30.0	0.0	0.0	73.0	25.0	26.0
OTU28343197	Bacteria; Nitrospinae; MD2898-B26; uncultured bacterium; uncultured bacterium; uncultured bacterium; uncultured bacterium	88.0	15.0	16.0	1.0	2.0	1.0	51.0	35.0	48.0	12.0	51.0	20.0	97.0	26.0	79.0	0.0	5.0	0.0	194.0	200.0	67.0	6.0	31.0	36.0	0.0	0.0	2.0	49.0	0.0	0.0	73.0	8.0	6.0	1.0	28.0	20.0	0.0	0.0	0.0	177.0	323.0	38.0
OTU321580503	Bacteria; Omnitrophica; Ambiguous_taxa; Ambiguous_taxa; Ambiguous_taxa; Ambiguous_taxa; Ambiguous_taxa	0.0	0.0	0.0	1.0	0.0	1.0	32.0	7.0	44.0	244.0	217.0	82.0	73.0	46.0	97.0	0.0	6.0	1.0	156.0	6.0	18.0	0.0	0.0	16.0	0.0	0.0	8.0	0.0	36.0	5.0	69.0	97.0	42.0	0.0	127.0	1.0	0.0	0.0	0.0	30.0	91.0	4.0
OTU896656485	Bacteria; Nitrospirae; Nitrospira; Nitrospirales; BMS9AB35; uncultured bacterium; uncultured bacterium	0.0	2.0	0.0	0.0	29.0	0.0	3.0	83.0	134.0	0.0	8.0	0.0	0.0	15.0	66.0	2.0	0.0	58.0	0.0	43.0	0.0	0.0	0.0	0.0	0.0	0.0	0.0	0.0	0.0	0.0	55.0	43.0	0.0	0.0	0.0	57.0	0.0	0.0	0.0	1915.0	280.0	0.0
OTU325404665	Unassigned	3.0	4.0	5.0	0.0	1.0	0.0	11.0	3.0	5.0	0.0	1.0	0.0	3.0	2.0	0.0	13.0	32.0	29.0	2.0	8.0	8.0	3.0	4.0	6.0	12.0	37.0	304.0	20.0	6.0	31.0	5.0	0.0	0.0	0.0	0.0	0.0	0.0	0.0	0.0	30.0	25.0	38.0
OTU980815247	Bacteria; RBG-1 (Zixibacteria); uncultured bacterium; uncultured bacterium; uncultured bacterium; uncultured bacterium; uncultured bacterium	0.0	0.0	2.0	0.0	0.0	0.0	7.0	13.0	6.0	1.0	4.0	5.0	5.0	17.0	15.0	6.0	6.0	3.0	34.0	22.0	46.0	0.0	3.0	3.0	0.0	0.0	1.0	0.0	0.0	36.0	1.0	0.0	0.0	0.0	0.0	1.0	0.0	0.0	0.0	3.0	13.0	4.0
OTU122975183	Unassigned	0.0	0.0	0.0	0.0	0.0	0.0	0.0	0.0	0.0	0.0	0.0	0.0	0.0	0.0	0.0	97.0	1.0	0.0	0.0	0.0	0.0	0.0	0.0	0.0	1072.0	68.0	0.0	0.0	0.0	0.0	8.0	5.0	0.0	0.0	0.0	0.0	0.0	0.0	0.0	0.0	0.0	0.0
OTU68238094	Bacteria; Bacteroidetes; Sphingobacteriia; Sphingobacteriales; Lentimicrobiaceae	0.0	1.0	0.0	0.0	0.0	0.0	1.0	0.0	1.0	0.0	1.0	0.0	8.0	7.0	0.0	8.0	12.0	16.0	0.0	0.0	0.0	4.0	28.0	0.0	175.0	64.0	276.0	0.0	0.0	1.0	3.0	0.0	0.0	0.0	0.0	0.0	0.0	0.0	0.0	0.0	3.0	0.0
OTU167673798	Bacteria; Firmicutes; Clostridia; Clostridiales; Peptococcaceae; Desulfosporosinus	2.0	2.0	3.0	0.0	0.0	0.0	0.0	13.0	6.0	0.0	1.0	11.0	2.0	0.0	0.0	16.0	5.0	2.0	0.0	0.0	17.0	25.0	0.0	0.0	0.0	0.0	9.0	0.0	33.0	11.0	19.0	0.0	19.0	0.0	207.0	153.0	0.0	0.0	0.0	6.0	1.0	5.0
OTU403372912	Unassigned	0.0	0.0	1.0	11.0	0.0	0.0	3.0	0.0	6.0	0.0	0.0	1.0	11.0	5.0	9.0	0.0	2.0	0.0	16.0	12.0	30.0	0.0	0.0	0.0	0.0	1.0	0.0	24.0	0.0	68.0	2.0	0.0	0.0	0.0	0.0	0.0	0.0	0.0	0.0	0.0	1.0	3.0
OTU641068801	Bacteria; Chloroflexi; Anaerolineae; Anaerolineales; Anaerolineaceae; Anaerolinea	0.0	4.0	12.0	0.0	1.0	0.0	0.0	1.0	0.0	0.0	1.0	0.0	0.0	1.0	0.0	10.0	11.0	0.0	0.0	0.0	4.0	14.0	4.0	9.0	17.0	61.0	79.0	5.0	0.0	0.0	2.0	0.0	0.0	0.0	0.0	0.0	0.0	0.0	0.0	2.0	1.0	0.0
OTU375324207	Bacteria; Parcubacteria; Candidatus Kuenenbacteria; uncultured bacterium; uncultured bacterium; uncultured bacterium; uncultured bacterium	0.0	3.0	2.0	2.0	0.0	0.0	0.0	3.0	0.0	4.0	0.0	0.0	1.0	4.0	1.0	1.0	3.0	2.0	4.0	50.0	16.0	3.0	2.0	0.0	0.0	0.0	0.0	0.0	5.0	0.0	1.0	0.0	1.0	0.0	0.0	0.0	68.0	0.0	11.0	1.0	0.0	4.0
OTU772825413	Bacteria; Proteobacteria; Deltaproteobacteria; Syntrophobacterales; Syntrophaceae; Desulfomonile	2.0	0.0	1.0	0.0	0.0	0.0	0.0	0.0	0.0	0.0	2.0	0.0	7.0	40.0	0.0	2.0	35.0	11.0	0.0	0.0	0.0	15.0	0.0	7.0	11.0	48.0	13.0	0.0	1.0	0.0	0.0	2.0	0.0	0.0	0.0	0.0	0.0	0.0	0.0	0.0	0.0	3.0
OTU438196165	Bacteria; Nitrospirae; Nitrospira; Nitrospirales; FW13	0.0	0.0	0.0	0.0	0.0	0.0	0.0	0.0	0.0	0.0	0.0	0.0	0.0	0.0	0.0	14.0	26.0	13.0	0.0	0.0	0.0	0.0	0.0	0.0	38.0	49.0	12.0	0.0	0.0	0.0	0.0	0.0	0.0	0.0	0.0	0.0	0.0	0.0	0.0	0.0	0.0	0.0
OTU209180327	Unassigned	0.0	0.0	1.0	0.0	0.0	1.0	0.0	0.0	1.0	7.0	17.0	5.0	25.0	0.0	69.0	0.0	0.0	0.0	0.0	52.0	0.0	0.0	10.0	3.0	0.0	0.0	0.0	5.0	28.0	0.0	0.0	0.0	0.0	0.0	1.0	1.0	0.0	0.0	0.0	25.0	1.0	0.0
OTU849613254	Bacteria; Bacteroidetes; Sphingobacteriia; Sphingobacteriales; Lentimicrobiaceae	0.0	0.0	0.0	0.0	0.0	0.0	1.0	0.0	0.0	0.0	1.0	0.0	0.0	0.0	0.0	29.0	13.0	28.0	0.0	0.0	0.0	0.0	0.0	0.0	22.0	103.0	23.0	11.0	15.0	0.0	3.0	0.0	0.0	0.0	0.0	0.0	0.0	0.0	0.0	0.0	0.0	1.0
OTU751555080	Bacteria; Spirochaetae; Spirochaetes; Spirochaetales; Leptospiraceae; uncultured; uncultured organism	4.0	0.0	0.0	2.0	0.0	0.0	0.0	0.0	0.0	1.0	1.0	0.0	4.0	0.0	0.0	0.0	0.0	0.0	0.0	0.0	0.0	3.0	0.0	2.0	0.0	0.0	3.0	7.0	4.0	38.0	0.0	0.0	0.0	0.0	38.0	53.0	0.0	0.0	0.0	0.0	0.0	0.0
OTU394240472	Bacteria; Chloroflexi; SHA-26; uncultured bacterium; uncultured bacterium; uncultured bacterium; uncultured bacterium	0.0	5.0	5.0	1.0	7.0	0.0	1.0	0.0	3.0	4.0	5.0	2.0	3.0	7.0	1.0	1.0	0.0	7.0	6.0	6.0	3.0	7.0	7.0	13.0	0.0	3.0	3.0	6.0	21.0	25.0	13.0	6.0	18.0	0.0	0.0	0.0	52.0	109.0	162.0	4.0	4.0	6.0
OTU414655363	Bacteria; Proteobacteria; Deltaproteobacteria; Desulfovibrionales; Desulfovibrionaceae; Desulfovibrio; Ambiguous_taxa	0.0	2.0	4.0	0.0	0.0	0.0	7.0	1.0	23.0	0.0	0.0	0.0	0.0	0.0	5.0	0.0	0.0	0.0	1.0	4.0	3.0	51.0	7.0	62.0	0.0	0.0	0.0	0.0	0.0	22.0	0.0	0.0	17.0	0.0	0.0	1.0	0.0	0.0	0.0	0.0	0.0	0.0
OTU942812262	Bacteria; Proteobacteria; Deltaproteobacteria; Desulfobacterales; Desulfobulbaceae; [Desulfobacterium] catecholicum group; uncultured bacterium	10.0	19.0	22.0	13.0	0.0	0.0	35.0	31.0	27.0	14.0	14.0	5.0	6.0	15.0	8.0	3.0	2.0	0.0	0.0	12.0	6.0	32.0	10.0	13.0	1.0	11.0	5.0	62.0	104.0	180.0	358.0	21.0	4.0	0.0	59.0	15.0	37.0	0.0	0.0	3.0	9.0	8.0
OTU209152125	Bacteria; Proteobacteria; Betaproteobacteria; Rhodocyclales; Rhodocyclaceae; Azoarcus	0.0	0.0	0.0	0.0	0.0	1.0	0.0	0.0	0.0	0.0	0.0	0.0	0.0	0.0	0.0	9.0	2.0	9.0	0.0	5.0	0.0	0.0	0.0	0.0	65.0	97.0	69.0	0.0	0.0	0.0	0.0	0.0	0.0	0.0	0.0	0.0	0.0	0.0	0.0	0.0	0.0	0.0
OTU584438258	Unassigned	0.0	0.0	0.0	0.0	0.0	0.0	38.0	8.0	16.0	0.0	0.0	0.0	0.0	16.0	0.0	0.0	3.0	0.0	73.0	24.0	108.0	0.0	0.0	4.0	0.0	0.0	0.0	0.0	11.0	0.0	0.0	0.0	0.0	0.0	0.0	0.0	0.0	0.0	0.0	0.0	38.0	44.0
OTU991586428	Bacteria; FCPU426; uncultured bacterium; uncultured bacterium; uncultured bacterium; uncultured bacterium; uncultured bacterium	32.0	19.0	1.0	2.0	5.0	11.0	21.0	0.0	0.0	0.0	22.0	79.0	1.0	0.0	0.0	0.0	0.0	0.0	6.0	0.0	1.0	1.0	7.0	58.0	0.0	0.0	0.0	0.0	5.0	196.0	50.0	25.0	19.0	0.0	0.0	1.0	0.0	21.0	0.0	51.0	41.0	0.0
OTU674799519	Bacteria; Acidobacteria; Holophagae; Holophagales; Holophagaceae; uncultured	369.0	20.0	63.0	45.0	28.0	0.0	2.0	27.0	55.0	6.0	0.0	0.0	0.0	0.0	0.0	0.0	0.0	0.0	0.0	0.0	0.0	77.0	9.0	0.0	0.0	0.0	0.0	0.0	18.0	0.0	23.0	0.0	0.0	0.0	0.0	0.0	0.0	0.0	0.0	0.0	3.0	0.0
OTU603273521	Bacteria; Gracilibacteria; uncultured bacterium; uncultured bacterium; uncultured bacterium; uncultured bacterium; uncultured bacterium	0.0	0.0	0.0	0.0	3.0	1.0	0.0	6.0	6.0	7.0	6.0	3.0	0.0	0.0	0.0	2.0	13.0	0.0	3.0	0.0	1.0	0.0	0.0	0.0	1.0	7.0	1.0	5.0	0.0	4.0	0.0	0.0	0.0	0.0	0.0	3.0	0.0	0.0	0.0	64.0	83.0	85.0
OTU615547824	Bacteria; Lentisphaerae; Lentisphaeria; Victivallales; pLW-89; uncultured organism; uncultured organism	0.0	0.0	0.0	7.0	0.0	2.0	15.0	9.0	1.0	20.0	2.0	4.0	3.0	0.0	0.0	0.0	0.0	0.0	9.0	14.0	45.0	2.0	8.0	0.0	0.0	0.0	1.0	12.0	10.0	0.0	27.0	15.0	0.0	0.0	0.0	1.0	33.0	0.0	0.0	18.0	5.0	1.0
OTU600413554	Unassigned	0.0	0.0	0.0	0.0	0.0	0.0	4.0	10.0	1.0	4.0	10.0	0.0	1.0	0.0	1.0	0.0	0.0	0.0	4.0	26.0	11.0	0.0	0.0	0.0	0.0	0.0	0.0	80.0	22.0	15.0	2.0	0.0	0.0	0.0	0.0	0.0	0.0	74.0	0.0	0.0	0.0	3.0
OTU171769295	Bacteria; Fusobacteria; Fusobacteriia; Fusobacteriales; Leptotrichiaceae; uncultured; uncultured bacterium	0.0	0.0	0.0	0.0	0.0	0.0	0.0	0.0	0.0	0.0	0.0	0.0	0.0	4.0	0.0	0.0	0.0	0.0	4.0	0.0	0.0	17.0	0.0	2.0	0.0	0.0	0.0	0.0	0.0	0.0	52.0	0.0	0.0	0.0	0.0	0.0	0.0	192.0	0.0	0.0	0.0	25.0
OTU791207266	Bacteria; Deferribacteres; Deferribacteres Incertae Sedis; Unknown Order; Unknown Family; Caldithrix; uncultured bacterium	9.0	3.0	2.0	3.0	0.0	1.0	0.0	7.0	3.0	7.0	1.0	0.0	3.0	3.0	6.0	3.0	5.0	8.0	1.0	0.0	0.0	1.0	16.0	6.0	8.0	9.0	4.0	26.0	2.0	30.0	15.0	0.0	0.0	0.0	0.0	0.0	0.0	0.0	0.0	3.0	1.0	0.0
OTU803667242	Bacteria; Chloroflexi; Anaerolineae; Anaerolineales; Anaerolineaceae; uncultured; uncultured organism	0.0	0.0	0.0	0.0	0.0	0.0	0.0	0.0	0.0	0.0	0.0	0.0	0.0	0.0	0.0	0.0	2.0	0.0	0.0	0.0	0.0	0.0	0.0	0.0	0.0	0.0	154.0	0.0	0.0	0.0	0.0	0.0	0.0	0.0	0.0	0.0	0.0	0.0	0.0	0.0	0.0	0.0
OTU979339915	Unassigned	0.0	0.0	0.0	0.0	0.0	0.0	0.0	0.0	0.0	0.0	0.0	0.0	0.0	0.0	0.0	0.0	4.0	21.0	0.0	0.0	1.0	5.0	0.0	0.0	125.0	0.0	200.0	0.0	0.0	0.0	7.0	0.0	0.0	0.0	0.0	11.0	0.0	0.0	0.0	0.0	0.0	0.0
OTU115739248	Bacteria; Parcubacteria; Candidatus Kuenenbacteria; uncultured bacterium; uncultured bacterium; uncultured bacterium; uncultured bacterium	2.0	1.0	0.0	3.0	0.0	2.0	0.0	1.0	0.0	12.0	15.0	2.0	8.0	5.0	1.0	17.0	1.0	16.0	5.0	10.0	8.0	10.0	24.0	13.0	7.0	39.0	13.0	32.0	2.0	0.0	5.0	4.0	20.0	7.0	0.0	12.0	0.0	0.0	0.0	6.0	1.0	6.0
OTU86736623	Bacteria; Proteobacteria; Deltaproteobacteria; Desulfarculales; Desulfarculaceae; uncultured; uncultured bacterium	3.0	0.0	3.0	0.0	0.0	0.0	4.0	11.0	10.0	1.0	0.0	2.0	3.0	0.0	6.0	3.0	3.0	2.0	0.0	0.0	0.0	0.0	1.0	4.0	5.0	1.0	10.0	1.0	0.0	0.0	0.0	2.0	0.0	0.0	76.0	120.0	0.0	0.0	0.0	2.0	10.0	5.0
OTU316928465	Bacteria; Parcubacteria; uncultured bacterium; uncultured bacterium; uncultured bacterium; uncultured bacterium; uncultured bacterium	13.0	3.0	1.0	0.0	0.0	0.0	43.0	0.0	0.0	0.0	0.0	0.0	0.0	0.0	0.0	5.0	5.0	54.0	1.0	1.0	12.0	2.0	0.0	3.0	5.0	3.0	8.0	0.0	0.0	19.0	30.0	0.0	0.0	0.0	0.0	0.0	0.0	0.0	29.0	8.0	0.0	0.0
OTU558644743	Bacteria; Firmicutes; Clostridia; Clostridiales; Defluviitaleaceae; Defluviitaleaceae UCG-011	38.0	0.0	0.0	0.0	0.0	0.0	0.0	10.0	15.0	0.0	1.0	0.0	2.0	0.0	0.0	0.0	1.0	0.0	0.0	0.0	3.0	0.0	0.0	0.0	0.0	0.0	0.0	21.0	3.0	0.0	3.0	68.0	0.0	0.0	0.0	0.0	0.0	0.0	0.0	1.0	0.0	2.0
OTU371367603	Bacteria; Proteobacteria; Deltaproteobacteria; Desulfarculales; Desulfarculaceae; Desulfatiglans	0.0	0.0	8.0	0.0	0.0	0.0	0.0	0.0	2.0	1.0	8.0	2.0	0.0	14.0	0.0	1.0	2.0	2.0	4.0	1.0	0.0	13.0	3.0	22.0	1.0	5.0	1.0	5.0	52.0	12.0	10.0	0.0	5.0	0.0	24.0	0.0	0.0	128.0	0.0	3.0	0.0	7.0
OTU868064312	Bacteria; Planctomycetes; Planctomycetacia; Planctomycetales; Planctomycetaceae; uncultured; uncultured soil bacterium	0.0	1.0	12.0	1.0	0.0	0.0	19.0	3.0	2.0	1.0	0.0	0.0	1.0	1.0	0.0	2.0	13.0	21.0	10.0	2.0	5.0	1.0	10.0	5.0	16.0	43.0	15.0	0.0	0.0	0.0	0.0	0.0	0.0	0.0	0.0	0.0	16.0	0.0	0.0	0.0	3.0	3.0
OTU854817694	Bacteria; Parcubacteria; Candidatus Moranbacteria; uncultured bacterium; uncultured bacterium; uncultured bacterium; uncultured bacterium	0.0	0.0	0.0	0.0	0.0	0.0	0.0	0.0	0.0	0.0	0.0	0.0	0.0	3.0	10.0	2.0	0.0	32.0	99.0	0.0	109.0	0.0	0.0	0.0	1.0	0.0	0.0	0.0	0.0	0.0	1.0	0.0	0.0	0.0	0.0	0.0	0.0	0.0	0.0	0.0	0.0	0.0
OTU40590544	Bacteria; Parcubacteria; Candidatus Moranbacteria; uncultured bacterium; uncultured bacterium; uncultured bacterium; uncultured bacterium	3.0	0.0	2.0	3.0	1.0	1.0	0.0	0.0	1.0	38.0	13.0	28.0	1.0	1.0	0.0	0.0	1.0	0.0	5.0	0.0	0.0	5.0	7.0	10.0	0.0	1.0	0.0	22.0	4.0	36.0	17.0	15.0	8.0	0.0	0.0	1.0	0.0	0.0	0.0	8.0	0.0	2.0
OTU120172310	Unassigned	1.0	1.0	3.0	3.0	0.0	1.0	3.0	5.0	0.0	4.0	23.0	1.0	3.0	16.0	5.0	9.0	2.0	9.0	17.0	20.0	28.0	0.0	1.0	11.0	3.0	16.0	2.0	5.0	0.0	29.0	1.0	6.0	0.0	0.0	0.0	0.0	58.0	0.0	0.0	14.0	5.0	49.0
OTU91484948	Bacteria; Proteobacteria; Alphaproteobacteria; Rhodospirillales; Rhodospirillaceae; Azospirillum	0.0	6.0	11.0	0.0	3.0	0.0	12.0	35.0	11.0	6.0	0.0	0.0	4.0	1.0	5.0	0.0	0.0	0.0	11.0	1.0	2.0	5.0	0.0	8.0	1.0	0.0	0.0	5.0	51.0	4.0	0.0	0.0	8.0	0.0	0.0	0.0	0.0	0.0	0.0	0.0	5.0	9.0
OTU913483648	Bacteria; Bacteroidetes; Bacteroidetes BD2-2	0.0	0.0	7.0	0.0	1.0	1.0	10.0	0.0	2.0	0.0	8.0	3.0	9.0	2.0	1.0	21.0	7.0	27.0	0.0	23.0	8.0	21.0	0.0	7.0	45.0	8.0	10.0	0.0	0.0	85.0	6.0	3.0	0.0	0.0	0.0	0.0	0.0	0.0	0.0	3.0	0.0	0.0
OTU935119775	Bacteria; Bacteroidetes; SB-5	31.0	11.0	4.0	2.0	1.0	0.0	52.0	115.0	95.0	17.0	17.0	13.0	17.0	42.0	9.0	3.0	0.0	1.0	79.0	56.0	56.0	0.0	6.0	14.0	0.0	0.0	3.0	0.0	16.0	0.0	22.0	8.0	0.0	0.0	40.0	0.0	0.0	0.0	0.0	50.0	130.0	39.0
OTU640269858	Bacteria; Proteobacteria; Deltaproteobacteria; Desulfarculales; Desulfarculaceae; Desulfatiglans; Ambiguous_taxa	1.0	0.0	0.0	2.0	1.0	4.0	3.0	3.0	0.0	2.0	11.0	7.0	11.0	5.0	8.0	8.0	7.0	12.0	6.0	3.0	12.0	0.0	15.0	5.0	3.0	6.0	8.0	24.0	0.0	22.0	5.0	0.0	0.0	0.0	0.0	21.0	0.0	0.0	0.0	2.0	6.0	1.0
OTU731402148	Bacteria; Proteobacteria; Deltaproteobacteria; Desulfobacterales; Desulfobulbaceae; Desulfobulbus; uncultured bacterium	0.0	2.0	0.0	0.0	0.0	1.0	0.0	0.0	0.0	0.0	0.0	0.0	0.0	47.0	0.0	8.0	43.0	5.0	5.0	1.0	17.0	0.0	0.0	0.0	0.0	86.0	0.0	0.0	0.0	0.0	0.0	0.0	0.0	0.0	0.0	0.0	0.0	0.0	0.0	0.0	0.0	0.0
OTU62818557	Bacteria; Nitrospirae; Nitrospira; Nitrospirales; BMS9AB35; uncultured bacterium; uncultured bacterium	0.0	0.0	0.0	0.0	0.0	0.0	0.0	0.0	0.0	0.0	0.0	0.0	0.0	0.0	0.0	1.0	0.0	0.0	0.0	0.0	0.0	0.0	0.0	9.0	14.0	261.0	0.0	0.0	0.0	0.0	0.0	0.0	0.0	0.0	0.0	0.0	0.0	0.0	0.0	0.0	0.0	0.0
OTU75608185	Archaea; Aenigmarchaeota; Aenigmarchaeota Incertae Sedis; Unknown Order; Unknown Family; Candidatus Aenigmarchaeum; uncultured archaeon	7.0	0.0	3.0	0.0	2.0	0.0	7.0	1.0	23.0	9.0	14.0	4.0	12.0	19.0	5.0	2.0	1.0	2.0	13.0	17.0	48.0	0.0	2.0	9.0	0.0	0.0	0.0	2.0	16.0	0.0	1.0	5.0	0.0	0.0	0.0	1.0	0.0	0.0	0.0	37.0	33.0	13.0
OTU435128725	Bacteria; Proteobacteria; Deltaproteobacteria; Desulfobacterales; Desulfobacteraceae; uncultured; uncultured bacterium	1.0	8.0	5.0	0.0	1.0	2.0	12.0	1.0	21.0	1.0	3.0	5.0	44.0	40.0	3.0	3.0	5.0	2.0	19.0	42.0	53.0	15.0	19.0	20.0	0.0	6.0	0.0	0.0	3.0	0.0	44.0	20.0	0.0	0.0	0.0	1.0	0.0	0.0	0.0	5.0	11.0	10.0
OTU176361604	Bacteria; Actinobacteria; Coriobacteriia; Coriobacteriales; Coriobacteriaceae; uncultured; uncultured bacterium	0.0	0.0	0.0	1.0	0.0	0.0	2.0	1.0	0.0	7.0	0.0	1.0	1.0	0.0	0.0	2.0	1.0	6.0	0.0	0.0	1.0	0.0	0.0	0.0	0.0	0.0	0.0	16.0	0.0	0.0	0.0	0.0	0.0	0.0	5.0	0.0	0.0	119.0	59.0	2.0	0.0	4.0
OTU875741757	Unassigned	0.0	0.0	0.0	0.0	0.0	0.0	0.0	0.0	0.0	0.0	0.0	0.0	0.0	0.0	0.0	0.0	0.0	0.0	0.0	0.0	0.0	119.0	37.0	45.0	0.0	0.0	0.0	0.0	0.0	0.0	0.0	0.0	0.0	0.0	0.0	0.0	0.0	0.0	0.0	0.0	0.0	0.0
OTU884119595	Bacteria; Proteobacteria; Deltaproteobacteria; Desulfobacterales; Desulfobacteraceae; uncultured; Ambiguous_taxa	0.0	26.0	14.0	7.0	4.0	19.0	8.0	3.0	5.0	22.0	27.0	3.0	44.0	13.0	30.0	15.0	4.0	19.0	53.0	17.0	6.0	2.0	41.0	49.0	6.0	20.0	11.0	84.0	107.0	107.0	63.0	127.0	41.0	0.0	0.0	13.0	58.0	0.0	50.0	2.0	3.0	3.0
OTU463692450	Bacteria; Gracilibacteria; uncultured bacterium; uncultured bacterium; uncultured bacterium; uncultured bacterium; uncultured bacterium	0.0	0.0	0.0	1.0	1.0	0.0	0.0	11.0	9.0	0.0	3.0	0.0	0.0	0.0	0.0	0.0	0.0	0.0	4.0	1.0	2.0	0.0	0.0	0.0	0.0	0.0	3.0	0.0	0.0	0.0	0.0	0.0	0.0	0.0	77.0	2.0	0.0	0.0	0.0	43.0	50.0	10.0
OTU972349429	Unassigned	0.0	1.0	0.0	0.0	0.0	0.0	5.0	0.0	1.0	15.0	15.0	24.0	18.0	8.0	13.0	1.0	4.0	3.0	25.0	18.0	2.0	0.0	0.0	0.0	0.0	0.0	1.0	0.0	0.0	0.0	5.0	33.0	5.0	0.0	6.0	0.0	0.0	0.0	0.0	4.0	18.0	5.0
OTU949600826	Unassigned	0.0	0.0	0.0	0.0	0.0	0.0	23.0	31.0	53.0	0.0	11.0	0.0	57.0	53.0	32.0	0.0	3.0	1.0	90.0	19.0	45.0	0.0	0.0	0.0	0.0	2.0	0.0	0.0	43.0	0.0	0.0	2.0	0.0	0.0	0.0	0.0	0.0	0.0	0.0	0.0	5.0	0.0
OTU725640883	Unassigned	4.0	1.0	3.0	4.0	6.0	3.0	7.0	5.0	66.0	57.0	20.0	21.0	31.0	24.0	0.0	2.0	2.0	2.0	99.0	16.0	18.0	40.0	17.0	45.0	0.0	0.0	4.0	21.0	24.0	13.0	19.0	3.0	15.0	0.0	0.0	31.0	0.0	10.0	50.0	128.0	105.0	5.0
OTU178404551	Bacteria; Bacteroidetes; Cytophagia; Cytophagales; Cyclobacteriaceae; uncultured; uncultured bacterium	8.0	0.0	0.0	1.0	9.0	9.0	0.0	0.0	0.0	1.0	0.0	0.0	0.0	0.0	0.0	0.0	0.0	0.0	0.0	0.0	0.0	0.0	8.0	8.0	0.0	0.0	0.0	23.0	14.0	94.0	0.0	0.0	0.0	0.0	0.0	0.0	0.0	0.0	0.0	0.0	0.0	0.0
OTU651869566	Bacteria; Proteobacteria; Deltaproteobacteria; Syntrophobacterales; Syntrophaceae; Desulfomonile; uncultured bacterium	0.0	3.0	7.0	0.0	0.0	0.0	4.0	3.0	4.0	1.0	3.0	2.0	3.0	9.0	0.0	3.0	2.0	12.0	0.0	1.0	3.0	2.0	6.0	5.0	13.0	28.0	5.0	4.0	58.0	0.0	1.0	7.0	1.0	0.0	0.0	0.0	42.0	0.0	0.0	4.0	4.0	1.0
OTU476627638	Bacteria; Spirochaetae; Spirochaetes; Spirochaetales; Leptospiraceae; uncultured	0.0	0.0	0.0	5.0	2.0	0.0	0.0	0.0	0.0	1.0	0.0	0.0	2.0	0.0	0.0	0.0	1.0	0.0	0.0	0.0	0.0	0.0	0.0	0.0	0.0	0.0	0.0	1.0	98.0	0.0	0.0	0.0	0.0	0.0	0.0	0.0	68.0	0.0	0.0	0.0	4.0	0.0
OTU698146030	Bacteria; Firmicutes; Clostridia; Clostridiales; Family XII; Acidaminobacter; uncultured bacterium	12.0	0.0	0.0	40.0	32.0	21.0	2.0	3.0	0.0	0.0	5.0	0.0	0.0	0.0	0.0	0.0	0.0	1.0	11.0	5.0	4.0	0.0	2.0	0.0	0.0	0.0	0.0	0.0	0.0	0.0	2.0	0.0	15.0	0.0	0.0	0.0	0.0	0.0	0.0	1.0	5.0	0.0
OTU90095514	Bacteria; Parcubacteria; uncultured bacterium; uncultured bacterium; uncultured bacterium; uncultured bacterium; uncultured bacterium	0.0	0.0	1.0	0.0	0.0	0.0	0.0	2.0	2.0	0.0	0.0	0.0	2.0	2.0	15.0	0.0	5.0	1.0	0.0	129.0	87.0	0.0	0.0	3.0	0.0	0.0	0.0	0.0	0.0	0.0	0.0	0.0	0.0	0.0	0.0	0.0	0.0	0.0	0.0	1.0	40.0	9.0
OTU939237198	Bacteria; Parcubacteria; uncultured bacterium; uncultured bacterium; uncultured bacterium; uncultured bacterium; uncultured bacterium	0.0	0.0	0.0	0.0	0.0	0.0	0.0	0.0	0.0	0.0	0.0	0.0	0.0	15.0	9.0	0.0	0.0	0.0	1.0	1.0	395.0	0.0	0.0	4.0	0.0	0.0	1.0	0.0	0.0	0.0	0.0	0.0	0.0	0.0	0.0	0.0	0.0	0.0	0.0	0.0	0.0	24.0
OTU404975033	Unassigned	0.0	8.0	3.0	1.0	2.0	0.0	0.0	0.0	4.0	53.0	2.0	3.0	5.0	1.0	1.0	1.0	0.0	0.0	6.0	25.0	1.0	3.0	1.0	1.0	0.0	0.0	1.0	0.0	0.0	6.0	19.0	0.0	0.0	0.0	0.0	0.0	0.0	0.0	0.0	0.0	0.0	2.0
OTU570654919	Bacteria; Proteobacteria; Deltaproteobacteria; Desulfobacterales; Desulfobacteraceae; Desulfatitalea; uncultured bacterium	0.0	1.0	7.0	7.0	0.0	1.0	19.0	57.0	33.0	0.0	5.0	0.0	0.0	14.0	4.0	0.0	2.0	0.0	0.0	0.0	4.0	8.0	0.0	2.0	0.0	4.0	1.0	50.0	88.0	63.0	1.0	0.0	0.0	0.0	0.0	8.0	0.0	0.0	0.0	2.0	0.0	4.0
OTU998426866	Unassigned	0.0	0.0	1.0	2.0	1.0	0.0	1.0	8.0	6.0	1.0	0.0	0.0	40.0	3.0	4.0	1.0	1.0	0.0	33.0	27.0	7.0	0.0	0.0	9.0	0.0	2.0	1.0	0.0	0.0	0.0	9.0	0.0	0.0	0.0	0.0	0.0	0.0	0.0	0.0	9.0	37.0	4.0
OTU867184372	Bacteria; Proteobacteria; Deltaproteobacteria; Syntrophobacterales; Syntrophaceae; Desulfomonile; Ambiguous_taxa	0.0	0.0	0.0	6.0	0.0	4.0	0.0	0.0	2.0	7.0	5.0	0.0	3.0	1.0	0.0	0.0	2.0	0.0	4.0	0.0	0.0	1.0	30.0	0.0	1.0	3.0	0.0	39.0	43.0	31.0	23.0	0.0	0.0	32.0	0.0	1.0	40.0	0.0	0.0	0.0	2.0	0.0
OTU268813887	Bacteria; Parcubacteria; Candidatus Moranbacteria; uncultured bacterium; uncultured bacterium; uncultured bacterium; uncultured bacterium	8.0	0.0	2.0	0.0	2.0	0.0	0.0	0.0	0.0	3.0	5.0	0.0	0.0	1.0	1.0	0.0	0.0	0.0	2.0	1.0	3.0	16.0	18.0	2.0	2.0	0.0	0.0	16.0	1.0	0.0	16.0	0.0	11.0	0.0	0.0	1.0	59.0	0.0	59.0	1.0	1.0	0.0
OTU817197795	Bacteria; Proteobacteria; Betaproteobacteria; Burkholderiales; Comamonadaceae; Hydrogenophaga	43.0	42.0	29.0	85.0	94.0	99.0	1.0	0.0	21.0	65.0	8.0	19.0	4.0	9.0	0.0	0.0	0.0	0.0	0.0	0.0	0.0	21.0	211.0	41.0	0.0	0.0	4.0	9.0	223.0	8.0	2.0	1.0	0.0	0.0	0.0	1.0	0.0	0.0	0.0	0.0	0.0	3.0
OTU960440439	Bacteria; Bacteroidetes; Sphingobacteriia; Sphingobacteriales; Lentimicrobiaceae; uncultured bacterium; uncultured bacterium	0.0	0.0	0.0	2.0	1.0	0.0	0.0	0.0	0.0	0.0	3.0	0.0	0.0	0.0	0.0	27.0	18.0	10.0	0.0	0.0	0.0	0.0	0.0	5.0	0.0	69.0	2.0	0.0	0.0	9.0	11.0	0.0	0.0	0.0	0.0	0.0	0.0	0.0	0.0	0.0	0.0	0.0
OTU90429257	Bacteria; Proteobacteria; Deltaproteobacteria; 43F-1404R; Ambiguous_taxa; Ambiguous_taxa; Ambiguous_taxa	0.0	0.0	0.0	0.0	0.0	0.0	0.0	0.0	0.0	0.0	0.0	0.0	5.0	0.0	0.0	2.0	11.0	103.0	0.0	0.0	0.0	0.0	0.0	0.0	0.0	22.0	0.0	0.0	0.0	0.0	0.0	0.0	0.0	0.0	0.0	0.0	0.0	0.0	0.0	0.0	7.0	1.0
OTU833181255	Bacteria; Proteobacteria; Gammaproteobacteria; Chromatiales; Halothiobacillaceae; Thiovirga; uncultured bacterium	10.0	51.0	259.0	59.0	38.0	69.0	0.0	0.0	0.0	58.0	27.0	41.0	0.0	0.0	2.0	0.0	0.0	0.0	0.0	0.0	0.0	16.0	0.0	1.0	0.0	0.0	0.0	0.0	1.0	7.0	2.0	0.0	0.0	0.0	0.0	0.0	0.0	0.0	0.0	0.0	0.0	0.0
OTU723901311	Bacteria; Parcubacteria; Candidatus Falkowbacteria; uncultured Parcubacteria group bacterium; uncultured Parcubacteria group bacterium; uncultured Parcubacteria group bacterium; uncultured Parcubacteria group bacterium	0.0	0.0	0.0	0.0	1.0	1.0	36.0	61.0	15.0	5.0	0.0	0.0	31.0	62.0	43.0	2.0	1.0	2.0	234.0	393.0	39.0	0.0	0.0	0.0	0.0	0.0	0.0	0.0	0.0	0.0	0.0	2.0	0.0	0.0	0.0	3.0	0.0	0.0	0.0	133.0	61.0	38.0
OTU994166856	Bacteria; RBG-1 (Zixibacteria); uncultured bacterium; uncultured bacterium; uncultured bacterium; uncultured bacterium; uncultured bacterium	14.0	2.0	0.0	4.0	1.0	3.0	18.0	7.0	6.0	10.0	10.0	1.0	42.0	27.0	2.0	9.0	8.0	29.0	29.0	48.0	30.0	0.0	1.0	0.0	5.0	5.0	2.0	3.0	40.0	0.0	6.0	16.0	0.0	3.0	0.0	0.0	23.0	0.0	0.0	5.0	5.0	15.0
OTU596361011	Unassigned	0.0	0.0	0.0	0.0	0.0	0.0	0.0	0.0	3.0	0.0	0.0	0.0	0.0	0.0	0.0	9.0	0.0	0.0	0.0	0.0	0.0	34.0	0.0	0.0	1.0	0.0	0.0	0.0	0.0	0.0	255.0	0.0	0.0	0.0	0.0	0.0	0.0	0.0	0.0	0.0	0.0	0.0
OTU136046152	Bacteria; Bacteroidetes; Flavobacteriia; Flavobacteriales; Flavobacteriaceae; Flavobacterium; Ambiguous_taxa	0.0	3.0	0.0	0.0	0.0	0.0	0.0	0.0	0.0	0.0	0.0	0.0	0.0	0.0	0.0	0.0	0.0	0.0	0.0	0.0	0.0	4.0	12.0	34.0	0.0	0.0	0.0	71.0	0.0	52.0	0.0	0.0	0.0	0.0	0.0	0.0	0.0	0.0	0.0	0.0	0.0	0.0
OTU927375145	Bacteria; Nitrospirae; Nitrospira; Nitrospirales; Nitrospiraceae; uncultured; uncultured bacterium	0.0	3.0	1.0	0.0	0.0	0.0	5.0	1.0	2.0	0.0	0.0	0.0	1289.0	432.0	278.0	4.0	0.0	4.0	42.0	2.0	6.0	0.0	0.0	9.0	0.0	1.0	0.0	0.0	0.0	0.0	6.0	3.0	0.0	0.0	0.0	0.0	0.0	0.0	0.0	1.0	1.0	6.0
OTU528987170	Bacteria; Proteobacteria; Deltaproteobacteria; Syntrophobacterales; Syntrophobacteraceae; uncultured; uncultured bacterium	28.0	78.0	38.0	7.0	1.0	5.0	6.0	0.0	6.0	28.0	48.0	42.0	16.0	12.0	13.0	4.0	2.0	6.0	24.0	1.0	5.0	23.0	86.0	166.0	12.0	125.0	35.0	351.0	19.0	173.0	18.0	24.0	0.0	0.0	64.0	181.0	156.0	0.0	129.0	27.0	30.0	53.0
OTU911916491	Bacteria; Proteobacteria; Deltaproteobacteria; Desulfobacterales; Desulfobulbaceae; Desulfobulbus; uncultured bacterium	1.0	5.0	0.0	0.0	4.0	3.0	30.0	4.0	5.0	4.0	13.0	5.0	29.0	15.0	29.0	0.0	0.0	0.0	289.0	0.0	21.0	13.0	27.0	178.0	0.0	0.0	0.0	94.0	72.0	143.0	9.0	4.0	12.0	0.0	0.0	0.0	0.0	0.0	0.0	14.0	87.0	3.0
OTU921400172	Bacteria; Proteobacteria; Gammaproteobacteria; Legionellales; Coxiellaceae; Coxiella; uncultured bacterium	5.0	0.0	7.0	0.0	2.0	0.0	0.0	0.0	1.0	1.0	1.0	0.0	5.0	2.0	1.0	1.0	6.0	1.0	2.0	8.0	0.0	8.0	0.0	2.0	1.0	15.0	72.0	28.0	17.0	16.0	1.0	11.0	0.0	0.0	0.0	0.0	0.0	0.0	67.0	5.0	0.0	4.0
OTU959448228	Bacteria; Acidobacteria; Subgroup 6; uncultured bacterium; uncultured bacterium; uncultured bacterium; uncultured bacterium	87.0	55.0	54.0	8.0	3.0	11.0	6.0	14.0	15.0	14.0	7.0	16.0	1.0	2.0	0.0	26.0	13.0	26.0	30.0	33.0	44.0	115.0	83.0	145.0	23.0	46.0	42.0	73.0	17.0	62.0	21.0	26.0	11.0	0.0	20.0	22.0	60.0	54.0	46.0	21.0	25.0	17.0
OTU802242507	Bacteria; Verrucomicrobia; WCHB1-41; uncultured bacterium; uncultured bacterium; uncultured bacterium; uncultured bacterium	0.0	3.0	12.0	0.0	0.0	4.0	6.0	1.0	6.0	0.0	0.0	0.0	0.0	0.0	0.0	0.0	0.0	1.0	2.0	1.0	7.0	0.0	0.0	10.0	0.0	0.0	2.0	16.0	25.0	0.0	5.0	3.0	0.0	0.0	0.0	0.0	0.0	99.0	0.0	0.0	0.0	0.0
OTU551159803	Bacteria; Planctomycetes; Phycisphaerae; Phycisphaerales; ODP1230B30.02 sediment group; uncultured bacterium; uncultured bacterium	0.0	3.0	0.0	0.0	0.0	8.0	0.0	0.0	0.0	0.0	0.0	0.0	0.0	0.0	0.0	4.0	7.0	17.0	70.0	7.0	0.0	4.0	0.0	0.0	9.0	0.0	0.0	0.0	0.0	0.0	0.0	20.0	0.0	0.0	0.0	0.0	0.0	0.0	0.0	0.0	0.0	0.0
OTU806601057	Bacteria; Omnitrophica; uncultured bacterium; uncultured bacterium; uncultured bacterium; uncultured bacterium; uncultured bacterium	0.0	0.0	0.0	0.0	0.0	0.0	1.0	2.0	0.0	231.0	254.0	39.0	5.0	0.0	1.0	0.0	0.0	0.0	0.0	0.0	0.0	1.0	0.0	0.0	0.0	0.0	0.0	0.0	0.0	0.0	1.0	4.0	1.0	0.0	0.0	0.0	0.0	0.0	0.0	4.0	3.0	0.0
OTU308782761	Unassigned	0.0	1.0	1.0	0.0	0.0	0.0	57.0	4.0	2.0	1.0	6.0	0.0	11.0	18.0	14.0	14.0	1.0	10.0	4.0	51.0	58.0	0.0	0.0	1.0	2.0	3.0	0.0	0.0	0.0	0.0	0.0	25.0	0.0	0.0	0.0	0.0	0.0	0.0	0.0	18.0	6.0	43.0
OTU677827002	Bacteria; Nitrospinae; MD2898-B26	0.0	0.0	0.0	0.0	1.0	0.0	25.0	65.0	113.0	0.0	0.0	1.0	44.0	19.0	17.0	2.0	26.0	1.0	233.0	48.0	97.0	1.0	0.0	0.0	0.0	2.0	0.0	0.0	0.0	0.0	1.0	0.0	0.0	0.0	0.0	6.0	0.0	0.0	0.0	83.0	60.0	44.0
OTU293182669	Unassigned	0.0	0.0	0.0	0.0	0.0	0.0	0.0	0.0	0.0	0.0	0.0	0.0	0.0	7.0	0.0	0.0	0.0	0.0	2.0	0.0	0.0	0.0	0.0	11.0	0.0	422.0	0.0	0.0	0.0	0.0	0.0	0.0	0.0	0.0	0.0	0.0	0.0	0.0	0.0	0.0	0.0	11.0
OTU131422783	Bacteria; Latescibacteria; uncultured bacterium; uncultured bacterium; uncultured bacterium; uncultured bacterium; uncultured bacterium	2.0	0.0	3.0	0.0	0.0	2.0	2.0	4.0	5.0	9.0	4.0	0.0	5.0	9.0	12.0	4.0	6.0	18.0	14.0	28.0	30.0	0.0	0.0	4.0	1.0	2.0	0.0	0.0	0.0	15.0	0.0	1.0	0.0	0.0	0.0	0.0	0.0	51.0	0.0	6.0	2.0	2.0
OTU124284685	Bacteria; Parcubacteria; uncultured bacterium; uncultured bacterium; uncultured bacterium; uncultured bacterium; uncultured bacterium	0.0	0.0	0.0	0.0	0.0	0.0	44.0	3.0	5.0	0.0	0.0	0.0	0.0	0.0	0.0	3.0	11.0	0.0	2.0	50.0	29.0	0.0	0.0	0.0	0.0	0.0	0.0	0.0	0.0	0.0	0.0	0.0	0.0	0.0	0.0	0.0	0.0	0.0	0.0	0.0	1.0	8.0
OTU149597410	Bacteria; Ignavibacteriae; Ignavibacteria; Ignavibacteriales; IheB3-7; uncultured bacterium; uncultured bacterium	12.0	14.0	12.0	10.0	5.0	7.0	1.0	11.0	14.0	36.0	12.0	12.0	40.0	11.0	6.0	3.0	2.0	22.0	30.0	13.0	16.0	15.0	32.0	42.0	7.0	1.0	8.0	92.0	106.0	147.0	39.0	38.0	22.0	0.0	0.0	3.0	88.0	0.0	141.0	27.0	12.0	23.0
OTU812133665	Bacteria; Firmicutes; Clostridia; Clostridiales; Family XII; Fusibacter; uncultured bacterium	7.0	1.0	7.0	48.0	16.0	14.0	0.0	2.0	0.0	1.0	6.0	1.0	1.0	4.0	0.0	0.0	1.0	1.0	8.0	0.0	1.0	0.0	2.0	0.0	0.0	0.0	0.0	3.0	13.0	0.0	28.0	18.0	0.0	0.0	0.0	0.0	0.0	0.0	0.0	2.0	4.0	3.0
OTU138872051	Bacteria; Nitrospirae; Nitrospira; Nitrospirales; Nitrospiraceae; uncultured; uncultured bacterium	0.0	0.0	0.0	0.0	0.0	0.0	0.0	0.0	0.0	0.0	0.0	0.0	0.0	0.0	0.0	0.0	0.0	1.0	0.0	0.0	0.0	0.0	0.0	3.0	9.0	236.0	0.0	0.0	0.0	0.0	0.0	0.0	0.0	0.0	0.0	0.0	0.0	0.0	9.0	0.0	0.0	0.0
OTU909843849	Unassigned	3.0	0.0	0.0	0.0	0.0	0.0	4.0	5.0	0.0	0.0	0.0	0.0	10.0	4.0	11.0	5.0	3.0	5.0	2.0	15.0	26.0	0.0	1.0	4.0	0.0	0.0	0.0	56.0	29.0	0.0	3.0	0.0	0.0	0.0	0.0	0.0	38.0	0.0	0.0	2.0	0.0	1.0
OTU770734485	Bacteria; Proteobacteria; Deltaproteobacteria; Desulfovibrionales; Desulfovibrionaceae; Desulfovibrio; Ambiguous_taxa	2.0	0.0	0.0	0.0	0.0	0.0	0.0	2.0	4.0	0.0	3.0	0.0	0.0	0.0	0.0	0.0	0.0	0.0	1.0	0.0	0.0	50.0	11.0	90.0	0.0	0.0	0.0	0.0	0.0	0.0	3.0	0.0	0.0	0.0	0.0	0.0	0.0	0.0	0.0	0.0	0.0	2.0
OTU666258766	Bacteria; Spirochaetae; Spirochaetes; Spirochaetales; Spirochaetaceae; Treponema 2; uncultured bacterium	954.0	1380.0	787.0	166.0	71.0	36.0	43.0	64.0	61.0	54.0	36.0	94.0	1.0	0.0	5.0	0.0	0.0	0.0	58.0	23.0	8.0	0.0	1.0	0.0	0.0	1.0	4.0	620.0	94.0	408.0	17.0	2.0	0.0	47.0	57.0	734.0	91.0	0.0	52.0	44.0	8.0	5.0
OTU778718714	Bacteria; Actinobacteria; OPB41; uncultured bacterium; uncultured bacterium; uncultured bacterium; uncultured bacterium	7.0	17.0	4.0	2.0	3.0	8.0	2.0	2.0	3.0	10.0	5.0	8.0	12.0	16.0	5.0	4.0	3.0	0.0	11.0	7.0	2.0	25.0	45.0	24.0	2.0	0.0	10.0	107.0	5.0	309.0	19.0	14.0	33.0	0.0	0.0	3.0	63.0	79.0	127.0	2.0	11.0	4.0
OTU351143627	Bacteria; Cyanobacteria; ML635J-21; uncultured bacterium; uncultured bacterium; uncultured bacterium; uncultured bacterium	0.0	0.0	0.0	0.0	0.0	0.0	0.0	0.0	0.0	0.0	0.0	0.0	0.0	6.0	0.0	3.0	0.0	182.0	0.0	8.0	0.0	0.0	0.0	0.0	0.0	177.0	0.0	0.0	0.0	0.0	0.0	0.0	0.0	0.0	0.0	0.0	0.0	0.0	0.0	0.0	0.0	3.0
OTU218982381	Bacteria; Proteobacteria; Deltaproteobacteria; Syntrophobacterales; Syntrophaceae; Syntrophus; Ambiguous_taxa	51.0	11.0	7.0	25.0	14.0	8.0	42.0	10.0	20.0	27.0	42.0	27.0	35.0	29.0	17.0	23.0	6.0	19.0	26.0	49.0	23.0	1.0	11.0	16.0	0.0	1.0	0.0	18.0	10.0	18.0	30.0	4.0	0.0	0.0	38.0	3.0	59.0	0.0	0.0	131.0	171.0	117.0
OTU665346111	Unassigned	0.0	4.0	10.0	0.0	0.0	0.0	25.0	12.0	14.0	0.0	0.0	0.0	29.0	1.0	39.0	1.0	14.0	34.0	1.0	430.0	19.0	0.0	1.0	0.0	0.0	126.0	21.0	0.0	31.0	0.0	5.0	1.0	0.0	0.0	0.0	0.0	0.0	0.0	0.0	0.0	13.0	2.0
OTU740552392	Bacteria; Proteobacteria; Deltaproteobacteria; Syntrophobacterales; Syntrophaceae; Desulfomonile	0.0	1.0	1.0	1.0	0.0	0.0	0.0	1.0	3.0	11.0	4.0	0.0	2.0	2.0	0.0	1.0	0.0	1.0	2.0	0.0	2.0	0.0	8.0	2.0	6.0	5.0	0.0	23.0	0.0	26.0	18.0	6.0	10.0	0.0	0.0	0.0	153.0	43.0	85.0	0.0	0.0	0.0
OTU993278735	Unassigned	0.0	6.0	0.0	1.0	0.0	4.0	16.0	2.0	24.0	32.0	17.0	24.0	4.0	0.0	2.0	2.0	4.0	5.0	14.0	17.0	20.0	2.0	1.0	13.0	0.0	0.0	2.0	23.0	34.0	9.0	74.0	12.0	6.0	0.0	14.0	0.0	0.0	0.0	30.0	8.0	21.0	1.0
OTU611317388	Unassigned	0.0	0.0	0.0	0.0	0.0	0.0	0.0	0.0	0.0	0.0	0.0	0.0	2.0	0.0	0.0	3.0	0.0	0.0	0.0	0.0	0.0	0.0	0.0	0.0	208.0	2.0	0.0	0.0	0.0	0.0	1.0	0.0	0.0	0.0	0.0	0.0	0.0	0.0	0.0	0.0	0.0	0.0
OTU308577725	Bacteria; Gracilibacteria	0.0	0.0	0.0	2.0	1.0	0.0	0.0	0.0	0.0	17.0	15.0	6.0	0.0	3.0	0.0	1.0	7.0	2.0	4.0	0.0	0.0	0.0	14.0	8.0	1.0	2.0	3.0	0.0	23.0	58.0	11.0	12.0	1.0	2.0	0.0	4.0	0.0	53.0	0.0	42.0	0.0	12.0
OTU95453318	Bacteria; Nitrospinae; MD2898-B26; uncultured bacterium; uncultured bacterium; uncultured bacterium; uncultured bacterium	0.0	0.0	0.0	0.0	0.0	0.0	0.0	0.0	1.0	0.0	0.0	2.0	0.0	4.0	0.0	0.0	1.0	0.0	0.0	180.0	15.0	0.0	0.0	0.0	0.0	0.0	0.0	0.0	0.0	0.0	0.0	0.0	0.0	0.0	0.0	0.0	0.0	0.0	0.0	0.0	12.0	1.0
OTU721273541	Bacteria; WS2; uncultured bacterium; uncultured bacterium; uncultured bacterium; uncultured bacterium; uncultured bacterium	0.0	0.0	0.0	0.0	0.0	2.0	15.0	1.0	16.0	1.0	0.0	7.0	10.0	15.0	2.0	5.0	4.0	5.0	4.0	43.0	21.0	9.0	5.0	0.0	0.0	0.0	1.0	0.0	0.0	20.0	2.0	0.0	0.0	0.0	0.0	0.0	0.0	0.0	0.0	0.0	3.0	37.0
OTU430856587	Bacteria; Gracilibacteria	4.0	1.0	0.0	0.0	2.0	1.0	0.0	0.0	0.0	32.0	4.0	14.0	0.0	2.0	2.0	4.0	13.0	0.0	4.0	0.0	0.0	5.0	10.0	12.0	1.0	2.0	2.0	12.0	37.0	14.0	50.0	24.0	10.0	0.0	0.0	0.0	25.0	0.0	0.0	6.0	5.0	6.0
OTU248702915	Bacteria; Omnitrophica; uncultured bacterium; uncultured bacterium; uncultured bacterium; uncultured bacterium; uncultured bacterium	3.0	0.0	0.0	5.0	0.0	0.0	3.0	0.0	0.0	2.0	4.0	0.0	0.0	1.0	0.0	0.0	1.0	0.0	0.0	48.0	3.0	0.0	0.0	5.0	0.0	20.0	0.0	46.0	0.0	17.0	0.0	0.0	0.0	0.0	0.0	0.0	0.0	0.0	0.0	0.0	4.0	1.0
OTU947157171	Bacteria; Parcubacteria; Candidatus Moranbacteria; uncultured bacterium; uncultured bacterium; uncultured bacterium; uncultured bacterium	0.0	1.0	5.0	2.0	0.0	6.0	7.0	0.0	0.0	9.0	0.0	0.0	0.0	19.0	19.0	3.0	11.0	15.0	4.0	24.0	2.0	0.0	0.0	13.0	0.0	1.0	0.0	0.0	0.0	42.0	2.0	0.0	25.0	0.0	16.0	0.0	0.0	0.0	0.0	2.0	0.0	1.0
OTU514253348	Archaea; Euryarchaeota; Thermoplasmata; Thermoplasmatales; AMOS1A-4113-D04; uncultured archaeon; uncultured archaeon	74.0	50.0	58.0	3.0	6.0	5.0	159.0	71.0	360.0	25.0	45.0	120.0	133.0	39.0	36.0	1.0	3.0	0.0	244.0	78.0	26.0	1.0	2.0	0.0	0.0	0.0	0.0	25.0	77.0	132.0	82.0	16.0	11.0	0.0	0.0	2.0	0.0	0.0	13.0	124.0	136.0	4.0
OTU570603489	Bacteria; Proteobacteria; Gammaproteobacteria; Legionellales; Coxiellaceae; Coxiella; uncultured bacterium	0.0	0.0	0.0	0.0	0.0	1.0	0.0	0.0	0.0	0.0	0.0	0.0	2.0	0.0	3.0	4.0	7.0	44.0	3.0	6.0	7.0	0.0	0.0	0.0	1.0	1.0	14.0	0.0	0.0	0.0	0.0	0.0	0.0	0.0	0.0	70.0	0.0	0.0	0.0	0.0	0.0	0.0
OTU56934650	Unassigned	0.0	69.0	0.0	0.0	0.0	0.0	0.0	0.0	0.0	0.0	0.0	25.0	0.0	0.0	0.0	22.0	0.0	1.0	0.0	0.0	0.0	4.0	0.0	0.0	3.0	22.0	1.0	0.0	0.0	0.0	15.0	0.0	0.0	0.0	0.0	0.0	0.0	0.0	0.0	0.0	0.0	0.0
OTU809217577	Bacteria; Chloroflexi; Anaerolineae; Anaerolineales; Anaerolineaceae; uncultured; uncultured bacterium	0.0	0.0	0.0	0.0	0.0	0.0	0.0	0.0	0.0	0.0	2.0	0.0	0.0	1.0	0.0	58.0	17.0	12.0	0.0	0.0	5.0	1.0	1.0	7.0	29.0	23.0	2.0	0.0	1.0	0.0	2.0	0.0	12.0	0.0	0.0	0.0	0.0	0.0	0.0	0.0	3.0	1.0
OTU503642221	Bacteria; Bacteroidetes; Sphingobacteriia; Sphingobacteriales; Lentimicrobiaceae; uncultured bacterium; uncultured bacterium	0.0	0.0	1.0	0.0	0.0	1.0	1.0	0.0	2.0	1.0	0.0	7.0	8.0	6.0	2.0	30.0	2.0	15.0	2.0	13.0	22.0	6.0	3.0	4.0	4.0	27.0	5.0	23.0	7.0	9.0	8.0	2.0	0.0	0.0	0.0	0.0	0.0	0.0	0.0	3.0	8.0	3.0
OTU167949211	Bacteria; Omnitrophica; uncultured bacterium; uncultured bacterium; uncultured bacterium; uncultured bacterium; uncultured bacterium	0.0	1.0	7.0	0.0	0.0	0.0	0.0	0.0	0.0	0.0	0.0	0.0	0.0	49.0	0.0	1.0	0.0	0.0	71.0	0.0	0.0	0.0	0.0	0.0	0.0	0.0	0.0	0.0	21.0	0.0	0.0	0.0	0.0	0.0	0.0	1.0	0.0	0.0	0.0	0.0	0.0	0.0
OTU592182332	Bacteria; Proteobacteria; Deltaproteobacteria; Syntrophobacterales; Syntrophaceae; Syntrophus; Ambiguous_taxa	308.0	125.0	148.0	6.0	11.0	7.0	21.0	61.0	31.0	13.0	10.0	25.0	6.0	20.0	0.0	1.0	9.0	2.0	28.0	24.0	36.0	0.0	0.0	0.0	1.0	7.0	20.0	10.0	2.0	0.0	15.0	11.0	0.0	0.0	69.0	64.0	0.0	0.0	0.0	15.0	27.0	5.0
OTU780908213	Bacteria; Proteobacteria; Betaproteobacteria; Rhodocyclales; Rhodocyclaceae; Propionivibrio; uncultured bacterium	0.0	0.0	20.0	11.0	15.0	2.0	45.0	96.0	40.0	3.0	12.0	3.0	7.0	1.0	6.0	2.0	0.0	0.0	81.0	191.0	174.0	4.0	0.0	0.0	0.0	0.0	0.0	3.0	159.0	20.0	15.0	0.0	0.0	0.0	28.0	83.0	0.0	0.0	0.0	0.0	0.0	0.0
OTU44909068	Bacteria; Proteobacteria; Deltaproteobacteria; Desulfobacterales; Desulfobacteraceae; Desulforegula	9.0	10.0	9.0	40.0	9.0	11.0	1.0	1.0	7.0	3.0	16.0	0.0	3.0	2.0	12.0	0.0	0.0	0.0	16.0	11.0	5.0	13.0	5.0	7.0	0.0	0.0	0.0	7.0	55.0	61.0	117.0	24.0	6.0	11.0	53.0	112.0	0.0	54.0	0.0	3.0	1.0	0.0
OTU557415573	Bacteria; Chloroflexi; Anaerolineae; Anaerolineales; Anaerolineaceae; Anaerolineaceae UCG-001; uncultured bacterium	4.0	9.0	15.0	3.0	0.0	1.0	14.0	17.0	16.0	8.0	0.0	0.0	2.0	7.0	3.0	27.0	37.0	15.0	6.0	18.0	17.0	23.0	10.0	37.0	16.0	4.0	22.0	20.0	3.0	49.0	15.0	17.0	0.0	0.0	0.0	0.0	0.0	0.0	0.0	6.0	4.0	8.0
OTU663404570	Bacteria; Elusimicrobia; Elusimicrobia; Lineage IV; uncultured bacterium; uncultured bacterium; uncultured bacterium	0.0	0.0	0.0	0.0	1.0	0.0	19.0	11.0	11.0	0.0	0.0	0.0	2.0	10.0	2.0	0.0	0.0	0.0	8.0	1.0	7.0	5.0	16.0	0.0	0.0	0.0	0.0	0.0	4.0	0.0	2.0	0.0	0.0	0.0	0.0	1.0	0.0	0.0	0.0	9.0	46.0	11.0
OTU552497501	Bacteria; Bacteroidetes; Flavobacteriia; Flavobacteriales; Flavobacteriaceae; uncultured; Ambiguous_taxa	4.0	0.0	3.0	1.0	3.0	2.0	0.0	4.0	0.0	8.0	13.0	11.0	5.0	1.0	0.0	0.0	0.0	0.0	4.0	0.0	2.0	7.0	16.0	6.0	0.0	0.0	1.0	33.0	76.0	39.0	28.0	4.0	25.0	0.0	19.0	10.0	0.0	23.0	77.0	2.0	6.0	1.0
OTU289597801	Unassigned	0.0	0.0	0.0	0.0	0.0	0.0	9.0	0.0	3.0	5.0	3.0	2.0	7.0	3.0	37.0	1.0	0.0	2.0	16.0	36.0	25.0	2.0	0.0	6.0	0.0	0.0	0.0	0.0	0.0	0.0	8.0	0.0	0.0	0.0	0.0	0.0	0.0	0.0	0.0	12.0	3.0	8.0
OTU906439020	Bacteria; Proteobacteria; Deltaproteobacteria; Desulfobacterales; Desulfobulbaceae; Desulfobulbus	2.0	5.0	6.0	0.0	0.0	0.0	0.0	0.0	0.0	0.0	0.0	0.0	0.0	0.0	0.0	0.0	0.0	0.0	0.0	0.0	0.0	0.0	3.0	0.0	0.0	0.0	0.0	63.0	0.0	153.0	5.0	0.0	0.0	0.0	0.0	0.0	0.0	0.0	0.0	0.0	0.0	0.0
OTU472101950	Bacteria; Parcubacteria; Candidatus Nomurabacteria; uncultured bacterium; uncultured bacterium; uncultured bacterium; uncultured bacterium	0.0	0.0	11.0	0.0	0.0	0.0	0.0	0.0	0.0	2.0	0.0	0.0	0.0	0.0	1.0	28.0	3.0	25.0	0.0	0.0	1.0	16.0	0.0	2.0	18.0	93.0	35.0	0.0	0.0	54.0	7.0	0.0	0.0	0.0	29.0	0.0	0.0	0.0	0.0	0.0	0.0	1.0
OTU143686656	Bacteria; Parcubacteria; Candidatus Falkowbacteria; uncultured bacterium; uncultured bacterium; uncultured bacterium; uncultured bacterium	0.0	0.0	0.0	1.0	3.0	0.0	5.0	33.0	41.0	0.0	1.0	0.0	0.0	0.0	0.0	0.0	1.0	0.0	0.0	0.0	0.0	0.0	0.0	0.0	0.0	0.0	0.0	0.0	0.0	0.0	0.0	1.0	0.0	0.0	0.0	2.0	0.0	0.0	0.0	17.0	150.0	5.0
OTU526867881	Bacteria; Proteobacteria; Deltaproteobacteria; Syntrophobacterales; Syntrophaceae; Desulfomonile; uncultured bacterium	0.0	0.0	1.0	1.0	0.0	0.0	2.0	0.0	2.0	2.0	1.0	0.0	4.0	13.0	0.0	10.0	11.0	27.0	0.0	0.0	0.0	4.0	2.0	2.0	25.0	57.0	13.0	19.0	0.0	37.0	5.0	0.0	0.0	0.0	0.0	15.0	0.0	0.0	0.0	2.0	0.0	4.0
OTU28459362	Bacteria; Proteobacteria; Deltaproteobacteria; Desulfobacterales; Desulfobulbaceae	0.0	0.0	0.0	0.0	0.0	0.0	4.0	1.0	5.0	0.0	0.0	0.0	9.0	1.0	13.0	0.0	0.0	0.0	47.0	0.0	1.0	0.0	4.0	19.0	0.0	0.0	0.0	65.0	30.0	5.0	0.0	58.0	0.0	0.0	0.0	0.0	0.0	0.0	0.0	3.0	26.0	3.0
OTU463683870	Bacteria; Firmicutes; Clostridia; Clostridiales; Family XII	1.0	0.0	0.0	60.0	27.0	29.0	6.0	0.0	0.0	0.0	4.0	0.0	0.0	0.0	0.0	0.0	0.0	0.0	4.0	5.0	7.0	0.0	3.0	0.0	0.0	0.0	0.0	0.0	0.0	0.0	6.0	0.0	0.0	0.0	0.0	0.0	0.0	0.0	0.0	0.0	5.0	0.0
OTU790210132	Archaea; Woesearchaeota (DHVEG-6); uncultured euryarchaeote; uncultured euryarchaeote; uncultured euryarchaeote; uncultured euryarchaeote; uncultured euryarchaeote	0.0	0.0	1.0	2.0	0.0	0.0	0.0	0.0	0.0	2.0	12.0	0.0	0.0	0.0	0.0	0.0	0.0	0.0	0.0	0.0	0.0	0.0	0.0	0.0	0.0	0.0	0.0	125.0	0.0	144.0	0.0	0.0	0.0	0.0	5.0	0.0	0.0	0.0	0.0	0.0	0.0	0.0
OTU503235932	Bacteria; Planctomycetes; Planctomycetacia; Planctomycetales; Planctomycetaceae; uncultured	4.0	5.0	5.0	1.0	1.0	1.0	2.0	3.0	8.0	4.0	4.0	0.0	10.0	4.0	2.0	3.0	13.0	8.0	0.0	4.0	7.0	3.0	4.0	7.0	13.0	15.0	11.0	5.0	12.0	24.0	8.0	0.0	9.0	0.0	0.0	0.0	0.0	0.0	0.0	15.0	2.0	12.0
OTU742396168	Bacteria; Bacteroidetes; Bacteroidia; Bacteroidales; Rikenellaceae; vadinBC27 wastewater-sludge group; uncultured bacterium	1.0	0.0	0.0	0.0	0.0	0.0	0.0	0.0	0.0	0.0	0.0	0.0	0.0	0.0	0.0	0.0	0.0	0.0	0.0	0.0	0.0	2133.0	1.0	0.0	1.0	0.0	4.0	0.0	80.0	0.0	17.0	0.0	0.0	0.0	0.0	0.0	0.0	0.0	0.0	0.0	3.0	0.0
OTU851680412	Bacteria; Proteobacteria; Gammaproteobacteria; Legionellales; Coxiellaceae; Coxiella; uncultured bacterium	0.0	0.0	0.0	1.0	0.0	1.0	3.0	0.0	6.0	1.0	0.0	0.0	1.0	0.0	0.0	2.0	1.0	1.0	1.0	3.0	0.0	0.0	1.0	0.0	0.0	12.0	2.0	0.0	0.0	5.0	11.0	13.0	0.0	0.0	5.0	0.0	0.0	0.0	61.0	9.0	10.0	4.0
OTU523524286	Bacteria; Chloroflexi; Anaerolineae; Anaerolineales; Anaerolineaceae; Anaerolineaceae UCG-001; uncultured bacterium	5.0	8.0	4.0	2.0	1.0	0.0	0.0	4.0	4.0	3.0	0.0	5.0	0.0	1.0	1.0	5.0	7.0	5.0	16.0	4.0	1.0	17.0	3.0	7.0	11.0	12.0	16.0	22.0	14.0	0.0	5.0	2.0	11.0	0.0	0.0	1.0	0.0	0.0	0.0	4.0	10.0	7.0
OTU424025424	Unassigned	0.0	0.0	0.0	0.0	0.0	0.0	0.0	0.0	0.0	0.0	0.0	0.0	0.0	0.0	0.0	0.0	0.0	201.0	0.0	0.0	0.0	0.0	0.0	0.0	0.0	0.0	0.0	0.0	0.0	0.0	0.0	0.0	0.0	0.0	0.0	0.0	0.0	0.0	0.0	0.0	0.0	0.0
OTU215302621	Bacteria; Parcubacteria; uncultured bacterium; uncultured bacterium; uncultured bacterium; uncultured bacterium; uncultured bacterium	0.0	0.0	0.0	0.0	1.0	0.0	21.0	5.0	0.0	0.0	0.0	0.0	17.0	3.0	5.0	15.0	35.0	11.0	0.0	109.0	65.0	0.0	0.0	0.0	36.0	56.0	8.0	0.0	0.0	0.0	0.0	0.0	0.0	0.0	0.0	0.0	0.0	0.0	0.0	7.0	2.0	9.0
OTU675676662	Bacteria; Spirochaetae; Spirochaetes; Spirochaetales; Leptospiraceae; uncultured	0.0	1.0	1.0	22.0	3.0	3.0	1.0	20.0	33.0	6.0	12.0	1.0	2.0	26.0	11.0	0.0	0.0	0.0	45.0	15.0	8.0	6.0	9.0	4.0	0.0	0.0	1.0	34.0	111.0	99.0	8.0	2.0	0.0	0.0	0.0	210.0	85.0	0.0	97.0	6.0	14.0	9.0
OTU145052824	Bacteria; Proteobacteria; Deltaproteobacteria; Syntrophobacterales; Syntrophaceae; Syntrophus	0.0	5.0	24.0	0.0	0.0	0.0	0.0	0.0	0.0	0.0	0.0	0.0	0.0	0.0	0.0	8.0	13.0	127.0	10.0	18.0	0.0	0.0	0.0	0.0	0.0	3.0	2.0	0.0	0.0	0.0	0.0	1.0	0.0	0.0	0.0	0.0	0.0	0.0	0.0	0.0	0.0	15.0
OTU677718859	Bacteria; Proteobacteria; Epsilonproteobacteria; Campylobacterales; Helicobacteraceae; Sulfurimonas; Ambiguous_taxa	5.0	0.0	1.0	4.0	1.0	1.0	1.0	4.0	2.0	15.0	1.0	4.0	30.0	13.0	5.0	0.0	0.0	1.0	4.0	1.0	3.0	1.0	7.0	8.0	0.0	0.0	0.0	40.0	21.0	28.0	19.0	0.0	0.0	0.0	0.0	0.0	0.0	0.0	0.0	2.0	3.0	4.0
OTU996278455	Bacteria; Firmicutes; Clostridia; Clostridiales; Family XII; Fusibacter	3.0	5.0	9.0	31.0	38.0	34.0	2.0	1.0	4.0	1.0	7.0	0.0	1.0	0.0	0.0	0.0	0.0	0.0	3.0	0.0	4.0	0.0	2.0	0.0	0.0	0.0	3.0	17.0	0.0	79.0	8.0	0.0	19.0	3.0	49.0	70.0	0.0	0.0	0.0	0.0	1.0	0.0
OTU992433906	Bacteria; Acidobacteria; Holophagae; Holophagales; Holophagaceae; uncultured	0.0	1.0	6.0	4.0	0.0	0.0	10.0	20.0	54.0	7.0	10.0	9.0	8.0	0.0	1.0	3.0	11.0	1.0	0.0	8.0	4.0	0.0	6.0	17.0	0.0	3.0	14.0	53.0	13.0	36.0	8.0	0.0	0.0	0.0	22.0	0.0	0.0	0.0	0.0	0.0	3.0	0.0
OTU472734752	Bacteria; Proteobacteria; Deltaproteobacteria; Desulfobacterales; Desulfobacteraceae; Desulfococcus	0.0	3.0	1.0	0.0	1.0	0.0	10.0	4.0	6.0	1.0	0.0	0.0	47.0	17.0	18.0	0.0	0.0	0.0	39.0	27.0	2.0	0.0	0.0	0.0	0.0	0.0	0.0	0.0	8.0	0.0	0.0	0.0	0.0	0.0	0.0	0.0	0.0	0.0	0.0	13.0	8.0	7.0
OTU915739855	Bacteria; Parcubacteria; uncultured bacterium; uncultured bacterium; uncultured bacterium; uncultured bacterium; uncultured bacterium	14.0	14.0	5.0	2.0	3.0	7.0	24.0	106.0	80.0	101.0	37.0	56.0	119.0	21.0	12.0	3.0	0.0	7.0	113.0	95.0	69.0	34.0	14.0	19.0	3.0	1.0	2.0	64.0	334.0	42.0	18.0	22.0	7.0	0.0	20.0	142.0	98.0	154.0	338.0	97.0	191.0	27.0
OTU992042370	Bacteria; Proteobacteria; Deltaproteobacteria; Desulfobacterales; Desulfobulbaceae	17.0	7.0	2.0	7.0	1.0	2.0	12.0	4.0	24.0	9.0	24.0	14.0	11.0	4.0	2.0	0.0	3.0	4.0	0.0	9.0	0.0	8.0	70.0	4.0	1.0	3.0	8.0	389.0	42.0	162.0	7.0	0.0	7.0	0.0	0.0	43.0	0.0	29.0	27.0	8.0	2.0	0.0
OTU316657294	Bacteria; Chloroflexi; Anaerolineae; Anaerolineales; Anaerolineaceae; Anaerolinea; uncultured bacterium	11.0	6.0	16.0	0.0	0.0	0.0	14.0	8.0	21.0	1.0	3.0	5.0	0.0	1.0	0.0	6.0	8.0	14.0	0.0	0.0	4.0	1.0	0.0	2.0	47.0	50.0	44.0	9.0	35.0	5.0	2.0	0.0	0.0	0.0	0.0	97.0	0.0	4.0	0.0	6.0	18.0	3.0
OTU70113206	Unassigned	0.0	3.0	1.0	0.0	0.0	0.0	7.0	3.0	6.0	2.0	9.0	0.0	3.0	1.0	3.0	0.0	1.0	0.0	16.0	18.0	10.0	2.0	1.0	4.0	0.0	0.0	1.0	0.0	9.0	37.0	1.0	0.0	0.0	0.0	0.0	0.0	0.0	0.0	0.0	12.0	16.0	3.0
OTU157265903	Unassigned	1.0	1.0	0.0	1.0	0.0	0.0	0.0	0.0	1.0	12.0	2.0	0.0	1.0	0.0	0.0	0.0	2.0	1.0	2.0	0.0	0.0	0.0	9.0	4.0	0.0	3.0	1.0	3.0	7.0	14.0	2.0	0.0	0.0	3.0	0.0	0.0	12.0	0.0	59.0	0.0	8.0	1.0
OTU132263681	Bacteria; Proteobacteria; Deltaproteobacteria; Deltaproteobacteria Incertae Sedis; Syntrophorhabdaceae; Syntrophorhabdus; uncultured bacterium	0.0	1.0	1.0	2.0	1.0	2.0	2.0	0.0	4.0	0.0	0.0	8.0	0.0	2.0	0.0	4.0	4.0	17.0	7.0	2.0	1.0	2.0	6.0	0.0	13.0	2.0	3.0	12.0	0.0	20.0	76.0	6.0	7.0	0.0	19.0	0.0	67.0	0.0	0.0	1.0	0.0	2.0
OTU641836283	Bacteria; Firmicutes; Clostridia; Clostridiales; Family XIII; [Eubacterium] brachy group	3.0	0.0	0.0	1.0	0.0	1.0	2.0	2.0	0.0	3.0	0.0	0.0	2.0	0.0	0.0	0.0	1.0	3.0	0.0	0.0	0.0	23.0	9.0	12.0	1.0	0.0	1.0	37.0	35.0	9.0	18.0	62.0	11.0	0.0	0.0	18.0	0.0	23.0	128.0	0.0	0.0	0.0
OTU724274136	Bacteria; Latescibacteria; Ambiguous_taxa; Ambiguous_taxa; Ambiguous_taxa; Ambiguous_taxa; Ambiguous_taxa	0.0	1.0	0.0	2.0	0.0	0.0	14.0	11.0	19.0	13.0	0.0	10.0	15.0	17.0	11.0	2.0	5.0	9.0	61.0	86.0	108.0	0.0	0.0	2.0	0.0	4.0	0.0	0.0	0.0	0.0	0.0	5.0	0.0	0.0	0.0	2.0	0.0	0.0	0.0	9.0	14.0	21.0
OTU246239332	Bacteria; Spirochaetae; Spirochaetes; Spirochaetales; Leptospiraceae; uncultured	32.0	14.0	4.0	0.0	1.0	0.0	0.0	0.0	4.0	0.0	0.0	0.0	0.0	0.0	0.0	0.0	1.0	0.0	0.0	0.0	0.0	0.0	0.0	0.0	0.0	0.0	2.0	33.0	0.0	57.0	0.0	0.0	0.0	0.0	18.0	0.0	0.0	0.0	0.0	0.0	0.0	0.0
OTU711526518	Bacteria; Nitrospirae; Nitrospira; Nitrospirales; Nitrospiraceae; uncultured	11.0	3.0	0.0	9.0	0.0	1.0	0.0	0.0	0.0	0.0	16.0	28.0	4.0	0.0	0.0	0.0	0.0	0.0	3.0	1.0	3.0	3.0	28.0	31.0	0.0	1.0	0.0	191.0	42.0	22.0	0.0	6.0	0.0	0.0	0.0	0.0	0.0	0.0	1.0	1.0	10.0	0.0
OTU499230474	Bacteria; Verrucomicrobia; Opitutae; Puniceicoccales; Puniceicoccaceae; Puniceicoccus; uncultured organism	34.0	77.0	73.0	6.0	7.0	0.0	0.0	14.0	15.0	22.0	7.0	8.0	0.0	0.0	0.0	0.0	0.0	0.0	0.0	2.0	2.0	2.0	6.0	7.0	0.0	0.0	0.0	139.0	0.0	88.0	0.0	0.0	2.0	28.0	0.0	3.0	0.0	0.0	0.0	3.0	8.0	1.0
OTU691346812	Bacteria; Proteobacteria; Gammaproteobacteria; Pseudomonadales; Pseudomonadaceae; Pseudomonas	20.0	49.0	5.0	17.0	64.0	16.0	0.0	0.0	0.0	1.0	0.0	17.0	1.0	0.0	0.0	0.0	0.0	0.0	0.0	0.0	0.0	2.0	6.0	13.0	0.0	0.0	0.0	1.0	0.0	0.0	0.0	0.0	0.0	0.0	0.0	0.0	0.0	0.0	0.0	0.0	0.0	0.0
OTU808680328	Unassigned	0.0	0.0	0.0	0.0	0.0	0.0	1.0	4.0	0.0	0.0	0.0	0.0	8.0	0.0	28.0	0.0	0.0	0.0	0.0	4.0	0.0	0.0	0.0	0.0	0.0	0.0	0.0	0.0	0.0	0.0	1.0	0.0	0.0	0.0	0.0	0.0	0.0	0.0	0.0	0.0	117.0	0.0
OTU539708135	Bacteria; Parcubacteria; Candidatus Falkowbacteria; uncultured bacterium; uncultured bacterium; uncultured bacterium; uncultured bacterium	0.0	0.0	0.0	0.0	3.0	0.0	0.0	3.0	8.0	2.0	3.0	4.0	43.0	16.0	153.0	0.0	0.0	0.0	141.0	0.0	0.0	0.0	12.0	102.0	0.0	0.0	0.0	0.0	23.0	88.0	3.0	0.0	0.0	0.0	0.0	4.0	1.0	41.0	0.0	155.0	1717.0	1.0
OTU182425926	Bacteria; Proteobacteria; Deltaproteobacteria; Desulfovibrionales; Desulfovibrionaceae; Desulfovibrio	0.0	0.0	4.0	0.0	0.0	0.0	0.0	0.0	0.0	0.0	0.0	0.0	0.0	0.0	0.0	0.0	0.0	0.0	0.0	0.0	0.0	0.0	0.0	0.0	0.0	0.0	0.0	11.0	17.0	124.0	0.0	0.0	0.0	0.0	0.0	0.0	0.0	0.0	1.0	0.0	0.0	0.0
OTU363481230	Bacteria; Parcubacteria; Candidatus Moranbacteria; uncultured bacterium; uncultured bacterium; uncultured bacterium; uncultured bacterium	0.0	10.0	0.0	0.0	0.0	0.0	1.0	0.0	0.0	0.0	0.0	0.0	0.0	6.0	0.0	80.0	28.0	18.0	2.0	0.0	0.0	3.0	0.0	20.0	0.0	57.0	1.0	0.0	0.0	0.0	2.0	0.0	0.0	0.0	21.0	0.0	0.0	0.0	0.0	0.0	0.0	19.0
OTU891420441	Unassigned	0.0	0.0	0.0	0.0	0.0	0.0	0.0	17.0	8.0	0.0	0.0	0.0	0.0	0.0	2.0	0.0	2.0	1.0	203.0	59.0	4.0	0.0	0.0	4.0	0.0	0.0	0.0	0.0	0.0	0.0	0.0	0.0	0.0	0.0	0.0	0.0	0.0	0.0	0.0	0.0	7.0	0.0
OTU830341817	Unassigned	0.0	0.0	0.0	0.0	3.0	13.0	6.0	6.0	13.0	0.0	0.0	0.0	2.0	32.0	1.0	0.0	10.0	0.0	25.0	0.0	32.0	0.0	0.0	4.0	0.0	0.0	0.0	0.0	10.0	0.0	5.0	0.0	0.0	0.0	0.0	0.0	0.0	0.0	0.0	0.0	0.0	0.0
OTU642645125	Bacteria; Planctomycetes; Planctomycetacia; Planctomycetales; Planctomycetaceae; Pir4 lineage; uncultured bacterium	1.0	5.0	3.0	0.0	2.0	4.0	13.0	11.0	13.0	7.0	0.0	0.0	11.0	5.0	2.0	4.0	4.0	5.0	20.0	22.0	15.0	0.0	0.0	0.0	17.0	26.0	14.0	9.0	16.0	0.0	1.0	5.0	0.0	0.0	93.0	0.0	28.0	0.0	0.0	17.0	2.0	8.0
OTU740799153	Bacteria; Proteobacteria; Deltaproteobacteria; Desulfobacterales; Desulfobulbaceae; Desulforhopalus; uncultured bacterium	37.0	11.0	7.0	0.0	3.0	1.0	0.0	1.0	10.0	0.0	0.0	0.0	0.0	29.0	0.0	0.0	1.0	7.0	7.0	0.0	0.0	0.0	0.0	14.0	1.0	1.0	5.0	45.0	0.0	14.0	7.0	0.0	22.0	0.0	0.0	2.0	0.0	0.0	0.0	0.0	0.0	1.0
OTU752138791	Bacteria; TM6 (Dependentiae); uncultured organism; uncultured organism; uncultured organism; uncultured organism; uncultured organism	0.0	0.0	0.0	1.0	1.0	0.0	0.0	0.0	46.0	7.0	0.0	5.0	11.0	17.0	4.0	7.0	0.0	0.0	30.0	2.0	17.0	0.0	0.0	5.0	0.0	0.0	0.0	0.0	0.0	23.0	1.0	8.0	0.0	0.0	0.0	0.0	0.0	0.0	0.0	38.0	22.0	38.0
OTU745212370	Bacteria; Spirochaetae; Spirochaetes; Spirochaetales; Spirochaetaceae; Spirochaeta 2; uncultured bacterium	0.0	7.0	0.0	228.0	0.0	0.0	0.0	0.0	0.0	13.0	0.0	0.0	0.0	0.0	2.0	0.0	0.0	0.0	0.0	0.0	5.0	0.0	0.0	0.0	0.0	0.0	0.0	0.0	51.0	0.0	0.0	0.0	0.0	0.0	0.0	0.0	0.0	0.0	0.0	0.0	0.0	0.0
OTU126786180	Bacteria; Proteobacteria; Deltaproteobacteria; Desulfobacterales; Desulfobacteraceae; uncultured; uncultured bacterium	0.0	5.0	3.0	0.0	0.0	0.0	0.0	0.0	0.0	0.0	0.0	0.0	0.0	0.0	0.0	39.0	31.0	142.0	0.0	0.0	0.0	0.0	0.0	0.0	0.0	179.0	0.0	0.0	0.0	0.0	0.0	0.0	0.0	0.0	0.0	0.0	0.0	0.0	0.0	0.0	0.0	1.0
OTU548639678	Bacteria; Parcubacteria; Candidatus Moranbacteria; uncultured bacterium; uncultured bacterium; uncultured bacterium; uncultured bacterium	3.0	0.0	3.0	2.0	0.0	0.0	0.0	0.0	0.0	11.0	4.0	6.0	4.0	0.0	1.0	3.0	2.0	0.0	3.0	0.0	0.0	9.0	24.0	0.0	3.0	0.0	0.0	4.0	0.0	8.0	6.0	17.0	22.0	0.0	0.0	0.0	0.0	0.0	0.0	8.0	7.0	1.0
OTU82241368	Bacteria; Deferribacteres; Deferribacteres Incertae Sedis; Unknown Order; Unknown Family; Caldithrix; uncultured bacterium	3.0	3.0	2.0	1.0	0.0	2.0	0.0	2.0	1.0	8.0	1.0	0.0	6.0	0.0	4.0	0.0	1.0	8.0	3.0	1.0	2.0	8.0	9.0	4.0	4.0	4.0	3.0	10.0	0.0	118.0	16.0	0.0	0.0	0.0	0.0	9.0	0.0	0.0	0.0	2.0	0.0	0.0
OTU48201267	Bacteria; Bacteroidetes; Flavobacteriia; Flavobacteriales; Flavobacteriaceae; Lutibacter; uncultured bacterium	0.0	0.0	2.0	2.0	12.0	2.0	0.0	4.0	0.0	0.0	0.0	0.0	0.0	0.0	0.0	0.0	1.0	3.0	0.0	2.0	0.0	109.0	4.0	0.0	11.0	0.0	5.0	16.0	13.0	76.0	3.0	0.0	0.0	0.0	0.0	0.0	0.0	0.0	0.0	0.0	0.0	0.0
OTU488235484	Bacteria; Proteobacteria; Deltaproteobacteria; FW113; uncultured organism; uncultured organism; uncultured organism	36.0	80.0	134.0	15.0	18.0	12.0	9.0	95.0	21.0	12.0	29.0	10.0	18.0	25.0	21.0	6.0	5.0	0.0	12.0	24.0	5.0	2.0	21.0	5.0	0.0	6.0	19.0	12.0	126.0	90.0	4.0	19.0	1.0	53.0	145.0	14.0	0.0	0.0	170.0	1.0	11.0	10.0
OTU195723885	Bacteria; Bacteroidetes; Bacteroidia; Bacteroidales; Rikenellaceae; Blvii28 wastewater-sludge group	0.0	0.0	0.0	2.0	0.0	0.0	0.0	2.0	5.0	37.0	1.0	0.0	0.0	0.0	0.0	6.0	0.0	1.0	0.0	0.0	0.0	2.0	0.0	0.0	0.0	0.0	0.0	0.0	1.0	40.0	3.0	0.0	0.0	0.0	0.0	17.0	81.0	0.0	0.0	0.0	0.0	0.0
OTU426393692	Unassigned	0.0	0.0	4.0	0.0	4.0	0.0	15.0	2.0	22.0	8.0	12.0	3.0	23.0	3.0	24.0	0.0	1.0	0.0	39.0	90.0	14.0	13.0	7.0	3.0	0.0	0.0	0.0	6.0	80.0	3.0	9.0	0.0	0.0	0.0	0.0	0.0	0.0	0.0	0.0	46.0	183.0	15.0
OTU316815125	Bacteria; Proteobacteria; Deltaproteobacteria; Syntrophobacterales; Syntrophaceae; Desulfomonile	0.0	0.0	0.0	0.0	0.0	0.0	0.0	0.0	2.0	0.0	1.0	0.0	0.0	1.0	0.0	1.0	1.0	1.0	0.0	3.0	0.0	0.0	8.0	0.0	1.0	0.0	3.0	0.0	14.0	24.0	0.0	8.0	0.0	0.0	25.0	31.0	100.0	0.0	0.0	0.0	0.0	0.0
OTU307671952	Archaea; Thaumarchaeota; Group C3; uncultured archaeon; uncultured archaeon; uncultured archaeon; uncultured archaeon	4.0	14.0	2.0	5.0	6.0	2.0	7.0	6.0	3.0	7.0	8.0	10.0	2.0	10.0	0.0	1.0	2.0	1.0	0.0	10.0	9.0	0.0	5.0	4.0	0.0	0.0	0.0	32.0	12.0	38.0	6.0	7.0	0.0	0.0	0.0	13.0	33.0	0.0	0.0	0.0	1.0	5.0
OTU751871237	Bacteria; Spirochaetae; Spirochaetes; Spirochaetales; Spirochaetaceae; uncultured; uncultured bacterium	3.0	0.0	0.0	21.0	51.0	50.0	1.0	22.0	21.0	10.0	39.0	13.0	2.0	3.0	12.0	5.0	6.0	4.0	11.0	96.0	36.0	0.0	0.0	0.0	0.0	0.0	1.0	7.0	0.0	0.0	0.0	0.0	8.0	0.0	0.0	0.0	0.0	0.0	0.0	8.0	23.0	27.0
OTU6033658	Bacteria; Proteobacteria; Alphaproteobacteria; Rhodospirillales; Rhodospirillaceae; uncultured; uncultured bacterium	0.0	0.0	0.0	0.0	0.0	1.0	0.0	0.0	0.0	0.0	0.0	0.0	0.0	2.0	0.0	0.0	2.0	0.0	2.0	0.0	0.0	0.0	0.0	0.0	0.0	212.0	0.0	0.0	0.0	0.0	0.0	0.0	0.0	0.0	0.0	0.0	0.0	0.0	0.0	0.0	0.0	6.0
OTU900922126	Bacteria; Proteobacteria; Deltaproteobacteria; Desulfobacterales; Desulfobulbaceae; Desulfobulbus	0.0	1.0	0.0	0.0	0.0	2.0	0.0	0.0	0.0	0.0	0.0	0.0	0.0	3.0	0.0	18.0	28.0	0.0	48.0	29.0	80.0	0.0	0.0	6.0	6.0	322.0	1.0	0.0	0.0	0.0	0.0	0.0	0.0	0.0	0.0	0.0	0.0	0.0	0.0	0.0	0.0	2.0
OTU88367234	Bacteria; Aminicenantes; uncultured bacterium; uncultured bacterium; uncultured bacterium; uncultured bacterium; uncultured bacterium	0.0	3.0	9.0	0.0	0.0	0.0	2.0	1.0	6.0	4.0	0.0	4.0	20.0	21.0	1.0	1.0	1.0	7.0	1.0	6.0	15.0	265.0	4.0	0.0	4.0	13.0	8.0	59.0	41.0	107.0	7.0	22.0	0.0	0.0	0.0	0.0	0.0	0.0	89.0	0.0	7.0	18.0
OTU329966086	Unassigned	6.0	3.0	2.0	2.0	1.0	1.0	6.0	4.0	9.0	5.0	5.0	8.0	31.0	21.0	19.0	5.0	3.0	3.0	62.0	43.0	62.0	0.0	10.0	8.0	1.0	0.0	6.0	29.0	0.0	31.0	1.0	0.0	0.0	0.0	0.0	0.0	0.0	0.0	0.0	6.0	10.0	9.0
OTU193677201	Bacteria; Proteobacteria; Deltaproteobacteria; Desulfobacterales; Desulfobacteraceae; Desulforegula	2.0	3.0	2.0	27.0	5.0	0.0	2.0	0.0	3.0	2.0	10.0	7.0	1.0	0.0	4.0	0.0	1.0	0.0	7.0	1.0	7.0	0.0	0.0	0.0	0.0	0.0	6.0	0.0	0.0	0.0	32.0	9.0	0.0	0.0	111.0	58.0	0.0	0.0	0.0	1.0	2.0	0.0
OTU856864705	Unassigned	0.0	2.0	0.0	0.0	0.0	0.0	25.0	68.0	109.0	0.0	0.0	0.0	72.0	31.0	9.0	2.0	19.0	6.0	31.0	95.0	16.0	0.0	0.0	14.0	0.0	0.0	0.0	0.0	19.0	0.0	4.0	0.0	0.0	0.0	0.0	0.0	0.0	1.0	0.0	0.0	11.0	149.0
OTU162148912	Bacteria; Lentisphaerae; Lentisphaeria; Victivallales; PRD18C08; uncultured bacterium; uncultured bacterium	1.0	4.0	9.0	3.0	0.0	0.0	2.0	0.0	1.0	1.0	0.0	6.0	5.0	1.0	5.0	84.0	21.0	91.0	0.0	5.0	5.0	5.0	0.0	0.0	23.0	61.0	11.0	0.0	0.0	30.0	50.0	19.0	17.0	0.0	0.0	0.0	0.0	0.0	0.0	3.0	3.0	3.0
OTU11210644	Bacteria; Omnitrophica; Omnitrophica Incertae Sedis; Unknown Order; Unknown Family; Candidatus Omnitrophus	0.0	0.0	0.0	0.0	0.0	0.0	2.0	2.0	4.0	2.0	0.0	0.0	0.0	4.0	0.0	8.0	2.0	21.0	5.0	4.0	16.0	0.0	0.0	0.0	2.0	8.0	2.0	71.0	0.0	16.0	0.0	0.0	0.0	0.0	0.0	0.0	0.0	0.0	0.0	15.0	11.0	2.0
OTU205440535	Unassigned	0.0	0.0	0.0	0.0	1.0	0.0	3.0	3.0	18.0	0.0	0.0	0.0	112.0	15.0	81.0	0.0	1.0	4.0	33.0	103.0	47.0	2.0	16.0	0.0	1.0	24.0	5.0	0.0	0.0	0.0	1.0	0.0	0.0	0.0	0.0	1.0	0.0	0.0	0.0	4.0	450.0	23.0
OTU694185827	Unassigned	0.0	0.0	0.0	0.0	1.0	0.0	30.0	1.0	22.0	31.0	3.0	7.0	22.0	0.0	60.0	0.0	0.0	0.0	13.0	6.0	25.0	0.0	0.0	0.0	0.0	0.0	0.0	0.0	0.0	0.0	1.0	0.0	0.0	0.0	0.0	2.0	0.0	0.0	0.0	68.0	31.0	0.0
OTU333585994	Bacteria; Proteobacteria; Deltaproteobacteria; FW113; uncultured organism; uncultured organism; uncultured organism	18.0	20.0	9.0	8.0	16.0	10.0	4.0	0.0	11.0	1.0	4.0	4.0	1.0	0.0	2.0	11.0	11.0	5.0	3.0	2.0	0.0	18.0	10.0	19.0	4.0	3.0	9.0	19.0	13.0	60.0	5.0	4.0	0.0	0.0	0.0	0.0	9.0	0.0	0.0	0.0	2.0	2.0
OTU155999851	Bacteria; Proteobacteria; Deltaproteobacteria; Desulfobacterales; Desulfobulbaceae; MSBL7; uncultured bacterium	16.0	1.0	0.0	2.0	11.0	1.0	31.0	29.0	202.0	55.0	103.0	26.0	131.0	3.0	86.0	2.0	0.0	1.0	143.0	9.0	12.0	0.0	2.0	0.0	0.0	0.0	0.0	0.0	0.0	0.0	88.0	151.0	34.0	0.0	0.0	23.0	0.0	0.0	0.0	348.0	661.0	0.0
OTU581835974	Bacteria; Ignavibacteriae; Ignavibacteria; Ignavibacteriales; IheB3-7; uncultured bacterium; uncultured bacterium	2.0	3.0	0.0	4.0	7.0	1.0	144.0	68.0	70.0	4.0	0.0	1.0	5.0	2.0	0.0	23.0	97.0	11.0	15.0	14.0	29.0	4.0	0.0	0.0	0.0	0.0	0.0	5.0	0.0	5.0	0.0	0.0	0.0	0.0	0.0	0.0	0.0	0.0	0.0	3.0	2.0	1.0
OTU15618395	Bacteria; Proteobacteria; Deltaproteobacteria; Syntrophobacterales; Syntrophaceae; Desulfomonile; uncultured bacterium	0.0	0.0	4.0	0.0	0.0	0.0	0.0	0.0	0.0	0.0	6.0	0.0	0.0	0.0	0.0	0.0	0.0	0.0	0.0	1.0	0.0	0.0	9.0	0.0	0.0	0.0	0.0	0.0	0.0	0.0	1.0	0.0	0.0	0.0	0.0	0.0	158.0	0.0	0.0	0.0	2.0	0.0
OTU383169501	Bacteria; Proteobacteria; Deltaproteobacteria; Desulfovibrionales; Desulfovibrionaceae; Desulfovibrio	0.0	4.0	4.0	0.0	0.0	0.0	0.0	0.0	0.0	0.0	0.0	0.0	1.0	0.0	0.0	0.0	0.0	0.0	0.0	21.0	0.0	26.0	0.0	0.0	0.0	0.0	4.0	0.0	0.0	0.0	6.0	0.0	0.0	0.0	107.0	0.0	0.0	0.0	0.0	0.0	0.0	0.0
OTU496015374	Bacteria; Proteobacteria; Deltaproteobacteria; Desulfobacterales; Desulfobulbaceae; MSBL7	0.0	0.0	0.0	0.0	0.0	0.0	3.0	0.0	1.0	0.0	0.0	0.0	3.0	23.0	1.0	22.0	6.0	30.0	14.0	36.0	56.0	0.0	0.0	0.0	0.0	18.0	0.0	0.0	0.0	0.0	8.0	4.0	0.0	0.0	0.0	0.0	0.0	0.0	0.0	0.0	0.0	9.0
OTU236071170	Bacteria; Firmicutes; Clostridia; Clostridiales; MAT-CR-H4-C10; uncultured bacterium; uncultured bacterium	159.0	17.0	8.0	12.0	1.0	8.0	2.0	0.0	10.0	7.0	60.0	0.0	0.0	0.0	0.0	0.0	0.0	2.0	10.0	2.0	89.0	0.0	5.0	26.0	1.0	0.0	1.0	98.0	20.0	74.0	1.0	0.0	0.0	0.0	0.0	19.0	0.0	0.0	0.0	8.0	5.0	0.0
OTU242425556	Bacteria; Proteobacteria; Deltaproteobacteria; Syntrophobacterales; Syntrophaceae; Smithella; uncultured bacterium	1.0	1.0	0.0	2.0	0.0	0.0	1.0	5.0	0.0	0.0	1.0	4.0	0.0	0.0	0.0	0.0	0.0	0.0	4.0	0.0	2.0	0.0	5.0	0.0	0.0	0.0	0.0	2.0	137.0	7.0	0.0	3.0	0.0	0.0	0.0	0.0	0.0	0.0	0.0	0.0	0.0	0.0
OTU578890638	Unassigned	0.0	0.0	0.0	0.0	0.0	0.0	0.0	0.0	0.0	0.0	0.0	0.0	0.0	0.0	0.0	0.0	12.0	25.0	0.0	0.0	0.0	0.0	0.0	0.0	100.0	22.0	0.0	0.0	0.0	0.0	0.0	0.0	0.0	0.0	0.0	0.0	0.0	0.0	0.0	0.0	0.0	0.0
OTU501385607	Bacteria; Firmicutes; Erysipelotrichia; Erysipelotrichales; Erysipelotrichaceae; Erysipelothrix; uncultured bacterium	39.0	11.0	47.0	7.0	88.0	44.0	180.0	25.0	40.0	8.0	10.0	151.0	29.0	1.0	3.0	12.0	27.0	1.0	14.0	59.0	23.0	45.0	308.0	16.0	83.0	93.0	115.0	314.0	573.0	430.0	144.0	231.0	99.0	0.0	229.0	66.0	37.0	251.0	502.0	5.0	78.0	10.0
OTU280424804	Unassigned	1.0	5.0	1.0	0.0	0.0	0.0	2.0	4.0	4.0	6.0	2.0	12.0	3.0	13.0	5.0	1.0	0.0	1.0	10.0	18.0	24.0	2.0	0.0	4.0	0.0	0.0	0.0	0.0	6.0	0.0	2.0	4.0	0.0	0.0	8.0	0.0	0.0	0.0	0.0	6.0	6.0	2.0
OTU359945789	Unassigned	0.0	4.0	1.0	0.0	1.0	1.0	3.0	1.0	2.0	5.0	3.0	0.0	0.0	0.0	5.0	0.0	1.0	0.0	17.0	30.0	8.0	0.0	6.0	4.0	0.0	0.0	0.0	7.0	5.0	11.0	0.0	0.0	0.0	0.0	0.0	0.0	0.0	0.0	0.0	3.0	30.0	16.0
OTU222196911	Bacteria; Bacteroidetes; Bacteroidetes BD2-2	0.0	2.0	0.0	0.0	0.0	0.0	0.0	0.0	0.0	0.0	0.0	1.0	6.0	1.0	0.0	10.0	0.0	3.0	0.0	0.0	5.0	11.0	0.0	0.0	54.0	63.0	24.0	0.0	0.0	0.0	10.0	0.0	0.0	0.0	0.0	0.0	0.0	0.0	0.0	0.0	12.0	4.0
OTU7368887	Bacteria; Nitrospirae; Nitrospira; Nitrospirales; FW13; uncultured bacterium; uncultured bacterium	0.0	0.0	0.0	0.0	0.0	0.0	0.0	0.0	0.0	0.0	0.0	0.0	0.0	0.0	0.0	47.0	0.0	15.0	0.0	0.0	0.0	0.0	0.0	0.0	18.0	220.0	1.0	0.0	0.0	0.0	0.0	0.0	0.0	0.0	0.0	0.0	0.0	0.0	0.0	0.0	0.0	0.0
OTU84648543	Bacteria; Chloroflexi; Anaerolineae; Anaerolineales; Anaerolineaceae; uncultured; uncultured bacterium	14.0	8.0	13.0	2.0	1.0	1.0	5.0	9.0	31.0	21.0	8.0	3.0	60.0	34.0	18.0	15.0	0.0	11.0	29.0	85.0	25.0	9.0	4.0	5.0	27.0	30.0	9.0	20.0	62.0	22.0	14.0	16.0	7.0	0.0	63.0	77.0	0.0	0.0	0.0	39.0	26.0	13.0
OTU419286061	Unassigned	0.0	18.0	29.0	0.0	3.0	0.0	0.0	0.0	0.0	0.0	0.0	29.0	0.0	52.0	24.0	14.0	10.0	33.0	4.0	66.0	89.0	13.0	31.0	49.0	9.0	46.0	11.0	0.0	60.0	5.0	68.0	0.0	0.0	0.0	0.0	29.0	0.0	0.0	0.0	0.0	4.0	26.0
OTU978478697	Unassigned	22.0	3.0	23.0	71.0	21.0	36.0	13.0	19.0	39.0	10.0	101.0	33.0	9.0	4.0	5.0	0.0	0.0	2.0	4.0	13.0	4.0	87.0	25.0	13.0	4.0	24.0	13.0	59.0	37.0	58.0	236.0	3.0	0.0	0.0	120.0	41.0	0.0	0.0	0.0	52.0	226.0	53.0
OTU822186023	Bacteria; Proteobacteria; Deltaproteobacteria; Desulfobacterales; Desulfobulbaceae; Desulfurivibrio; uncultured bacterium	0.0	0.0	0.0	0.0	0.0	0.0	0.0	0.0	3.0	0.0	0.0	0.0	2.0	2.0	4.0	0.0	6.0	0.0	4.0	0.0	0.0	0.0	0.0	0.0	82.0	0.0	97.0	0.0	0.0	0.0	16.0	0.0	0.0	0.0	0.0	0.0	0.0	0.0	0.0	0.0	2.0	0.0
OTU183305218	Bacteria; Nitrospirae; Nitrospira; Nitrospirales; Sh765B-TzT-35; uncultured bacterium; uncultured bacterium	15.0	36.0	4.0	6.0	2.0	2.0	25.0	15.0	36.0	7.0	20.0	13.0	8.0	21.0	4.0	5.0	6.0	5.0	43.0	19.0	21.0	0.0	9.0	4.0	0.0	0.0	0.0	19.0	24.0	18.0	15.0	4.0	3.0	0.0	0.0	26.0	0.0	0.0	39.0	16.0	32.0	15.0
OTU763662842	Bacteria; Chloroflexi; Anaerolineae; Anaerolineales; Anaerolineaceae; uncultured; uncultured bacterium	2.0	4.0	2.0	2.0	0.0	0.0	0.0	2.0	3.0	2.0	1.0	0.0	11.0	5.0	2.0	74.0	20.0	1.0	2.0	30.0	6.0	7.0	3.0	1.0	4.0	14.0	1.0	2.0	19.0	11.0	2.0	6.0	0.0	0.0	0.0	0.0	0.0	0.0	0.0	8.0	15.0	3.0
OTU739008566	Unassigned	8.0	0.0	11.0	11.0	23.0	18.0	9.0	8.0	17.0	3.0	0.0	0.0	0.0	0.0	1.0	4.0	22.0	5.0	1.0	0.0	9.0	0.0	2.0	8.0	0.0	0.0	0.0	2.0	0.0	0.0	0.0	0.0	0.0	0.0	0.0	0.0	0.0	0.0	0.0	0.0	1.0	0.0
OTU164562796	Bacteria; Parcubacteria; uncultured bacterium; uncultured bacterium; uncultured bacterium; uncultured bacterium; uncultured bacterium	0.0	0.0	0.0	0.0	0.0	0.0	0.0	2.0	4.0	0.0	0.0	0.0	46.0	5.0	20.0	13.0	20.0	12.0	12.0	77.0	92.0	0.0	0.0	0.0	3.0	9.0	3.0	0.0	0.0	0.0	0.0	0.0	0.0	0.0	0.0	0.0	0.0	0.0	0.0	0.0	7.0	0.0
OTU317282067	Unassigned	0.0	0.0	0.0	0.0	0.0	0.0	4.0	4.0	9.0	0.0	0.0	12.0	189.0	2.0	4.0	0.0	0.0	0.0	2.0	0.0	0.0	0.0	9.0	211.0	0.0	0.0	0.0	0.0	18.0	0.0	15.0	0.0	0.0	0.0	0.0	0.0	0.0	0.0	0.0	4.0	176.0	1.0
OTU573728417	Bacteria; Nitrospinae; Belgica2005-10-ZG-3; Ambiguous_taxa; Ambiguous_taxa; Ambiguous_taxa; Ambiguous_taxa	0.0	0.0	0.0	0.0	0.0	0.0	0.0	0.0	0.0	0.0	1.0	0.0	77.0	80.0	22.0	0.0	11.0	0.0	0.0	0.0	0.0	0.0	0.0	0.0	1.0	1.0	0.0	0.0	0.0	0.0	0.0	0.0	0.0	0.0	0.0	0.0	0.0	0.0	0.0	0.0	0.0	0.0
OTU914839002	Bacteria; Proteobacteria; Deltaproteobacteria; Desulfobacterales; Desulfobacteraceae	14.0	53.0	12.0	9.0	19.0	5.0	20.0	10.0	11.0	10.0	4.0	0.0	0.0	0.0	3.0	0.0	1.0	3.0	13.0	8.0	8.0	28.0	53.0	38.0	0.0	0.0	5.0	58.0	94.0	153.0	41.0	6.0	12.0	1.0	72.0	39.0	0.0	0.0	0.0	3.0	3.0	13.0
OTU526398972	Bacteria; Omnitrophica; uncultured bacterium; uncultured bacterium; uncultured bacterium; uncultured bacterium; uncultured bacterium	0.0	0.0	0.0	0.0	2.0	0.0	13.0	46.0	219.0	1.0	0.0	0.0	47.0	7.0	35.0	3.0	1.0	8.0	42.0	19.0	15.0	0.0	0.0	0.0	0.0	0.0	1.0	0.0	0.0	0.0	0.0	0.0	0.0	0.0	0.0	12.0	0.0	0.0	0.0	203.0	219.0	7.0
OTU578915600	Bacteria; Proteobacteria; Betaproteobacteria; Burkholderiales; Burkholderiaceae; Polynucleobacter	0.0	5.0	43.0	38.0	35.0	15.0	1.0	2.0	4.0	0.0	2.0	10.0	3.0	8.0	1.0	0.0	0.0	0.0	0.0	0.0	0.0	42.0	142.0	58.0	2.0	5.0	3.0	185.0	235.0	365.0	0.0	0.0	0.0	0.0	0.0	0.0	0.0	0.0	0.0	0.0	1.0	4.0
OTU983277563	Bacteria; Ignavibacteriae; Ignavibacteria; Ignavibacteriales; BSV40; uncultured bacterium; uncultured bacterium	0.0	0.0	0.0	0.0	0.0	0.0	0.0	0.0	0.0	0.0	0.0	0.0	0.0	0.0	0.0	0.0	0.0	0.0	0.0	0.0	0.0	50.0	21.0	11.0	0.0	0.0	0.0	0.0	0.0	0.0	0.0	0.0	0.0	0.0	0.0	3.0	0.0	0.0	0.0	37.0	393.0	106.0
OTU180077941	Bacteria; Proteobacteria; Deltaproteobacteria; Desulfobacterales; Desulfobulbaceae; uncultured; uncultured bacterium	0.0	1.0	0.0	1.0	0.0	0.0	0.0	0.0	0.0	0.0	0.0	0.0	1.0	0.0	0.0	43.0	4.0	23.0	0.0	0.0	0.0	25.0	4.0	0.0	9.0	20.0	1.0	0.0	0.0	11.0	93.0	0.0	0.0	0.0	0.0	0.0	0.0	0.0	0.0	1.0	0.0	0.0
OTU298027674	Bacteria; Omnitrophica; Ambiguous_taxa; Ambiguous_taxa; Ambiguous_taxa; Ambiguous_taxa; Ambiguous_taxa	0.0	8.0	7.0	3.0	0.0	2.0	9.0	0.0	0.0	34.0	4.0	9.0	48.0	34.0	14.0	8.0	4.0	4.0	52.0	59.0	43.0	7.0	9.0	21.0	1.0	3.0	0.0	0.0	33.0	34.0	33.0	3.0	0.0	0.0	0.0	0.0	38.0	0.0	0.0	0.0	4.0	4.0
OTU159639672	Bacteria; Proteobacteria; Deltaproteobacteria; SAR324 clade(Marine group B)	1.0	0.0	0.0	1.0	0.0	0.0	8.0	2.0	11.0	9.0	7.0	0.0	1.0	0.0	0.0	0.0	2.0	1.0	6.0	1.0	0.0	0.0	1.0	10.0	0.0	5.0	6.0	32.0	23.0	63.0	0.0	0.0	0.0	0.0	52.0	0.0	0.0	0.0	0.0	0.0	0.0	0.0
OTU528797966	Bacteria; Proteobacteria; Deltaproteobacteria; Syntrophobacterales; Syntrophobacteraceae; Desulfovirga	11.0	16.0	6.0	1.0	0.0	4.0	10.0	6.0	18.0	7.0	11.0	13.0	4.0	12.0	4.0	2.0	0.0	1.0	15.0	2.0	4.0	30.0	17.0	9.0	3.0	10.0	14.0	28.0	36.0	28.0	11.0	4.0	17.0	0.0	0.0	0.0	0.0	0.0	0.0	5.0	4.0	3.0
OTU850814344	Bacteria; Acidobacteria; Holophagae; Holophagales; Holophagaceae; uncultured; uncultured bacterium	9.0	0.0	0.0	0.0	0.0	0.0	0.0	0.0	3.0	0.0	7.0	4.0	0.0	0.0	1.0	0.0	0.0	0.0	0.0	0.0	0.0	37.0	129.0	22.0	0.0	0.0	0.0	0.0	0.0	8.0	0.0	0.0	0.0	0.0	0.0	0.0	0.0	0.0	0.0	0.0	0.0	4.0
OTU707199044	Bacteria; Microgenomates; Candidatus Collierbacteria	53.0	7.0	100.0	3.0	0.0	0.0	5.0	3.0	1.0	2.0	0.0	0.0	68.0	54.0	40.0	19.0	28.0	25.0	9.0	71.0	41.0	6.0	2.0	4.0	6.0	21.0	11.0	0.0	0.0	11.0	5.0	0.0	0.0	0.0	12.0	0.0	1.0	0.0	0.0	8.0	22.0	11.0
OTU450427123	Bacteria; Proteobacteria; Deltaproteobacteria; Desulfobacterales; Desulfobacteraceae; uncultured; uncultured bacterium	0.0	0.0	0.0	0.0	0.0	0.0	0.0	0.0	0.0	0.0	0.0	0.0	0.0	0.0	0.0	133.0	77.0	601.0	0.0	0.0	0.0	0.0	0.0	0.0	0.0	891.0	0.0	0.0	0.0	0.0	0.0	0.0	0.0	1.0	0.0	0.0	0.0	0.0	0.0	0.0	0.0	0.0
OTU725132011	Bacteria; Proteobacteria; Deltaproteobacteria; Bdellovibrionales; Bacteriovoracaceae; uncultured; uncultured delta proteobacterium	0.0	0.0	6.0	0.0	0.0	0.0	12.0	24.0	2.0	2.0	5.0	0.0	6.0	3.0	1.0	2.0	6.0	7.0	0.0	3.0	0.0	0.0	0.0	0.0	0.0	1.0	1.0	0.0	0.0	86.0	6.0	0.0	24.0	0.0	21.0	0.0	0.0	0.0	0.0	0.0	0.0	1.0
OTU919703893	Bacteria; Bacteroidetes; Flavobacteriia; Flavobacteriales; Flavobacteriaceae; Flavobacterium; Ambiguous_taxa	57.0	20.0	6.0	2.0	0.0	0.0	0.0	0.0	2.0	8.0	8.0	10.0	0.0	4.0	0.0	0.0	0.0	0.0	0.0	0.0	0.0	84.0	115.0	295.0	0.0	34.0	3.0	686.0	427.0	1807.0	13.0	0.0	0.0	0.0	0.0	0.0	47.0	0.0	0.0	1.0	0.0	1.0
OTU659375517	Bacteria; Planctomycetes; Planctomycetacia; Planctomycetales; Planctomycetaceae; uncultured; uncultured bacterium	8.0	1.0	9.0	3.0	1.0	1.0	7.0	5.0	6.0	3.0	4.0	1.0	3.0	5.0	0.0	1.0	3.0	3.0	1.0	0.0	9.0	0.0	14.0	5.0	5.0	3.0	31.0	45.0	19.0	32.0	7.0	11.0	0.0	0.0	0.0	0.0	15.0	0.0	4.0	8.0	0.0	1.0
OTU76001842	Bacteria; CPR2; uncultured bacterium; uncultured bacterium; uncultured bacterium; uncultured bacterium; uncultured bacterium	0.0	1.0	0.0	0.0	2.0	0.0	2.0	2.0	0.0	0.0	0.0	0.0	25.0	18.0	18.0	0.0	3.0	78.0	1.0	2.0	59.0	0.0	0.0	0.0	0.0	0.0	2.0	0.0	0.0	0.0	0.0	0.0	0.0	0.0	0.0	0.0	0.0	0.0	28.0	0.0	5.0	27.0
OTU776803002	Bacteria; Spirochaetae; Spirochaetes; Spirochaetales; Spirochaetaceae; Spirochaeta 2	4.0	0.0	0.0	0.0	1.0	3.0	4.0	0.0	1.0	6.0	2.0	3.0	1.0	0.0	2.0	8.0	18.0	9.0	10.0	0.0	1.0	0.0	16.0	0.0	11.0	2.0	2.0	16.0	0.0	13.0	10.0	0.0	0.0	0.0	0.0	0.0	0.0	0.0	0.0	0.0	7.0	7.0
OTU358792818	Bacteria; Proteobacteria; Deltaproteobacteria; Desulfobacterales; Desulfobulbaceae	0.0	0.0	0.0	1.0	5.0	0.0	22.0	36.0	191.0	2.0	7.0	1.0	156.0	2.0	49.0	0.0	0.0	0.0	121.0	5.0	11.0	0.0	0.0	0.0	0.0	0.0	3.0	0.0	0.0	0.0	107.0	229.0	58.0	0.0	0.0	5.0	0.0	0.0	0.0	91.0	305.0	0.0
OTU45643382	Bacteria; Proteobacteria; Betaproteobacteria; Nitrosomonadales; Nitrosomonadaceae	0.0	0.0	0.0	0.0	0.0	0.0	0.0	0.0	0.0	0.0	0.0	0.0	0.0	0.0	0.0	4.0	0.0	0.0	0.0	0.0	0.0	0.0	0.0	0.0	99.0	1973.0	3.0	0.0	0.0	0.0	2.0	0.0	0.0	0.0	0.0	0.0	0.0	0.0	0.0	0.0	0.0	0.0
OTU758035948	Bacteria; Ignavibacteriae; Ignavibacteria; Ignavibacteriales; IheB3-7; Ambiguous_taxa; Ambiguous_taxa	8.0	7.0	13.0	9.0	1.0	5.0	4.0	6.0	14.0	40.0	33.0	8.0	5.0	7.0	3.0	1.0	0.0	0.0	55.0	19.0	12.0	10.0	15.0	15.0	3.0	4.0	10.0	5.0	17.0	51.0	31.0	15.0	11.0	0.0	52.0	0.0	77.0	2.0	0.0	41.0	48.0	6.0
OTU718487302	Bacteria; Ignavibacteriae; Ignavibacteria; Ignavibacteriales; SR-FBR-L83; uncultured bacterium; uncultured bacterium	209.0	36.0	0.0	0.0	0.0	0.0	2.0	0.0	0.0	36.0	17.0	0.0	0.0	0.0	0.0	0.0	0.0	0.0	0.0	0.0	1.0	0.0	0.0	0.0	0.0	2.0	0.0	188.0	0.0	41.0	0.0	1.0	0.0	0.0	0.0	0.0	0.0	0.0	0.0	1.0	0.0	0.0
OTU525877081	Bacteria; Proteobacteria; Deltaproteobacteria; Desulfarculales; Desulfarculaceae; Desulfatiglans	18.0	1.0	2.0	2.0	1.0	2.0	1.0	2.0	4.0	5.0	1.0	0.0	1.0	1.0	2.0	9.0	9.0	7.0	1.0	3.0	4.0	9.0	0.0	7.0	0.0	5.0	5.0	42.0	21.0	64.0	9.0	9.0	0.0	0.0	0.0	0.0	91.0	0.0	0.0	8.0	3.0	0.0
OTU107928077	Bacteria; Proteobacteria; Deltaproteobacteria; Desulfobacterales; Desulfobulbaceae; Desulfobulbus; uncultured bacterium	0.0	0.0	0.0	0.0	0.0	0.0	0.0	0.0	0.0	0.0	0.0	0.0	0.0	1.0	0.0	0.0	0.0	0.0	0.0	0.0	0.0	0.0	0.0	0.0	2.0	145.0	0.0	0.0	0.0	0.0	1.0	0.0	0.0	0.0	0.0	0.0	0.0	0.0	0.0	0.0	0.0	0.0
OTU946052601	Bacteria; Proteobacteria; Deltaproteobacteria; Desulfobacterales; Desulfobacteraceae; uncultured; Ambiguous_taxa	10.0	35.0	22.0	0.0	6.0	6.0	12.0	14.0	10.0	7.0	6.0	7.0	24.0	12.0	2.0	6.0	5.0	0.0	23.0	14.0	20.0	27.0	9.0	29.0	3.0	9.0	2.0	10.0	64.0	0.0	54.0	6.0	22.0	0.0	23.0	0.0	0.0	0.0	33.0	6.0	9.0	7.0
OTU928701059	Bacteria; Bacteroidetes; Bacteroidia; Bacteroidia Incertae Sedis; Draconibacteriaceae	0.0	0.0	0.0	0.0	0.0	0.0	0.0	0.0	0.0	0.0	0.0	0.0	1.0	3.0	0.0	4.0	0.0	1.0	0.0	0.0	8.0	0.0	0.0	0.0	0.0	82.0	0.0	0.0	0.0	0.0	0.0	0.0	0.0	0.0	0.0	0.0	0.0	0.0	42.0	2.0	9.0	1.0
OTU800886205	Bacteria; Proteobacteria; Deltaproteobacteria; Desulfobacterales; Desulfobulbaceae; Desulfocapsa	14.0	0.0	0.0	1.0	5.0	1.0	5.0	13.0	38.0	9.0	12.0	5.0	2.0	0.0	1.0	0.0	0.0	0.0	30.0	2.0	6.0	0.0	0.0	0.0	0.0	0.0	0.0	0.0	0.0	0.0	1.0	8.0	2.0	0.0	0.0	4.0	0.0	0.0	0.0	120.0	91.0	0.0
OTU88921723	Bacteria; Elusimicrobia; Elusimicrobia; Lineage IV; uncultured bacterium; uncultured bacterium; uncultured bacterium	7.0	5.0	0.0	0.0	4.0	0.0	0.0	0.0	0.0	0.0	2.0	1.0	27.0	5.0	3.0	0.0	0.0	0.0	0.0	14.0	2.0	4.0	9.0	8.0	0.0	0.0	0.0	17.0	9.0	7.0	10.0	0.0	13.0	0.0	0.0	10.0	0.0	0.0	0.0	0.0	0.0	2.0
OTU302750148	Bacteria; Proteobacteria; Deltaproteobacteria; 43F-1404R; Ambiguous_taxa; Ambiguous_taxa; Ambiguous_taxa	0.0	0.0	0.0	1.0	0.0	0.0	0.0	0.0	0.0	0.0	7.0	10.0	0.0	1.0	0.0	1.0	1.0	4.0	0.0	0.0	1.0	34.0	21.0	15.0	2.0	5.0	0.0	28.0	16.0	0.0	0.0	0.0	0.0	0.0	0.0	0.0	0.0	0.0	0.0	6.0	6.0	8.0
OTU726912388	Unassigned	2.0	4.0	13.0	4.0	0.0	0.0	3.0	19.0	27.0	15.0	18.0	13.0	84.0	49.0	10.0	0.0	2.0	6.0	49.0	114.0	151.0	2.0	0.0	4.0	0.0	0.0	0.0	0.0	9.0	0.0	19.0	1.0	0.0	0.0	0.0	1.0	0.0	0.0	0.0	29.0	44.0	6.0
OTU832501175	Bacteria; Proteobacteria; Deltaproteobacteria; Desulfovibrionales; Desulfovibrionaceae; Desulfovibrio	11.0	0.0	10.0	3.0	3.0	0.0	1.0	2.0	8.0	39.0	61.0	4.0	10.0	0.0	1.0	0.0	0.0	1.0	0.0	7.0	0.0	1.0	22.0	7.0	0.0	0.0	0.0	0.0	0.0	15.0	0.0	382.0	522.0	0.0	0.0	93.0	0.0	0.0	0.0	117.0	141.0	0.0
OTU322062080	Bacteria; Proteobacteria; Deltaproteobacteria; Desulfobacterales; Desulfobacteraceae	3.0	3.0	1.0	0.0	1.0	0.0	2.0	0.0	6.0	0.0	0.0	0.0	6.0	0.0	0.0	2.0	1.0	3.0	5.0	2.0	1.0	0.0	7.0	5.0	4.0	3.0	2.0	17.0	0.0	16.0	5.0	0.0	0.0	0.0	0.0	3.0	0.0	9.0	130.0	5.0	1.0	0.0
OTU245327868	Bacteria; Omnitrophica; uncultured bacterium; uncultured bacterium; uncultured bacterium; uncultured bacterium; uncultured bacterium	0.0	0.0	0.0	0.0	1.0	0.0	1.0	0.0	0.0	0.0	0.0	0.0	2.0	2.0	0.0	0.0	0.0	0.0	17.0	86.0	0.0	0.0	0.0	0.0	0.0	0.0	0.0	0.0	0.0	0.0	0.0	0.0	0.0	0.0	0.0	1.0	0.0	0.0	0.0	51.0	38.0	0.0
OTU188854578	Bacteria; Parcubacteria; uncultured bacterium; uncultured bacterium; uncultured bacterium; uncultured bacterium; uncultured bacterium	0.0	1.0	0.0	0.0	0.0	0.0	10.0	8.0	17.0	0.0	0.0	0.0	34.0	11.0	18.0	3.0	0.0	8.0	36.0	155.0	12.0	0.0	0.0	0.0	0.0	0.0	0.0	2.0	4.0	0.0	2.0	0.0	0.0	0.0	0.0	0.0	0.0	0.0	0.0	0.0	0.0	0.0
OTU518797073	Bacteria; Aminicenantes	5.0	0.0	5.0	0.0	3.0	0.0	0.0	5.0	5.0	17.0	34.0	0.0	10.0	3.0	4.0	1.0	0.0	0.0	19.0	7.0	13.0	12.0	0.0	0.0	0.0	1.0	0.0	0.0	30.0	43.0	1.0	1.0	12.0	0.0	0.0	1.0	0.0	0.0	0.0	7.0	16.0	6.0
OTU599222156	Bacteria; Proteobacteria; Deltaproteobacteria; Desulfobacterales; Desulfobacteraceae; uncultured; uncultured bacterium	1.0	11.0	5.0	3.0	1.0	0.0	2.0	6.0	1.0	7.0	5.0	11.0	5.0	3.0	0.0	0.0	4.0	2.0	21.0	7.0	5.0	12.0	11.0	19.0	1.0	0.0	1.0	0.0	52.0	0.0	11.0	3.0	0.0	0.0	0.0	0.0	34.0	0.0	0.0	3.0	1.0	5.0
OTU104036935	Archaea; Euryarchaeota; Methanomicrobia; Methanosarcinales; GOM Arc I; Candidatus Methanoperedens; uncultured archaeon	0.0	0.0	0.0	0.0	0.0	0.0	0.0	0.0	0.0	0.0	0.0	0.0	0.0	0.0	0.0	33.0	5.0	30.0	1.0	0.0	0.0	0.0	0.0	0.0	8.0	1559.0	0.0	0.0	0.0	0.0	0.0	0.0	0.0	0.0	0.0	0.0	0.0	0.0	0.0	0.0	0.0	0.0
OTU65610042	Bacteria; Nitrospinae; MD2898-B26; uncultured bacterium; uncultured bacterium; uncultured bacterium; uncultured bacterium	0.0	3.0	1.0	0.0	3.0	0.0	127.0	18.0	115.0	1.0	0.0	1.0	158.0	7.0	11.0	5.0	8.0	8.0	13.0	182.0	43.0	0.0	2.0	0.0	0.0	0.0	0.0	0.0	0.0	0.0	0.0	0.0	0.0	0.0	0.0	4.0	0.0	0.0	0.0	64.0	305.0	6.0
OTU887980012	Bacteria; Proteobacteria; Deltaproteobacteria; Desulfarculales; Desulfarculaceae; Desulfatiglans	36.0	19.0	11.0	15.0	0.0	4.0	6.0	3.0	11.0	17.0	35.0	17.0	0.0	15.0	4.0	1.0	0.0	1.0	26.0	4.0	8.0	40.0	57.0	63.0	1.0	2.0	2.0	62.0	37.0	107.0	30.0	8.0	35.0	0.0	40.0	24.0	31.0	100.0	0.0	11.0	12.0	6.0
OTU421535497	Bacteria; Aminicenantes; uncultured bacterium; uncultured bacterium; uncultured bacterium; uncultured bacterium; uncultured bacterium	59.0	0.0	16.0	0.0	0.0	0.0	0.0	2.0	0.0	61.0	201.0	71.0	0.0	0.0	0.0	0.0	0.0	0.0	1.0	0.0	0.0	0.0	36.0	172.0	0.0	0.0	0.0	89.0	3.0	51.0	0.0	1.0	0.0	0.0	0.0	0.0	0.0	0.0	0.0	3.0	0.0	0.0
OTU460115399	Bacteria; Chloroflexi; Anaerolineae; Anaerolineales; Anaerolineaceae	5.0	13.0	1.0	0.0	0.0	0.0	3.0	1.0	5.0	3.0	4.0	1.0	0.0	0.0	0.0	4.0	5.0	7.0	2.0	4.0	3.0	5.0	8.0	11.0	1.0	2.0	2.0	12.0	12.0	19.0	0.0	0.0	0.0	0.0	34.0	0.0	0.0	0.0	0.0	0.0	0.0	0.0
OTU642056160	Bacteria; Proteobacteria; Betaproteobacteria; Rhodocyclales; Rhodocyclaceae; Ferribacterium; uncultured bacterium	2.0	0.0	142.0	2.0	0.0	0.0	14.0	0.0	0.0	0.0	0.0	0.0	0.0	0.0	4.0	0.0	2.0	14.0	0.0	0.0	1.0	20.0	18.0	0.0	0.0	1.0	1.0	4.0	0.0	16.0	5.0	0.0	0.0	0.0	0.0	0.0	0.0	0.0	0.0	0.0	0.0	0.0
OTU690214290	Bacteria; Proteobacteria; Deltaproteobacteria; FW113	0.0	0.0	2.0	0.0	1.0	1.0	9.0	5.0	12.0	0.0	1.0	2.0	3.0	0.0	0.0	3.0	6.0	10.0	0.0	10.0	2.0	0.0	3.0	13.0	11.0	11.0	97.0	0.0	0.0	0.0	3.0	0.0	6.0	0.0	0.0	0.0	0.0	0.0	0.0	3.0	6.0	5.0
OTU463275808	Bacteria; Proteobacteria; Deltaproteobacteria; Bdellovibrionales; Bdellovibrionaceae; OM27 clade; uncultured bacterium	0.0	2.0	3.0	1.0	1.0	2.0	6.0	6.0	18.0	5.0	0.0	0.0	30.0	45.0	15.0	21.0	10.0	25.0	98.0	102.0	29.0	0.0	0.0	0.0	1.0	0.0	3.0	0.0	0.0	0.0	0.0	0.0	0.0	0.0	0.0	0.0	0.0	0.0	0.0	6.0	1.0	18.0
OTU615617659	Bacteria; Bacteroidetes; Bacteroidetes VC2.1 Bac22; uncultured bacterium; uncultured bacterium; uncultured bacterium; uncultured bacterium	66.0	62.0	43.0	240.0	112.0	94.0	119.0	288.0	475.0	285.0	419.0	355.0	189.0	105.0	84.0	19.0	12.0	25.0	569.0	607.0	231.0	8.0	228.0	35.0	3.0	6.0	563.0	819.0	921.0	107.0	299.0	108.0	95.0	0.0	364.0	93.0	111.0	375.0	532.0	312.0	617.0	318.0
OTU776255262	Unassigned	1.0	2.0	0.0	0.0	0.0	2.0	3.0	5.0	2.0	0.0	4.0	0.0	0.0	0.0	2.0	0.0	4.0	9.0	0.0	4.0	1.0	4.0	4.0	0.0	1.0	1.0	32.0	0.0	46.0	5.0	0.0	0.0	0.0	0.0	0.0	19.0	0.0	0.0	0.0	0.0	0.0	0.0
OTU522066910	Bacteria; Proteobacteria; Deltaproteobacteria; Desulfobacterales; Desulfobacteraceae; SEEP-SRB1	3.0	13.0	7.0	17.0	14.0	3.0	5.0	1.0	8.0	0.0	5.0	6.0	21.0	21.0	7.0	0.0	1.0	2.0	15.0	14.0	28.0	7.0	1.0	1.0	0.0	0.0	0.0	0.0	0.0	0.0	29.0	0.0	0.0	0.0	51.0	0.0	0.0	0.0	0.0	3.0	8.0	3.0
OTU592430925	Bacteria; Proteobacteria; Deltaproteobacteria; Syntrophobacterales; Syntrophaceae; Desulfomonile	3.0	0.0	1.0	0.0	0.0	0.0	2.0	0.0	2.0	7.0	4.0	0.0	0.0	5.0	3.0	8.0	21.0	64.0	2.0	0.0	0.0	0.0	6.0	5.0	37.0	33.0	20.0	6.0	25.0	7.0	25.0	0.0	0.0	0.0	0.0	0.0	156.0	0.0	0.0	0.0	0.0	1.0
OTU999234010	Unassigned	0.0	0.0	0.0	0.0	0.0	1.0	9.0	3.0	15.0	18.0	1.0	3.0	3.0	5.0	0.0	0.0	20.0	0.0	2.0	398.0	12.0	0.0	0.0	0.0	0.0	0.0	0.0	0.0	0.0	0.0	0.0	0.0	0.0	0.0	0.0	2.0	0.0	0.0	0.0	22.0	11.0	11.0
OTU412032662	Bacteria; Proteobacteria; Deltaproteobacteria; Desulfobacterales; Desulfobulbaceae; uncultured; uncultured bacterium	1.0	6.0	1.0	0.0	0.0	0.0	0.0	0.0	0.0	1.0	0.0	3.0	0.0	0.0	0.0	0.0	0.0	0.0	0.0	0.0	0.0	0.0	10.0	13.0	0.0	1.0	2.0	92.0	0.0	29.0	0.0	0.0	0.0	0.0	0.0	0.0	0.0	0.0	0.0	1.0	0.0	0.0
OTU776680604	Bacteria; Lentisphaerae; Oligosphaeria; Oligosphaerales; MVP-94; uncultured organism; uncultured organism	3.0	13.0	3.0	4.0	2.0	2.0	55.0	35.0	100.0	3.0	1.0	3.0	81.0	29.0	44.0	6.0	10.0	17.0	51.0	153.0	91.0	12.0	13.0	10.0	1.0	2.0	11.0	1.0	49.0	16.0	7.0	9.0	1.0	0.0	0.0	7.0	0.0	0.0	0.0	39.0	74.0	40.0
OTU408548359	Unassigned	1.0	0.0	3.0	0.0	2.0	5.0	16.0	22.0	0.0	3.0	3.0	1.0	0.0	9.0	0.0	3.0	4.0	2.0	0.0	1.0	0.0	1.0	19.0	16.0	0.0	0.0	118.0	15.0	272.0	0.0	0.0	0.0	0.0	0.0	0.0	0.0	0.0	0.0	1.0	0.0	0.0	2.0
OTU867624203	Bacteria; Proteobacteria; Deltaproteobacteria; Desulfarculales; Desulfarculaceae; uncultured; uncultured bacterium	0.0	1.0	0.0	1.0	0.0	0.0	13.0	2.0	7.0	0.0	1.0	0.0	21.0	2.0	0.0	23.0	70.0	90.0	0.0	2.0	5.0	7.0	0.0	0.0	18.0	8.0	4.0	3.0	1.0	6.0	13.0	0.0	5.0	0.0	0.0	2.0	0.0	0.0	0.0	3.0	2.0	3.0
OTU671637544	Bacteria; Omnitrophica; uncultured bacterium; uncultured bacterium; uncultured bacterium; uncultured bacterium; uncultured bacterium	2.0	2.0	2.0	1.0	1.0	1.0	0.0	0.0	5.0	32.0	19.0	0.0	1.0	20.0	0.0	3.0	3.0	3.0	8.0	0.0	3.0	11.0	38.0	10.0	0.0	1.0	0.0	98.0	63.0	17.0	13.0	16.0	9.0	0.0	0.0	0.0	0.0	0.0	0.0	2.0	5.0	2.0
OTU30109295	Unassigned	0.0	0.0	0.0	0.0	0.0	0.0	3.0	1.0	24.0	0.0	0.0	0.0	34.0	12.0	0.0	1.0	8.0	14.0	2.0	1.0	28.0	0.0	0.0	0.0	0.0	4.0	1.0	0.0	0.0	9.0	7.0	0.0	0.0	0.0	0.0	0.0	0.0	0.0	0.0	0.0	0.0	4.0
OTU754307232	Bacteria; Ignavibacteriae; Ignavibacteria; Ignavibacteriales; IheB3-7; Ambiguous_taxa; Ambiguous_taxa	14.0	7.0	5.0	0.0	0.0	2.0	4.0	1.0	6.0	2.0	1.0	3.0	0.0	0.0	1.0	2.0	4.0	15.0	0.0	0.0	3.0	397.0	92.0	32.0	12.0	8.0	0.0	265.0	110.0	63.0	0.0	4.0	0.0	0.0	0.0	0.0	0.0	0.0	0.0	2.0	1.0	0.0
OTU514037666	Bacteria; Aminicenantes	1.0	5.0	5.0	6.0	1.0	0.0	0.0	0.0	0.0	0.0	1.0	0.0	0.0	12.0	0.0	0.0	47.0	5.0	0.0	8.0	30.0	0.0	0.0	1.0	0.0	0.0	2.0	34.0	35.0	74.0	0.0	0.0	0.0	0.0	0.0	0.0	0.0	0.0	0.0	1.0	0.0	0.0
OTU81532760	Bacteria; Firmicutes; Clostridia; Halanaerobiales; ODP1230B8.23; uncultured bacterium; uncultured bacterium	4.0	0.0	0.0	0.0	2.0	0.0	16.0	83.0	49.0	9.0	47.0	20.0	0.0	3.0	1.0	0.0	0.0	1.0	0.0	3.0	3.0	13.0	39.0	81.0	0.0	2.0	0.0	13.0	0.0	0.0	22.0	26.0	0.0	0.0	0.0	1.0	24.0	0.0	0.0	35.0	51.0	35.0
OTU938248323	Bacteria; Proteobacteria; Alphaproteobacteria; Rhodobacterales; Rhodobacteraceae	5.0	15.0	43.0	11.0	18.0	0.0	0.0	0.0	0.0	1.0	3.0	2.0	0.0	0.0	0.0	0.0	0.0	0.0	0.0	0.0	0.0	126.0	35.0	166.0	0.0	1.0	0.0	18.0	119.0	133.0	0.0	0.0	0.0	0.0	0.0	18.0	0.0	0.0	0.0	0.0	0.0	1.0
OTU335805159	Bacteria; Firmicutes; Clostridia; Clostridiales; Lachnospiraceae; uncultured; uncultured bacterium	48.0	40.0	45.0	8.0	0.0	0.0	90.0	102.0	71.0	9.0	41.0	43.0	41.0	51.0	41.0	14.0	4.0	5.0	4.0	4.0	2.0	28.0	6.0	9.0	2.0	4.0	9.0	84.0	159.0	260.0	39.0	15.0	27.0	141.0	279.0	85.0	0.0	1.0	0.0	3.0	4.0	6.0
OTU652424196	Bacteria; Parcubacteria; Candidatus Falkowbacteria	0.0	0.0	0.0	0.0	0.0	1.0	6.0	1.0	0.0	0.0	0.0	0.0	1.0	4.0	0.0	0.0	0.0	0.0	1137.0	0.0	0.0	0.0	1.0	36.0	0.0	0.0	0.0	0.0	0.0	0.0	0.0	10.0	0.0	0.0	0.0	0.0	0.0	0.0	0.0	0.0	0.0	3.0
OTU944542989	Bacteria; Bacteroidetes; SB-5	0.0	0.0	6.0	7.0	0.0	4.0	0.0	9.0	0.0	1.0	2.0	0.0	2.0	8.0	0.0	15.0	17.0	97.0	8.0	14.0	8.0	1.0	0.0	0.0	163.0	104.0	25.0	0.0	0.0	14.0	3.0	0.0	0.0	0.0	0.0	0.0	0.0	0.0	0.0	3.0	11.0	0.0
OTU53869387	Bacteria; Proteobacteria; Deltaproteobacteria; Desulfarculales; Desulfarculaceae; uncultured; uncultured bacterium	24.0	14.0	41.0	4.0	2.0	3.0	60.0	91.0	79.0	6.0	22.0	24.0	5.0	1.0	2.0	26.0	16.0	43.0	15.0	7.0	30.0	26.0	11.0	15.0	11.0	19.0	141.0	1.0	52.0	18.0	4.0	11.0	13.0	0.0	56.0	54.0	0.0	0.0	0.0	40.0	94.0	38.0
OTU465203945	Bacteria; LCP-89; uncultured bacterium; uncultured bacterium; uncultured bacterium; uncultured bacterium; uncultured bacterium	10.0	57.0	43.0	12.0	4.0	1.0	13.0	13.0	38.0	19.0	15.0	9.0	39.0	10.0	7.0	10.0	5.0	49.0	16.0	83.0	114.0	23.0	6.0	9.0	5.0	1.0	0.0	453.0	190.0	404.0	3.0	7.0	0.0	0.0	7.0	0.0	45.0	0.0	0.0	0.0	1.0	1.0
OTU526812661	Bacteria; Gracilibacteria; uncultured Compostimonas sp.; uncultured Compostimonas sp.; uncultured Compostimonas sp.; uncultured Compostimonas sp.; uncultured Compostimonas sp.	0.0	0.0	1.0	0.0	0.0	1.0	14.0	0.0	0.0	4.0	0.0	0.0	165.0	7.0	151.0	0.0	0.0	0.0	90.0	0.0	2.0	0.0	1.0	76.0	0.0	35.0	0.0	18.0	0.0	35.0	4.0	0.0	0.0	0.0	0.0	0.0	0.0	0.0	0.0	0.0	12.0	7.0
OTU309334209	Bacteria; Proteobacteria; Betaproteobacteria; Hydrogenophilales; Hydrogenophilaceae; Thiobacillus; uncultured bacterium	9.0	2.0	24.0	29.0	10.0	12.0	0.0	0.0	1.0	12.0	16.0	1.0	0.0	0.0	3.0	0.0	0.0	0.0	0.0	0.0	0.0	18.0	35.0	20.0	0.0	0.0	0.0	8.0	28.0	8.0	5.0	1.0	0.0	0.0	7.0	0.0	0.0	0.0	0.0	0.0	0.0	1.0
OTU393179837	Bacteria; Elusimicrobia; Elusimicrobia; Lineage IV; Ambiguous_taxa; Ambiguous_taxa; Ambiguous_taxa	27.0	11.0	12.0	33.0	20.0	39.0	16.0	13.0	24.0	3.0	1.0	4.0	4.0	8.0	2.0	0.0	1.0	0.0	35.0	39.0	29.0	6.0	22.0	33.0	0.0	0.0	0.0	3.0	6.0	21.0	171.0	43.0	0.0	0.0	0.0	0.0	0.0	0.0	0.0	3.0	20.0	12.0
OTU831305192	Bacteria; Cyanobacteria; Melainabacteria; Gastranaerophilales	1.0	0.0	0.0	3.0	5.0	2.0	9.0	0.0	3.0	3.0	71.0	17.0	22.0	0.0	1.0	0.0	0.0	0.0	9.0	0.0	14.0	0.0	0.0	0.0	0.0	0.0	0.0	0.0	0.0	15.0	3.0	9.0	0.0	0.0	0.0	1.0	0.0	57.0	86.0	38.0	7.0	3.0
OTU33724876	Bacteria; RBG-1 (Zixibacteria); uncultured bacterium; uncultured bacterium; uncultured bacterium; uncultured bacterium; uncultured bacterium	0.0	4.0	1.0	0.0	0.0	0.0	86.0	57.0	9.0	12.0	11.0	0.0	14.0	13.0	8.0	3.0	2.0	14.0	3.0	26.0	58.0	0.0	0.0	1.0	0.0	0.0	0.0	0.0	18.0	0.0	4.0	2.0	0.0	0.0	10.0	1.0	0.0	0.0	0.0	8.0	25.0	11.0
OTU970260308	Bacteria; Elusimicrobia; Elusimicrobia; Lineage IV; uncultured bacterium; uncultured bacterium; uncultured bacterium	27.0	3.0	11.0	11.0	11.0	9.0	55.0	46.0	44.0	94.0	88.0	69.0	24.0	19.0	9.0	0.0	0.0	1.0	81.0	27.0	16.0	11.0	42.0	17.0	0.0	0.0	1.0	39.0	67.0	41.0	84.0	47.0	43.0	0.0	9.0	56.0	103.0	52.0	12.0	9.0	19.0	16.0
OTU189015627	Bacteria; Firmicutes; Clostridia; Clostridiales; MAT-CR-H4-C10; uncultured bacterium; uncultured bacterium	114.0	3.0	4.0	3.0	5.0	0.0	0.0	1.0	14.0	22.0	7.0	3.0	2.0	0.0	0.0	7.0	1.0	10.0	0.0	3.0	2.0	0.0	0.0	0.0	1.0	0.0	1.0	682.0	65.0	0.0	0.0	9.0	0.0	0.0	9.0	0.0	0.0	1.0	0.0	0.0	4.0	1.0
OTU681223751	Archaea; Aenigmarchaeota; Aenigmarchaeota Incertae Sedis; Unknown Order; Unknown Family; Candidatus Aenigmarchaeum; uncultured archaeon	0.0	0.0	0.0	0.0	0.0	0.0	0.0	0.0	0.0	0.0	0.0	0.0	123.0	1.0	14.0	0.0	0.0	0.0	0.0	0.0	0.0	0.0	0.0	0.0	0.0	0.0	0.0	0.0	22.0	0.0	0.0	0.0	0.0	0.0	0.0	0.0	0.0	0.0	0.0	0.0	0.0	0.0
OTU136229411	Bacteria; Parcubacteria; Candidatus Falkowbacteria; uncultured bacterium; uncultured bacterium; uncultured bacterium; uncultured bacterium	0.0	0.0	0.0	0.0	0.0	0.0	0.0	0.0	0.0	0.0	0.0	0.0	0.0	0.0	0.0	17.0	1.0	52.0	0.0	0.0	0.0	2.0	1.0	0.0	26.0	33.0	34.0	0.0	0.0	0.0	0.0	0.0	0.0	0.0	0.0	0.0	0.0	0.0	0.0	0.0	0.0	0.0
OTU294090435	Bacteria; Parcubacteria; uncultured Parcubacteria group bacterium; uncultured Parcubacteria group bacterium; uncultured Parcubacteria group bacterium; uncultured Parcubacteria group bacterium; uncultured Parcubacteria group bacterium	0.0	0.0	0.0	1.0	1.0	0.0	2.0	6.0	6.0	4.0	0.0	0.0	3.0	26.0	25.0	0.0	0.0	0.0	17.0	8.0	0.0	0.0	0.0	0.0	0.0	1.0	1.0	0.0	0.0	0.0	4.0	0.0	0.0	0.0	0.0	1.0	0.0	0.0	0.0	39.0	17.0	16.0
OTU529256316	Bacteria; Planctomycetes; Phycisphaerae; CCM11a	0.0	0.0	0.0	0.0	0.0	0.0	5.0	0.0	0.0	4.0	0.0	0.0	0.0	3.0	0.0	3.0	41.0	6.0	1.0	0.0	0.0	0.0	0.0	0.0	15.0	3.0	2.0	20.0	7.0	46.0	0.0	0.0	11.0	0.0	0.0	0.0	0.0	0.0	0.0	0.0	1.0	1.0
OTU642003766	Bacteria; Firmicutes; Negativicutes; Selenomonadales; Veillonellaceae; uncultured; uncultured bacterium	3.0	8.0	15.0	0.0	0.0	1.0	7.0	21.0	27.0	0.0	4.0	7.0	0.0	0.0	1.0	0.0	1.0	0.0	0.0	3.0	0.0	19.0	0.0	0.0	0.0	3.0	14.0	10.0	0.0	30.0	2.0	2.0	2.0	0.0	26.0	22.0	0.0	13.0	0.0	19.0	16.0	10.0
OTU993969229	Bacteria; Lentisphaerae; Oligosphaeria; Oligosphaerales; MVP-94	5.0	11.0	7.0	3.0	0.0	1.0	9.0	5.0	1.0	0.0	4.0	0.0	9.0	1.0	2.0	11.0	4.0	6.0	1.0	8.0	0.0	14.0	31.0	0.0	6.0	3.0	6.0	8.0	6.0	0.0	7.0	9.0	1.0	0.0	0.0	0.0	0.0	5.0	11.0	1.0	4.0	2.0
OTU947169041	Unassigned	26.0	5.0	28.0	1.0	4.0	2.0	7.0	3.0	2.0	1.0	5.0	0.0	4.0	6.0	7.0	11.0	3.0	11.0	3.0	4.0	11.0	3.0	1.0	7.0	3.0	1.0	3.0	48.0	42.0	9.0	11.0	0.0	0.0	0.0	0.0	0.0	100.0	0.0	96.0	0.0	4.0	3.0
OTU111767118	Bacteria; Proteobacteria; Deltaproteobacteria; Desulfarculales; Desulfarculaceae; uncultured; uncultured bacterium	8.0	2.0	8.0	0.0	1.0	1.0	2.0	3.0	1.0	0.0	4.0	14.0	1.0	9.0	8.0	3.0	6.0	20.0	0.0	0.0	1.0	4.0	4.0	2.0	1.0	13.0	5.0	14.0	0.0	22.0	6.0	2.0	0.0	0.0	43.0	50.0	0.0	0.0	0.0	1.0	1.0	0.0
OTU747444163	Bacteria; Parcubacteria; Candidatus Magasanikbacteria; uncultured bacterium; uncultured bacterium; uncultured bacterium; uncultured bacterium	0.0	4.0	2.0	0.0	0.0	0.0	8.0	37.0	37.0	0.0	0.0	0.0	30.0	0.0	38.0	0.0	0.0	0.0	0.0	117.0	89.0	2.0	0.0	0.0	0.0	0.0	0.0	12.0	99.0	20.0	8.0	0.0	0.0	0.0	0.0	0.0	0.0	0.0	0.0	0.0	5.0	0.0
OTU809935035	Bacteria; Proteobacteria; Deltaproteobacteria; Desulfobacterales; Desulfobacteraceae; Desulforegula	0.0	0.0	0.0	13.0	7.0	0.0	0.0	0.0	0.0	2.0	2.0	0.0	0.0	0.0	1.0	0.0	0.0	0.0	0.0	0.0	0.0	0.0	0.0	0.0	0.0	0.0	0.0	0.0	0.0	0.0	53.0	20.0	0.0	0.0	12.0	0.0	47.0	0.0	0.0	0.0	0.0	0.0
OTU101394209	Bacteria; Proteobacteria; Deltaproteobacteria; Syntrophobacterales; Syntrophaceae; Syntrophus; uncultured bacterium	0.0	0.0	0.0	1.0	0.0	0.0	0.0	0.0	0.0	0.0	1.0	0.0	0.0	0.0	0.0	0.0	0.0	2.0	0.0	0.0	0.0	4.0	0.0	4.0	10.0	0.0	0.0	0.0	0.0	0.0	114.0	1.0	0.0	0.0	0.0	13.0	0.0	0.0	0.0	0.0	2.0	0.0
OTU47414124	Unassigned	9.0	18.0	2.0	2.0	1.0	0.0	3.0	6.0	0.0	12.0	15.0	0.0	9.0	9.0	4.0	10.0	0.0	12.0	14.0	10.0	28.0	27.0	13.0	6.0	2.0	1.0	1.0	21.0	0.0	2.0	6.0	6.0	18.0	0.0	0.0	0.0	86.0	0.0	0.0	41.0	20.0	14.0
OTU189516678	Bacteria; Proteobacteria; Deltaproteobacteria; Oligoflexales; 0319-6G20	0.0	0.0	0.0	0.0	1.0	1.0	12.0	71.0	197.0	6.0	7.0	3.0	36.0	20.0	36.0	1.0	5.0	2.0	38.0	194.0	202.0	0.0	0.0	1.0	0.0	0.0	3.0	6.0	13.0	0.0	3.0	0.0	0.0	0.0	0.0	2.0	0.0	0.0	0.0	74.0	96.0	20.0
OTU400643737	Bacteria; Spirochaetae; Spirochaetes; Spirochaetales; PL-11B10; uncultured bacterium; uncultured bacterium	0.0	0.0	0.0	0.0	0.0	0.0	2.0	19.0	8.0	0.0	0.0	0.0	0.0	5.0	1.0	0.0	0.0	0.0	0.0	0.0	0.0	0.0	0.0	0.0	0.0	0.0	1.0	0.0	0.0	0.0	5.0	0.0	0.0	0.0	0.0	0.0	109.0	0.0	0.0	0.0	0.0	0.0
OTU956990534	Bacteria; Proteobacteria; Betaproteobacteria; Rhodocyclales; Rhodocyclaceae; uncultured; uncultured bacterium	0.0	0.0	0.0	0.0	0.0	0.0	0.0	0.0	0.0	0.0	0.0	0.0	0.0	0.0	0.0	0.0	6.0	0.0	0.0	0.0	0.0	0.0	1.0	0.0	9.0	0.0	406.0	0.0	0.0	0.0	0.0	0.0	0.0	0.0	0.0	0.0	0.0	0.0	0.0	0.0	0.0	0.0
OTU817417687	Bacteria; Proteobacteria; Gammaproteobacteria; Legionellales; Coxiellaceae; Coxiella; uncultured bacterium	0.0	0.0	0.0	0.0	0.0	0.0	2.0	2.0	5.0	0.0	0.0	0.0	1.0	0.0	0.0	5.0	4.0	3.0	0.0	4.0	4.0	5.0	1.0	2.0	37.0	0.0	0.0	0.0	10.0	0.0	7.0	1.0	0.0	0.0	0.0	0.0	0.0	0.0	0.0	0.0	69.0	0.0
OTU671282699	Bacteria; Proteobacteria; Deltaproteobacteria; Desulfarculales; Desulfarculaceae; uncultured; uncultured bacterium	1.0	10.0	11.0	1.0	3.0	6.0	34.0	23.0	43.0	1.0	4.0	1.0	11.0	6.0	1.0	19.0	14.0	11.0	10.0	28.0	6.0	2.0	0.0	2.0	1.0	4.0	0.0	0.0	0.0	0.0	4.0	20.0	4.0	0.0	0.0	0.0	0.0	0.0	90.0	16.0	9.0	12.0
OTU913911839	Bacteria; Acidobacteria; Holophagae; Holophagales; Holophagaceae; uncultured	4.0	4.0	10.0	0.0	1.0	0.0	3.0	0.0	2.0	9.0	2.0	9.0	1.0	0.0	0.0	0.0	1.0	0.0	0.0	0.0	0.0	14.0	4.0	2.0	0.0	2.0	41.0	21.0	0.0	22.0	7.0	3.0	0.0	0.0	153.0	36.0	0.0	0.0	0.0	3.0	6.0	4.0
OTU831034333	Bacteria; Proteobacteria; Deltaproteobacteria; Desulfobacterales; Desulfobulbaceae; MSBL7	4.0	0.0	0.0	0.0	2.0	0.0	5.0	6.0	46.0	5.0	11.0	1.0	46.0	2.0	37.0	0.0	0.0	1.0	39.0	3.0	6.0	0.0	0.0	0.0	0.0	0.0	0.0	0.0	0.0	0.0	22.0	12.0	4.0	0.0	0.0	0.0	0.0	0.0	0.0	107.0	202.0	0.0
OTU936132223	Bacteria; Parcubacteria; uncultured bacterium; uncultured bacterium; uncultured bacterium; uncultured bacterium; uncultured bacterium	0.0	0.0	0.0	0.0	0.0	1.0	19.0	45.0	11.0	0.0	0.0	0.0	21.0	47.0	10.0	1.0	3.0	2.0	411.0	8.0	0.0	0.0	0.0	8.0	0.0	1.0	0.0	0.0	0.0	0.0	1.0	0.0	0.0	0.0	0.0	2.0	0.0	0.0	0.0	57.0	0.0	28.0
OTU94032238	Bacteria; Parcubacteria; uncultured bacterium; uncultured bacterium; uncultured bacterium; uncultured bacterium; uncultured bacterium	0.0	0.0	0.0	0.0	0.0	0.0	0.0	2.0	0.0	0.0	0.0	0.0	0.0	2.0	0.0	1.0	0.0	0.0	0.0	0.0	0.0	33.0	0.0	0.0	2.0	321.0	10.0	0.0	0.0	0.0	0.0	0.0	0.0	0.0	0.0	0.0	0.0	0.0	0.0	0.0	0.0	0.0
OTU333625690	Bacteria; Parcubacteria; Candidatus Jorgensenbacteria bacterium GW2011_GWF2_41_8; Candidatus Jorgensenbacteria bacterium GW2011_GWF2_41_8; Candidatus Jorgensenbacteria bacterium GW2011_GWF2_41_8; Candidatus Jorgensenbacteria bacterium GW2011_GWF2_41_8; Candidatus Jorgensenbacteria bacterium GW2011_GWF2_41_8	0.0	0.0	0.0	0.0	0.0	0.0	0.0	0.0	0.0	0.0	0.0	0.0	0.0	0.0	0.0	0.0	127.0	64.0	2.0	0.0	0.0	0.0	0.0	8.0	0.0	154.0	0.0	0.0	0.0	0.0	0.0	0.0	0.0	0.0	0.0	0.0	0.0	0.0	0.0	0.0	0.0	0.0
OTU9075332	Bacteria; Proteobacteria; Deltaproteobacteria; Myxococcales; VHS-B3-70; uncultured bacterium; uncultured bacterium	0.0	11.0	0.0	0.0	0.0	0.0	6.0	17.0	31.0	0.0	7.0	2.0	26.0	2.0	6.0	0.0	0.0	0.0	13.0	7.0	2.0	0.0	0.0	2.0	0.0	0.0	0.0	19.0	57.0	0.0	0.0	9.0	0.0	0.0	0.0	0.0	0.0	0.0	64.0	9.0	13.0	5.0
OTU485893874	Bacteria; Proteobacteria; Deltaproteobacteria; Myxococcales; VHS-B4-70	44.0	37.0	43.0	4.0	0.0	2.0	4.0	11.0	25.0	10.0	13.0	10.0	5.0	4.0	0.0	3.0	8.0	2.0	0.0	13.0	8.0	101.0	25.0	106.0	0.0	2.0	4.0	0.0	0.0	0.0	24.0	0.0	16.0	0.0	0.0	0.0	0.0	0.0	0.0	0.0	1.0	28.0
OTU409460261	Bacteria; Actinobacteria; Acidimicrobiia; Acidimicrobiales; OM1 clade; uncultured bacterium; uncultured bacterium	1.0	1.0	0.0	0.0	0.0	0.0	0.0	0.0	0.0	4.0	1.0	1.0	7.0	4.0	2.0	0.0	1.0	0.0	0.0	4.0	3.0	3.0	3.0	11.0	1.0	7.0	2.0	0.0	26.0	17.0	19.0	27.0	0.0	0.0	16.0	0.0	0.0	0.0	0.0	0.0	0.0	0.0
OTU788160467	Unassigned	0.0	0.0	0.0	0.0	0.0	0.0	0.0	0.0	0.0	0.0	0.0	0.0	0.0	0.0	0.0	0.0	0.0	0.0	0.0	0.0	0.0	57.0	378.0	0.0	0.0	0.0	0.0	0.0	0.0	0.0	4.0	19.0	0.0	0.0	0.0	0.0	0.0	0.0	0.0	0.0	0.0	0.0
OTU585482669	Bacteria; Parcubacteria; Candidatus Falkowbacteria; uncultured bacterium; uncultured bacterium; uncultured bacterium; uncultured bacterium	4.0	0.0	4.0	12.0	2.0	1.0	2.0	0.0	1.0	4.0	4.0	2.0	2.0	17.0	0.0	2.0	0.0	1.0	5.0	5.0	1.0	5.0	6.0	1.0	1.0	3.0	1.0	18.0	9.0	3.0	0.0	5.0	0.0	0.0	0.0	0.0	0.0	41.0	0.0	40.0	45.0	9.0
OTU723481119	Bacteria; Gracilibacteria; uncultured bacterium; uncultured bacterium; uncultured bacterium; uncultured bacterium; uncultured bacterium	0.0	12.0	3.0	7.0	2.0	0.0	0.0	0.0	4.0	3.0	49.0	7.0	1.0	1.0	0.0	0.0	0.0	0.0	1.0	1.0	1.0	13.0	10.0	0.0	0.0	0.0	1.0	0.0	9.0	0.0	30.0	1.0	1.0	0.0	25.0	0.0	16.0	0.0	0.0	0.0	0.0	1.0
OTU802547012	Bacteria; Firmicutes; Clostridia; Halanaerobiales; ODP1230B8.23; uncultured bacterium; uncultured bacterium	2.0	0.0	0.0	0.0	0.0	0.0	12.0	12.0	8.0	0.0	2.0	0.0	2.0	1.0	1.0	15.0	15.0	7.0	0.0	2.0	2.0	2.0	4.0	0.0	16.0	10.0	27.0	12.0	0.0	11.0	7.0	1.0	0.0	0.0	1.0	6.0	0.0	0.0	0.0	28.0	27.0	24.0
OTU369882294	Bacteria; Parcubacteria; Candidatus Moranbacteria; uncultured bacterium; uncultured bacterium; uncultured bacterium; uncultured bacterium	14.0	0.0	0.0	0.0	2.0	3.0	0.0	4.0	0.0	8.0	14.0	2.0	3.0	4.0	0.0	0.0	0.0	0.0	0.0	2.0	0.0	0.0	14.0	6.0	1.0	0.0	0.0	26.0	197.0	0.0	0.0	0.0	0.0	0.0	0.0	0.0	37.0	75.0	82.0	2.0	38.0	0.0
OTU245140593	Bacteria; Chloroflexi; SBR2076	0.0	0.0	0.0	0.0	0.0	0.0	1.0	0.0	0.0	2.0	0.0	0.0	1.0	3.0	0.0	11.0	0.0	0.0	0.0	0.0	0.0	0.0	0.0	0.0	78.0	47.0	9.0	0.0	0.0	0.0	0.0	0.0	0.0	0.0	0.0	0.0	0.0	0.0	0.0	0.0	0.0	0.0
OTU224672745	Bacteria; Chloroflexi; Anaerolineae; Anaerolineales; Anaerolineaceae; uncultured; uncultured bacterium	18.0	1.0	2.0	59.0	42.0	46.0	36.0	12.0	8.0	39.0	39.0	11.0	2.0	1.0	2.0	4.0	6.0	4.0	7.0	3.0	1.0	17.0	30.0	19.0	0.0	1.0	4.0	3.0	33.0	29.0	30.0	55.0	27.0	0.0	24.0	10.0	68.0	137.0	39.0	20.0	42.0	3.0
OTU274211049	Bacteria; Acidobacteria; Holophagae; Holophagales; Holophagaceae; uncultured	1.0	0.0	1.0	0.0	0.0	0.0	0.0	0.0	2.0	0.0	6.0	2.0	0.0	0.0	0.0	1.0	0.0	4.0	0.0	0.0	0.0	0.0	0.0	0.0	0.0	1.0	3.0	29.0	0.0	89.0	0.0	4.0	0.0	0.0	35.0	0.0	0.0	0.0	0.0	0.0	0.0	0.0
OTU694742865	Bacteria; Bacteroidetes; Flavobacteriia; Flavobacteriales; Flavobacteriaceae; Flavobacterium; Ambiguous_taxa	12.0	1.0	2.0	3.0	0.0	0.0	0.0	0.0	2.0	21.0	1.0	0.0	0.0	0.0	0.0	0.0	0.0	0.0	0.0	0.0	0.0	3.0	16.0	11.0	0.0	1.0	0.0	61.0	39.0	234.0	1.0	1.0	0.0	0.0	0.0	0.0	0.0	0.0	0.0	0.0	0.0	0.0
OTU841878983	Bacteria; Proteobacteria; Deltaproteobacteria; Desulfuromonadales; Geobacteraceae; Geobacter	0.0	0.0	0.0	0.0	0.0	1.0	0.0	0.0	0.0	0.0	0.0	0.0	0.0	0.0	0.0	0.0	0.0	0.0	0.0	0.0	0.0	0.0	0.0	0.0	0.0	383.0	0.0	0.0	0.0	0.0	0.0	0.0	0.0	0.0	0.0	0.0	0.0	0.0	0.0	0.0	0.0	0.0
OTU387887159	Unassigned	0.0	20.0	9.0	0.0	0.0	0.0	3.0	7.0	0.0	37.0	13.0	4.0	7.0	27.0	18.0	6.0	23.0	5.0	12.0	125.0	195.0	3.0	1.0	7.0	0.0	0.0	2.0	0.0	16.0	21.0	8.0	5.0	1.0	0.0	27.0	0.0	0.0	0.0	0.0	6.0	18.0	11.0
OTU718472597	Bacteria; FCPU426; uncultured bacterium; uncultured bacterium; uncultured bacterium; uncultured bacterium; uncultured bacterium	186.0	48.0	87.0	1.0	3.0	4.0	11.0	8.0	33.0	5.0	9.0	28.0	0.0	0.0	0.0	0.0	0.0	0.0	5.0	0.0	4.0	27.0	120.0	29.0	0.0	0.0	0.0	0.0	0.0	17.0	8.0	37.0	0.0	0.0	0.0	176.0	0.0	0.0	0.0	51.0	53.0	5.0
OTU842508295	Bacteria; Proteobacteria; Deltaproteobacteria; Desulfobacterales; Desulfobulbaceae; Desulfurivibrio; uncultured bacterium	0.0	0.0	0.0	2.0	3.0	1.0	26.0	28.0	189.0	0.0	2.0	2.0	159.0	3.0	92.0	0.0	0.0	0.0	140.0	5.0	12.0	0.0	0.0	0.0	1.0	0.0	3.0	0.0	0.0	0.0	145.0	296.0	57.0	0.0	0.0	2.0	0.0	0.0	0.0	118.0	326.0	1.0
OTU219265790	Bacteria; Deferribacteres; Deferribacteres Incertae Sedis; Unknown Order; Unknown Family; Caldithrix; uncultured prokaryote	32.0	27.0	5.0	2.0	3.0	0.0	3.0	3.0	4.0	8.0	6.0	0.0	12.0	6.0	2.0	0.0	0.0	2.0	0.0	0.0	0.0	2.0	7.0	6.0	0.0	0.0	0.0	362.0	0.0	36.0	0.0	14.0	7.0	0.0	0.0	0.0	0.0	0.0	56.0	25.0	10.0	0.0
OTU5178986	Bacteria; Proteobacteria; Deltaproteobacteria; Desulfobacterales; Desulfobacteraceae	6.0	6.0	1.0	0.0	8.0	2.0	3.0	2.0	5.0	2.0	1.0	0.0	0.0	4.0	0.0	2.0	2.0	6.0	1.0	9.0	3.0	13.0	24.0	12.0	6.0	6.0	12.0	0.0	41.0	0.0	18.0	0.0	0.0	37.0	0.0	7.0	0.0	0.0	0.0	2.0	7.0	5.0
OTU82940647	Bacteria; Hydrogenedentes; uncultured bacterium; uncultured bacterium; uncultured bacterium; uncultured bacterium; uncultured bacterium	0.0	0.0	4.0	1.0	0.0	3.0	1.0	0.0	0.0	0.0	0.0	0.0	1.0	0.0	0.0	2.0	0.0	3.0	0.0	7.0	0.0	0.0	10.0	11.0	0.0	3.0	2.0	3.0	0.0	53.0	0.0	13.0	35.0	0.0	0.0	0.0	68.0	0.0	0.0	0.0	3.0	0.0
OTU960538497	Unassigned	0.0	1.0	0.0	0.0	0.0	6.0	0.0	0.0	0.0	0.0	0.0	0.0	1.0	4.0	0.0	17.0	0.0	68.0	0.0	0.0	0.0	0.0	0.0	8.0	4.0	134.0	0.0	0.0	0.0	0.0	0.0	0.0	0.0	0.0	0.0	0.0	0.0	0.0	0.0	0.0	0.0	0.0
OTU437047466	Unassigned	0.0	0.0	0.0	0.0	0.0	0.0	0.0	0.0	0.0	0.0	0.0	0.0	0.0	0.0	0.0	0.0	0.0	0.0	0.0	0.0	0.0	0.0	0.0	5.0	0.0	195.0	0.0	0.0	0.0	0.0	0.0	0.0	0.0	0.0	0.0	0.0	0.0	0.0	0.0	0.0	0.0	0.0
OTU342945315	Bacteria; Proteobacteria; Alphaproteobacteria; Rhodospirillales; Rhodospirillaceae	0.0	0.0	0.0	0.0	0.0	1.0	0.0	0.0	0.0	0.0	0.0	0.0	0.0	0.0	0.0	8.0	2.0	0.0	0.0	0.0	0.0	0.0	0.0	0.0	0.0	2.0	0.0	0.0	0.0	0.0	336.0	0.0	0.0	0.0	0.0	0.0	0.0	0.0	0.0	0.0	0.0	1.0
OTU298065120	Bacteria; Proteobacteria; Deltaproteobacteria; Desulfobacterales; Desulfobulbaceae; Desulfobulbus; uncultured bacterium	0.0	0.0	0.0	0.0	0.0	0.0	0.0	0.0	0.0	0.0	0.0	0.0	1056.0	648.0	425.0	21.0	5.0	32.0	1.0	5.0	4.0	0.0	0.0	0.0	0.0	30.0	2.0	0.0	0.0	0.0	8.0	0.0	0.0	0.0	0.0	1.0	0.0	0.0	0.0	13.0	35.0	18.0
OTU325962363	Bacteria; Planctomycetes; Planctomycetacia; Planctomycetales; Planctomycetaceae; uncultured; uncultured bacterium	33.0	13.0	21.0	1.0	0.0	3.0	22.0	10.0	26.0	0.0	0.0	0.0	1.0	6.0	6.0	23.0	53.0	57.0	8.0	22.0	20.0	0.0	0.0	9.0	7.0	27.0	25.0	52.0	42.0	25.0	2.0	0.0	0.0	0.0	0.0	1.0	0.0	0.0	80.0	2.0	0.0	0.0
OTU663527312	Bacteria; Proteobacteria; Deltaproteobacteria; Desulfuromonadales; Geobacteraceae; Geobacter; Ambiguous_taxa	28.0	7.0	11.0	47.0	19.0	12.0	97.0	240.0	293.0	34.0	38.0	23.0	108.0	19.0	12.0	0.0	3.0	2.0	100.0	34.0	17.0	0.0	2.0	5.0	0.0	9.0	4.0	2.0	1.0	4.0	21.0	15.0	6.0	202.0	70.0	368.0	22.0	1.0	7.0	96.0	140.0	111.0
OTU505700708	Bacteria; Chloroflexi; Anaerolineae; Anaerolineales; Anaerolineaceae; uncultured; uncultured bacterium	2.0	0.0	0.0	1.0	0.0	0.0	0.0	0.0	0.0	0.0	1.0	0.0	0.0	0.0	0.0	9.0	0.0	10.0	0.0	0.0	1.0	0.0	0.0	0.0	62.0	16.0	46.0	0.0	2.0	0.0	0.0	4.0	1.0	0.0	0.0	0.0	32.0	0.0	0.0	0.0	0.0	0.0
OTU333498951	Bacteria; Parcubacteria; Candidatus Azambacteria; uncultured bacterium; uncultured bacterium; uncultured bacterium; uncultured bacterium	0.0	15.0	2.0	0.0	2.0	0.0	12.0	6.0	4.0	1.0	5.0	7.0	2.0	0.0	3.0	0.0	0.0	0.0	0.0	0.0	3.0	6.0	6.0	0.0	0.0	0.0	0.0	0.0	0.0	2.0	44.0	44.0	0.0	0.0	0.0	0.0	56.0	0.0	0.0	3.0	4.0	0.0
OTU396970822	Bacteria; Bacteroidetes; Flavobacteriia; Flavobacteriales; Flavobacteriaceae; Maritimimonas; uncultured bacterium	0.0	0.0	1.0	98.0	164.0	192.0	0.0	0.0	0.0	0.0	0.0	0.0	0.0	0.0	0.0	0.0	0.0	0.0	11.0	0.0	7.0	0.0	0.0	0.0	0.0	0.0	1.0	0.0	0.0	0.0	5.0	1.0	3.0	0.0	0.0	0.0	0.0	0.0	0.0	0.0	0.0	0.0
OTU105021662	Archaea; Euryarchaeota; Thermoplasmata; Thermoplasmatales; AMOS1A-4113-D04; uncultured archaeon; uncultured archaeon	21.0	7.0	0.0	3.0	5.0	1.0	48.0	4.0	120.0	12.0	45.0	5.0	54.0	42.0	36.0	10.0	15.0	16.0	103.0	130.0	154.0	0.0	2.0	11.0	0.0	0.0	0.0	0.0	10.0	0.0	23.0	67.0	0.0	0.0	0.0	4.0	0.0	0.0	0.0	184.0	49.0	24.0
OTU522907395	Bacteria; Chloroflexi; Anaerolineae; Anaerolineales; Anaerolineaceae; Bellilinea; uncultured bacterium	0.0	0.0	0.0	0.0	0.0	0.0	0.0	1.0	1.0	1.0	4.0	0.0	1.0	1.0	0.0	1.0	3.0	0.0	0.0	0.0	7.0	0.0	1.0	2.0	0.0	0.0	2.0	3.0	17.0	13.0	0.0	0.0	0.0	0.0	0.0	40.0	0.0	44.0	9.0	0.0	0.0	0.0
OTU737734090	Bacteria; Nitrospirae; Nitrospira; Nitrospirales; Nitrospiraceae; uncultured; uncultured bacterium	0.0	359.0	0.0	0.0	0.0	0.0	0.0	0.0	0.0	0.0	0.0	0.0	1.0	0.0	0.0	11.0	3.0	0.0	0.0	0.0	0.0	5.0	0.0	0.0	507.0	5.0	0.0	0.0	0.0	0.0	20.0	0.0	0.0	0.0	8.0	0.0	0.0	0.0	0.0	0.0	0.0	0.0
OTU631890296	Unassigned	2.0	0.0	0.0	1.0	0.0	0.0	0.0	1.0	3.0	7.0	9.0	1.0	0.0	5.0	1.0	0.0	1.0	0.0	25.0	23.0	39.0	0.0	0.0	0.0	0.0	0.0	0.0	0.0	0.0	0.0	2.0	0.0	0.0	0.0	0.0	0.0	19.0	0.0	0.0	2.0	33.0	2.0
OTU504202536	Unassigned	0.0	0.0	5.0	0.0	0.0	0.0	1.0	9.0	10.0	2.0	4.0	0.0	27.0	21.0	4.0	9.0	4.0	20.0	1.0	14.0	48.0	0.0	0.0	10.0	2.0	1.0	0.0	0.0	0.0	0.0	0.0	5.0	12.0	0.0	0.0	0.0	0.0	0.0	0.0	0.0	2.0	3.0
OTU614360695	Bacteria; Proteobacteria; Deltaproteobacteria; Desulfobacterales; Desulfobulbaceae	2.0	0.0	0.0	2.0	0.0	0.0	0.0	0.0	0.0	19.0	1.0	0.0	0.0	0.0	0.0	0.0	0.0	0.0	1.0	0.0	0.0	0.0	3.0	4.0	1.0	0.0	0.0	5.0	22.0	0.0	29.0	0.0	11.0	21.0	0.0	0.0	9.0	0.0	74.0	0.0	0.0	0.0
OTU972271126	Bacteria; Proteobacteria; Gammaproteobacteria; Chromatiales; Halothiobacillaceae; Thiovirga; uncultured bacterium	0.0	19.0	6.0	67.0	2.0	0.0	0.0	0.0	0.0	21.0	24.0	6.0	0.0	0.0	0.0	0.0	0.0	0.0	0.0	0.0	0.0	2.0	0.0	0.0	0.0	0.0	0.0	0.0	0.0	1.0	0.0	0.0	0.0	0.0	0.0	0.0	0.0	0.0	0.0	0.0	0.0	0.0
OTU217627280	Unassigned	0.0	0.0	0.0	0.0	0.0	1.0	24.0	17.0	124.0	0.0	0.0	1.0	66.0	26.0	23.0	0.0	3.0	13.0	10.0	104.0	8.0	0.0	0.0	6.0	0.0	2.0	0.0	0.0	13.0	0.0	0.0	0.0	0.0	0.0	0.0	0.0	0.0	0.0	0.0	0.0	12.0	48.0
OTU604965394	Bacteria; Cyanobacteria; Melainabacteria; Gastranaerophilales	2.0	0.0	2.0	0.0	2.0	4.0	4.0	1.0	14.0	3.0	8.0	4.0	8.0	1.0	25.0	33.0	15.0	38.0	44.0	15.0	8.0	0.0	0.0	0.0	3.0	5.0	7.0	33.0	31.0	0.0	17.0	6.0	0.0	0.0	0.0	16.0	0.0	0.0	0.0	19.0	16.0	6.0
OTU44116070	Bacteria; Proteobacteria; Deltaproteobacteria; Desulfobacterales; Desulfobulbaceae; MSBL7; uncultured bacterium	29.0	0.0	0.0	5.0	4.0	2.0	221.0	24.0	236.0	592.0	1740.0	768.0	133.0	39.0	156.0	1.0	11.0	5.0	2143.0	14.0	48.0	3.0	5.0	13.0	0.0	3.0	7.0	0.0	13.0	65.0	2.0	31.0	71.0	44.0	189.0	224.0	0.0	0.0	0.0	240.0	447.0	5.0
OTU144519082	Bacteria; Proteobacteria; Betaproteobacteria; Rhodocyclales; Rhodocyclaceae; Denitratisoma	0.0	0.0	0.0	0.0	1.0	0.0	0.0	0.0	0.0	0.0	0.0	0.0	0.0	0.0	0.0	0.0	0.0	0.0	0.0	0.0	0.0	0.0	0.0	0.0	387.0	2.0	0.0	0.0	0.0	0.0	1.0	0.0	0.0	0.0	0.0	2.0	0.0	0.0	0.0	0.0	0.0	0.0
OTU127202996	Unassigned	0.0	0.0	0.0	0.0	0.0	0.0	0.0	0.0	2.0	0.0	0.0	4.0	0.0	0.0	0.0	0.0	0.0	0.0	0.0	0.0	0.0	18.0	96.0	42.0	0.0	0.0	0.0	0.0	0.0	2.0	0.0	0.0	0.0	0.0	0.0	0.0	0.0	0.0	0.0	0.0	0.0	0.0
OTU698520174	Bacteria; Proteobacteria; Deltaproteobacteria; Desulfuromonadales; Desulfuromonadaceae; Desulfuromonas	1.0	0.0	0.0	10.0	1.0	0.0	4.0	4.0	15.0	5.0	25.0	53.0	3.0	20.0	2.0	7.0	1.0	2.0	4.0	2.0	1.0	0.0	0.0	8.0	0.0	0.0	1.0	0.0	0.0	0.0	10.0	0.0	0.0	0.0	0.0	0.0	0.0	0.0	0.0	18.0	11.0	0.0
OTU650040836	Bacteria; Proteobacteria; Deltaproteobacteria; Myxococcales; Phaselicystidaceae; Phaselicystis; uncultured bacterium	4.0	4.0	0.0	0.0	3.0	4.0	4.0	1.0	10.0	11.0	13.0	3.0	9.0	8.0	12.0	3.0	4.0	1.0	11.0	39.0	3.0	0.0	7.0	0.0	0.0	0.0	3.0	22.0	0.0	0.0	17.0	0.0	0.0	0.0	0.0	0.0	0.0	0.0	0.0	30.0	21.0	3.0
OTU938141447	Bacteria; Cyanobacteria; ML635J-21; uncultured bacterium; uncultured bacterium; uncultured bacterium; uncultured bacterium	0.0	2.0	0.0	0.0	0.0	0.0	1.0	18.0	56.0	19.0	0.0	0.0	29.0	23.0	8.0	0.0	0.0	0.0	21.0	9.0	12.0	0.0	0.0	0.0	0.0	0.0	0.0	1.0	7.0	0.0	4.0	10.0	0.0	0.0	0.0	0.0	0.0	0.0	0.0	0.0	1.0	1.0
OTU43321897	Unassigned	0.0	0.0	0.0	0.0	0.0	0.0	0.0	0.0	0.0	0.0	0.0	0.0	0.0	0.0	0.0	0.0	0.0	0.0	1.0	0.0	0.0	0.0	0.0	0.0	0.0	258.0	0.0	0.0	0.0	0.0	0.0	0.0	0.0	0.0	0.0	0.0	0.0	0.0	0.0	0.0	0.0	0.0
OTU544904949	Unassigned	0.0	0.0	0.0	4.0	6.0	1.0	0.0	0.0	0.0	0.0	0.0	0.0	0.0	0.0	0.0	0.0	0.0	0.0	0.0	12.0	0.0	0.0	0.0	0.0	0.0	0.0	0.0	13.0	0.0	246.0	0.0	0.0	0.0	0.0	0.0	0.0	0.0	0.0	0.0	0.0	0.0	0.0
OTU554731469	Bacteria; Bacteroidetes; Sphingobacteriia; Sphingobacteriales; Lentimicrobiaceae	0.0	0.0	0.0	5.0	0.0	0.0	0.0	0.0	0.0	1.0	3.0	0.0	0.0	1.0	0.0	29.0	96.0	94.0	0.0	0.0	0.0	4.0	3.0	5.0	16.0	37.0	13.0	36.0	0.0	0.0	0.0	0.0	0.0	0.0	0.0	0.0	0.0	0.0	0.0	0.0	0.0	0.0
OTU155447770	Bacteria; Proteobacteria; Deltaproteobacteria; Syntrophobacterales; Syntrophobacteraceae; Syntrophobacter	36.0	4.0	1.0	0.0	0.0	2.0	0.0	0.0	0.0	2.0	4.0	3.0	0.0	0.0	0.0	0.0	0.0	0.0	0.0	3.0	0.0	1.0	15.0	24.0	0.0	1.0	5.0	46.0	29.0	57.0	2.0	10.0	0.0	0.0	60.0	55.0	0.0	0.0	0.0	0.0	2.0	0.0
OTU716693137	Unassigned	0.0	1.0	0.0	0.0	0.0	0.0	2.0	0.0	0.0	0.0	0.0	0.0	6.0	0.0	8.0	83.0	8.0	3.0	0.0	4.0	18.0	0.0	0.0	0.0	0.0	0.0	0.0	0.0	0.0	0.0	4.0	17.0	0.0	0.0	0.0	0.0	0.0	0.0	0.0	0.0	0.0	1.0
OTU651182139	Bacteria; Parcubacteria; Candidatus Moranbacteria	0.0	0.0	9.0	0.0	0.0	0.0	0.0	0.0	0.0	0.0	2.0	0.0	0.0	13.0	0.0	2.0	52.0	1.0	4.0	0.0	8.0	0.0	0.0	3.0	0.0	22.0	6.0	0.0	25.0	0.0	0.0	0.0	3.0	0.0	0.0	0.0	0.0	0.0	58.0	0.0	0.0	9.0
OTU421514087	Bacteria; Bacteroidetes; Bacteroidia; Bacteroidales; Marinilabiaceae; uncultured; uncultured bacterium	0.0	0.0	0.0	0.0	0.0	0.0	0.0	0.0	0.0	0.0	0.0	0.0	2.0	0.0	0.0	0.0	0.0	0.0	0.0	0.0	0.0	0.0	0.0	0.0	0.0	0.0	0.0	0.0	0.0	0.0	0.0	0.0	0.0	0.0	0.0	0.0	0.0	60.0	97.0	0.0	0.0	0.0
OTU894096777	Bacteria; Proteobacteria; Deltaproteobacteria; Desulfovibrionales; Desulfovibrionaceae; Desulfovibrio	0.0	1.0	7.0	0.0	0.0	2.0	0.0	0.0	0.0	1.0	0.0	0.0	0.0	0.0	0.0	0.0	0.0	0.0	0.0	0.0	0.0	0.0	0.0	1.0	0.0	0.0	6.0	0.0	23.0	0.0	3.0	16.0	22.0	0.0	165.0	52.0	0.0	0.0	0.0	0.0	0.0	0.0
OTU354069649	Bacteria; Latescibacteria; uncultured bacterium; uncultured bacterium; uncultured bacterium; uncultured bacterium; uncultured bacterium	0.0	1.0	0.0	0.0	0.0	0.0	14.0	5.0	4.0	0.0	0.0	0.0	8.0	5.0	4.0	12.0	11.0	2.0	12.0	17.0	23.0	0.0	0.0	0.0	0.0	0.0	0.0	0.0	0.0	0.0	0.0	0.0	0.0	0.0	0.0	0.0	0.0	0.0	0.0	6.0	26.0	6.0
OTU10986389	Bacteria; Spirochaetae; Spirochaetes; Spirochaetales; Spirochaetaceae; Spirochaeta 2; uncultured bacterium	1.0	4.0	7.0	0.0	2.0	5.0	11.0	18.0	29.0	5.0	1.0	15.0	6.0	0.0	1.0	1.0	0.0	0.0	7.0	1.0	2.0	0.0	4.0	1.0	0.0	0.0	2.0	133.0	18.0	158.0	0.0	0.0	14.0	0.0	17.0	28.0	0.0	0.0	0.0	1.0	17.0	2.0
OTU828672909	Bacteria; Bacteroidetes; Bacteroidia; Bacteroidales; Porphyromonadaceae; uncultured; uncultured bacterium	20.0	43.0	4.0	0.0	1.0	0.0	0.0	14.0	45.0	0.0	0.0	0.0	0.0	0.0	0.0	0.0	0.0	0.0	1.0	0.0	1.0	0.0	0.0	0.0	0.0	0.0	4.0	101.0	33.0	0.0	0.0	0.0	0.0	0.0	32.0	85.0	0.0	0.0	0.0	0.0	0.0	0.0
OTU910504935	Bacteria; Proteobacteria; Gammaproteobacteria; Legionellales; Coxiellaceae; Coxiella; uncultured bacterium	0.0	2.0	1.0	3.0	1.0	0.0	0.0	0.0	11.0	0.0	0.0	0.0	9.0	10.0	1.0	11.0	7.0	53.0	8.0	4.0	9.0	0.0	0.0	0.0	1.0	5.0	0.0	0.0	0.0	9.0	3.0	0.0	0.0	0.0	0.0	0.0	0.0	0.0	0.0	23.0	11.0	16.0
OTU924566498	Bacteria; Gracilibacteria; uncultured Compostimonas sp.; uncultured Compostimonas sp.; uncultured Compostimonas sp.; uncultured Compostimonas sp.; uncultured Compostimonas sp.	0.0	0.0	0.0	0.0	0.0	0.0	0.0	0.0	0.0	0.0	0.0	0.0	0.0	0.0	0.0	0.0	0.0	110.0	0.0	505.0	0.0	0.0	0.0	0.0	0.0	0.0	0.0	0.0	0.0	0.0	0.0	0.0	0.0	0.0	0.0	0.0	0.0	0.0	0.0	0.0	0.0	0.0
OTU494561749	Archaea; Thaumarchaeota; Group C3; Ambiguous_taxa; Ambiguous_taxa; Ambiguous_taxa; Ambiguous_taxa	4.0	1.0	0.0	0.0	2.0	1.0	5.0	2.0	0.0	0.0	2.0	0.0	0.0	2.0	0.0	0.0	0.0	0.0	0.0	0.0	3.0	7.0	3.0	3.0	0.0	1.0	4.0	12.0	46.0	50.0	1.0	5.0	0.0	0.0	0.0	0.0	5.0	0.0	0.0	0.0	0.0	0.0
OTU646352412	Bacteria; Proteobacteria; Deltaproteobacteria; Desulfobacterales; Desulfobacteraceae	17.0	22.0	18.0	13.0	7.0	4.0	16.0	4.0	17.0	32.0	40.0	25.0	7.0	7.0	1.0	7.0	1.0	3.0	1.0	9.0	1.0	3.0	36.0	22.0	1.0	1.0	4.0	37.0	101.0	65.0	25.0	26.0	0.0	0.0	85.0	34.0	54.0	0.0	0.0	1.0	6.0	5.0
OTU36788809	Unassigned	0.0	0.0	0.0	0.0	0.0	1.0	0.0	17.0	18.0	0.0	0.0	0.0	9.0	3.0	5.0	0.0	0.0	0.0	23.0	90.0	3.0	0.0	0.0	0.0	0.0	0.0	0.0	0.0	3.0	0.0	6.0	0.0	0.0	0.0	0.0	0.0	0.0	0.0	0.0	0.0	3.0	45.0
OTU18917252	Unassigned	0.0	0.0	2.0	3.0	0.0	0.0	5.0	1.0	12.0	2.0	0.0	4.0	0.0	0.0	0.0	0.0	2.0	0.0	0.0	0.0	0.0	91.0	28.0	1.0	0.0	0.0	3.0	21.0	9.0	0.0	6.0	14.0	0.0	0.0	0.0	0.0	0.0	0.0	0.0	1.0	4.0	1.0
OTU824549252	Bacteria; Actinobacteria; Coriobacteriia; Coriobacteriales; Coriobacteriaceae; uncultured; Ambiguous_taxa	1.0	0.0	2.0	1.0	1.0	0.0	1.0	3.0	2.0	0.0	6.0	3.0	13.0	4.0	2.0	4.0	1.0	10.0	1.0	2.0	12.0	0.0	2.0	0.0	0.0	0.0	2.0	0.0	3.0	0.0	9.0	0.0	26.0	0.0	0.0	2.0	2.0	24.0	36.0	9.0	11.0	12.0
OTU718757341	Bacteria; Elusimicrobia; Elusimicrobia; Lineage IV; uncultured bacterium; uncultured bacterium; uncultured bacterium	11.0	6.0	10.0	0.0	0.0	0.0	6.0	10.0	9.0	3.0	0.0	1.0	105.0	54.0	15.0	1.0	3.0	5.0	17.0	18.0	16.0	0.0	5.0	0.0	0.0	2.0	4.0	0.0	0.0	0.0	4.0	0.0	0.0	0.0	0.0	2.0	0.0	0.0	0.0	17.0	22.0	7.0
OTU23774206	Bacteria; BRC1; uncultured bacterium; uncultured bacterium; uncultured bacterium; uncultured bacterium; uncultured bacterium	0.0	6.0	0.0	1.0	0.0	0.0	4.0	0.0	6.0	6.0	5.0	0.0	0.0	5.0	2.0	3.0	5.0	2.0	2.0	0.0	6.0	17.0	4.0	28.0	13.0	11.0	16.0	6.0	8.0	4.0	2.0	0.0	0.0	0.0	0.0	0.0	33.0	0.0	62.0	3.0	0.0	1.0
OTU360254996	Bacteria; Omnitrophica; uncultured bacterium; uncultured bacterium; uncultured bacterium; uncultured bacterium; uncultured bacterium	0.0	3.0	0.0	0.0	1.0	0.0	2.0	18.0	11.0	14.0	20.0	24.0	24.0	23.0	3.0	6.0	11.0	5.0	33.0	71.0	32.0	0.0	0.0	11.0	0.0	0.0	0.0	0.0	20.0	21.0	12.0	10.0	9.0	0.0	0.0	0.0	0.0	0.0	0.0	28.0	24.0	12.0
OTU577637482	Bacteria; Proteobacteria; Deltaproteobacteria; Desulfobacterales; Desulfobacteraceae; uncultured; uncultured bacterium	1.0	31.0	2.0	2.0	5.0	3.0	6.0	2.0	3.0	1.0	0.0	0.0	3.0	15.0	7.0	1.0	0.0	3.0	2.0	2.0	1.0	7.0	1.0	11.0	0.0	0.0	2.0	0.0	35.0	15.0	15.0	1.0	10.0	0.0	28.0	0.0	0.0	19.0	69.0	4.0	0.0	1.0
OTU180458497	Bacteria; Firmicutes; Clostridia; Clostridiales; Defluviitaleaceae; Defluviitaleaceae UCG-011	103.0	49.0	18.0	0.0	1.0	1.0	2.0	2.0	8.0	0.0	13.0	2.0	0.0	0.0	0.0	0.0	0.0	0.0	10.0	22.0	4.0	0.0	0.0	0.0	0.0	0.0	0.0	103.0	18.0	310.0	0.0	6.0	0.0	0.0	0.0	0.0	0.0	0.0	0.0	3.0	1.0	0.0
OTU84430042	Unassigned	5.0	0.0	0.0	0.0	0.0	0.0	4.0	0.0	3.0	2.0	1.0	0.0	7.0	2.0	8.0	2.0	2.0	6.0	10.0	34.0	14.0	0.0	0.0	0.0	0.0	0.0	0.0	12.0	14.0	0.0	15.0	0.0	0.0	0.0	0.0	0.0	0.0	0.0	0.0	2.0	7.0	7.0
OTU320278117	Bacteria; Parcubacteria; uncultured bacterium; uncultured bacterium; uncultured bacterium; uncultured bacterium; uncultured bacterium	0.0	13.0	3.0	1.0	1.0	1.0	117.0	82.0	48.0	28.0	23.0	32.0	112.0	105.0	49.0	12.0	23.0	11.0	241.0	245.0	452.0	0.0	0.0	2.0	0.0	0.0	0.0	0.0	42.0	15.0	13.0	31.0	3.0	0.0	0.0	1.0	0.0	0.0	0.0	85.0	138.0	57.0
OTU589285368	Bacteria; Ignavibacteriae; Ignavibacteria; Ignavibacteriales; LD-RB-34; uncultured bacterium; uncultured bacterium	0.0	0.0	1.0	0.0	0.0	0.0	0.0	0.0	0.0	4.0	0.0	0.0	0.0	0.0	1.0	0.0	1.0	1.0	2.0	0.0	0.0	0.0	9.0	3.0	8.0	5.0	0.0	22.0	5.0	33.0	2.0	0.0	0.0	0.0	0.0	0.0	0.0	63.0	0.0	0.0	0.0	0.0
OTU391585463	Bacteria; Firmicutes; Clostridia; Halanaerobiales; ODP1230B8.23	0.0	0.0	0.0	0.0	0.0	0.0	15.0	23.0	49.0	0.0	0.0	0.0	0.0	1.0	0.0	4.0	6.0	1.0	33.0	16.0	33.0	0.0	0.0	0.0	0.0	0.0	0.0	0.0	0.0	0.0	0.0	0.0	0.0	0.0	0.0	0.0	0.0	0.0	0.0	20.0	24.0	13.0
OTU900361911	Bacteria; Spirochaetae; Spirochaetes; Spirochaetales; Spirochaetaceae; uncultured; Ambiguous_taxa	4.0	1.0	1.0	10.0	0.0	1.0	2.0	4.0	5.0	0.0	0.0	0.0	1.0	3.0	1.0	5.0	3.0	12.0	2.0	3.0	9.0	5.0	15.0	3.0	14.0	21.0	50.0	16.0	0.0	1.0	10.0	0.0	0.0	0.0	0.0	16.0	0.0	0.0	0.0	3.0	11.0	8.0
OTU91179078	Bacteria; Proteobacteria; Deltaproteobacteria; Desulfuromonadales; Geobacteraceae; Geobacter; Ambiguous_taxa	3.0	31.0	81.0	1.0	0.0	0.0	9.0	3.0	14.0	0.0	1.0	13.0	2.0	1.0	13.0	0.0	0.0	2.0	0.0	3.0	1.0	0.0	0.0	0.0	0.0	0.0	0.0	0.0	0.0	0.0	16.0	4.0	0.0	0.0	0.0	73.0	0.0	0.0	0.0	3.0	4.0	5.0
OTU267233055	Bacteria; Proteobacteria; Gammaproteobacteria; Legionellales; Coxiellaceae; Coxiella	0.0	3.0	0.0	1.0	0.0	2.0	0.0	11.0	2.0	2.0	0.0	7.0	0.0	1.0	2.0	0.0	0.0	0.0	5.0	0.0	45.0	6.0	9.0	4.0	0.0	38.0	0.0	14.0	0.0	19.0	8.0	5.0	0.0	0.0	0.0	0.0	0.0	0.0	0.0	0.0	1.0	3.0
OTU2856784	Bacteria; Bacteroidetes; Bacteroidia; Bacteroidales; Porphyromonadaceae; uncultured; uncultured bacterium	0.0	0.0	0.0	0.0	0.0	0.0	0.0	0.0	0.0	0.0	0.0	0.0	0.0	0.0	0.0	0.0	0.0	14.0	0.0	23.0	0.0	0.0	0.0	0.0	0.0	0.0	0.0	156.0	1.0	0.0	0.0	0.0	0.0	0.0	0.0	0.0	0.0	0.0	0.0	0.0	0.0	0.0
OTU470655508	Bacteria; Proteobacteria; Alphaproteobacteria; Rhodospirillales; Rhodospirillaceae; uncultured	1.0	0.0	1.0	2.0	0.0	2.0	2.0	6.0	1.0	0.0	0.0	0.0	0.0	0.0	2.0	1.0	2.0	1.0	1.0	7.0	1.0	5.0	0.0	0.0	0.0	1.0	0.0	0.0	0.0	10.0	1.0	0.0	0.0	32.0	0.0	84.0	0.0	0.0	0.0	0.0	0.0	5.0
OTU968156033	Bacteria; Spirochaetae; Spirochaetes; Spirochaetales; Spirochaetaceae; uncultured; uncultured Spirochaetes bacterium	26.0	4.0	3.0	16.0	8.0	13.0	14.0	9.0	19.0	5.0	13.0	5.0	0.0	0.0	1.0	4.0	3.0	7.0	4.0	20.0	48.0	38.0	29.0	57.0	5.0	10.0	12.0	26.0	19.0	18.0	13.0	12.0	14.0	57.0	26.0	13.0	0.0	0.0	0.0	6.0	22.0	8.0
OTU793652301	Archaea; Aenigmarchaeota; Aenigmarchaeota Incertae Sedis; Unknown Order; Unknown Family; Candidatus Aenigmarchaeum; uncultured archaeon	4.0	48.0	22.0	0.0	3.0	2.0	23.0	56.0	111.0	64.0	58.0	87.0	218.0	311.0	215.0	3.0	5.0	5.0	279.0	556.0	499.0	11.0	2.0	22.0	1.0	3.0	1.0	0.0	113.0	60.0	21.0	8.0	0.0	0.0	12.0	8.0	26.0	0.0	64.0	160.0	89.0	40.0
OTU363601738	Unassigned	0.0	0.0	0.0	0.0	0.0	2.0	0.0	0.0	0.0	1.0	0.0	0.0	0.0	4.0	0.0	1.0	0.0	0.0	12.0	0.0	0.0	0.0	1.0	29.0	0.0	123.0	0.0	0.0	0.0	0.0	0.0	0.0	0.0	0.0	0.0	0.0	0.0	0.0	0.0	0.0	0.0	7.0
OTU689672827	Bacteria; Proteobacteria; Deltaproteobacteria; Desulfarculales; Desulfarculaceae; uncultured; uncultured bacterium	7.0	8.0	18.0	13.0	4.0	1.0	1.0	2.0	0.0	0.0	13.0	10.0	1.0	0.0	2.0	7.0	0.0	3.0	2.0	6.0	3.0	54.0	35.0	7.0	0.0	1.0	1.0	73.0	14.0	146.0	31.0	11.0	0.0	0.0	0.0	11.0	0.0	1.0	0.0	1.0	1.0	2.0
OTU364724804	Bacteria; Proteobacteria; Deltaproteobacteria; Desulfobacterales; Desulfobulbaceae	9.0	2.0	5.0	4.0	8.0	5.0	12.0	6.0	24.0	12.0	21.0	14.0	112.0	52.0	75.0	0.0	1.0	0.0	156.0	0.0	13.0	6.0	48.0	151.0	0.0	0.0	0.0	125.0	51.0	273.0	41.0	45.0	27.0	0.0	40.0	3.0	0.0	0.0	0.0	109.0	166.0	1.0
OTU981084030	Bacteria; AC1	9.0	0.0	0.0	51.0	35.0	55.0	18.0	9.0	21.0	89.0	77.0	38.0	120.0	95.0	30.0	1.0	0.0	2.0	36.0	100.0	27.0	8.0	73.0	27.0	0.0	0.0	6.0	66.0	337.0	140.0	77.0	51.0	62.0	0.0	113.0	5.0	149.0	100.0	0.0	71.0	127.0	85.0
OTU672399253	Bacteria; Proteobacteria; Betaproteobacteria; Rhodocyclales; Rhodocyclaceae; Propionivibrio; uncultured bacterium	0.0	0.0	1.0	13.0	0.0	0.0	100.0	99.0	45.0	0.0	4.0	0.0	27.0	0.0	0.0	0.0	0.0	0.0	6.0	15.0	42.0	0.0	0.0	0.0	0.0	0.0	5.0	0.0	0.0	0.0	58.0	0.0	0.0	0.0	205.0	161.0	0.0	0.0	0.0	0.0	0.0	0.0
OTU4199737	Unassigned	0.0	0.0	2.0	0.0	0.0	1.0	35.0	0.0	0.0	0.0	0.0	0.0	18.0	29.0	10.0	10.0	3.0	14.0	21.0	65.0	53.0	5.0	0.0	0.0	0.0	1.0	0.0	0.0	0.0	0.0	1.0	0.0	0.0	0.0	0.0	0.0	0.0	0.0	13.0	0.0	5.0	50.0
OTU624436866	Bacteria; Proteobacteria; Deltaproteobacteria; Desulfarculales; Desulfarculaceae; uncultured; uncultured bacterium	0.0	1.0	0.0	0.0	0.0	0.0	9.0	0.0	5.0	0.0	0.0	6.0	11.0	0.0	8.0	9.0	5.0	2.0	4.0	18.0	14.0	0.0	0.0	0.0	1.0	0.0	3.0	0.0	0.0	20.0	10.0	0.0	0.0	0.0	0.0	45.0	0.0	0.0	0.0	0.0	1.0	0.0
OTU865087077	Unassigned	0.0	0.0	1.0	0.0	0.0	0.0	1.0	0.0	4.0	0.0	0.0	0.0	1.0	2.0	3.0	0.0	0.0	0.0	2.0	86.0	33.0	0.0	0.0	0.0	0.0	0.0	0.0	0.0	7.0	0.0	9.0	0.0	0.0	0.0	0.0	0.0	0.0	0.0	0.0	0.0	3.0	0.0
OTU597914608	Bacteria; Proteobacteria; Deltaproteobacteria; Myxococcales; Phaselicystidaceae; Phaselicystis; uncultured bacterium	0.0	0.0	0.0	0.0	0.0	0.0	13.0	1.0	4.0	1.0	5.0	10.0	1.0	3.0	0.0	17.0	32.0	36.0	0.0	1.0	0.0	6.0	16.0	0.0	5.0	11.0	15.0	0.0	0.0	0.0	0.0	0.0	0.0	0.0	0.0	0.0	0.0	0.0	0.0	1.0	4.0	4.0
OTU69597667	Bacteria; Firmicutes; Erysipelotrichia; Erysipelotrichales; Erysipelotrichaceae; Erysipelothrix; uncultured bacterium	1.0	0.0	2.0	2.0	5.0	4.0	9.0	3.0	12.0	16.0	16.0	5.0	0.0	1.0	0.0	0.0	1.0	1.0	0.0	0.0	1.0	0.0	19.0	3.0	7.0	9.0	15.0	35.0	13.0	44.0	6.0	29.0	8.0	0.0	95.0	44.0	0.0	0.0	0.0	4.0	1.0	1.0
OTU80534654	Unassigned	14.0	40.0	2.0	0.0	3.0	9.0	0.0	0.0	0.0	19.0	15.0	17.0	11.0	2.0	11.0	0.0	0.0	0.0	5.0	23.0	1.0	3.0	51.0	29.0	0.0	0.0	1.0	70.0	20.0	140.0	54.0	4.0	0.0	0.0	25.0	2.0	0.0	0.0	0.0	12.0	5.0	2.0
OTU127809720	Bacteria; Chloroflexi; Anaerolineae; Anaerolineales; Anaerolineaceae; uncultured; uncultured bacterium	17.0	6.0	41.0	0.0	0.0	0.0	21.0	1.0	8.0	0.0	2.0	0.0	18.0	0.0	1.0	9.0	22.0	6.0	3.0	1.0	5.0	0.0	2.0	25.0	13.0	6.0	22.0	54.0	0.0	9.0	0.0	0.0	0.0	0.0	0.0	10.0	0.0	0.0	0.0	3.0	16.0	2.0
OTU75328016	Unassigned	0.0	0.0	0.0	0.0	1.0	0.0	5.0	13.0	22.0	2.0	26.0	18.0	266.0	3.0	130.0	0.0	0.0	0.0	2.0	0.0	0.0	2.0	7.0	16.0	0.0	0.0	0.0	0.0	12.0	224.0	26.0	13.0	0.0	0.0	0.0	0.0	35.0	0.0	0.0	23.0	681.0	5.0
OTU338146363	Bacteria; Proteobacteria; Deltaproteobacteria; Oligoflexales; 0319-6G20; uncultured delta proteobacterium; uncultured delta proteobacterium	0.0	0.0	1.0	0.0	0.0	0.0	1.0	0.0	2.0	1.0	1.0	4.0	11.0	6.0	3.0	0.0	0.0	0.0	3.0	4.0	5.0	0.0	0.0	1.0	0.0	1.0	0.0	8.0	36.0	27.0	1.0	9.0	14.0	0.0	0.0	0.0	26.0	0.0	0.0	0.0	5.0	1.0
OTU64174035	Bacteria; Parcubacteria; uncultured bacterium; uncultured bacterium; uncultured bacterium; uncultured bacterium; uncultured bacterium	0.0	0.0	1.0	0.0	0.0	0.0	6.0	0.0	0.0	0.0	0.0	0.0	0.0	22.0	2.0	33.0	6.0	16.0	6.0	79.0	34.0	0.0	0.0	0.0	122.0	73.0	8.0	0.0	0.0	0.0	2.0	0.0	0.0	0.0	0.0	0.0	0.0	0.0	0.0	3.0	6.0	9.0
OTU319725510	Bacteria; Parcubacteria; Candidatus Falkowbacteria	0.0	0.0	3.0	0.0	0.0	0.0	0.0	0.0	0.0	0.0	0.0	0.0	0.0	0.0	2.0	0.0	0.0	3.0	0.0	272.0	1.0	0.0	0.0	0.0	0.0	0.0	0.0	0.0	0.0	0.0	2.0	0.0	0.0	0.0	0.0	0.0	0.0	0.0	0.0	0.0	0.0	0.0
OTU931546749	Bacteria; Spirochaetae; Spirochaetes; Spirochaetales; Spirochaetaceae; uncultured; Ambiguous_taxa	3.0	1.0	4.0	0.0	0.0	0.0	1.0	5.0	5.0	0.0	0.0	0.0	0.0	5.0	1.0	15.0	7.0	6.0	5.0	14.0	13.0	2.0	3.0	5.0	10.0	18.0	27.0	6.0	0.0	0.0	10.0	1.0	0.0	0.0	31.0	0.0	0.0	0.0	0.0	3.0	4.0	3.0
OTU136154633	Bacteria; Deferribacteres; Deferribacteres Incertae Sedis; Unknown Order; Unknown Family; Caldithrix	0.0	0.0	0.0	0.0	0.0	0.0	0.0	0.0	0.0	2.0	0.0	0.0	0.0	0.0	1.0	44.0	0.0	59.0	0.0	0.0	0.0	0.0	0.0	6.0	1.0	0.0	16.0	0.0	0.0	0.0	5.0	1.0	0.0	0.0	25.0	0.0	0.0	0.0	0.0	0.0	0.0	1.0
OTU884559596	Unassigned	0.0	0.0	1.0	0.0	0.0	0.0	0.0	0.0	2.0	1.0	2.0	7.0	1.0	7.0	0.0	27.0	25.0	22.0	1.0	6.0	3.0	7.0	0.0	0.0	15.0	49.0	26.0	101.0	0.0	68.0	3.0	0.0	0.0	0.0	0.0	0.0	0.0	0.0	0.0	0.0	0.0	1.0
OTU596010994	Unassigned	0.0	0.0	0.0	0.0	1.0	0.0	39.0	46.0	74.0	1.0	7.0	2.0	48.0	34.0	25.0	0.0	5.0	8.0	266.0	213.0	393.0	0.0	0.0	0.0	0.0	0.0	0.0	0.0	0.0	0.0	0.0	4.0	0.0	0.0	0.0	6.0	0.0	0.0	0.0	104.0	157.0	141.0
OTU782487471	Bacteria; Chloroflexi; Anaerolineae; Anaerolineales; Anaerolineaceae; uncultured; uncultured bacterium	14.0	8.0	8.0	19.0	26.0	24.0	82.0	32.0	14.0	8.0	8.0	3.0	18.0	83.0	19.0	3.0	2.0	1.0	7.0	14.0	12.0	13.0	25.0	21.0	0.0	5.0	4.0	31.0	37.0	34.0	26.0	18.0	23.0	0.0	22.0	11.0	50.0	119.0	142.0	50.0	61.0	45.0
OTU509814757	Bacteria; Proteobacteria; Deltaproteobacteria; Myxococcales; Archangiaceae; Anaeromyxobacter; uncultured bacterium	0.0	0.0	0.0	0.0	0.0	0.0	0.0	0.0	0.0	0.0	0.0	0.0	0.0	0.0	0.0	38.0	0.0	6.0	0.0	0.0	0.0	0.0	0.0	0.0	127.0	0.0	1.0	0.0	0.0	0.0	0.0	0.0	0.0	0.0	0.0	0.0	0.0	0.0	0.0	0.0	0.0	0.0
OTU557300599	Bacteria; Planctomycetes; Planctomycetacia; Planctomycetales; Planctomycetaceae; uncultured; uncultured bacterium	0.0	0.0	0.0	0.0	0.0	3.0	0.0	0.0	0.0	0.0	0.0	0.0	3.0	0.0	0.0	0.0	0.0	0.0	0.0	0.0	0.0	0.0	0.0	19.0	0.0	1.0	0.0	0.0	0.0	0.0	0.0	0.0	0.0	0.0	0.0	0.0	0.0	0.0	124.0	0.0	0.0	1.0
OTU998755303	Unassigned	0.0	0.0	0.0	0.0	0.0	0.0	0.0	0.0	16.0	0.0	0.0	0.0	0.0	0.0	1.0	0.0	0.0	0.0	88.0	0.0	0.0	0.0	0.0	0.0	0.0	0.0	0.0	0.0	0.0	0.0	0.0	0.0	0.0	0.0	0.0	0.0	0.0	0.0	0.0	14.0	34.0	0.0
OTU673032887	Bacteria; Cyanobacteria; Melainabacteria; Gastranaerophilales; uncultured bacterium; uncultured bacterium; uncultured bacterium	0.0	1.0	1.0	0.0	0.0	4.0	3.0	0.0	5.0	5.0	77.0	0.0	11.0	0.0	2.0	0.0	1.0	4.0	33.0	33.0	27.0	0.0	0.0	7.0	0.0	0.0	0.0	0.0	0.0	0.0	40.0	1.0	0.0	0.0	0.0	1.0	1.0	0.0	0.0	8.0	116.0	12.0
OTU536363371	Bacteria; Spirochaetae; Spirochaetes; Spirochaetales; Leptospiraceae; uncultured	15.0	10.0	7.0	26.0	4.0	8.0	7.0	29.0	50.0	50.0	62.0	51.0	33.0	12.0	15.0	0.0	3.0	0.0	35.0	32.0	3.0	15.0	34.0	38.0	0.0	3.0	3.0	41.0	106.0	248.0	31.0	57.0	73.0	85.0	52.0	75.0	52.0	18.0	23.0	24.0	29.0	12.0
OTU450285455	Bacteria; Elusimicrobia; Elusimicrobia; HydGH-Bac75; uncultured bacterium; uncultured bacterium; uncultured bacterium	1.0	11.0	2.0	0.0	0.0	0.0	0.0	9.0	10.0	0.0	0.0	0.0	0.0	0.0	0.0	1.0	2.0	3.0	6.0	8.0	1.0	0.0	1.0	0.0	0.0	2.0	0.0	43.0	23.0	0.0	17.0	0.0	0.0	0.0	0.0	1.0	0.0	0.0	0.0	1.0	5.0	1.0
OTU457835791	Bacteria; Nitrospirae; Nitrospira; Nitrospirales; Nitrospiraceae; uncultured; uncultured bacterium	0.0	0.0	0.0	0.0	0.0	0.0	0.0	0.0	0.0	0.0	0.0	0.0	0.0	1.0	0.0	0.0	0.0	17.0	0.0	0.0	0.0	0.0	0.0	5.0	230.0	142.0	0.0	0.0	0.0	0.0	0.0	0.0	0.0	0.0	0.0	0.0	0.0	0.0	0.0	0.0	0.0	0.0
OTU22171319	Unassigned	0.0	3.0	2.0	5.0	1.0	0.0	17.0	8.0	25.0	5.0	0.0	0.0	38.0	34.0	17.0	0.0	2.0	2.0	38.0	90.0	38.0	0.0	0.0	0.0	0.0	0.0	0.0	0.0	0.0	0.0	0.0	0.0	0.0	0.0	0.0	0.0	0.0	0.0	119.0	13.0	42.0	17.0
OTU911540641	Bacteria; Spirochaetae; Spirochaetes; Spirochaetales; Brevinemataceae; Brevinema; uncultured bacterium	0.0	0.0	0.0	0.0	12.0	18.0	2.0	0.0	18.0	0.0	0.0	0.0	0.0	0.0	0.0	0.0	0.0	0.0	0.0	0.0	0.0	63.0	44.0	1.0	0.0	0.0	0.0	0.0	0.0	0.0	273.0	117.0	0.0	0.0	0.0	0.0	0.0	0.0	0.0	4.0	4.0	4.0
OTU226423772	Unassigned	4.0	4.0	5.0	42.0	32.0	61.0	2.0	5.0	60.0	7.0	15.0	4.0	17.0	0.0	11.0	4.0	1.0	1.0	19.0	77.0	10.0	0.0	1.0	0.0	6.0	0.0	0.0	9.0	0.0	0.0	227.0	91.0	11.0	0.0	0.0	0.0	0.0	0.0	43.0	10.0	24.0	2.0
OTU218103944	Unassigned	0.0	0.0	0.0	0.0	1.0	0.0	0.0	14.0	21.0	8.0	2.0	0.0	30.0	56.0	22.0	0.0	0.0	0.0	42.0	94.0	68.0	0.0	0.0	0.0	0.0	0.0	0.0	0.0	0.0	0.0	0.0	0.0	0.0	0.0	0.0	0.0	0.0	0.0	0.0	15.0	70.0	14.0
OTU761865544	Bacteria; Gracilibacteria; uncultured Compostimonas sp.; uncultured Compostimonas sp.; uncultured Compostimonas sp.; uncultured Compostimonas sp.; uncultured Compostimonas sp.	0.0	4.0	0.0	0.0	0.0	0.0	8.0	5.0	12.0	2.0	2.0	0.0	42.0	35.0	62.0	0.0	0.0	4.0	8.0	46.0	1.0	0.0	0.0	0.0	0.0	0.0	0.0	0.0	0.0	15.0	1.0	3.0	26.0	0.0	0.0	0.0	0.0	0.0	0.0	12.0	4.0	12.0
OTU580288896	Bacteria; Fusobacteria; Fusobacteriia; Fusobacteriales; Leptotrichiaceae; uncultured; uncultured bacterium	2.0	2.0	0.0	7.0	10.0	5.0	0.0	15.0	0.0	14.0	20.0	5.0	4.0	3.0	2.0	0.0	0.0	0.0	3.0	4.0	2.0	0.0	0.0	0.0	0.0	1.0	0.0	8.0	6.0	6.0	0.0	7.0	55.0	20.0	0.0	157.0	0.0	31.0	0.0	10.0	18.0	18.0
OTU674091317	Bacteria; Proteobacteria; Betaproteobacteria; Burkholderiales; Comamonadaceae	0.0	3.0	146.0	15.0	16.0	17.0	0.0	72.0	0.0	62.0	88.0	1.0	0.0	2.0	0.0	0.0	0.0	1.0	3.0	0.0	0.0	666.0	19.0	7.0	0.0	1.0	0.0	0.0	27.0	15.0	0.0	1.0	0.0	0.0	0.0	0.0	0.0	0.0	0.0	0.0	0.0	1.0
OTU960407711	Bacteria; Proteobacteria; Gammaproteobacteria; Chromatiales; Halothiobacillaceae; Halothiobacillus	3.0	1.0	5.0	30.0	6.0	46.0	3.0	0.0	0.0	796.0	182.0	11.0	1.0	2.0	1.0	0.0	0.0	0.0	0.0	0.0	0.0	0.0	0.0	0.0	1.0	3.0	7.0	0.0	8.0	8.0	0.0	2.0	0.0	55.0	107.0	175.0	0.0	0.0	0.0	0.0	0.0	0.0
OTU538963582	Bacteria; Chloroflexi; SBR2076	0.0	2.0	5.0	0.0	1.0	0.0	0.0	0.0	2.0	1.0	2.0	10.0	13.0	18.0	3.0	0.0	0.0	8.0	3.0	13.0	7.0	6.0	8.0	5.0	17.0	15.0	7.0	28.0	7.0	43.0	1.0	3.0	2.0	0.0	0.0	0.0	0.0	0.0	8.0	1.0	7.0	0.0
OTU131435891	Bacteria; Fibrobacteres; Fibrobacteria; Fibrobacterales; possible family 01; uncultured bacterium; uncultured bacterium	0.0	129.0	0.0	4.0	1.0	0.0	0.0	62.0	138.0	28.0	8.0	42.0	0.0	0.0	0.0	0.0	0.0	0.0	1.0	0.0	0.0	25.0	62.0	0.0	0.0	0.0	3.0	0.0	0.0	0.0	76.0	0.0	0.0	17.0	37.0	0.0	336.0	0.0	0.0	1.0	0.0	0.0
OTU160081653	Unassigned	0.0	1.0	0.0	0.0	1.0	0.0	0.0	20.0	68.0	0.0	1.0	3.0	0.0	5.0	5.0	7.0	0.0	2.0	9.0	3.0	0.0	1.0	0.0	0.0	0.0	0.0	0.0	0.0	0.0	0.0	0.0	0.0	0.0	0.0	0.0	0.0	0.0	0.0	0.0	29.0	34.0	18.0
OTU252432785	Bacteria; Chlorobi; Chlorobia; Chlorobiales; OPB56; uncultured bacterium; uncultured bacterium	2.0	7.0	8.0	0.0	1.0	1.0	18.0	12.0	23.0	5.0	9.0	5.0	14.0	17.0	24.0	34.0	6.0	56.0	39.0	76.0	100.0	13.0	14.0	21.0	9.0	73.0	9.0	14.0	210.0	25.0	8.0	6.0	0.0	0.0	5.0	29.0	0.0	40.0	0.0	0.0	9.0	28.0
OTU188857511	Unassigned	0.0	0.0	0.0	0.0	0.0	0.0	7.0	2.0	5.0	3.0	2.0	6.0	11.0	18.0	12.0	1.0	6.0	8.0	11.0	44.0	54.0	2.0	3.0	0.0	0.0	5.0	0.0	0.0	0.0	0.0	4.0	3.0	0.0	0.0	0.0	0.0	0.0	0.0	0.0	3.0	28.0	6.0
OTU329657703	Bacteria; Proteobacteria; Deltaproteobacteria; Desulfuromonadales; Geobacteraceae; Geobacter; uncultured bacterium	2.0	0.0	1.0	12.0	13.0	5.0	0.0	0.0	0.0	0.0	2.0	0.0	3.0	0.0	0.0	16.0	42.0	8.0	4.0	2.0	1.0	0.0	0.0	0.0	0.0	0.0	0.0	39.0	6.0	56.0	0.0	0.0	0.0	0.0	0.0	0.0	0.0	0.0	358.0	6.0	0.0	3.0
OTU336552982	Bacteria; Proteobacteria; Betaproteobacteria; Hydrogenophilales; Hydrogenophilaceae; Ferritrophicum; Ambiguous_taxa	0.0	1.0	0.0	0.0	0.0	25.0	0.0	1.0	0.0	0.0	0.0	0.0	0.0	5.0	7.0	1.0	3.0	49.0	14.0	0.0	0.0	4.0	0.0	6.0	0.0	0.0	1.0	0.0	0.0	0.0	0.0	3.0	7.0	0.0	18.0	13.0	0.0	0.0	94.0	0.0	0.0	24.0
OTU271962571	Bacteria; Spirochaetae; Spirochaetes; Spirochaetales; Spirochaetaceae; Treponema	7.0	13.0	14.0	8.0	3.0	0.0	40.0	189.0	240.0	5.0	8.0	22.0	28.0	81.0	13.0	20.0	29.0	3.0	170.0	78.0	61.0	22.0	56.0	34.0	7.0	14.0	31.0	0.0	12.0	0.0	2.0	8.0	0.0	0.0	47.0	2.0	0.0	0.0	0.0	80.0	53.0	76.0
OTU161587744	Bacteria; Omnitrophica; uncultured bacterium; uncultured bacterium; uncultured bacterium; uncultured bacterium; uncultured bacterium	0.0	0.0	0.0	0.0	0.0	0.0	0.0	4.0	0.0	0.0	0.0	0.0	0.0	6.0	0.0	0.0	2.0	0.0	149.0	1.0	25.0	0.0	0.0	0.0	0.0	0.0	0.0	0.0	0.0	0.0	0.0	0.0	0.0	0.0	0.0	0.0	0.0	0.0	0.0	0.0	0.0	6.0
OTU887858142	Unassigned	0.0	0.0	0.0	7.0	39.0	0.0	0.0	0.0	0.0	52.0	1.0	0.0	11.0	0.0	1.0	0.0	0.0	0.0	0.0	0.0	0.0	0.0	0.0	0.0	0.0	0.0	0.0	0.0	0.0	0.0	0.0	0.0	0.0	0.0	0.0	152.0	0.0	0.0	0.0	3283.0	0.0	1.0
OTU885971003	Bacteria; Nitrospinae; Belgica2005-10-ZG-3; Ambiguous_taxa; Ambiguous_taxa; Ambiguous_taxa; Ambiguous_taxa	0.0	0.0	0.0	0.0	0.0	0.0	0.0	0.0	0.0	0.0	0.0	0.0	0.0	0.0	0.0	9.0	146.0	17.0	0.0	0.0	0.0	0.0	0.0	0.0	0.0	13.0	0.0	0.0	0.0	0.0	0.0	0.0	0.0	0.0	0.0	0.0	0.0	0.0	0.0	0.0	0.0	0.0
OTU812506070	Bacteria; Chloroflexi; Anaerolineae; Anaerolineales; Anaerolineaceae; uncultured; uncultured bacterium	36.0	22.0	15.0	2.0	7.0	1.0	5.0	3.0	4.0	8.0	28.0	2.0	24.0	11.0	10.0	22.0	26.0	4.0	6.0	22.0	9.0	51.0	29.0	205.0	1.0	2.0	8.0	52.0	64.0	120.0	5.0	5.0	0.0	0.0	0.0	0.0	0.0	0.0	0.0	18.0	14.0	14.0
OTU694151641	Unassigned	0.0	0.0	1.0	0.0	1.0	0.0	1.0	6.0	108.0	0.0	0.0	0.0	0.0	0.0	5.0	0.0	0.0	0.0	3.0	1.0	144.0	0.0	0.0	0.0	0.0	0.0	0.0	0.0	24.0	4.0	0.0	0.0	0.0	0.0	0.0	0.0	0.0	0.0	0.0	0.0	8.0	0.0
OTU378844960	Bacteria; Proteobacteria; Deltaproteobacteria; Desulfobacterales; Desulfobulbaceae; Desulfurivibrio; uncultured bacterium	11.0	3.0	0.0	31.0	26.0	64.0	14.0	10.0	28.0	23.0	38.0	22.0	5.0	18.0	4.0	1.0	5.0	2.0	31.0	7.0	1.0	5.0	40.0	61.0	18.0	15.0	17.0	53.0	64.0	148.0	80.0	19.0	12.0	57.0	0.0	74.0	277.0	0.0	0.0	3.0	11.0	6.0
OTU683392472	Bacteria; Fibrobacteres; Chitinivibrionia; uncultured; uncultured bacterium; uncultured bacterium; uncultured bacterium	0.0	0.0	0.0	0.0	0.0	0.0	0.0	0.0	4.0	6.0	0.0	0.0	1.0	0.0	0.0	2.0	0.0	5.0	0.0	1.0	1.0	0.0	0.0	0.0	25.0	120.0	1.0	6.0	0.0	0.0	1.0	0.0	0.0	0.0	0.0	0.0	0.0	0.0	0.0	0.0	0.0	0.0
OTU29709263	Bacteria; Aminicenantes; uncultured bacterium; uncultured bacterium; uncultured bacterium; uncultured bacterium; uncultured bacterium	11.0	1.0	0.0	6.0	3.0	2.0	0.0	0.0	0.0	107.0	67.0	14.0	0.0	0.0	0.0	0.0	0.0	0.0	0.0	0.0	0.0	0.0	0.0	0.0	0.0	0.0	0.0	0.0	0.0	2.0	0.0	0.0	0.0	0.0	35.0	82.0	0.0	0.0	0.0	0.0	0.0	0.0
OTU147563139	Bacteria; Proteobacteria; Gammaproteobacteria; Legionellales; Coxiellaceae; Coxiella; uncultured bacterium	0.0	1.0	0.0	0.0	0.0	1.0	1.0	3.0	1.0	0.0	0.0	1.0	0.0	3.0	0.0	0.0	0.0	0.0	0.0	4.0	0.0	2.0	4.0	0.0	1.0	3.0	2.0	19.0	0.0	34.0	2.0	0.0	0.0	0.0	0.0	0.0	62.0	0.0	0.0	0.0	2.0	4.0
OTU117694690	Bacteria; Proteobacteria; Deltaproteobacteria; Desulfobacterales; Desulfobulbaceae	0.0	0.0	0.0	2.0	3.0	1.0	12.0	17.0	94.0	122.0	5.0	17.0	12.0	1.0	36.0	0.0	0.0	0.0	29.0	0.0	4.0	0.0	21.0	39.0	0.0	0.0	0.0	8.0	78.0	6.0	55.0	54.0	37.0	0.0	0.0	2.0	0.0	0.0	0.0	67.0	360.0	1.0
